# Supplementary material for: Application of Statistical Mirroring in Biological Sequence Analysis
Source: Preprints.org preprint supplement (doi:10.20944/preprints201912.0069.v1), 2019-12-05
Supplement: Supplementary file 1 [file supplementary]

## Sheet: M01 (Aligned & unaligned seq.)
	OPTINALYSIS: SEQUENCE ANALYSIS THROUGH A LOOKING-GLASS
	CN = Central node; Kc = Kabirian coefficient of similarity; %Sim. = Percentage similarity; %Dsim. = Percentage dissimilarity																NUM. = Numeration; DEN. = Denumeration
				For Kc >1		For Kc <1
	RESULTS	CN	Kc	%Sim.	%Dsim.	%Sim.	%Dsim.										NUM	DEN		NUM	DEN
	M1	13	0.973138	1.11687	-0.116866	0.895363	0.104637										1.02686	0.919414		-0.919414	-1.02686
	M2	13	0.975329	1.10657	-0.10657	0.903693	0.0963068										1.02467	0.925988		-0.925988	-1.02467
	M3	13	0.96958	1.1339	-0.1339	0.881912	0.118088										1.03042	0.90874		-0.90874	-1.03042
	M4	13	0.97133	1.12547	-0.125471	0.888517	0.111483										1.02867	0.913991		-0.913991	-1.02867
	M5	13	0.977429	1.09684	-0.0968434	0.911707	0.0882928										1.02257	0.932286		-0.932286	-1.02257
	M6	13	0.974556	1.11018	-0.110184	0.900751	0.0992488										1.02544	0.923669		-0.923669	-1.02544
	M7	13	0.970951	1.12729	-0.12729	0.887083	0.112917										1.02905	0.912852		-0.912852	-1.02905
	M8	13	0.972102	1.12178	-0.121784	0.891437	0.108563										1.0279	0.916306		-0.916306	-1.0279
	M9	13	0.971638	1.124	-0.124	0.889679	0.110321										1.02836	0.914913		-0.914913	-1.02836
	M10	13	0.974858	1.10877	-0.108775	0.901897	0.0981034										1.02514	0.924573		-0.924573	-1.02514
	M11	13	0.974345	1.11118	-0.111177	0.899947	0.100053										1.02566	0.923035		-0.923035	-1.02566
	M12	13	0.9734	1.11563	-0.115629	0.896355	0.103645										1.0266	0.920199		-0.920199	-1.0266
	X	13	#DIV/0!	#DIV/0!	#DIV/0!	#DIV/0!	#DIV/0!										#DIV/0!	#DIV/0!		#DIV/0!	#DIV/0!
	X	13	#DIV/0!	#DIV/0!	#DIV/0!	#DIV/0!	#DIV/0!										#DIV/0!	#DIV/0!		#DIV/0!	#DIV/0!
	X	13	#DIV/0!	#DIV/0!	#DIV/0!	#DIV/0!	#DIV/0!										#DIV/0!	#DIV/0!		#DIV/0!	#DIV/0!
	X	13	#DIV/0!	#DIV/0!	#DIV/0!	#DIV/0!	#DIV/0!										#DIV/0!	#DIV/0!		#DIV/0!	#DIV/0!
	X	13	#DIV/0!	#DIV/0!	#DIV/0!	#DIV/0!	#DIV/0!										#DIV/0!	#DIV/0!		#DIV/0!	#DIV/0!
	X	13	#DIV/0!	#DIV/0!	#DIV/0!	#DIV/0!	#DIV/0!										#DIV/0!	#DIV/0!		#DIV/0!	#DIV/0!
	X	13	#DIV/0!	#DIV/0!	#DIV/0!	#DIV/0!	#DIV/0!										#DIV/0!	#DIV/0!		#DIV/0!	#DIV/0!
	X	13	#DIV/0!	#DIV/0!	#DIV/0!	#DIV/0!	#DIV/0!										#DIV/0!	#DIV/0!		#DIV/0!	#DIV/0!
	SEQUENCES	INPUT SEQUENCE																												SEQUENCES	COMPUTATION AND CALCULATIONS
	QUANTITATIVE SCALE	M1	M2	M3	M4	M5	M6	M7	M8	M9	M10	M11	M12	X	X	X	X	X	X	X	X									QUANTITATIVE SCALE	M1	M2	M3	M4	M5	M6	M7	M8	M9	M10	M11	M12	X	X	X	X	X	X	X
	1	151	151	151	151	151	151	151	151	151	151	151	151	0	0	0	0	0	0	0	0									1	151	151	151	151	151	151	151	151	151	151	151	151	0	0	0	0	0	0	0
	2	126	135	126	126	126	126	126	126	126	126	126	126	0	0	0	0	0	0	0	0									2	252	270	252	252	252	252	252	252	252	252	252	252	0	0	0	0	0	0	0
	3	151	151	135	151	151	151	151	151	151	151	151	151	0	0	0	0	0	0	0	0									3	453	453	405	453	453	453	453	453	453	453	453	453	0	0	0	0	0	0	0
	4	135	135	135	126	135	135	135	135	135	135	135	135	0	0	0	0	0	0	0	0									4	540	540	540	504	540	540	540	540	540	540	540	540	0	0	0	0	0	0	0
	5	111	111	111	111	135	111	111	111	111	111	111	111	0	0	0	0	0	0	0	0									5	555	555	555	555	675	555	555	555	555	555	555	555	0	0	0	0	0	0	0
	6	126	126	126	126	126	135	126	126	126	126	126	126	0	0	0	0	0	0	0	0									6	756	756	756	756	756	810	756	756	756	756	756	756	0	0	0	0	0	0	0
	7	151	151	151	151	151	151	135	151	151	151	151	151	0	0	0	0	0	0	0	0									7	1057	1057	1057	1057	1057	1057	945	1057	1057	1057	1057	1057	0	0	0	0	0	0	0
	8	135	135	135	135	135	135	135	126	135	135	135	135	0	0	0	0	0	0	0	0									8	1080	1080	1080	1080	1080	1080	1080	1008	1080	1080	1080	1080	0	0	0	0	0	0	0
	9	151	151	151	151	151	151	151	151	135	151	151	151	0	0	0	0	0	0	0	0									9	1359	1359	1359	1359	1359	1359	1359	1359	1215	1359	1359	1359	0	0	0	0	0	0	0
	10	111	111	111	111	111	111	111	111	111	135	111	111	0	0	0	0	0	0	0	0									10	1110	1110	1110	1110	1110	1110	1110	1110	1110	1350	1110	1110	0	0	0	0	0	0	0
	11	111	111	111	111	111	111	111	111	111	111	135	111	0	0	0	0	0	0	0	0									11	1221	1221	1221	1221	1221	1221	1221	1221	1221	1221	1485	1221	0	0	0	0	0	0	0
	12	126	126	126	126	126	126	126	126	126	126	126	135	0	0	0	0	0	0	0	0									12	1512	1512	1512	1512	1512	1512	1512	1512	1512	1512	1512	1620	0	0	0	0	0	0	0
	13	0	0	0	0	0	0	0	0	0	0	0	0	0	0	0	0	0	0	0	0									13	0	0	0	0	0	0	0	0	0	0	0	0	0	0	0	0	0	0	0
	14	151	151	151	151	151	151	151	151	151	151	151	151	0	0	0	0	0	0	0	0									14	2114	2114	2114	2114	2114	2114	2114	2114	2114	2114	2114	2114	0	0	0	0	0	0	0
	15	151	151	151	151	151	151	151	151	151	151	151	151	0	0	0	0	0	0	0	0									15	2265	2265	2265	2265	2265	2265	2265	2265	2265	2265	2265	2265	0	0	0	0	0	0	0
	16	151	151	151	151	151	151	151	151	151	151	151	151	0	0	0	0	0	0	0	0									16	2416	2416	2416	2416	2416	2416	2416	2416	2416	2416	2416	2416	0	0	0	0	0	0	0
	17	151	151	151	151	151	151	151	151	151	151	151	151	0	0	0	0	0	0	0	0									17	2567	2567	2567	2567	2567	2567	2567	2567	2567	2567	2567	2567	0	0	0	0	0	0	0
	18	151	151	151	151	151	151	151	151	151	151	151	151	0	0	0	0	0	0	0	0									18	2718	2718	2718	2718	2718	2718	2718	2718	2718	2718	2718	2718	0	0	0	0	0	0	0
	19	151	151	151	151	151	151	151	151	151	151	151	151	0	0	0	0	0	0	0	0									19	2869	2869	2869	2869	2869	2869	2869	2869	2869	2869	2869	2869	0	0	0	0	0	0	0
	20	151	151	151	151	151	151	151	151	151	151	151	151	0	0	0	0	0	0	0	0									20	3020	3020	3020	3020	3020	3020	3020	3020	3020	3020	3020	3020	0	0	0	0	0	0	0
	21	151	151	151	151	151	151	151	151	151	151	151	151	0	0	0	0	0	0	0	0									21	3171	3171	3171	3171	3171	3171	3171	3171	3171	3171	3171	3171	0	0	0	0	0	0	0
	22	151	151	151	151	151	151	151	151	151	151	151	151	0	0	0	0	0	0	0	0									22	3322	3322	3322	3322	3322	3322	3322	3322	3322	3322	3322	3322	0	0	0	0	0	0	0
	23	151	151	151	151	151	151	151	151	151	151	151	151	0	0	0	0	0	0	0	0									23	3473	3473	3473	3473	3473	3473	3473	3473	3473	3473	3473	3473	0	0	0	0	0	0	0
	24	151	151	151	151	151	151	151	151	151	151	151	151	0	0	0	0	0	0	0	0									24	3624	3624	3624	3624	3624	3624	3624	3624	3624	3624	3624	3624	0	0	0	0	0	0	0
	25	151	151	151	151	151	151	151	151	151	151	151	151	0	0	0	0	0	0	0	0									25	3775	3775	3775	3775	3775	3775	3775	3775	3775	3775	3775	3775	0	0	0	0	0	0	0
	26	0	0	0	0	0	0	0	0	0	0	0	0	0	0	0	0	0	0	0	0									26	0	0	0	0	0	0	0	0	0	0	0	0	0	0	0	0	0	0	0
	27	0	0	0	0	0	0	0	0	0	0	0	0	0	0	0	0	0	0	0	0									27	0	0	0	0	0	0	0	0	0	0	0	0	0	0	0	0	0	0	0
	28	0	0	0	0	0	0	0	0	0	0	0	0	0	0	0	0	0	0	0	0									28	0	0	0	0	0	0	0	0	0	0	0	0	0	0	0	0	0	0	0
	29	0	0	0	0	0	0	0	0	0	0	0	0	0	0	0	0	0	0	0	0									29	0	0	0	0	0	0	0	0	0	0	0	0	0	0	0	0	0	0	0
	30	0	0	0	0	0	0	0	0	0	0	0	0	0	0	0	0	0	0	0	0									30	0	0	0	0	0	0	0	0	0	0	0	0	0	0	0	0	0	0	0
	31	0	0	0	0	0	0	0	0	0	0	0	0	0	0	0	0	0	0	0	0									31	0	0	0	0	0	0	0	0	0	0	0	0	0	0	0	0	0	0	0
	32	0	0	0	0	0	0	0	0	0	0	0	0	0	0	0	0	0	0	0	0									32	0	0	0	0	0	0	0	0	0	0	0	0	0	0	0	0	0	0	0
	33	0	0	0	0	0	0	0	0	0	0	0	0	0	0	0	0	0	0	0	0									33	0	0	0	0	0	0	0	0	0	0	0	0	0	0	0	0	0	0	0
	34	0	0	0	0	0	0	0	0	0	0	0	0	0	0	0	0	0	0	0	0									34	0	0	0	0	0	0	0	0	0	0	0	0	0	0	0	0	0	0	0
	35	0	0	0	0	0	0	0	0	0	0	0	0	0	0	0	0	0	0	0	0									35	0	0	0	0	0	0	0	0	0	0	0	0	0	0	0	0	0	0	0
	36	0	0	0	0	0	0	0	0	0	0	0	0	0	0	0	0	0	0	0	0									36	0	0	0	0	0	0	0	0	0	0	0	0	0	0	0	0	0	0	0
	37	0	0	0	0	0	0	0	0	0	0	0	0	0	0	0	0	0	0	0	0									37	0	0	0	0	0	0	0	0	0	0	0	0	0	0	0	0	0	0	0
	38	0	0	0	0	0	0	0	0	0	0	0	0	0	0	0	0	0	0	0	0									38	0	0	0	0	0	0	0	0	0	0	0	0	0	0	0	0	0	0	0
	39	0	0	0	0	0	0	0	0	0	0	0	0	0	0	0	0	0	0	0	0									39	0	0	0	0	0	0	0	0	0	0	0	0	0	0	0	0	0	0	0
	40	0	0	0	0	0	0	0	0	0	0	0	0	0	0	0	0	0	0	0	0									40	0	0	0	0	0	0	0	0	0	0	0	0	0	0	0	0	0	0	0
	41	0	0	0	0	0	0	0	0	0	0	0	0	0	0	0	0	0	0	0	0									41	0	0	0	0	0	0	0	0	0	0	0	0	0	0	0	0	0	0	0
	42	0	0	0	0	0	0	0	0	0	0	0	0	0	0	0	0	0	0	0	0									42	0	0	0	0	0	0	0	0	0	0	0	0	0	0	0	0	0	0	0
	43	0	0	0	0	0	0	0	0	0	0	0	0	0	0	0	0	0	0	0	0									43	0	0	0	0	0	0	0	0	0	0	0	0	0	0	0	0	0	0	0
	44	0	0	0	0	0	0	0	0	0	0	0	0	0	0	0	0	0	0	0	0									44	0	0	0	0	0	0	0	0	0	0	0	0	0	0	0	0	0	0	0
	45	0	0	0	0	0	0	0	0	0	0	0	0	0	0	0	0	0	0	0	0									45	0	0	0	0	0	0	0	0	0	0	0	0	0	0	0	0	0	0	0
	46	0	0	0	0	0	0	0	0	0	0	0	0	0	0	0	0	0	0	0	0									46	0	0	0	0	0	0	0	0	0	0	0	0	0	0	0	0	0	0	0
	47	0	0	0	0	0	0	0	0	0	0	0	0	0	0	0	0	0	0	0	0									47	0	0	0	0	0	0	0	0	0	0	0	0	0	0	0	0	0	0	0
	48	0	0	0	0	0	0	0	0	0	0	0	0	0	0	0	0	0	0	0	0									48	0	0	0	0	0	0	0	0	0	0	0	0	0	0	0	0	0	0	0
	49	0	0	0	0	0	0	0	0	0	0	0	0	0	0	0	0	0	0	0	0									49	0	0	0	0	0	0	0	0	0	0	0	0	0	0	0	0	0	0	0
	50	0	0	0	0	0	0	0	0	0	0	0	0	0	0	0	0	0	0	0	0									50	0	0	0	0	0	0	0	0	0	0	0	0	0	0	0	0	0	0	0
	51	0	0	0	0	0	0	0	0	0	0	0	0	0	0	0	0	0	0	0	0									51	0	0	0	0	0	0	0	0	0	0	0	0	0	0	0	0	0	0	0
	52	0	0	0	0	0	0	0	0	0	0	0	0	0	0	0	0	0	0	0	0									52	0	0	0	0	0	0	0	0	0	0	0	0	0	0	0	0	0	0	0
	53	0	0	0	0	0	0	0	0	0	0	0	0	0	0	0	0	0	0	0	0									53	0	0	0	0	0	0	0	0	0	0	0	0	0	0	0	0	0	0	0
	54	0	0	0	0	0	0	0	0	0	0	0	0	0	0	0	0	0	0	0	0									54	0	0	0	0	0	0	0	0	0	0	0	0	0	0	0	0	0	0	0
	55	0	0	0	0	0	0	0	0	0	0	0	0	0	0	0	0	0	0	0	0									55	0	0	0	0	0	0	0	0	0	0	0	0	0	0	0	0	0	0	0
	56	0	0	0	0	0	0	0	0	0	0	0	0	0	0	0	0	0	0	0	0									56	0	0	0	0	0	0	0	0	0	0	0	0	0	0	0	0	0	0	0
	57	0	0	0	0	0	0	0	0	0	0	0	0	0	0	0	0	0	0	0	0									57	0	0	0	0	0	0	0	0	0	0	0	0	0	0	0	0	0	0	0
	58	0	0	0	0	0	0	0	0	0	0	0	0	0	0	0	0	0	0	0	0									58	0	0	0	0	0	0	0	0	0	0	0	0	0	0	0	0	0	0	0
	59	0	0	0	0	0	0	0	0	0	0	0	0	0	0	0	0	0	0	0	0									59	0	0	0	0	0	0	0	0	0	0	0	0	0	0	0	0	0	0	0
	60	0	0	0	0	0	0	0	0	0	0	0	0	0	0	0	0	0	0	0	0									60	0	0	0	0	0	0	0	0	0	0	0	0	0	0	0	0	0	0	0
	61	0	0	0	0	0	0	0	0	0	0	0	0	0	0	0	0	0	0	0	0									61	0	0	0	0	0	0	0	0	0	0	0	0	0	0	0	0	0	0	0
	62	0	0	0	0	0	0	0	0	0	0	0	0	0	0	0	0	0	0	0	0									62	0	0	0	0	0	0	0	0	0	0	0	0	0	0	0	0	0	0	0
	63	0	0	0	0	0	0	0	0	0	0	0	0	0	0	0	0	0	0	0	0									63	0	0	0	0	0	0	0	0	0	0	0	0	0	0	0	0	0	0	0
	64	0	0	0	0	0	0	0	0	0	0	0	0	0	0	0	0	0	0	0	0									64	0	0	0	0	0	0	0	0	0	0	0	0	0	0	0	0	0	0	0
	65	0	0	0	0	0	0	0	0	0	0	0	0	0	0	0	0	0	0	0	0									65	0	0	0	0	0	0	0	0	0	0	0	0	0	0	0	0	0	0	0
	66	0	0	0	0	0	0	0	0	0	0	0	0	0	0	0	0	0	0	0	0									66	0	0	0	0	0	0	0	0	0	0	0	0	0	0	0	0	0	0	0
	67	0	0	0	0	0	0	0	0	0	0	0	0	0	0	0	0	0	0	0	0									67	0	0	0	0	0	0	0	0	0	0	0	0	0	0	0	0	0	0	0
	68	0	0	0	0	0	0	0	0	0	0	0	0	0	0	0	0	0	0	0	0									68	0	0	0	0	0	0	0	0	0	0	0	0	0	0	0	0	0	0	0
	69	0	0	0	0	0	0	0	0	0	0	0	0	0	0	0	0	0	0	0	0									69	0	0	0	0	0	0	0	0	0	0	0	0	0	0	0	0	0	0	0
	70	0	0	0	0	0	0	0	0	0	0	0	0	0	0	0	0	0	0	0	0									70	0	0	0	0	0	0	0	0	0	0	0	0	0	0	0	0	0	0	0
	71	0	0	0	0	0	0	0	0	0	0	0	0	0	0	0	0	0	0	0	0									71	0	0	0	0	0	0	0	0	0	0	0	0	0	0	0	0	0	0	0
	72	0	0	0	0	0	0	0	0	0	0	0	0	0	0	0	0	0	0	0	0									72	0	0	0	0	0	0	0	0	0	0	0	0	0	0	0	0	0	0	0
	73	0	0	0	0	0	0	0	0	0	0	0	0	0	0	0	0	0	0	0	0									73	0	0	0	0	0	0	0	0	0	0	0	0	0	0	0	0	0	0	0
	74	0	0	0	0	0	0	0	0	0	0	0	0	0	0	0	0	0	0	0	0									74	0	0	0	0	0	0	0	0	0	0	0	0	0	0	0	0	0	0	0
	75	0	0	0	0	0	0	0	0	0	0	0	0	0	0	0	0	0	0	0	0									75	0	0	0	0	0	0	0	0	0	0	0	0	0	0	0	0	0	0	0
	76	0	0	0	0	0	0	0	0	0	0	0	0	0	0	0	0	0	0	0	0									76	0	0	0	0	0	0	0	0	0	0	0	0	0	0	0	0	0	0	0
	77	0	0	0	0	0	0	0	0	0	0	0	0	0	0	0	0	0	0	0	0									77	0	0	0	0	0	0	0	0	0	0	0	0	0	0	0	0	0	0	0
	78	0	0	0	0	0	0	0	0	0	0	0	0	0	0	0	0	0	0	0	0									78	0	0	0	0	0	0	0	0	0	0	0	0	0	0	0	0	0	0	0
	79	0	0	0	0	0	0	0	0	0	0	0	0	0	0	0	0	0	0	0	0									79	0	0	0	0	0	0	0	0	0	0	0	0	0	0	0	0	0	0	0
	80	0	0	0	0	0	0	0	0	0	0	0	0	0	0	0	0	0	0	0	0									80	0	0	0	0	0	0	0	0	0	0	0	0	0	0	0	0	0	0	0
	81	0	0	0	0	0	0	0	0	0	0	0	0	0	0	0	0	0	0	0	0									81	0	0	0	0	0	0	0	0	0	0	0	0	0	0	0	0	0	0	0
	82	0	0	0	0	0	0	0	0	0	0	0	0	0	0	0	0	0	0	0	0									82	0	0	0	0	0	0	0	0	0	0	0	0	0	0	0	0	0	0	0
	83	0	0	0	0	0	0	0	0	0	0	0	0	0	0	0	0	0	0	0	0									83	0	0	0	0	0	0	0	0	0	0	0	0	0	0	0	0	0	0	0
	84	0	0	0	0	0	0	0	0	0	0	0	0	0	0	0	0	0	0	0	0									84	0	0	0	0	0	0	0	0	0	0	0	0	0	0	0	0	0	0	0
	85	0	0	0	0	0	0	0	0	0	0	0	0	0	0	0	0	0	0	0	0									85	0	0	0	0	0	0	0	0	0	0	0	0	0	0	0	0	0	0	0
	86	0	0	0	0	0	0	0	0	0	0	0	0	0	0	0	0	0	0	0	0									86	0	0	0	0	0	0	0	0	0	0	0	0	0	0	0	0	0	0	0
	87	0	0	0	0	0	0	0	0	0	0	0	0	0	0	0	0	0	0	0	0									87	0	0	0	0	0	0	0	0	0	0	0	0	0	0	0	0	0	0	0
	88	0	0	0	0	0	0	0	0	0	0	0	0	0	0	0	0	0	0	0	0									88	0	0	0	0	0	0	0	0	0	0	0	0	0	0	0	0	0	0	0
	89	0	0	0	0	0	0	0	0	0	0	0	0	0	0	0	0	0	0	0	0									89	0	0	0	0	0	0	0	0	0	0	0	0	0	0	0	0	0	0	0
	90	0	0	0	0	0	0	0	0	0	0	0	0	0	0	0	0	0	0	0	0									90	0	0	0	0	0	0	0	0	0	0	0	0	0	0	0	0	0	0	0
	91	0	0	0	0	0	0	0	0	0	0	0	0	0	0	0	0	0	0	0	0									91	0	0	0	0	0	0	0	0	0	0	0	0	0	0	0	0	0	0	0
	92	0	0	0	0	0	0	0	0	0	0	0	0	0	0	0	0	0	0	0	0									92	0	0	0	0	0	0	0	0	0	0	0	0	0	0	0	0	0	0	0
	93	0	0	0	0	0	0	0	0	0	0	0	0	0	0	0	0	0	0	0	0									93	0	0	0	0	0	0	0	0	0	0	0	0	0	0	0	0	0	0	0
	94	0	0	0	0	0	0	0	0	0	0	0	0	0	0	0	0	0	0	0	0									94	0	0	0	0	0	0	0	0	0	0	0	0	0	0	0	0	0	0	0
	95	0	0	0	0	0	0	0	0	0	0	0	0	0	0	0	0	0	0	0	0									95	0	0	0	0	0	0	0	0	0	0	0	0	0	0	0	0	0	0	0
	96	0	0	0	0	0	0	0	0	0	0	0	0	0	0	0	0	0	0	0	0									96	0	0	0	0	0	0	0	0	0	0	0	0	0	0	0	0	0	0	0
	97	0	0	0	0	0	0	0	0	0	0	0	0	0	0	0	0	0	0	0	0									97	0	0	0	0	0	0	0	0	0	0	0	0	0	0	0	0	0	0	0
	98	0	0	0	0	0	0	0	0	0	0	0	0	0	0	0	0	0	0	0	0									98	0	0	0	0	0	0	0	0	0	0	0	0	0	0	0	0	0	0	0
	99	0	0	0	0	0	0	0	0	0	0	0	0	0	0	0	0	0	0	0	0									99	0	0	0	0	0	0	0	0	0	0	0	0	0	0	0	0	0	0	0
	100	0	0	0	0	0	0	0	0	0	0	0	0	0	0	0	0	0	0	0	0									100	0	0	0	0	0	0	0	0	0	0	0	0	0	0	0	0	0	0	0
	101	0	0	0	0	0	0	0	0	0	0	0	0	0	0	0	0	0	0	0	0									101	0	0	0	0	0	0	0	0	0	0	0	0	0	0	0	0	0	0	0
	102	0	0	0	0	0	0	0	0	0	0	0	0	0	0	0	0	0	0	0	0									102	0	0	0	0	0	0	0	0	0	0	0	0	0	0	0	0	0	0	0
	103	0	0	0	0	0	0	0	0	0	0	0	0	0	0	0	0	0	0	0	0									103	0	0	0	0	0	0	0	0	0	0	0	0	0	0	0	0	0	0	0
	104	0	0	0	0	0	0	0	0	0	0	0	0	0	0	0	0	0	0	0	0									104	0	0	0	0	0	0	0	0	0	0	0	0	0	0	0	0	0	0	0
	105	0	0	0	0	0	0	0	0	0	0	0	0	0	0	0	0	0	0	0	0									105	0	0	0	0	0	0	0	0	0	0	0	0	0	0	0	0	0	0	0
	106	0	0	0	0	0	0	0	0	0	0	0	0	0	0	0	0	0	0	0	0									106	0	0	0	0	0	0	0	0	0	0	0	0	0	0	0	0	0	0	0
	107	0	0	0	0	0	0	0	0	0	0	0	0	0	0	0	0	0	0	0	0									107	0	0	0	0	0	0	0	0	0	0	0	0	0	0	0	0	0	0	0
	108	0	0	0	0	0	0	0	0	0	0	0	0	0	0	0	0	0	0	0	0									108	0	0	0	0	0	0	0	0	0	0	0	0	0	0	0	0	0	0	0
	109	0	0	0	0	0	0	0	0	0	0	0	0	0	0	0	0	0	0	0	0									109	0	0	0	0	0	0	0	0	0	0	0	0	0	0	0	0	0	0	0
	110	0	0	0	0	0	0	0	0	0	0	0	0	0	0	0	0	0	0	0	0									110	0	0	0	0	0	0	0	0	0	0	0	0	0	0	0	0	0	0	0
	111	0	0	0	0	0	0	0	0	0	0	0	0	0	0	0	0	0	0	0	0									111	0	0	0	0	0	0	0	0	0	0	0	0	0	0	0	0	0	0	0
	112	0	0	0	0	0	0	0	0	0	0	0	0	0	0	0	0	0	0	0	0									112	0	0	0	0	0	0	0	0	0	0	0	0	0	0	0	0	0	0	0
	113	0	0	0	0	0	0	0	0	0	0	0	0	0	0	0	0	0	0	0	0									113	0	0	0	0	0	0	0	0	0	0	0	0	0	0	0	0	0	0	0
	114	0	0	0	0	0	0	0	0	0	0	0	0	0	0	0	0	0	0	0	0									114	0	0	0	0	0	0	0	0	0	0	0	0	0	0	0	0	0	0	0
	115	0	0	0	0	0	0	0	0	0	0	0	0	0	0	0	0	0	0	0	0									115	0	0	0	0	0	0	0	0	0	0	0	0	0	0	0	0	0	0	0
	116	0	0	0	0	0	0	0	0	0	0	0	0	0	0	0	0	0	0	0	0									116	0	0	0	0	0	0	0	0	0	0	0	0	0	0	0	0	0	0	0
	117	0	0	0	0	0	0	0	0	0	0	0	0	0	0	0	0	0	0	0	0									117	0	0	0	0	0	0	0	0	0	0	0	0	0	0	0	0	0	0	0
	118	0	0	0	0	0	0	0	0	0	0	0	0	0	0	0	0	0	0	0	0									118	0	0	0	0	0	0	0	0	0	0	0	0	0	0	0	0	0	0	0
	119	0	0	0	0	0	0	0	0	0	0	0	0	0	0	0	0	0	0	0	0									119	0	0	0	0	0	0	0	0	0	0	0	0	0	0	0	0	0	0	0
	120	0	0	0	0	0	0	0	0	0	0	0	0	0	0	0	0	0	0	0	0									120	0	0	0	0	0	0	0	0	0	0	0	0	0	0	0	0	0	0	0
	121	0	0	0	0	0	0	0	0	0	0	0	0	0	0	0	0	0	0	0	0									121	0	0	0	0	0	0	0	0	0	0	0	0	0	0	0	0	0	0	0
	122	0	0	0	0	0	0	0	0	0	0	0	0	0	0	0	0	0	0	0	0									122	0	0	0	0	0	0	0	0	0	0	0	0	0	0	0	0	0	0	0
	123	0	0	0	0	0	0	0	0	0	0	0	0	0	0	0	0	0	0	0	0									123	0	0	0	0	0	0	0	0	0	0	0	0	0	0	0	0	0	0	0
	124	0	0	0	0	0	0	0	0	0	0	0	0	0	0	0	0	0	0	0	0									124	0	0	0	0	0	0	0	0	0	0	0	0	0	0	0	0	0	0	0
	125	0	0	0	0	0	0	0	0	0	0	0	0	0	0	0	0	0	0	0	0									125	0	0	0	0	0	0	0	0	0	0	0	0	0	0	0	0	0	0	0
	126	0	0	0	0	0	0	0	0	0	0	0	0	0	0	0	0	0	0	0	0									126	0	0	0	0	0	0	0	0	0	0	0	0	0	0	0	0	0	0	0
	127	0	0	0	0	0	0	0	0	0	0	0	0	0	0	0	0	0	0	0	0									127	0	0	0	0	0	0	0	0	0	0	0	0	0	0	0	0	0	0	0
	128	0	0	0	0	0	0	0	0	0	0	0	0	0	0	0	0	0	0	0	0									128	0	0	0	0	0	0	0	0	0	0	0	0	0	0	0	0	0	0	0
	129	0	0	0	0	0	0	0	0	0	0	0	0	0	0	0	0	0	0	0	0									129	0	0	0	0	0	0	0	0	0	0	0	0	0	0	0	0	0	0	0
	130	0	0	0	0	0	0	0	0	0	0	0	0	0	0	0	0	0	0	0	0									130	0	0	0	0	0	0	0	0	0	0	0	0	0	0	0	0	0	0	0
	131	0	0	0	0	0	0	0	0	0	0	0	0	0	0	0	0	0	0	0	0									131	0	0	0	0	0	0	0	0	0	0	0	0	0	0	0	0	0	0	0
	132	0	0	0	0	0	0	0	0	0	0	0	0	0	0	0	0	0	0	0	0									132	0	0	0	0	0	0	0	0	0	0	0	0	0	0	0	0	0	0	0
	133	0	0	0	0	0	0	0	0	0	0	0	0	0	0	0	0	0	0	0	0									133	0	0	0	0	0	0	0	0	0	0	0	0	0	0	0	0	0	0	0
	134	0	0	0	0	0	0	0	0	0	0	0	0	0	0	0	0	0	0	0	0									134	0	0	0	0	0	0	0	0	0	0	0	0	0	0	0	0	0	0	0
	135	0	0	0	0	0	0	0	0	0	0	0	0	0	0	0	0	0	0	0	0									135	0	0	0	0	0	0	0	0	0	0	0	0	0	0	0	0	0	0	0
	136	0	0	0	0	0	0	0	0	0	0	0	0	0	0	0	0	0	0	0	0									136	0	0	0	0	0	0	0	0	0	0	0	0	0	0	0	0	0	0	0
	137	0	0	0	0	0	0	0	0	0	0	0	0	0	0	0	0	0	0	0	0									137	0	0	0	0	0	0	0	0	0	0	0	0	0	0	0	0	0	0	0
	138	0	0	0	0	0	0	0	0	0	0	0	0	0	0	0	0	0	0	0	0									138	0	0	0	0	0	0	0	0	0	0	0	0	0	0	0	0	0	0	0
	139	0	0	0	0	0	0	0	0	0	0	0	0	0	0	0	0	0	0	0	0									139	0	0	0	0	0	0	0	0	0	0	0	0	0	0	0	0	0	0	0
	140	0	0	0	0	0	0	0	0	0	0	0	0	0	0	0	0	0	0	0	0									140	0	0	0	0	0	0	0	0	0	0	0	0	0	0	0	0	0	0	0
	141	0	0	0	0	0	0	0	0	0	0	0	0	0	0	0	0	0	0	0	0									141	0	0	0	0	0	0	0	0	0	0	0	0	0	0	0	0	0	0	0
	142	0	0	0	0	0	0	0	0	0	0	0	0	0	0	0	0	0	0	0	0									142	0	0	0	0	0	0	0	0	0	0	0	0	0	0	0	0	0	0	0
	143	0	0	0	0	0	0	0	0	0	0	0	0	0	0	0	0	0	0	0	0									143	0	0	0	0	0	0	0	0	0	0	0	0	0	0	0	0	0	0	0
	144	0	0	0	0	0	0	0	0	0	0	0	0	0	0	0	0	0	0	0	0									144	0	0	0	0	0	0	0	0	0	0	0	0	0	0	0	0	0	0	0
	145	0	0	0	0	0	0	0	0	0	0	0	0	0	0	0	0	0	0	0	0									145	0	0	0	0	0	0	0	0	0	0	0	0	0	0	0	0	0	0	0
	146	0	0	0	0	0	0	0	0	0	0	0	0	0	0	0	0	0	0	0	0									146	0	0	0	0	0	0	0	0	0	0	0	0	0	0	0	0	0	0	0
	147	0	0	0	0	0	0	0	0	0	0	0	0	0	0	0	0	0	0	0	0									147	0	0	0	0	0	0	0	0	0	0	0	0	0	0	0	0	0	0	0
	148	0	0	0	0	0	0	0	0	0	0	0	0	0	0	0	0	0	0	0	0									148	0	0	0	0	0	0	0	0	0	0	0	0	0	0	0	0	0	0	0
	149	0	0	0	0	0	0	0	0	0	0	0	0	0	0	0	0	0	0	0	0									149	0	0	0	0	0	0	0	0	0	0	0	0	0	0	0	0	0	0	0
	150	0	0	0	0	0	0	0	0	0	0	0	0	0	0	0	0	0	0	0	0									150	0	0	0	0	0	0	0	0	0	0	0	0	0	0	0	0	0	0	0
	151	0	0	0	0	0	0	0	0	0	0	0	0	0	0	0	0	0	0	0	0									151	0	0	0	0	0	0	0	0	0	0	0	0	0	0	0	0	0	0	0
	152	0	0	0	0	0	0	0	0	0	0	0	0	0	0	0	0	0	0	0	0									152	0	0	0	0	0	0	0	0	0	0	0	0	0	0	0	0	0	0	0
	153	0	0	0	0	0	0	0	0	0	0	0	0	0	0	0	0	0	0	0	0									153	0	0	0	0	0	0	0	0	0	0	0	0	0	0	0	0	0	0	0
	154	0	0	0	0	0	0	0	0	0	0	0	0	0	0	0	0	0	0	0	0									154	0	0	0	0	0	0	0	0	0	0	0	0	0	0	0	0	0	0	0
	155	0	0	0	0	0	0	0	0	0	0	0	0	0	0	0	0	0	0	0	0									155	0	0	0	0	0	0	0	0	0	0	0	0	0	0	0	0	0	0	0
	156	0	0	0	0	0	0	0	0	0	0	0	0	0	0	0	0	0	0	0	0									156	0	0	0	0	0	0	0	0	0	0	0	0	0	0	0	0	0	0	0
	157	0	0	0	0	0	0	0	0	0	0	0	0	0	0	0	0	0	0	0	0									157	0	0	0	0	0	0	0	0	0	0	0	0	0	0	0	0	0	0	0
	158	0	0	0	0	0	0	0	0	0	0	0	0	0	0	0	0	0	0	0	0									158	0	0	0	0	0	0	0	0	0	0	0	0	0	0	0	0	0	0	0
	159	0	0	0	0	0	0	0	0	0	0	0	0	0	0	0	0	0	0	0	0									159	0	0	0	0	0	0	0	0	0	0	0	0	0	0	0	0	0	0	0
	160	0	0	0	0	0	0	0	0	0	0	0	0	0	0	0	0	0	0	0	0									160	0	0	0	0	0	0	0	0	0	0	0	0	0	0	0	0	0	0	0
	161	0	0	0	0	0	0	0	0	0	0	0	0	0	0	0	0	0	0	0	0									161	0	0	0	0	0	0	0	0	0	0	0	0	0	0	0	0	0	0	0
	162	0	0	0	0	0	0	0	0	0	0	0	0	0	0	0	0	0	0	0	0									162	0	0	0	0	0	0	0	0	0	0	0	0	0	0	0	0	0	0	0
	163	0	0	0	0	0	0	0	0	0	0	0	0	0	0	0	0	0	0	0	0									163	0	0	0	0	0	0	0	0	0	0	0	0	0	0	0	0	0	0	0
	164	0	0	0	0	0	0	0	0	0	0	0	0	0	0	0	0	0	0	0	0									164	0	0	0	0	0	0	0	0	0	0	0	0	0	0	0	0	0	0	0
	165	0	0	0	0	0	0	0	0	0	0	0	0	0	0	0	0	0	0	0	0									165	0	0	0	0	0	0	0	0	0	0	0	0	0	0	0	0	0	0	0
	166	0	0	0	0	0	0	0	0	0	0	0	0	0	0	0	0	0	0	0	0									166	0	0	0	0	0	0	0	0	0	0	0	0	0	0	0	0	0	0	0
	167	0	0	0	0	0	0	0	0	0	0	0	0	0	0	0	0	0	0	0	0									167	0	0	0	0	0	0	0	0	0	0	0	0	0	0	0	0	0	0	0
	168	0	0	0	0	0	0	0	0	0	0	0	0	0	0	0	0	0	0	0	0									168	0	0	0	0	0	0	0	0	0	0	0	0	0	0	0	0	0	0	0
	169	0	0	0	0	0	0	0	0	0	0	0	0	0	0	0	0	0	0	0	0									169	0	0	0	0	0	0	0	0	0	0	0	0	0	0	0	0	0	0	0
	170	0	0	0	0	0	0	0	0	0	0	0	0	0	0	0	0	0	0	0	0									170	0	0	0	0	0	0	0	0	0	0	0	0	0	0	0	0	0	0	0
	171	0	0	0	0	0	0	0	0	0	0	0	0	0	0	0	0	0	0	0	0									171	0	0	0	0	0	0	0	0	0	0	0	0	0	0	0	0	0	0	0
	172	0	0	0	0	0	0	0	0	0	0	0	0	0	0	0	0	0	0	0	0									172	0	0	0	0	0	0	0	0	0	0	0	0	0	0	0	0	0	0	0
	173	0	0	0	0	0	0	0	0	0	0	0	0	0	0	0	0	0	0	0	0									173	0	0	0	0	0	0	0	0	0	0	0	0	0	0	0	0	0	0	0
	174	0	0	0	0	0	0	0	0	0	0	0	0	0	0	0	0	0	0	0	0									174	0	0	0	0	0	0	0	0	0	0	0	0	0	0	0	0	0	0	0
	175	0	0	0	0	0	0	0	0	0	0	0	0	0	0	0	0	0	0	0	0									175	0	0	0	0	0	0	0	0	0	0	0	0	0	0	0	0	0	0	0
	176	0	0	0	0	0	0	0	0	0	0	0	0	0	0	0	0	0	0	0	0									176	0	0	0	0	0	0	0	0	0	0	0	0	0	0	0	0	0	0	0
	177	0	0	0	0	0	0	0	0	0	0	0	0	0	0	0	0	0	0	0	0									177	0	0	0	0	0	0	0	0	0	0	0	0	0	0	0	0	0	0	0
	178	0	0	0	0	0	0	0	0	0	0	0	0	0	0	0	0	0	0	0	0									178	0	0	0	0	0	0	0	0	0	0	0	0	0	0	0	0	0	0	0
	179	0	0	0	0	0	0	0	0	0	0	0	0	0	0	0	0	0	0	0	0									179	0	0	0	0	0	0	0	0	0	0	0	0	0	0	0	0	0	0	0
	180	0	0	0	0	0	0	0	0	0	0	0	0	0	0	0	0	0	0	0	0									180	0	0	0	0	0	0	0	0	0	0	0	0	0	0	0	0	0	0	0
	181	0	0	0	0	0	0	0	0	0	0	0	0	0	0	0	0	0	0	0	0									181	0	0	0	0	0	0	0	0	0	0	0	0	0	0	0	0	0	0	0
	182	0	0	0	0	0	0	0	0	0	0	0	0	0	0	0	0	0	0	0	0									182	0	0	0	0	0	0	0	0	0	0	0	0	0	0	0	0	0	0	0
	183	0	0	0	0	0	0	0	0	0	0	0	0	0	0	0	0	0	0	0	0									183	0	0	0	0	0	0	0	0	0	0	0	0	0	0	0	0	0	0	0
	184	0	0	0	0	0	0	0	0	0	0	0	0	0	0	0	0	0	0	0	0									184	0	0	0	0	0	0	0	0	0	0	0	0	0	0	0	0	0	0	0
	185	0	0	0	0	0	0	0	0	0	0	0	0	0	0	0	0	0	0	0	0									185	0	0	0	0	0	0	0	0	0	0	0	0	0	0	0	0	0	0	0
	186	0	0	0	0	0	0	0	0	0	0	0	0	0	0	0	0	0	0	0	0									186	0	0	0	0	0	0	0	0	0	0	0	0	0	0	0	0	0	0	0
	187	0	0	0	0	0	0	0	0	0	0	0	0	0	0	0	0	0	0	0	0									187	0	0	0	0	0	0	0	0	0	0	0	0	0	0	0	0	0	0	0
	188	0	0	0	0	0	0	0	0	0	0	0	0	0	0	0	0	0	0	0	0									188	0	0	0	0	0	0	0	0	0	0	0	0	0	0	0	0	0	0	0
	189	0	0	0	0	0	0	0	0	0	0	0	0	0	0	0	0	0	0	0	0									189	0	0	0	0	0	0	0	0	0	0	0	0	0	0	0	0	0	0	0
	190	0	0	0	0	0	0	0	0	0	0	0	0	0	0	0	0	0	0	0	0									190	0	0	0	0	0	0	0	0	0	0	0	0	0	0	0	0	0	0	0
	191	0	0	0	0	0	0	0	0	0	0	0	0	0	0	0	0	0	0	0	0									191	0	0	0	0	0	0	0	0	0	0	0	0	0	0	0	0	0	0	0
	192	0	0	0	0	0	0	0	0	0	0	0	0	0	0	0	0	0	0	0	0									192	0	0	0	0	0	0	0	0	0	0	0	0	0	0	0	0	0	0	0
	193	0	0	0	0	0	0	0	0	0	0	0	0	0	0	0	0	0	0	0	0									193	0	0	0	0	0	0	0	0	0	0	0	0	0	0	0	0	0	0	0
	194	0	0	0	0	0	0	0	0	0	0	0	0	0	0	0	0	0	0	0	0									194	0	0	0	0	0	0	0	0	0	0	0	0	0	0	0	0	0	0	0
	195	0	0	0	0	0	0	0	0	0	0	0	0	0	0	0	0	0	0	0	0									195	0	0	0	0	0	0	0	0	0	0	0	0	0	0	0	0	0	0	0
	196	0	0	0	0	0	0	0	0	0	0	0	0	0	0	0	0	0	0	0	0									196	0	0	0	0	0	0	0	0	0	0	0	0	0	0	0	0	0	0	0
	197	0	0	0	0	0	0	0	0	0	0	0	0	0	0	0	0	0	0	0	0									197	0	0	0	0	0	0	0	0	0	0	0	0	0	0	0	0	0	0	0
	198	0	0	0	0	0	0	0	0	0	0	0	0	0	0	0	0	0	0	0	0									198	0	0	0	0	0	0	0	0	0	0	0	0	0	0	0	0	0	0	0
	199	0	0	0	0	0	0	0	0	0	0	0	0	0	0	0	0	0	0	0	0									199	0	0	0	0	0	0	0	0	0	0	0	0	0	0	0	0	0	0	0
	200	0	0	0	0	0	0	0	0	0	0	0	0	0	0	0	0	0	0	0	0									200	0	0	0	0	0	0	0	0	0	0	0	0	0	0	0	0	0	0	0
	201	0	0	0	0	0	0	0	0	0	0	0	0	0	0	0	0	0	0	0	0									201	0	0	0	0	0	0	0	0	0	0	0	0	0	0	0	0	0	0	0
	202	0	0	0	0	0	0	0	0	0	0	0	0	0	0	0	0	0	0	0	0									202	0	0	0	0	0	0	0	0	0	0	0	0	0	0	0	0	0	0	0
	203	0	0	0	0	0	0	0	0	0	0	0	0	0	0	0	0	0	0	0	0									203	0	0	0	0	0	0	0	0	0	0	0	0	0	0	0	0	0	0	0
	204	0	0	0	0	0	0	0	0	0	0	0	0	0	0	0	0	0	0	0	0									204	0	0	0	0	0	0	0	0	0	0	0	0	0	0	0	0	0	0	0
	205	0	0	0	0	0	0	0	0	0	0	0	0	0	0	0	0	0	0	0	0									205	0	0	0	0	0	0	0	0	0	0	0	0	0	0	0	0	0	0	0
	206	0	0	0	0	0	0	0	0	0	0	0	0	0	0	0	0	0	0	0	0									206	0	0	0	0	0	0	0	0	0	0	0	0	0	0	0	0	0	0	0
	207	0	0	0	0	0	0	0	0	0	0	0	0	0	0	0	0	0	0	0	0									207	0	0	0	0	0	0	0	0	0	0	0	0	0	0	0	0	0	0	0
	208	0	0	0	0	0	0	0	0	0	0	0	0	0	0	0	0	0	0	0	0									208	0	0	0	0	0	0	0	0	0	0	0	0	0	0	0	0	0	0	0
	209	0	0	0	0	0	0	0	0	0	0	0	0	0	0	0	0	0	0	0	0									209	0	0	0	0	0	0	0	0	0	0	0	0	0	0	0	0	0	0	0
	210	0	0	0	0	0	0	0	0	0	0	0	0	0	0	0	0	0	0	0	0									210	0	0	0	0	0	0	0	0	0	0	0	0	0	0	0	0	0	0	0
	211	0	0	0	0	0	0	0	0	0	0	0	0	0	0	0	0	0	0	0	0									211	0	0	0	0	0	0	0	0	0	0	0	0	0	0	0	0	0	0	0
	212	0	0	0	0	0	0	0	0	0	0	0	0	0	0	0	0	0	0	0	0									212	0	0	0	0	0	0	0	0	0	0	0	0	0	0	0	0	0	0	0
	213	0	0	0	0	0	0	0	0	0	0	0	0	0	0	0	0	0	0	0	0									213	0	0	0	0	0	0	0	0	0	0	0	0	0	0	0	0	0	0	0
	214	0	0	0	0	0	0	0	0	0	0	0	0	0	0	0	0	0	0	0	0									214	0	0	0	0	0	0	0	0	0	0	0	0	0	0	0	0	0	0	0
	215	0	0	0	0	0	0	0	0	0	0	0	0	0	0	0	0	0	0	0	0									215	0	0	0	0	0	0	0	0	0	0	0	0	0	0	0	0	0	0	0
	216	0	0	0	0	0	0	0	0	0	0	0	0	0	0	0	0	0	0	0	0									216	0	0	0	0	0	0	0	0	0	0	0	0	0	0	0	0	0	0	0
	217	0	0	0	0	0	0	0	0	0	0	0	0	0	0	0	0	0	0	0	0									217	0	0	0	0	0	0	0	0	0	0	0	0	0	0	0	0	0	0	0
	218	0	0	0	0	0	0	0	0	0	0	0	0	0	0	0	0	0	0	0	0									218	0	0	0	0	0	0	0	0	0	0	0	0	0	0	0	0	0	0	0
	219	0	0	0	0	0	0	0	0	0	0	0	0	0	0	0	0	0	0	0	0									219	0	0	0	0	0	0	0	0	0	0	0	0	0	0	0	0	0	0	0
	220	0	0	0	0	0	0	0	0	0	0	0	0	0	0	0	0	0	0	0	0									220	0	0	0	0	0	0	0	0	0	0	0	0	0	0	0	0	0	0	0
	221	0	0	0	0	0	0	0	0	0	0	0	0	0	0	0	0	0	0	0	0									221	0	0	0	0	0	0	0	0	0	0	0	0	0	0	0	0	0	0	0
	222	0	0	0	0	0	0	0	0	0	0	0	0	0	0	0	0	0	0	0	0									222	0	0	0	0	0	0	0	0	0	0	0	0	0	0	0	0	0	0	0
	223	0	0	0	0	0	0	0	0	0	0	0	0	0	0	0	0	0	0	0	0									223	0	0	0	0	0	0	0	0	0	0	0	0	0	0	0	0	0	0	0
	224	0	0	0	0	0	0	0	0	0	0	0	0	0	0	0	0	0	0	0	0									224	0	0	0	0	0	0	0	0	0	0	0	0	0	0	0	0	0	0	0
	225	0	0	0	0	0	0	0	0	0	0	0	0	0	0	0	0	0	0	0	0									225	0	0	0	0	0	0	0	0	0	0	0	0	0	0	0	0	0	0	0
	226	0	0	0	0	0	0	0	0	0	0	0	0	0	0	0	0	0	0	0	0									226	0	0	0	0	0	0	0	0	0	0	0	0	0	0	0	0	0	0	0
	227	0	0	0	0	0	0	0	0	0	0	0	0	0	0	0	0	0	0	0	0									227	0	0	0	0	0	0	0	0	0	0	0	0	0	0	0	0	0	0	0
	228	0	0	0	0	0	0	0	0	0	0	0	0	0	0	0	0	0	0	0	0									228	0	0	0	0	0	0	0	0	0	0	0	0	0	0	0	0	0	0	0
	229	0	0	0	0	0	0	0	0	0	0	0	0	0	0	0	0	0	0	0	0									229	0	0	0	0	0	0	0	0	0	0	0	0	0	0	0	0	0	0	0
	230	0	0	0	0	0	0	0	0	0	0	0	0	0	0	0	0	0	0	0	0									230	0	0	0	0	0	0	0	0	0	0	0	0	0	0	0	0	0	0	0
	231	0	0	0	0	0	0	0	0	0	0	0	0	0	0	0	0	0	0	0	0									231	0	0	0	0	0	0	0	0	0	0	0	0	0	0	0	0	0	0	0
	232	0	0	0	0	0	0	0	0	0	0	0	0	0	0	0	0	0	0	0	0									232	0	0	0	0	0	0	0	0	0	0	0	0	0	0	0	0	0	0	0
	233	0	0	0	0	0	0	0	0	0	0	0	0	0	0	0	0	0	0	0	0									233	0	0	0	0	0	0	0	0	0	0	0	0	0	0	0	0	0	0	0
	234	0	0	0	0	0	0	0	0	0	0	0	0	0	0	0	0	0	0	0	0									234	0	0	0	0	0	0	0	0	0	0	0	0	0	0	0	0	0	0	0
	235	0	0	0	0	0	0	0	0	0	0	0	0	0	0	0	0	0	0	0	0									235	0	0	0	0	0	0	0	0	0	0	0	0	0	0	0	0	0	0	0
	236	0	0	0	0	0	0	0	0	0	0	0	0	0	0	0	0	0	0	0	0									236	0	0	0	0	0	0	0	0	0	0	0	0	0	0	0	0	0	0	0
	237	0	0	0	0	0	0	0	0	0	0	0	0	0	0	0	0	0	0	0	0									237	0	0	0	0	0	0	0	0	0	0	0	0	0	0	0	0	0	0	0
	238	0	0	0	0	0	0	0	0	0	0	0	0	0	0	0	0	0	0	0	0									238	0	0	0	0	0	0	0	0	0	0	0	0	0	0	0	0	0	0	0
	239	0	0	0	0	0	0	0	0	0	0	0	0	0	0	0	0	0	0	0	0									239	0	0	0	0	0	0	0	0	0	0	0	0	0	0	0	0	0	0	0
	240	0	0	0	0	0	0	0	0	0	0	0	0	0	0	0	0	0	0	0	0									240	0	0	0	0	0	0	0	0	0	0	0	0	0	0	0	0	0	0	0
	241	0	0	0	0	0	0	0	0	0	0	0	0	0	0	0	0	0	0	0	0									241	0	0	0	0	0	0	0	0	0	0	0	0	0	0	0	0	0	0	0
	242	0	0	0	0	0	0	0	0	0	0	0	0	0	0	0	0	0	0	0	0									242	0	0	0	0	0	0	0	0	0	0	0	0	0	0	0	0	0	0	0
	243	0	0	0	0	0	0	0	0	0	0	0	0	0	0	0	0	0	0	0	0									243	0	0	0	0	0	0	0	0	0	0	0	0	0	0	0	0	0	0	0
	244	0	0	0	0	0	0	0	0	0	0	0	0	0	0	0	0	0	0	0	0									244	0	0	0	0	0	0	0	0	0	0	0	0	0	0	0	0	0	0	0
	245	0	0	0	0	0	0	0	0	0	0	0	0	0	0	0	0	0	0	0	0									245	0	0	0	0	0	0	0	0	0	0	0	0	0	0	0	0	0	0	0
	246	0	0	0	0	0	0	0	0	0	0	0	0	0	0	0	0	0	0	0	0									246	0	0	0	0	0	0	0	0	0	0	0	0	0	0	0	0	0	0	0
	247	0	0	0	0	0	0	0	0	0	0	0	0	0	0	0	0	0	0	0	0									247	0	0	0	0	0	0	0	0	0	0	0	0	0	0	0	0	0	0	0
	248	0	0	0	0	0	0	0	0	0	0	0	0	0	0	0	0	0	0	0	0									248	0	0	0	0	0	0	0	0	0	0	0	0	0	0	0	0	0	0	0
	249	0	0	0	0	0	0	0	0	0	0	0	0	0	0	0	0	0	0	0	0									249	0	0	0	0	0	0	0	0	0	0	0	0	0	0	0	0	0	0	0
	250	0	0	0	0	0	0	0	0	0	0	0	0	0	0	0	0	0	0	0	0									250	0	0	0	0	0	0	0	0	0	0	0	0	0	0	0	0	0	0	0
	251	0	0	0	0	0	0	0	0	0	0	0	0	0	0	0	0	0	0	0	0									251	0	0	0	0	0	0	0	0	0	0	0	0	0	0	0	0	0	0	0
	252	0	0	0	0	0	0	0	0	0	0	0	0	0	0	0	0	0	0	0	0									252	0	0	0	0	0	0	0	0	0	0	0	0	0	0	0	0	0	0	0
	253	0	0	0	0	0	0	0	0	0	0	0	0	0	0	0	0	0	0	0	0									253	0	0	0	0	0	0	0	0	0	0	0	0	0	0	0	0	0	0	0
	254	0	0	0	0	0	0	0	0	0	0	0	0	0	0	0	0	0	0	0	0									254	0	0	0	0	0	0	0	0	0	0	0	0	0	0	0	0	0	0	0
	255	0	0	0	0	0	0	0	0	0	0	0	0	0	0	0	0	0	0	0	0									255	0	0	0	0	0	0	0	0	0	0	0	0	0	0	0	0	0	0	0
	256	0	0	0	0	0	0	0	0	0	0	0	0	0	0	0	0	0	0	0	0									256	0	0	0	0	0	0	0	0	0	0	0	0	0	0	0	0	0	0	0
	257	0	0	0	0	0	0	0	0	0	0	0	0	0	0	0	0	0	0	0	0									257	0	0	0	0	0	0	0	0	0	0	0	0	0	0	0	0	0	0	0
	258	0	0	0	0	0	0	0	0	0	0	0	0	0	0	0	0	0	0	0	0									258	0	0	0	0	0	0	0	0	0	0	0	0	0	0	0	0	0	0	0
	259	0	0	0	0	0	0	0	0	0	0	0	0	0	0	0	0	0	0	0	0									259	0	0	0	0	0	0	0	0	0	0	0	0	0	0	0	0	0	0	0
	260	0	0	0	0	0	0	0	0	0	0	0	0	0	0	0	0	0	0	0	0									260	0	0	0	0	0	0	0	0	0	0	0	0	0	0	0	0	0	0	0
	261	0	0	0	0	0	0	0	0	0	0	0	0	0	0	0	0	0	0	0	0									261	0	0	0	0	0	0	0	0	0	0	0	0	0	0	0	0	0	0	0
	262	0	0	0	0	0	0	0	0	0	0	0	0	0	0	0	0	0	0	0	0									262	0	0	0	0	0	0	0	0	0	0	0	0	0	0	0	0	0	0	0
	263	0	0	0	0	0	0	0	0	0	0	0	0	0	0	0	0	0	0	0	0									263	0	0	0	0	0	0	0	0	0	0	0	0	0	0	0	0	0	0	0
	264	0	0	0	0	0	0	0	0	0	0	0	0	0	0	0	0	0	0	0	0									264	0	0	0	0	0	0	0	0	0	0	0	0	0	0	0	0	0	0	0
	265	0	0	0	0	0	0	0	0	0	0	0	0	0	0	0	0	0	0	0	0									265	0	0	0	0	0	0	0	0	0	0	0	0	0	0	0	0	0	0	0
	266	0	0	0	0	0	0	0	0	0	0	0	0	0	0	0	0	0	0	0	0									266	0	0	0	0	0	0	0	0	0	0	0	0	0	0	0	0	0	0	0
	267	0	0	0	0	0	0	0	0	0	0	0	0	0	0	0	0	0	0	0	0									267	0	0	0	0	0	0	0	0	0	0	0	0	0	0	0	0	0	0	0
	268	0	0	0	0	0	0	0	0	0	0	0	0	0	0	0	0	0	0	0	0									268	0	0	0	0	0	0	0	0	0	0	0	0	0	0	0	0	0	0	0
	269	0	0	0	0	0	0	0	0	0	0	0	0	0	0	0	0	0	0	0	0									269	0	0	0	0	0	0	0	0	0	0	0	0	0	0	0	0	0	0	0
	270	0	0	0	0	0	0	0	0	0	0	0	0	0	0	0	0	0	0	0	0									270	0	0	0	0	0	0	0	0	0	0	0	0	0	0	0	0	0	0	0
	271	0	0	0	0	0	0	0	0	0	0	0	0	0	0	0	0	0	0	0	0									271	0	0	0	0	0	0	0	0	0	0	0	0	0	0	0	0	0	0	0
	272	0	0	0	0	0	0	0	0	0	0	0	0	0	0	0	0	0	0	0	0									272	0	0	0	0	0	0	0	0	0	0	0	0	0	0	0	0	0	0	0
	273	0	0	0	0	0	0	0	0	0	0	0	0	0	0	0	0	0	0	0	0									273	0	0	0	0	0	0	0	0	0	0	0	0	0	0	0	0	0	0	0
	274	0	0	0	0	0	0	0	0	0	0	0	0	0	0	0	0	0	0	0	0									274	0	0	0	0	0	0	0	0	0	0	0	0	0	0	0	0	0	0	0
	275	0	0	0	0	0	0	0	0	0	0	0	0	0	0	0	0	0	0	0	0									275	0	0	0	0	0	0	0	0	0	0	0	0	0	0	0	0	0	0	0
	276	0	0	0	0	0	0	0	0	0	0	0	0	0	0	0	0	0	0	0	0									276	0	0	0	0	0	0	0	0	0	0	0	0	0	0	0	0	0	0	0
	277	0	0	0	0	0	0	0	0	0	0	0	0	0	0	0	0	0	0	0	0									277	0	0	0	0	0	0	0	0	0	0	0	0	0	0	0	0	0	0	0
	278	0	0	0	0	0	0	0	0	0	0	0	0	0	0	0	0	0	0	0	0									278	0	0	0	0	0	0	0	0	0	0	0	0	0	0	0	0	0	0	0
	279	0	0	0	0	0	0	0	0	0	0	0	0	0	0	0	0	0	0	0	0									279	0	0	0	0	0	0	0	0	0	0	0	0	0	0	0	0	0	0	0
	280	0	0	0	0	0	0	0	0	0	0	0	0	0	0	0	0	0	0	0	0									280	0	0	0	0	0	0	0	0	0	0	0	0	0	0	0	0	0	0	0
	281	0	0	0	0	0	0	0	0	0	0	0	0	0	0	0	0	0	0	0	0									281	0	0	0	0	0	0	0	0	0	0	0	0	0	0	0	0	0	0	0
	282	0	0	0	0	0	0	0	0	0	0	0	0	0	0	0	0	0	0	0	0									282	0	0	0	0	0	0	0	0	0	0	0	0	0	0	0	0	0	0	0
	283	0	0	0	0	0	0	0	0	0	0	0	0	0	0	0	0	0	0	0	0									283	0	0	0	0	0	0	0	0	0	0	0	0	0	0	0	0	0	0	0
	284	0	0	0	0	0	0	0	0	0	0	0	0	0	0	0	0	0	0	0	0									284	0	0	0	0	0	0	0	0	0	0	0	0	0	0	0	0	0	0	0
	285	0	0	0	0	0	0	0	0	0	0	0	0	0	0	0	0	0	0	0	0									285	0	0	0	0	0	0	0	0	0	0	0	0	0	0	0	0	0	0	0
	286	0	0	0	0	0	0	0	0	0	0	0	0	0	0	0	0	0	0	0	0									286	0	0	0	0	0	0	0	0	0	0	0	0	0	0	0	0	0	0	0
	287	0	0	0	0	0	0	0	0	0	0	0	0	0	0	0	0	0	0	0	0									287	0	0	0	0	0	0	0	0	0	0	0	0	0	0	0	0	0	0	0
	288	0	0	0	0	0	0	0	0	0	0	0	0	0	0	0	0	0	0	0	0									288	0	0	0	0	0	0	0	0	0	0	0	0	0	0	0	0	0	0	0
	289	0	0	0	0	0	0	0	0	0	0	0	0	0	0	0	0	0	0	0	0									289	0	0	0	0	0	0	0	0	0	0	0	0	0	0	0	0	0	0	0
	290	0	0	0	0	0	0	0	0	0	0	0	0	0	0	0	0	0	0	0	0									290	0	0	0	0	0	0	0	0	0	0	0	0	0	0	0	0	0	0	0
	291	0	0	0	0	0	0	0	0	0	0	0	0	0	0	0	0	0	0	0	0									291	0	0	0	0	0	0	0	0	0	0	0	0	0	0	0	0	0	0	0
	292	0	0	0	0	0	0	0	0	0	0	0	0	0	0	0	0	0	0	0	0									292	0	0	0	0	0	0	0	0	0	0	0	0	0	0	0	0	0	0	0
	293	0	0	0	0	0	0	0	0	0	0	0	0	0	0	0	0	0	0	0	0									293	0	0	0	0	0	0	0	0	0	0	0	0	0	0	0	0	0	0	0
	294	0	0	0	0	0	0	0	0	0	0	0	0	0	0	0	0	0	0	0	0									294	0	0	0	0	0	0	0	0	0	0	0	0	0	0	0	0	0	0	0
	295	0	0	0	0	0	0	0	0	0	0	0	0	0	0	0	0	0	0	0	0									295	0	0	0	0	0	0	0	0	0	0	0	0	0	0	0	0	0	0	0
	296	0	0	0	0	0	0	0	0	0	0	0	0	0	0	0	0	0	0	0	0									296	0	0	0	0	0	0	0	0	0	0	0	0	0	0	0	0	0	0	0
	297	0	0	0	0	0	0	0	0	0	0	0	0	0	0	0	0	0	0	0	0									297	0	0	0	0	0	0	0	0	0	0	0	0	0	0	0	0	0	0	0
	298	0	0	0	0	0	0	0	0	0	0	0	0	0	0	0	0	0	0	0	0									298	0	0	0	0	0	0	0	0	0	0	0	0	0	0	0	0	0	0	0
	299	0	0	0	0	0	0	0	0	0	0	0	0	0	0	0	0	0	0	0	0									299	0	0	0	0	0	0	0	0	0	0	0	0	0	0	0	0	0	0	0
	300	0	0	0	0	0	0	0	0	0	0	0	0	0	0	0	0	0	0	0	0									300	0	0	0	0	0	0	0	0	0	0	0	0	0	0	0	0	0	0	0
	301	0	0	0	0	0	0	0	0	0	0	0	0	0	0	0	0	0	0	0	0									301	0	0	0	0	0	0	0	0	0	0	0	0	0	0	0	0	0	0	0
	302	0	0	0	0	0	0	0	0	0	0	0	0	0	0	0	0	0	0	0	0									302	0	0	0	0	0	0	0	0	0	0	0	0	0	0	0	0	0	0	0
	303	0	0	0	0	0	0	0	0	0	0	0	0	0	0	0	0	0	0	0	0									303	0	0	0	0	0	0	0	0	0	0	0	0	0	0	0	0	0	0	0
	304	0	0	0	0	0	0	0	0	0	0	0	0	0	0	0	0	0	0	0	0									304	0	0	0	0	0	0	0	0	0	0	0	0	0	0	0	0	0	0	0
	305	0	0	0	0	0	0	0	0	0	0	0	0	0	0	0	0	0	0	0	0									305	0	0	0	0	0	0	0	0	0	0	0	0	0	0	0	0	0	0	0
	306	0	0	0	0	0	0	0	0	0	0	0	0	0	0	0	0	0	0	0	0									306	0	0	0	0	0	0	0	0	0	0	0	0	0	0	0	0	0	0	0
	307	0	0	0	0	0	0	0	0	0	0	0	0	0	0	0	0	0	0	0	0									307	0	0	0	0	0	0	0	0	0	0	0	0	0	0	0	0	0	0	0
	308	0	0	0	0	0	0	0	0	0	0	0	0	0	0	0	0	0	0	0	0									308	0	0	0	0	0	0	0	0	0	0	0	0	0	0	0	0	0	0	0
	309	0	0	0	0	0	0	0	0	0	0	0	0	0	0	0	0	0	0	0	0									309	0	0	0	0	0	0	0	0	0	0	0	0	0	0	0	0	0	0	0
	310	0	0	0	0	0	0	0	0	0	0	0	0	0	0	0	0	0	0	0	0									310	0	0	0	0	0	0	0	0	0	0	0	0	0	0	0	0	0	0	0
	311	0	0	0	0	0	0	0	0	0	0	0	0	0	0	0	0	0	0	0	0									311	0	0	0	0	0	0	0	0	0	0	0	0	0	0	0	0	0	0	0
	312	0	0	0	0	0	0	0	0	0	0	0	0	0	0	0	0	0	0	0	0									312	0	0	0	0	0	0	0	0	0	0	0	0	0	0	0	0	0	0	0
	313	0	0	0	0	0	0	0	0	0	0	0	0	0	0	0	0	0	0	0	0									313	0	0	0	0	0	0	0	0	0	0	0	0	0	0	0	0	0	0	0
	314	0	0	0	0	0	0	0	0	0	0	0	0	0	0	0	0	0	0	0	0									314	0	0	0	0	0	0	0	0	0	0	0	0	0	0	0	0	0	0	0
	315	0	0	0	0	0	0	0	0	0	0	0	0	0	0	0	0	0	0	0	0									315	0	0	0	0	0	0	0	0	0	0	0	0	0	0	0	0	0	0	0
	316	0	0	0	0	0	0	0	0	0	0	0	0	0	0	0	0	0	0	0	0									316	0	0	0	0	0	0	0	0	0	0	0	0	0	0	0	0	0	0	0
	317	0	0	0	0	0	0	0	0	0	0	0	0	0	0	0	0	0	0	0	0									317	0	0	0	0	0	0	0	0	0	0	0	0	0	0	0	0	0	0	0
	318	0	0	0	0	0	0	0	0	0	0	0	0	0	0	0	0	0	0	0	0									318	0	0	0	0	0	0	0	0	0	0	0	0	0	0	0	0	0	0	0
	319	0	0	0	0	0	0	0	0	0	0	0	0	0	0	0	0	0	0	0	0									319	0	0	0	0	0	0	0	0	0	0	0	0	0	0	0	0	0	0	0
	320	0	0	0	0	0	0	0	0	0	0	0	0	0	0	0	0	0	0	0	0									320	0	0	0	0	0	0	0	0	0	0	0	0	0	0	0	0	0	0	0
	321	0	0	0	0	0	0	0	0	0	0	0	0	0	0	0	0	0	0	0	0									321	0	0	0	0	0	0	0	0	0	0	0	0	0	0	0	0	0	0	0
	322	0	0	0	0	0	0	0	0	0	0	0	0	0	0	0	0	0	0	0	0									322	0	0	0	0	0	0	0	0	0	0	0	0	0	0	0	0	0	0	0
	323	0	0	0	0	0	0	0	0	0	0	0	0	0	0	0	0	0	0	0	0									323	0	0	0	0	0	0	0	0	0	0	0	0	0	0	0	0	0	0	0
	324	0	0	0	0	0	0	0	0	0	0	0	0	0	0	0	0	0	0	0	0									324	0	0	0	0	0	0	0	0	0	0	0	0	0	0	0	0	0	0	0
	325	0	0	0	0	0	0	0	0	0	0	0	0	0	0	0	0	0	0	0	0									325	0	0	0	0	0	0	0	0	0	0	0	0	0	0	0	0	0	0	0
	326	0	0	0	0	0	0	0	0	0	0	0	0	0	0	0	0	0	0	0	0									326	0	0	0	0	0	0	0	0	0	0	0	0	0	0	0	0	0	0	0
	327	0	0	0	0	0	0	0	0	0	0	0	0	0	0	0	0	0	0	0	0									327	0	0	0	0	0	0	0	0	0	0	0	0	0	0	0	0	0	0	0
	328	0	0	0	0	0	0	0	0	0	0	0	0	0	0	0	0	0	0	0	0									328	0	0	0	0	0	0	0	0	0	0	0	0	0	0	0	0	0	0	0
	329	0	0	0	0	0	0	0	0	0	0	0	0	0	0	0	0	0	0	0	0									329	0	0	0	0	0	0	0	0	0	0	0	0	0	0	0	0	0	0	0
	330	0	0	0	0	0	0	0	0	0	0	0	0	0	0	0	0	0	0	0	0									330	0	0	0	0	0	0	0	0	0	0	0	0	0	0	0	0	0	0	0
	331	0	0	0	0	0	0	0	0	0	0	0	0	0	0	0	0	0	0	0	0									331	0	0	0	0	0	0	0	0	0	0	0	0	0	0	0	0	0	0	0
	332	0	0	0	0	0	0	0	0	0	0	0	0	0	0	0	0	0	0	0	0									332	0	0	0	0	0	0	0	0	0	0	0	0	0	0	0	0	0	0	0
	333	0	0	0	0	0	0	0	0	0	0	0	0	0	0	0	0	0	0	0	0									333	0	0	0	0	0	0	0	0	0	0	0	0	0	0	0	0	0	0	0
	334	0	0	0	0	0	0	0	0	0	0	0	0	0	0	0	0	0	0	0	0									334	0	0	0	0	0	0	0	0	0	0	0	0	0	0	0	0	0	0	0
	335	0	0	0	0	0	0	0	0	0	0	0	0	0	0	0	0	0	0	0	0									335	0	0	0	0	0	0	0	0	0	0	0	0	0	0	0	0	0	0	0
	336	0	0	0	0	0	0	0	0	0	0	0	0	0	0	0	0	0	0	0	0									336	0	0	0	0	0	0	0	0	0	0	0	0	0	0	0	0	0	0	0
	337	0	0	0	0	0	0	0	0	0	0	0	0	0	0	0	0	0	0	0	0									337	0	0	0	0	0	0	0	0	0	0	0	0	0	0	0	0	0	0	0
	338	0	0	0	0	0	0	0	0	0	0	0	0	0	0	0	0	0	0	0	0									338	0	0	0	0	0	0	0	0	0	0	0	0	0	0	0	0	0	0	0
	339	0	0	0	0	0	0	0	0	0	0	0	0	0	0	0	0	0	0	0	0									339	0	0	0	0	0	0	0	0	0	0	0	0	0	0	0	0	0	0	0
	340	0	0	0	0	0	0	0	0	0	0	0	0	0	0	0	0	0	0	0	0									340	0	0	0	0	0	0	0	0	0	0	0	0	0	0	0	0	0	0	0
	341	0	0	0	0	0	0	0	0	0	0	0	0	0	0	0	0	0	0	0	0									341	0	0	0	0	0	0	0	0	0	0	0	0	0	0	0	0	0	0	0
	342	0	0	0	0	0	0	0	0	0	0	0	0	0	0	0	0	0	0	0	0									342	0	0	0	0	0	0	0	0	0	0	0	0	0	0	0	0	0	0	0
	343	0	0	0	0	0	0	0	0	0	0	0	0	0	0	0	0	0	0	0	0									343	0	0	0	0	0	0	0	0	0	0	0	0	0	0	0	0	0	0	0
	344	0	0	0	0	0	0	0	0	0	0	0	0	0	0	0	0	0	0	0	0									344	0	0	0	0	0	0	0	0	0	0	0	0	0	0	0	0	0	0	0
	345	0	0	0	0	0	0	0	0	0	0	0	0	0	0	0	0	0	0	0	0									345	0	0	0	0	0	0	0	0	0	0	0	0	0	0	0	0	0	0	0
	346	0	0	0	0	0	0	0	0	0	0	0	0	0	0	0	0	0	0	0	0									346	0	0	0	0	0	0	0	0	0	0	0	0	0	0	0	0	0	0	0
	347	0	0	0	0	0	0	0	0	0	0	0	0	0	0	0	0	0	0	0	0									347	0	0	0	0	0	0	0	0	0	0	0	0	0	0	0	0	0	0	0
	348	0	0	0	0	0	0	0	0	0	0	0	0	0	0	0	0	0	0	0	0									348	0	0	0	0	0	0	0	0	0	0	0	0	0	0	0	0	0	0	0
	349	0	0	0	0	0	0	0	0	0	0	0	0	0	0	0	0	0	0	0	0									349	0	0	0	0	0	0	0	0	0	0	0	0	0	0	0	0	0	0	0
	350	0	0	0	0	0	0	0	0	0	0	0	0	0	0	0	0	0	0	0	0									350	0	0	0	0	0	0	0	0	0	0	0	0	0	0	0	0	0	0	0
	351	0	0	0	0	0	0	0	0	0	0	0	0	0	0	0	0	0	0	0	0									351	0	0	0	0	0	0	0	0	0	0	0	0	0	0	0	0	0	0	0
	352	0	0	0	0	0	0	0	0	0	0	0	0	0	0	0	0	0	0	0	0									352	0	0	0	0	0	0	0	0	0	0	0	0	0	0	0	0	0	0	0
	353	0	0	0	0	0	0	0	0	0	0	0	0	0	0	0	0	0	0	0	0									353	0	0	0	0	0	0	0	0	0	0	0	0	0	0	0	0	0	0	0
	354	0	0	0	0	0	0	0	0	0	0	0	0	0	0	0	0	0	0	0	0									354	0	0	0	0	0	0	0	0	0	0	0	0	0	0	0	0	0	0	0
	355	0	0	0	0	0	0	0	0	0	0	0	0	0	0	0	0	0	0	0	0									355	0	0	0	0	0	0	0	0	0	0	0	0	0	0	0	0	0	0	0
	356	0	0	0	0	0	0	0	0	0	0	0	0	0	0	0	0	0	0	0	0									356	0	0	0	0	0	0	0	0	0	0	0	0	0	0	0	0	0	0	0
	357	0	0	0	0	0	0	0	0	0	0	0	0	0	0	0	0	0	0	0	0									357	0	0	0	0	0	0	0	0	0	0	0	0	0	0	0	0	0	0	0
	358	0	0	0	0	0	0	0	0	0	0	0	0	0	0	0	0	0	0	0	0									358	0	0	0	0	0	0	0	0	0	0	0	0	0	0	0	0	0	0	0
	359	0	0	0	0	0	0	0	0	0	0	0	0	0	0	0	0	0	0	0	0									359	0	0	0	0	0	0	0	0	0	0	0	0	0	0	0	0	0	0	0
	360	0	0	0	0	0	0	0	0	0	0	0	0	0	0	0	0	0	0	0	0									360	0	0	0	0	0	0	0	0	0	0	0	0	0	0	0	0	0	0	0
	361	0	0	0	0	0	0	0	0	0	0	0	0	0	0	0	0	0	0	0	0									361	0	0	0	0	0	0	0	0	0	0	0	0	0	0	0	0	0	0	0
	362	0	0	0	0	0	0	0	0	0	0	0	0	0	0	0	0	0	0	0	0									362	0	0	0	0	0	0	0	0	0	0	0	0	0	0	0	0	0	0	0
	363	0	0	0	0	0	0	0	0	0	0	0	0	0	0	0	0	0	0	0	0									363	0	0	0	0	0	0	0	0	0	0	0	0	0	0	0	0	0	0	0
	364	0	0	0	0	0	0	0	0	0	0	0	0	0	0	0	0	0	0	0	0									364	0	0	0	0	0	0	0	0	0	0	0	0	0	0	0	0	0	0	0
	365	0	0	0	0	0	0	0	0	0	0	0	0	0	0	0	0	0	0	0	0									365	0	0	0	0	0	0	0	0	0	0	0	0	0	0	0	0	0	0	0
	366	0	0	0	0	0	0	0	0	0	0	0	0	0	0	0	0	0	0	0	0									366	0	0	0	0	0	0	0	0	0	0	0	0	0	0	0	0	0	0	0
	367	0	0	0	0	0	0	0	0	0	0	0	0	0	0	0	0	0	0	0	0									367	0	0	0	0	0	0	0	0	0	0	0	0	0	0	0	0	0	0	0
	368	0	0	0	0	0	0	0	0	0	0	0	0	0	0	0	0	0	0	0	0									368	0	0	0	0	0	0	0	0	0	0	0	0	0	0	0	0	0	0	0
	369	0	0	0	0	0	0	0	0	0	0	0	0	0	0	0	0	0	0	0	0									369	0	0	0	0	0	0	0	0	0	0	0	0	0	0	0	0	0	0	0
	370	0	0	0	0	0	0	0	0	0	0	0	0	0	0	0	0	0	0	0	0									370	0	0	0	0	0	0	0	0	0	0	0	0	0	0	0	0	0	0	0
	371	0	0	0	0	0	0	0	0	0	0	0	0	0	0	0	0	0	0	0	0									371	0	0	0	0	0	0	0	0	0	0	0	0	0	0	0	0	0	0	0
	372	0	0	0	0	0	0	0	0	0	0	0	0	0	0	0	0	0	0	0	0									372	0	0	0	0	0	0	0	0	0	0	0	0	0	0	0	0	0	0	0
	373	0	0	0	0	0	0	0	0	0	0	0	0	0	0	0	0	0	0	0	0									373	0	0	0	0	0	0	0	0	0	0	0	0	0	0	0	0	0	0	0
	374	0	0	0	0	0	0	0	0	0	0	0	0	0	0	0	0	0	0	0	0									374	0	0	0	0	0	0	0	0	0	0	0	0	0	0	0	0	0	0	0
	375	0	0	0	0	0	0	0	0	0	0	0	0	0	0	0	0	0	0	0	0									375	0	0	0	0	0	0	0	0	0	0	0	0	0	0	0	0	0	0	0
	376	0	0	0	0	0	0	0	0	0	0	0	0	0	0	0	0	0	0	0	0									376	0	0	0	0	0	0	0	0	0	0	0	0	0	0	0	0	0	0	0
	377	0	0	0	0	0	0	0	0	0	0	0	0	0	0	0	0	0	0	0	0									377	0	0	0	0	0	0	0	0	0	0	0	0	0	0	0	0	0	0	0
	378	0	0	0	0	0	0	0	0	0	0	0	0	0	0	0	0	0	0	0	0									378	0	0	0	0	0	0	0	0	0	0	0	0	0	0	0	0	0	0	0
	379	0	0	0	0	0	0	0	0	0	0	0	0	0	0	0	0	0	0	0	0									379	0	0	0	0	0	0	0	0	0	0	0	0	0	0	0	0	0	0	0
	380	0	0	0	0	0	0	0	0	0	0	0	0	0	0	0	0	0	0	0	0									380	0	0	0	0	0	0	0	0	0	0	0	0	0	0	0	0	0	0	0
	381	0	0	0	0	0	0	0	0	0	0	0	0	0	0	0	0	0	0	0	0									381	0	0	0	0	0	0	0	0	0	0	0	0	0	0	0	0	0	0	0
	382	0	0	0	0	0	0	0	0	0	0	0	0	0	0	0	0	0	0	0	0									382	0	0	0	0	0	0	0	0	0	0	0	0	0	0	0	0	0	0	0
	383	0	0	0	0	0	0	0	0	0	0	0	0	0	0	0	0	0	0	0	0									383	0	0	0	0	0	0	0	0	0	0	0	0	0	0	0	0	0	0	0
	384	0	0	0	0	0	0	0	0	0	0	0	0	0	0	0	0	0	0	0	0									384	0	0	0	0	0	0	0	0	0	0	0	0	0	0	0	0	0	0	0
	385	0	0	0	0	0	0	0	0	0	0	0	0	0	0	0	0	0	0	0	0									385	0	0	0	0	0	0	0	0	0	0	0	0	0	0	0	0	0	0	0
	386	0	0	0	0	0	0	0	0	0	0	0	0	0	0	0	0	0	0	0	0									386	0	0	0	0	0	0	0	0	0	0	0	0	0	0	0	0	0	0	0
	387	0	0	0	0	0	0	0	0	0	0	0	0	0	0	0	0	0	0	0	0									387	0	0	0	0	0	0	0	0	0	0	0	0	0	0	0	0	0	0	0
	388	0	0	0	0	0	0	0	0	0	0	0	0	0	0	0	0	0	0	0	0									388	0	0	0	0	0	0	0	0	0	0	0	0	0	0	0	0	0	0	0
	389	0	0	0	0	0	0	0	0	0	0	0	0	0	0	0	0	0	0	0	0									389	0	0	0	0	0	0	0	0	0	0	0	0	0	0	0	0	0	0	0
	390	0	0	0	0	0	0	0	0	0	0	0	0	0	0	0	0	0	0	0	0									390	0	0	0	0	0	0	0	0	0	0	0	0	0	0	0	0	0	0	0
	391	0	0	0	0	0	0	0	0	0	0	0	0	0	0	0	0	0	0	0	0									391	0	0	0	0	0	0	0	0	0	0	0	0	0	0	0	0	0	0	0
	392	0	0	0	0	0	0	0	0	0	0	0	0	0	0	0	0	0	0	0	0									392	0	0	0	0	0	0	0	0	0	0	0	0	0	0	0	0	0	0	0
	393	0	0	0	0	0	0	0	0	0	0	0	0	0	0	0	0	0	0	0	0									393	0	0	0	0	0	0	0	0	0	0	0	0	0	0	0	0	0	0	0
	394	0	0	0	0	0	0	0	0	0	0	0	0	0	0	0	0	0	0	0	0									394	0	0	0	0	0	0	0	0	0	0	0	0	0	0	0	0	0	0	0
	395	0	0	0	0	0	0	0	0	0	0	0	0	0	0	0	0	0	0	0	0									395	0	0	0	0	0	0	0	0	0	0	0	0	0	0	0	0	0	0	0
	396	0	0	0	0	0	0	0	0	0	0	0	0	0	0	0	0	0	0	0	0									396	0	0	0	0	0	0	0	0	0	0	0	0	0	0	0	0	0	0	0
	397	0	0	0	0	0	0	0	0	0	0	0	0	0	0	0	0	0	0	0	0									397	0	0	0	0	0	0	0	0	0	0	0	0	0	0	0	0	0	0	0
	398	0	0	0	0	0	0	0	0	0	0	0	0	0	0	0	0	0	0	0	0									398	0	0	0	0	0	0	0	0	0	0	0	0	0	0	0	0	0	0	0
	399	0	0	0	0	0	0	0	0	0	0	0	0	0	0	0	0	0	0	0	0									399	0	0	0	0	0	0	0	0	0	0	0	0	0	0	0	0	0	0	0
	400	0	0	0	0	0	0	0	0	0	0	0	0	0	0	0	0	0	0	0	0									400	0	0	0	0	0	0	0	0	0	0	0	0	0	0	0	0	0	0	0
	401	0	0	0	0	0	0	0	0	0	0	0	0	0	0	0	0	0	0	0	0									401	0	0	0	0	0	0	0	0	0	0	0	0	0	0	0	0	0	0	0
	402	0	0	0	0	0	0	0	0	0	0	0	0	0	0	0	0	0	0	0	0									402	0	0	0	0	0	0	0	0	0	0	0	0	0	0	0	0	0	0	0
	403	0	0	0	0	0	0	0	0	0	0	0	0	0	0	0	0	0	0	0	0									403	0	0	0	0	0	0	0	0	0	0	0	0	0	0	0	0	0	0	0
	404	0	0	0	0	0	0	0	0	0	0	0	0	0	0	0	0	0	0	0	0									404	0	0	0	0	0	0	0	0	0	0	0	0	0	0	0	0	0	0	0
	405	0	0	0	0	0	0	0	0	0	0	0	0	0	0	0	0	0	0	0	0									405	0	0	0	0	0	0	0	0	0	0	0	0	0	0	0	0	0	0	0
	406	0	0	0	0	0	0	0	0	0	0	0	0	0	0	0	0	0	0	0	0									406	0	0	0	0	0	0	0	0	0	0	0	0	0	0	0	0	0	0	0
	407	0	0	0	0	0	0	0	0	0	0	0	0	0	0	0	0	0	0	0	0									407	0	0	0	0	0	0	0	0	0	0	0	0	0	0	0	0	0	0	0
	408	0	0	0	0	0	0	0	0	0	0	0	0	0	0	0	0	0	0	0	0									408	0	0	0	0	0	0	0	0	0	0	0	0	0	0	0	0	0	0	0
	409	0	0	0	0	0	0	0	0	0	0	0	0	0	0	0	0	0	0	0	0									409	0	0	0	0	0	0	0	0	0	0	0	0	0	0	0	0	0	0	0
	410	0	0	0	0	0	0	0	0	0	0	0	0	0	0	0	0	0	0	0	0									410	0	0	0	0	0	0	0	0	0	0	0	0	0	0	0	0	0	0	0
	411	0	0	0	0	0	0	0	0	0	0	0	0	0	0	0	0	0	0	0	0									411	0	0	0	0	0	0	0	0	0	0	0	0	0	0	0	0	0	0	0
	412	0	0	0	0	0	0	0	0	0	0	0	0	0	0	0	0	0	0	0	0									412	0	0	0	0	0	0	0	0	0	0	0	0	0	0	0	0	0	0	0
	413	0	0	0	0	0	0	0	0	0	0	0	0	0	0	0	0	0	0	0	0									413	0	0	0	0	0	0	0	0	0	0	0	0	0	0	0	0	0	0	0
	414	0	0	0	0	0	0	0	0	0	0	0	0	0	0	0	0	0	0	0	0									414	0	0	0	0	0	0	0	0	0	0	0	0	0	0	0	0	0	0	0
	415	0	0	0	0	0	0	0	0	0	0	0	0	0	0	0	0	0	0	0	0									415	0	0	0	0	0	0	0	0	0	0	0	0	0	0	0	0	0	0	0
	416	0	0	0	0	0	0	0	0	0	0	0	0	0	0	0	0	0	0	0	0									416	0	0	0	0	0	0	0	0	0	0	0	0	0	0	0	0	0	0	0
	417	0	0	0	0	0	0	0	0	0	0	0	0	0	0	0	0	0	0	0	0									417	0	0	0	0	0	0	0	0	0	0	0	0	0	0	0	0	0	0	0
	418	0	0	0	0	0	0	0	0	0	0	0	0	0	0	0	0	0	0	0	0									418	0	0	0	0	0	0	0	0	0	0	0	0	0	0	0	0	0	0	0
	419	0	0	0	0	0	0	0	0	0	0	0	0	0	0	0	0	0	0	0	0									419	0	0	0	0	0	0	0	0	0	0	0	0	0	0	0	0	0	0	0
	420	0	0	0	0	0	0	0	0	0	0	0	0	0	0	0	0	0	0	0	0									420	0	0	0	0	0	0	0	0	0	0	0	0	0	0	0	0	0	0	0
	421	0	0	0	0	0	0	0	0	0	0	0	0	0	0	0	0	0	0	0	0									421	0	0	0	0	0	0	0	0	0	0	0	0	0	0	0	0	0	0	0
	422	0	0	0	0	0	0	0	0	0	0	0	0	0	0	0	0	0	0	0	0									422	0	0	0	0	0	0	0	0	0	0	0	0	0	0	0	0	0	0	0
	423	0	0	0	0	0	0	0	0	0	0	0	0	0	0	0	0	0	0	0	0									423	0	0	0	0	0	0	0	0	0	0	0	0	0	0	0	0	0	0	0
	424	0	0	0	0	0	0	0	0	0	0	0	0	0	0	0	0	0	0	0	0									424	0	0	0	0	0	0	0	0	0	0	0	0	0	0	0	0	0	0	0
	425	0	0	0	0	0	0	0	0	0	0	0	0	0	0	0	0	0	0	0	0									425	0	0	0	0	0	0	0	0	0	0	0	0	0	0	0	0	0	0	0
	426	0	0	0	0	0	0	0	0	0	0	0	0	0	0	0	0	0	0	0	0									426	0	0	0	0	0	0	0	0	0	0	0	0	0	0	0	0	0	0	0
	427	0	0	0	0	0	0	0	0	0	0	0	0	0	0	0	0	0	0	0	0									427	0	0	0	0	0	0	0	0	0	0	0	0	0	0	0	0	0	0	0
	428	0	0	0	0	0	0	0	0	0	0	0	0	0	0	0	0	0	0	0	0									428	0	0	0	0	0	0	0	0	0	0	0	0	0	0	0	0	0	0	0
	429	0	0	0	0	0	0	0	0	0	0	0	0	0	0	0	0	0	0	0	0									429	0	0	0	0	0	0	0	0	0	0	0	0	0	0	0	0	0	0	0
	430	0	0	0	0	0	0	0	0	0	0	0	0	0	0	0	0	0	0	0	0									430	0	0	0	0	0	0	0	0	0	0	0	0	0	0	0	0	0	0	0
	431	0	0	0	0	0	0	0	0	0	0	0	0	0	0	0	0	0	0	0	0									431	0	0	0	0	0	0	0	0	0	0	0	0	0	0	0	0	0	0	0
	432	0	0	0	0	0	0	0	0	0	0	0	0	0	0	0	0	0	0	0	0									432	0	0	0	0	0	0	0	0	0	0	0	0	0	0	0	0	0	0	0
	433	0	0	0	0	0	0	0	0	0	0	0	0	0	0	0	0	0	0	0	0									433	0	0	0	0	0	0	0	0	0	0	0	0	0	0	0	0	0	0	0
	434	0	0	0	0	0	0	0	0	0	0	0	0	0	0	0	0	0	0	0	0									434	0	0	0	0	0	0	0	0	0	0	0	0	0	0	0	0	0	0	0
	435	0	0	0	0	0	0	0	0	0	0	0	0	0	0	0	0	0	0	0	0									435	0	0	0	0	0	0	0	0	0	0	0	0	0	0	0	0	0	0	0
	436	0	0	0	0	0	0	0	0	0	0	0	0	0	0	0	0	0	0	0	0									436	0	0	0	0	0	0	0	0	0	0	0	0	0	0	0	0	0	0	0
	437	0	0	0	0	0	0	0	0	0	0	0	0	0	0	0	0	0	0	0	0									437	0	0	0	0	0	0	0	0	0	0	0	0	0	0	0	0	0	0	0
	438	0	0	0	0	0	0	0	0	0	0	0	0	0	0	0	0	0	0	0	0									438	0	0	0	0	0	0	0	0	0	0	0	0	0	0	0	0	0	0	0
	439	0	0	0	0	0	0	0	0	0	0	0	0	0	0	0	0	0	0	0	0									439	0	0	0	0	0	0	0	0	0	0	0	0	0	0	0	0	0	0	0
	440	0	0	0	0	0	0	0	0	0	0	0	0	0	0	0	0	0	0	0	0									440	0	0	0	0	0	0	0	0	0	0	0	0	0	0	0	0	0	0	0
	441	0	0	0	0	0	0	0	0	0	0	0	0	0	0	0	0	0	0	0	0									441	0	0	0	0	0	0	0	0	0	0	0	0	0	0	0	0	0	0	0
	442	0	0	0	0	0	0	0	0	0	0	0	0	0	0	0	0	0	0	0	0									442	0	0	0	0	0	0	0	0	0	0	0	0	0	0	0	0	0	0	0
	443	0	0	0	0	0	0	0	0	0	0	0	0	0	0	0	0	0	0	0	0									443	0	0	0	0	0	0	0	0	0	0	0	0	0	0	0	0	0	0	0
	444	0	0	0	0	0	0	0	0	0	0	0	0	0	0	0	0	0	0	0	0									444	0	0	0	0	0	0	0	0	0	0	0	0	0	0	0	0	0	0	0
	445	0	0	0	0	0	0	0	0	0	0	0	0	0	0	0	0	0	0	0	0									445	0	0	0	0	0	0	0	0	0	0	0	0	0	0	0	0	0	0	0
	446	0	0	0	0	0	0	0	0	0	0	0	0	0	0	0	0	0	0	0	0									446	0	0	0	0	0	0	0	0	0	0	0	0	0	0	0	0	0	0	0
	447	0	0	0	0	0	0	0	0	0	0	0	0	0	0	0	0	0	0	0	0									447	0	0	0	0	0	0	0	0	0	0	0	0	0	0	0	0	0	0	0
	448	0	0	0	0	0	0	0	0	0	0	0	0	0	0	0	0	0	0	0	0									448	0	0	0	0	0	0	0	0	0	0	0	0	0	0	0	0	0	0	0
	449	0	0	0	0	0	0	0	0	0	0	0	0	0	0	0	0	0	0	0	0									449	0	0	0	0	0	0	0	0	0	0	0	0	0	0	0	0	0	0	0
	450	0	0	0	0	0	0	0	0	0	0	0	0	0	0	0	0	0	0	0	0									450	0	0	0	0	0	0	0	0	0	0	0	0	0	0	0	0	0	0	0
	451	0	0	0	0	0	0	0	0	0	0	0	0	0	0	0	0	0	0	0	0									451	0	0	0	0	0	0	0	0	0	0	0	0	0	0	0	0	0	0	0
	452	0	0	0	0	0	0	0	0	0	0	0	0	0	0	0	0	0	0	0	0									452	0	0	0	0	0	0	0	0	0	0	0	0	0	0	0	0	0	0	0
	453	0	0	0	0	0	0	0	0	0	0	0	0	0	0	0	0	0	0	0	0									453	0	0	0	0	0	0	0	0	0	0	0	0	0	0	0	0	0	0	0
	454	0	0	0	0	0	0	0	0	0	0	0	0	0	0	0	0	0	0	0	0									454	0	0	0	0	0	0	0	0	0	0	0	0	0	0	0	0	0	0	0
	455	0	0	0	0	0	0	0	0	0	0	0	0	0	0	0	0	0	0	0	0									455	0	0	0	0	0	0	0	0	0	0	0	0	0	0	0	0	0	0	0
	456	0	0	0	0	0	0	0	0	0	0	0	0	0	0	0	0	0	0	0	0									456	0	0	0	0	0	0	0	0	0	0	0	0	0	0	0	0	0	0	0
	457	0	0	0	0	0	0	0	0	0	0	0	0	0	0	0	0	0	0	0	0									457	0	0	0	0	0	0	0	0	0	0	0	0	0	0	0	0	0	0	0
	458	0	0	0	0	0	0	0	0	0	0	0	0	0	0	0	0	0	0	0	0									458	0	0	0	0	0	0	0	0	0	0	0	0	0	0	0	0	0	0	0
	459	0	0	0	0	0	0	0	0	0	0	0	0	0	0	0	0	0	0	0	0									459	0	0	0	0	0	0	0	0	0	0	0	0	0	0	0	0	0	0	0
	460	0	0	0	0	0	0	0	0	0	0	0	0	0	0	0	0	0	0	0	0									460	0	0	0	0	0	0	0	0	0	0	0	0	0	0	0	0	0	0	0
	461	0	0	0	0	0	0	0	0	0	0	0	0	0	0	0	0	0	0	0	0									461	0	0	0	0	0	0	0	0	0	0	0	0	0	0	0	0	0	0	0
	462	0	0	0	0	0	0	0	0	0	0	0	0	0	0	0	0	0	0	0	0									462	0	0	0	0	0	0	0	0	0	0	0	0	0	0	0	0	0	0	0
	463	0	0	0	0	0	0	0	0	0	0	0	0	0	0	0	0	0	0	0	0									463	0	0	0	0	0	0	0	0	0	0	0	0	0	0	0	0	0	0	0
	464	0	0	0	0	0	0	0	0	0	0	0	0	0	0	0	0	0	0	0	0									464	0	0	0	0	0	0	0	0	0	0	0	0	0	0	0	0	0	0	0
	465	0	0	0	0	0	0	0	0	0	0	0	0	0	0	0	0	0	0	0	0									465	0	0	0	0	0	0	0	0	0	0	0	0	0	0	0	0	0	0	0
	466	0	0	0	0	0	0	0	0	0	0	0	0	0	0	0	0	0	0	0	0									466	0	0	0	0	0	0	0	0	0	0	0	0	0	0	0	0	0	0	0
	467	0	0	0	0	0	0	0	0	0	0	0	0	0	0	0	0	0	0	0	0									467	0	0	0	0	0	0	0	0	0	0	0	0	0	0	0	0	0	0	0
	468	0	0	0	0	0	0	0	0	0	0	0	0	0	0	0	0	0	0	0	0									468	0	0	0	0	0	0	0	0	0	0	0	0	0	0	0	0	0	0	0
	469	0	0	0	0	0	0	0	0	0	0	0	0	0	0	0	0	0	0	0	0									469	0	0	0	0	0	0	0	0	0	0	0	0	0	0	0	0	0	0	0
	470	0	0	0	0	0	0	0	0	0	0	0	0	0	0	0	0	0	0	0	0									470	0	0	0	0	0	0	0	0	0	0	0	0	0	0	0	0	0	0	0
	471	0	0	0	0	0	0	0	0	0	0	0	0	0	0	0	0	0	0	0	0									471	0	0	0	0	0	0	0	0	0	0	0	0	0	0	0	0	0	0	0
	472	0	0	0	0	0	0	0	0	0	0	0	0	0	0	0	0	0	0	0	0									472	0	0	0	0	0	0	0	0	0	0	0	0	0	0	0	0	0	0	0
	473	0	0	0	0	0	0	0	0	0	0	0	0	0	0	0	0	0	0	0	0									473	0	0	0	0	0	0	0	0	0	0	0	0	0	0	0	0	0	0	0
	474	0	0	0	0	0	0	0	0	0	0	0	0	0	0	0	0	0	0	0	0									474	0	0	0	0	0	0	0	0	0	0	0	0	0	0	0	0	0	0	0
	475	0	0	0	0	0	0	0	0	0	0	0	0	0	0	0	0	0	0	0	0									475	0	0	0	0	0	0	0	0	0	0	0	0	0	0	0	0	0	0	0
	476	0	0	0	0	0	0	0	0	0	0	0	0	0	0	0	0	0	0	0	0									476	0	0	0	0	0	0	0	0	0	0	0	0	0	0	0	0	0	0	0
	477	0	0	0	0	0	0	0	0	0	0	0	0	0	0	0	0	0	0	0	0									477	0	0	0	0	0	0	0	0	0	0	0	0	0	0	0	0	0	0	0
	478	0	0	0	0	0	0	0	0	0	0	0	0	0	0	0	0	0	0	0	0									478	0	0	0	0	0	0	0	0	0	0	0	0	0	0	0	0	0	0	0
	479	0	0	0	0	0	0	0	0	0	0	0	0	0	0	0	0	0	0	0	0									479	0	0	0	0	0	0	0	0	0	0	0	0	0	0	0	0	0	0	0
	480	0	0	0	0	0	0	0	0	0	0	0	0	0	0	0	0	0	0	0	0									480	0	0	0	0	0	0	0	0	0	0	0	0	0	0	0	0	0	0	0
	481	0	0	0	0	0	0	0	0	0	0	0	0	0	0	0	0	0	0	0	0									481	0	0	0	0	0	0	0	0	0	0	0	0	0	0	0	0	0	0	0
	482	0	0	0	0	0	0	0	0	0	0	0	0	0	0	0	0	0	0	0	0									482	0	0	0	0	0	0	0	0	0	0	0	0	0	0	0	0	0	0	0
	483	0	0	0	0	0	0	0	0	0	0	0	0	0	0	0	0	0	0	0	0									483	0	0	0	0	0	0	0	0	0	0	0	0	0	0	0	0	0	0	0
	484	0	0	0	0	0	0	0	0	0	0	0	0	0	0	0	0	0	0	0	0									484	0	0	0	0	0	0	0	0	0	0	0	0	0	0	0	0	0	0	0
	485	0	0	0	0	0	0	0	0	0	0	0	0	0	0	0	0	0	0	0	0									485	0	0	0	0	0	0	0	0	0	0	0	0	0	0	0	0	0	0	0
	486	0	0	0	0	0	0	0	0	0	0	0	0	0	0	0	0	0	0	0	0									486	0	0	0	0	0	0	0	0	0	0	0	0	0	0	0	0	0	0	0
	487	0	0	0	0	0	0	0	0	0	0	0	0	0	0	0	0	0	0	0	0									487	0	0	0	0	0	0	0	0	0	0	0	0	0	0	0	0	0	0	0
	488	0	0	0	0	0	0	0	0	0	0	0	0	0	0	0	0	0	0	0	0									488	0	0	0	0	0	0	0	0	0	0	0	0	0	0	0	0	0	0	0
	489	0	0	0	0	0	0	0	0	0	0	0	0	0	0	0	0	0	0	0	0									489	0	0	0	0	0	0	0	0	0	0	0	0	0	0	0	0	0	0	0
	490	0	0	0	0	0	0	0	0	0	0	0	0	0	0	0	0	0	0	0	0									490	0	0	0	0	0	0	0	0	0	0	0	0	0	0	0	0	0	0	0
	491	0	0	0	0	0	0	0	0	0	0	0	0	0	0	0	0	0	0	0	0									491	0	0	0	0	0	0	0	0	0	0	0	0	0	0	0	0	0	0	0
	492	0	0	0	0	0	0	0	0	0	0	0	0	0	0	0	0	0	0	0	0									492	0	0	0	0	0	0	0	0	0	0	0	0	0	0	0	0	0	0	0
	493	0	0	0	0	0	0	0	0	0	0	0	0	0	0	0	0	0	0	0	0									493	0	0	0	0	0	0	0	0	0	0	0	0	0	0	0	0	0	0	0
	494	0	0	0	0	0	0	0	0	0	0	0	0	0	0	0	0	0	0	0	0									494	0	0	0	0	0	0	0	0	0	0	0	0	0	0	0	0	0	0	0
	495	0	0	0	0	0	0	0	0	0	0	0	0	0	0	0	0	0	0	0	0									495	0	0	0	0	0	0	0	0	0	0	0	0	0	0	0	0	0	0	0
	496	0	0	0	0	0	0	0	0	0	0	0	0	0	0	0	0	0	0	0	0									496	0	0	0	0	0	0	0	0	0	0	0	0	0	0	0	0	0	0	0
	497	0	0	0	0	0	0	0	0	0	0	0	0	0	0	0	0	0	0	0	0									497	0	0	0	0	0	0	0	0	0	0	0	0	0	0	0	0	0	0	0
	498	0	0	0	0	0	0	0	0	0	0	0	0	0	0	0	0	0	0	0	0									498	0	0	0	0	0	0	0	0	0	0	0	0	0	0	0	0	0	0	0
	499	0	0	0	0	0	0	0	0	0	0	0	0	0	0	0	0	0	0	0	0									499	0	0	0	0	0	0	0	0	0	0	0	0	0	0	0	0	0	0	0
	500	0	0	0	0	0	0	0	0	0	0	0	0	0	0	0	0	0	0	0	0									500	0	0	0	0	0	0	0	0	0	0	0	0	0	0	0	0	0	0	0
	501	0	0	0	0	0	0	0	0	0	0	0	0	0	0	0	0	0	0	0	0									501	0	0	0	0	0	0	0	0	0	0	0	0	0	0	0	0	0	0	0
	502	0	0	0	0	0	0	0	0	0	0	0	0	0	0	0	0	0	0	0	0									502	0	0	0	0	0	0	0	0	0	0	0	0	0	0	0	0	0	0	0
	503	0	0	0	0	0	0	0	0	0	0	0	0	0	0	0	0	0	0	0	0									503	0	0	0	0	0	0	0	0	0	0	0	0	0	0	0	0	0	0	0
	504	0	0	0	0	0	0	0	0	0	0	0	0	0	0	0	0	0	0	0	0									504	0	0	0	0	0	0	0	0	0	0	0	0	0	0	0	0	0	0	0
	505	0	0	0	0	0	0	0	0	0	0	0	0	0	0	0	0	0	0	0	0									505	0	0	0	0	0	0	0	0	0	0	0	0	0	0	0	0	0	0	0
	506	0	0	0	0	0	0	0	0	0	0	0	0	0	0	0	0	0	0	0	0									506	0	0	0	0	0	0	0	0	0	0	0	0	0	0	0	0	0	0	0
	507	0	0	0	0	0	0	0	0	0	0	0	0	0	0	0	0	0	0	0	0									507	0	0	0	0	0	0	0	0	0	0	0	0	0	0	0	0	0	0	0
	508	0	0	0	0	0	0	0	0	0	0	0	0	0	0	0	0	0	0	0	0									508	0	0	0	0	0	0	0	0	0	0	0	0	0	0	0	0	0	0	0
	509	0	0	0	0	0	0	0	0	0	0	0	0	0	0	0	0	0	0	0	0									509	0	0	0	0	0	0	0	0	0	0	0	0	0	0	0	0	0	0	0
	510	0	0	0	0	0	0	0	0	0	0	0	0	0	0	0	0	0	0	0	0									510	0	0	0	0	0	0	0	0	0	0	0	0	0	0	0	0	0	0	0
	511	0	0	0	0	0	0	0	0	0	0	0	0	0	0	0	0	0	0	0	0									511	0	0	0	0	0	0	0	0	0	0	0	0	0	0	0	0	0	0	0
	512	0	0	0	0	0	0	0	0	0	0	0	0	0	0	0	0	0	0	0	0									512	0	0	0	0	0	0	0	0	0	0	0	0	0	0	0	0	0	0	0
	513	0	0	0	0	0	0	0	0	0	0	0	0	0	0	0	0	0	0	0	0									513	0	0	0	0	0	0	0	0	0	0	0	0	0	0	0	0	0	0	0
	514	0	0	0	0	0	0	0	0	0	0	0	0	0	0	0	0	0	0	0	0									514	0	0	0	0	0	0	0	0	0	0	0	0	0	0	0	0	0	0	0
	515	0	0	0	0	0	0	0	0	0	0	0	0	0	0	0	0	0	0	0	0									515	0	0	0	0	0	0	0	0	0	0	0	0	0	0	0	0	0	0	0
	516	0	0	0	0	0	0	0	0	0	0	0	0	0	0	0	0	0	0	0	0									516	0	0	0	0	0	0	0	0	0	0	0	0	0	0	0	0	0	0	0
	517	0	0	0	0	0	0	0	0	0	0	0	0	0	0	0	0	0	0	0	0									517	0	0	0	0	0	0	0	0	0	0	0	0	0	0	0	0	0	0	0
	518	0	0	0	0	0	0	0	0	0	0	0	0	0	0	0	0	0	0	0	0									518	0	0	0	0	0	0	0	0	0	0	0	0	0	0	0	0	0	0	0
	519	0	0	0	0	0	0	0	0	0	0	0	0	0	0	0	0	0	0	0	0									519	0	0	0	0	0	0	0	0	0	0	0	0	0	0	0	0	0	0	0
	520	0	0	0	0	0	0	0	0	0	0	0	0	0	0	0	0	0	0	0	0									520	0	0	0	0	0	0	0	0	0	0	0	0	0	0	0	0	0	0	0
	521	0	0	0	0	0	0	0	0	0	0	0	0	0	0	0	0	0	0	0	0									521	0	0	0	0	0	0	0	0	0	0	0	0	0	0	0	0	0	0	0
	522	0	0	0	0	0	0	0	0	0	0	0	0	0	0	0	0	0	0	0	0									522	0	0	0	0	0	0	0	0	0	0	0	0	0	0	0	0	0	0	0
	523	0	0	0	0	0	0	0	0	0	0	0	0	0	0	0	0	0	0	0	0									523	0	0	0	0	0	0	0	0	0	0	0	0	0	0	0	0	0	0	0
	524	0	0	0	0	0	0	0	0	0	0	0	0	0	0	0	0	0	0	0	0									524	0	0	0	0	0	0	0	0	0	0	0	0	0	0	0	0	0	0	0
	525	0	0	0	0	0	0	0	0	0	0	0	0	0	0	0	0	0	0	0	0									525	0	0	0	0	0	0	0	0	0	0	0	0	0	0	0	0	0	0	0
	526	0	0	0	0	0	0	0	0	0	0	0	0	0	0	0	0	0	0	0	0									526	0	0	0	0	0	0	0	0	0	0	0	0	0	0	0	0	0	0	0
	527	0	0	0	0	0	0	0	0	0	0	0	0	0	0	0	0	0	0	0	0									527	0	0	0	0	0	0	0	0	0	0	0	0	0	0	0	0	0	0	0
	528	0	0	0	0	0	0	0	0	0	0	0	0	0	0	0	0	0	0	0	0									528	0	0	0	0	0	0	0	0	0	0	0	0	0	0	0	0	0	0	0
	529	0	0	0	0	0	0	0	0	0	0	0	0	0	0	0	0	0	0	0	0									529	0	0	0	0	0	0	0	0	0	0	0	0	0	0	0	0	0	0	0
	530	0	0	0	0	0	0	0	0	0	0	0	0	0	0	0	0	0	0	0	0									530	0	0	0	0	0	0	0	0	0	0	0	0	0	0	0	0	0	0	0
	531	0	0	0	0	0	0	0	0	0	0	0	0	0	0	0	0	0	0	0	0									531	0	0	0	0	0	0	0	0	0	0	0	0	0	0	0	0	0	0	0
	532	0	0	0	0	0	0	0	0	0	0	0	0	0	0	0	0	0	0	0	0									532	0	0	0	0	0	0	0	0	0	0	0	0	0	0	0	0	0	0	0
	533	0	0	0	0	0	0	0	0	0	0	0	0	0	0	0	0	0	0	0	0									533	0	0	0	0	0	0	0	0	0	0	0	0	0	0	0	0	0	0	0
	534	0	0	0	0	0	0	0	0	0	0	0	0	0	0	0	0	0	0	0	0									534	0	0	0	0	0	0	0	0	0	0	0	0	0	0	0	0	0	0	0
	535	0	0	0	0	0	0	0	0	0	0	0	0	0	0	0	0	0	0	0	0									535	0	0	0	0	0	0	0	0	0	0	0	0	0	0	0	0	0	0	0
	536	0	0	0	0	0	0	0	0	0	0	0	0	0	0	0	0	0	0	0	0									536	0	0	0	0	0	0	0	0	0	0	0	0	0	0	0	0	0	0	0
	537	0	0	0	0	0	0	0	0	0	0	0	0	0	0	0	0	0	0	0	0									537	0	0	0	0	0	0	0	0	0	0	0	0	0	0	0	0	0	0	0
	538	0	0	0	0	0	0	0	0	0	0	0	0	0	0	0	0	0	0	0	0									538	0	0	0	0	0	0	0	0	0	0	0	0	0	0	0	0	0	0	0
	539	0	0	0	0	0	0	0	0	0	0	0	0	0	0	0	0	0	0	0	0									539	0	0	0	0	0	0	0	0	0	0	0	0	0	0	0	0	0	0	0
	540	0	0	0	0	0	0	0	0	0	0	0	0	0	0	0	0	0	0	0	0									540	0	0	0	0	0	0	0	0	0	0	0	0	0	0	0	0	0	0	0
	541	0	0	0	0	0	0	0	0	0	0	0	0	0	0	0	0	0	0	0	0									541	0	0	0	0	0	0	0	0	0	0	0	0	0	0	0	0	0	0	0
	542	0	0	0	0	0	0	0	0	0	0	0	0	0	0	0	0	0	0	0	0									542	0	0	0	0	0	0	0	0	0	0	0	0	0	0	0	0	0	0	0
	543	0	0	0	0	0	0	0	0	0	0	0	0	0	0	0	0	0	0	0	0									543	0	0	0	0	0	0	0	0	0	0	0	0	0	0	0	0	0	0	0
	544	0	0	0	0	0	0	0	0	0	0	0	0	0	0	0	0	0	0	0	0									544	0	0	0	0	0	0	0	0	0	0	0	0	0	0	0	0	0	0	0
	545	0	0	0	0	0	0	0	0	0	0	0	0	0	0	0	0	0	0	0	0									545	0	0	0	0	0	0	0	0	0	0	0	0	0	0	0	0	0	0	0
	546	0	0	0	0	0	0	0	0	0	0	0	0	0	0	0	0	0	0	0	0									546	0	0	0	0	0	0	0	0	0	0	0	0	0	0	0	0	0	0	0
	547	0	0	0	0	0	0	0	0	0	0	0	0	0	0	0	0	0	0	0	0									547	0	0	0	0	0	0	0	0	0	0	0	0	0	0	0	0	0	0	0
	548	0	0	0	0	0	0	0	0	0	0	0	0	0	0	0	0	0	0	0	0									548	0	0	0	0	0	0	0	0	0	0	0	0	0	0	0	0	0	0	0
	549	0	0	0	0	0	0	0	0	0	0	0	0	0	0	0	0	0	0	0	0									549	0	0	0	0	0	0	0	0	0	0	0	0	0	0	0	0	0	0	0
	550	0	0	0	0	0	0	0	0	0	0	0	0	0	0	0	0	0	0	0	0									550	0	0	0	0	0	0	0	0	0	0	0	0	0	0	0	0	0	0	0
	551	0	0	0	0	0	0	0	0	0	0	0	0	0	0	0	0	0	0	0	0									551	0	0	0	0	0	0	0	0	0	0	0	0	0	0	0	0	0	0	0
	552	0	0	0	0	0	0	0	0	0	0	0	0	0	0	0	0	0	0	0	0									552	0	0	0	0	0	0	0	0	0	0	0	0	0	0	0	0	0	0	0
	553	0	0	0	0	0	0	0	0	0	0	0	0	0	0	0	0	0	0	0	0									553	0	0	0	0	0	0	0	0	0	0	0	0	0	0	0	0	0	0	0
	554	0	0	0	0	0	0	0	0	0	0	0	0	0	0	0	0	0	0	0	0									554	0	0	0	0	0	0	0	0	0	0	0	0	0	0	0	0	0	0	0
	555	0	0	0	0	0	0	0	0	0	0	0	0	0	0	0	0	0	0	0	0									555	0	0	0	0	0	0	0	0	0	0	0	0	0	0	0	0	0	0	0
	556	0	0	0	0	0	0	0	0	0	0	0	0	0	0	0	0	0	0	0	0									556	0	0	0	0	0	0	0	0	0	0	0	0	0	0	0	0	0	0	0
	557	0	0	0	0	0	0	0	0	0	0	0	0	0	0	0	0	0	0	0	0									557	0	0	0	0	0	0	0	0	0	0	0	0	0	0	0	0	0	0	0
	558	0	0	0	0	0	0	0	0	0	0	0	0	0	0	0	0	0	0	0	0									558	0	0	0	0	0	0	0	0	0	0	0	0	0	0	0	0	0	0	0
	559	0	0	0	0	0	0	0	0	0	0	0	0	0	0	0	0	0	0	0	0									559	0	0	0	0	0	0	0	0	0	0	0	0	0	0	0	0	0	0	0
	560	0	0	0	0	0	0	0	0	0	0	0	0	0	0	0	0	0	0	0	0									560	0	0	0	0	0	0	0	0	0	0	0	0	0	0	0	0	0	0	0
	561	0	0	0	0	0	0	0	0	0	0	0	0	0	0	0	0	0	0	0	0									561	0	0	0	0	0	0	0	0	0	0	0	0	0	0	0	0	0	0	0
	562	0	0	0	0	0	0	0	0	0	0	0	0	0	0	0	0	0	0	0	0									562	0	0	0	0	0	0	0	0	0	0	0	0	0	0	0	0	0	0	0
	563	0	0	0	0	0	0	0	0	0	0	0	0	0	0	0	0	0	0	0	0									563	0	0	0	0	0	0	0	0	0	0	0	0	0	0	0	0	0	0	0
	564	0	0	0	0	0	0	0	0	0	0	0	0	0	0	0	0	0	0	0	0									564	0	0	0	0	0	0	0	0	0	0	0	0	0	0	0	0	0	0	0
	565	0	0	0	0	0	0	0	0	0	0	0	0	0	0	0	0	0	0	0	0									565	0	0	0	0	0	0	0	0	0	0	0	0	0	0	0	0	0	0	0
	566	0	0	0	0	0	0	0	0	0	0	0	0	0	0	0	0	0	0	0	0									566	0	0	0	0	0	0	0	0	0	0	0	0	0	0	0	0	0	0	0
	567	0	0	0	0	0	0	0	0	0	0	0	0	0	0	0	0	0	0	0	0									567	0	0	0	0	0	0	0	0	0	0	0	0	0	0	0	0	0	0	0
	568	0	0	0	0	0	0	0	0	0	0	0	0	0	0	0	0	0	0	0	0									568	0	0	0	0	0	0	0	0	0	0	0	0	0	0	0	0	0	0	0
	569	0	0	0	0	0	0	0	0	0	0	0	0	0	0	0	0	0	0	0	0									569	0	0	0	0	0	0	0	0	0	0	0	0	0	0	0	0	0	0	0
	570	0	0	0	0	0	0	0	0	0	0	0	0	0	0	0	0	0	0	0	0									570	0	0	0	0	0	0	0	0	0	0	0	0	0	0	0	0	0	0	0
	571	0	0	0	0	0	0	0	0	0	0	0	0	0	0	0	0	0	0	0	0									571	0	0	0	0	0	0	0	0	0	0	0	0	0	0	0	0	0	0	0
	572	0	0	0	0	0	0	0	0	0	0	0	0	0	0	0	0	0	0	0	0									572	0	0	0	0	0	0	0	0	0	0	0	0	0	0	0	0	0	0	0
	573	0	0	0	0	0	0	0	0	0	0	0	0	0	0	0	0	0	0	0	0									573	0	0	0	0	0	0	0	0	0	0	0	0	0	0	0	0	0	0	0
	574	0	0	0	0	0	0	0	0	0	0	0	0	0	0	0	0	0	0	0	0									574	0	0	0	0	0	0	0	0	0	0	0	0	0	0	0	0	0	0	0
	575	0	0	0	0	0	0	0	0	0	0	0	0	0	0	0	0	0	0	0	0									575	0	0	0	0	0	0	0	0	0	0	0	0	0	0	0	0	0	0	0
	576	0	0	0	0	0	0	0	0	0	0	0	0	0	0	0	0	0	0	0	0									576	0	0	0	0	0	0	0	0	0	0	0	0	0	0	0	0	0	0	0
	577	0	0	0	0	0	0	0	0	0	0	0	0	0	0	0	0	0	0	0	0									577	0	0	0	0	0	0	0	0	0	0	0	0	0	0	0	0	0	0	0
	578	0	0	0	0	0	0	0	0	0	0	0	0	0	0	0	0	0	0	0	0									578	0	0	0	0	0	0	0	0	0	0	0	0	0	0	0	0	0	0	0
	579	0	0	0	0	0	0	0	0	0	0	0	0	0	0	0	0	0	0	0	0									579	0	0	0	0	0	0	0	0	0	0	0	0	0	0	0	0	0	0	0
	580	0	0	0	0	0	0	0	0	0	0	0	0	0	0	0	0	0	0	0	0									580	0	0	0	0	0	0	0	0	0	0	0	0	0	0	0	0	0	0	0
	581	0	0	0	0	0	0	0	0	0	0	0	0	0	0	0	0	0	0	0	0									581	0	0	0	0	0	0	0	0	0	0	0	0	0	0	0	0	0	0	0
	582	0	0	0	0	0	0	0	0	0	0	0	0	0	0	0	0	0	0	0	0									582	0	0	0	0	0	0	0	0	0	0	0	0	0	0	0	0	0	0	0
	583	0	0	0	0	0	0	0	0	0	0	0	0	0	0	0	0	0	0	0	0									583	0	0	0	0	0	0	0	0	0	0	0	0	0	0	0	0	0	0	0
	584	0	0	0	0	0	0	0	0	0	0	0	0	0	0	0	0	0	0	0	0									584	0	0	0	0	0	0	0	0	0	0	0	0	0	0	0	0	0	0	0
	585	0	0	0	0	0	0	0	0	0	0	0	0	0	0	0	0	0	0	0	0									585	0	0	0	0	0	0	0	0	0	0	0	0	0	0	0	0	0	0	0
	586	0	0	0	0	0	0	0	0	0	0	0	0	0	0	0	0	0	0	0	0									586	0	0	0	0	0	0	0	0	0	0	0	0	0	0	0	0	0	0	0
	587	0	0	0	0	0	0	0	0	0	0	0	0	0	0	0	0	0	0	0	0									587	0	0	0	0	0	0	0	0	0	0	0	0	0	0	0	0	0	0	0
	588	0	0	0	0	0	0	0	0	0	0	0	0	0	0	0	0	0	0	0	0									588	0	0	0	0	0	0	0	0	0	0	0	0	0	0	0	0	0	0	0
	589	0	0	0	0	0	0	0	0	0	0	0	0	0	0	0	0	0	0	0	0									589	0	0	0	0	0	0	0	0	0	0	0	0	0	0	0	0	0	0	0
	590	0	0	0	0	0	0	0	0	0	0	0	0	0	0	0	0	0	0	0	0									590	0	0	0	0	0	0	0	0	0	0	0	0	0	0	0	0	0	0	0
	591	0	0	0	0	0	0	0	0	0	0	0	0	0	0	0	0	0	0	0	0									591	0	0	0	0	0	0	0	0	0	0	0	0	0	0	0	0	0	0	0
	592	0	0	0	0	0	0	0	0	0	0	0	0	0	0	0	0	0	0	0	0									592	0	0	0	0	0	0	0	0	0	0	0	0	0	0	0	0	0	0	0
	593	0	0	0	0	0	0	0	0	0	0	0	0	0	0	0	0	0	0	0	0									593	0	0	0	0	0	0	0	0	0	0	0	0	0	0	0	0	0	0	0
	594	0	0	0	0	0	0	0	0	0	0	0	0	0	0	0	0	0	0	0	0									594	0	0	0	0	0	0	0	0	0	0	0	0	0	0	0	0	0	0	0
	595	0	0	0	0	0	0	0	0	0	0	0	0	0	0	0	0	0	0	0	0									595	0	0	0	0	0	0	0	0	0	0	0	0	0	0	0	0	0	0	0
	596	0	0	0	0	0	0	0	0	0	0	0	0	0	0	0	0	0	0	0	0									596	0	0	0	0	0	0	0	0	0	0	0	0	0	0	0	0	0	0	0
	597	0	0	0	0	0	0	0	0	0	0	0	0	0	0	0	0	0	0	0	0									597	0	0	0	0	0	0	0	0	0	0	0	0	0	0	0	0	0	0	0
	598	0	0	0	0	0	0	0	0	0	0	0	0	0	0	0	0	0	0	0	0									598	0	0	0	0	0	0	0	0	0	0	0	0	0	0	0	0	0	0	0
	599	0	0	0	0	0	0	0	0	0	0	0	0	0	0	0	0	0	0	0	0									599	0	0	0	0	0	0	0	0	0	0	0	0	0	0	0	0	0	0	0
	600	0	0	0	0	0	0	0	0	0	0	0	0	0	0	0	0	0	0	0	0									600	0	0	0	0	0	0	0	0	0	0	0	0	0	0	0	0	0	0	0
	601	0	0	0	0	0	0	0	0	0	0	0	0	0	0	0	0	0	0	0	0									601	0	0	0	0	0	0	0	0	0	0	0	0	0	0	0	0	0	0	0
	602	0	0	0	0	0	0	0	0	0	0	0	0	0	0	0	0	0	0	0	0									602	0	0	0	0	0	0	0	0	0	0	0	0	0	0	0	0	0	0	0
	603	0	0	0	0	0	0	0	0	0	0	0	0	0	0	0	0	0	0	0	0									603	0	0	0	0	0	0	0	0	0	0	0	0	0	0	0	0	0	0	0
	604	0	0	0	0	0	0	0	0	0	0	0	0	0	0	0	0	0	0	0	0									604	0	0	0	0	0	0	0	0	0	0	0	0	0	0	0	0	0	0	0
	605	0	0	0	0	0	0	0	0	0	0	0	0	0	0	0	0	0	0	0	0									605	0	0	0	0	0	0	0	0	0	0	0	0	0	0	0	0	0	0	0
	606	0	0	0	0	0	0	0	0	0	0	0	0	0	0	0	0	0	0	0	0									606	0	0	0	0	0	0	0	0	0	0	0	0	0	0	0	0	0	0	0
	607	0	0	0	0	0	0	0	0	0	0	0	0	0	0	0	0	0	0	0	0									607	0	0	0	0	0	0	0	0	0	0	0	0	0	0	0	0	0	0	0
	608	0	0	0	0	0	0	0	0	0	0	0	0	0	0	0	0	0	0	0	0									608	0	0	0	0	0	0	0	0	0	0	0	0	0	0	0	0	0	0	0
	609	0	0	0	0	0	0	0	0	0	0	0	0	0	0	0	0	0	0	0	0									609	0	0	0	0	0	0	0	0	0	0	0	0	0	0	0	0	0	0	0
	610	0	0	0	0	0	0	0	0	0	0	0	0	0	0	0	0	0	0	0	0									610	0	0	0	0	0	0	0	0	0	0	0	0	0	0	0	0	0	0	0
	611	0	0	0	0	0	0	0	0	0	0	0	0	0	0	0	0	0	0	0	0									611	0	0	0	0	0	0	0	0	0	0	0	0	0	0	0	0	0	0	0
	612	0	0	0	0	0	0	0	0	0	0	0	0	0	0	0	0	0	0	0	0									612	0	0	0	0	0	0	0	0	0	0	0	0	0	0	0	0	0	0	0
	613	0	0	0	0	0	0	0	0	0	0	0	0	0	0	0	0	0	0	0	0									613	0	0	0	0	0	0	0	0	0	0	0	0	0	0	0	0	0	0	0
	614	0	0	0	0	0	0	0	0	0	0	0	0	0	0	0	0	0	0	0	0									614	0	0	0	0	0	0	0	0	0	0	0	0	0	0	0	0	0	0	0
	615	0	0	0	0	0	0	0	0	0	0	0	0	0	0	0	0	0	0	0	0									615	0	0	0	0	0	0	0	0	0	0	0	0	0	0	0	0	0	0	0
	616	0	0	0	0	0	0	0	0	0	0	0	0	0	0	0	0	0	0	0	0									616	0	0	0	0	0	0	0	0	0	0	0	0	0	0	0	0	0	0	0
	617	0	0	0	0	0	0	0	0	0	0	0	0	0	0	0	0	0	0	0	0									617	0	0	0	0	0	0	0	0	0	0	0	0	0	0	0	0	0	0	0
	618	0	0	0	0	0	0	0	0	0	0	0	0	0	0	0	0	0	0	0	0									618	0	0	0	0	0	0	0	0	0	0	0	0	0	0	0	0	0	0	0
	619	0	0	0	0	0	0	0	0	0	0	0	0	0	0	0	0	0	0	0	0									619	0	0	0	0	0	0	0	0	0	0	0	0	0	0	0	0	0	0	0
	620	0	0	0	0	0	0	0	0	0	0	0	0	0	0	0	0	0	0	0	0									620	0	0	0	0	0	0	0	0	0	0	0	0	0	0	0	0	0	0	0
	621	0	0	0	0	0	0	0	0	0	0	0	0	0	0	0	0	0	0	0	0									621	0	0	0	0	0	0	0	0	0	0	0	0	0	0	0	0	0	0	0
	622	0	0	0	0	0	0	0	0	0	0	0	0	0	0	0	0	0	0	0	0									622	0	0	0	0	0	0	0	0	0	0	0	0	0	0	0	0	0	0	0
	623	0	0	0	0	0	0	0	0	0	0	0	0	0	0	0	0	0	0	0	0									623	0	0	0	0	0	0	0	0	0	0	0	0	0	0	0	0	0	0	0
	624	0	0	0	0	0	0	0	0	0	0	0	0	0	0	0	0	0	0	0	0									624	0	0	0	0	0	0	0	0	0	0	0	0	0	0	0	0	0	0	0
	625	0	0	0	0	0	0	0	0	0	0	0	0	0	0	0	0	0	0	0	0									625	0	0	0	0	0	0	0	0	0	0	0	0	0	0	0	0	0	0	0
	626	0	0	0	0	0	0	0	0	0	0	0	0	0	0	0	0	0	0	0	0									626	0	0	0	0	0	0	0	0	0	0	0	0	0	0	0	0	0	0	0
	627	0	0	0	0	0	0	0	0	0	0	0	0	0	0	0	0	0	0	0	0									627	0	0	0	0	0	0	0	0	0	0	0	0	0	0	0	0	0	0	0
	628	0	0	0	0	0	0	0	0	0	0	0	0	0	0	0	0	0	0	0	0									628	0	0	0	0	0	0	0	0	0	0	0	0	0	0	0	0	0	0	0
	629	0	0	0	0	0	0	0	0	0	0	0	0	0	0	0	0	0	0	0	0									629	0	0	0	0	0	0	0	0	0	0	0	0	0	0	0	0	0	0	0
	630	0	0	0	0	0	0	0	0	0	0	0	0	0	0	0	0	0	0	0	0									630	0	0	0	0	0	0	0	0	0	0	0	0	0	0	0	0	0	0	0
	631	0	0	0	0	0	0	0	0	0	0	0	0	0	0	0	0	0	0	0	0									631	0	0	0	0	0	0	0	0	0	0	0	0	0	0	0	0	0	0	0
	632	0	0	0	0	0	0	0	0	0	0	0	0	0	0	0	0	0	0	0	0									632	0	0	0	0	0	0	0	0	0	0	0	0	0	0	0	0	0	0	0
	633	0	0	0	0	0	0	0	0	0	0	0	0	0	0	0	0	0	0	0	0									633	0	0	0	0	0	0	0	0	0	0	0	0	0	0	0	0	0	0	0
	634	0	0	0	0	0	0	0	0	0	0	0	0	0	0	0	0	0	0	0	0									634	0	0	0	0	0	0	0	0	0	0	0	0	0	0	0	0	0	0	0
	635	0	0	0	0	0	0	0	0	0	0	0	0	0	0	0	0	0	0	0	0									635	0	0	0	0	0	0	0	0	0	0	0	0	0	0	0	0	0	0	0
	636	0	0	0	0	0	0	0	0	0	0	0	0	0	0	0	0	0	0	0	0									636	0	0	0	0	0	0	0	0	0	0	0	0	0	0	0	0	0	0	0
	637	0	0	0	0	0	0	0	0	0	0	0	0	0	0	0	0	0	0	0	0									637	0	0	0	0	0	0	0	0	0	0	0	0	0	0	0	0	0	0	0
	638	0	0	0	0	0	0	0	0	0	0	0	0	0	0	0	0	0	0	0	0									638	0	0	0	0	0	0	0	0	0	0	0	0	0	0	0	0	0	0	0
	639	0	0	0	0	0	0	0	0	0	0	0	0	0	0	0	0	0	0	0	0									639	0	0	0	0	0	0	0	0	0	0	0	0	0	0	0	0	0	0	0
	640	0	0	0	0	0	0	0	0	0	0	0	0	0	0	0	0	0	0	0	0									640	0	0	0	0	0	0	0	0	0	0	0	0	0	0	0	0	0	0	0
	641	0	0	0	0	0	0	0	0	0	0	0	0	0	0	0	0	0	0	0	0									641	0	0	0	0	0	0	0	0	0	0	0	0	0	0	0	0	0	0	0
	642	0	0	0	0	0	0	0	0	0	0	0	0	0	0	0	0	0	0	0	0									642	0	0	0	0	0	0	0	0	0	0	0	0	0	0	0	0	0	0	0
	643	0	0	0	0	0	0	0	0	0	0	0	0	0	0	0	0	0	0	0	0									643	0	0	0	0	0	0	0	0	0	0	0	0	0	0	0	0	0	0	0
	644	0	0	0	0	0	0	0	0	0	0	0	0	0	0	0	0	0	0	0	0									644	0	0	0	0	0	0	0	0	0	0	0	0	0	0	0	0	0	0	0
	645	0	0	0	0	0	0	0	0	0	0	0	0	0	0	0	0	0	0	0	0									645	0	0	0	0	0	0	0	0	0	0	0	0	0	0	0	0	0	0	0
	646	0	0	0	0	0	0	0	0	0	0	0	0	0	0	0	0	0	0	0	0									646	0	0	0	0	0	0	0	0	0	0	0	0	0	0	0	0	0	0	0
	647	0	0	0	0	0	0	0	0	0	0	0	0	0	0	0	0	0	0	0	0									647	0	0	0	0	0	0	0	0	0	0	0	0	0	0	0	0	0	0	0
	648	0	0	0	0	0	0	0	0	0	0	0	0	0	0	0	0	0	0	0	0									648	0	0	0	0	0	0	0	0	0	0	0	0	0	0	0	0	0	0	0
	649	0	0	0	0	0	0	0	0	0	0	0	0	0	0	0	0	0	0	0	0									649	0	0	0	0	0	0	0	0	0	0	0	0	0	0	0	0	0	0	0
	650	0	0	0	0	0	0	0	0	0	0	0	0	0	0	0	0	0	0	0	0									650	0	0	0	0	0	0	0	0	0	0	0	0	0	0	0	0	0	0	0
	651	0	0	0	0	0	0	0	0	0	0	0	0	0	0	0	0	0	0	0	0									651	0	0	0	0	0	0	0	0	0	0	0	0	0	0	0	0	0	0	0
	652	0	0	0	0	0	0	0	0	0	0	0	0	0	0	0	0	0	0	0	0									652	0	0	0	0	0	0	0	0	0	0	0	0	0	0	0	0	0	0	0
	653	0	0	0	0	0	0	0	0	0	0	0	0	0	0	0	0	0	0	0	0									653	0	0	0	0	0	0	0	0	0	0	0	0	0	0	0	0	0	0	0
	654	0	0	0	0	0	0	0	0	0	0	0	0	0	0	0	0	0	0	0	0									654	0	0	0	0	0	0	0	0	0	0	0	0	0	0	0	0	0	0	0
	655	0	0	0	0	0	0	0	0	0	0	0	0	0	0	0	0	0	0	0	0									655	0	0	0	0	0	0	0	0	0	0	0	0	0	0	0	0	0	0	0
	656	0	0	0	0	0	0	0	0	0	0	0	0	0	0	0	0	0	0	0	0									656	0	0	0	0	0	0	0	0	0	0	0	0	0	0	0	0	0	0	0
	657	0	0	0	0	0	0	0	0	0	0	0	0	0	0	0	0	0	0	0	0									657	0	0	0	0	0	0	0	0	0	0	0	0	0	0	0	0	0	0	0
	658	0	0	0	0	0	0	0	0	0	0	0	0	0	0	0	0	0	0	0	0									658	0	0	0	0	0	0	0	0	0	0	0	0	0	0	0	0	0	0	0
	659	0	0	0	0	0	0	0	0	0	0	0	0	0	0	0	0	0	0	0	0									659	0	0	0	0	0	0	0	0	0	0	0	0	0	0	0	0	0	0	0
	660	0	0	0	0	0	0	0	0	0	0	0	0	0	0	0	0	0	0	0	0									660	0	0	0	0	0	0	0	0	0	0	0	0	0	0	0	0	0	0	0
	661	0	0	0	0	0	0	0	0	0	0	0	0	0	0	0	0	0	0	0	0									661	0	0	0	0	0	0	0	0	0	0	0	0	0	0	0	0	0	0	0
	662	0	0	0	0	0	0	0	0	0	0	0	0	0	0	0	0	0	0	0	0									662	0	0	0	0	0	0	0	0	0	0	0	0	0	0	0	0	0	0	0
	663	0	0	0	0	0	0	0	0	0	0	0	0	0	0	0	0	0	0	0	0									663	0	0	0	0	0	0	0	0	0	0	0	0	0	0	0	0	0	0	0
	664	0	0	0	0	0	0	0	0	0	0	0	0	0	0	0	0	0	0	0	0									664	0	0	0	0	0	0	0	0	0	0	0	0	0	0	0	0	0	0	0
	665	0	0	0	0	0	0	0	0	0	0	0	0	0	0	0	0	0	0	0	0									665	0	0	0	0	0	0	0	0	0	0	0	0	0	0	0	0	0	0	0
	666	0	0	0	0	0	0	0	0	0	0	0	0	0	0	0	0	0	0	0	0									666	0	0	0	0	0	0	0	0	0	0	0	0	0	0	0	0	0	0	0
	667	0	0	0	0	0	0	0	0	0	0	0	0	0	0	0	0	0	0	0	0									667	0	0	0	0	0	0	0	0	0	0	0	0	0	0	0	0	0	0	0
	668	0	0	0	0	0	0	0	0	0	0	0	0	0	0	0	0	0	0	0	0									668	0	0	0	0	0	0	0	0	0	0	0	0	0	0	0	0	0	0	0
	669	0	0	0	0	0	0	0	0	0	0	0	0	0	0	0	0	0	0	0	0									669	0	0	0	0	0	0	0	0	0	0	0	0	0	0	0	0	0	0	0
	670	0	0	0	0	0	0	0	0	0	0	0	0	0	0	0	0	0	0	0	0									670	0	0	0	0	0	0	0	0	0	0	0	0	0	0	0	0	0	0	0
	671	0	0	0	0	0	0	0	0	0	0	0	0	0	0	0	0	0	0	0	0									671	0	0	0	0	0	0	0	0	0	0	0	0	0	0	0	0	0	0	0
	672	0	0	0	0	0	0	0	0	0	0	0	0	0	0	0	0	0	0	0	0									672	0	0	0	0	0	0	0	0	0	0	0	0	0	0	0	0	0	0	0
	673	0	0	0	0	0	0	0	0	0	0	0	0	0	0	0	0	0	0	0	0									673	0	0	0	0	0	0	0	0	0	0	0	0	0	0	0	0	0	0	0
	674	0	0	0	0	0	0	0	0	0	0	0	0	0	0	0	0	0	0	0	0									674	0	0	0	0	0	0	0	0	0	0	0	0	0	0	0	0	0	0	0
	675	0	0	0	0	0	0	0	0	0	0	0	0	0	0	0	0	0	0	0	0									675	0	0	0	0	0	0	0	0	0	0	0	0	0	0	0	0	0	0	0
	676	0	0	0	0	0	0	0	0	0	0	0	0	0	0	0	0	0	0	0	0									676	0	0	0	0	0	0	0	0	0	0	0	0	0	0	0	0	0	0	0
	677	0	0	0	0	0	0	0	0	0	0	0	0	0	0	0	0	0	0	0	0									677	0	0	0	0	0	0	0	0	0	0	0	0	0	0	0	0	0	0	0
	678	0	0	0	0	0	0	0	0	0	0	0	0	0	0	0	0	0	0	0	0									678	0	0	0	0	0	0	0	0	0	0	0	0	0	0	0	0	0	0	0
	679	0	0	0	0	0	0	0	0	0	0	0	0	0	0	0	0	0	0	0	0									679	0	0	0	0	0	0	0	0	0	0	0	0	0	0	0	0	0	0	0
	680	0	0	0	0	0	0	0	0	0	0	0	0	0	0	0	0	0	0	0	0									680	0	0	0	0	0	0	0	0	0	0	0	0	0	0	0	0	0	0	0
	681	0	0	0	0	0	0	0	0	0	0	0	0	0	0	0	0	0	0	0	0									681	0	0	0	0	0	0	0	0	0	0	0	0	0	0	0	0	0	0	0
	682	0	0	0	0	0	0	0	0	0	0	0	0	0	0	0	0	0	0	0	0									682	0	0	0	0	0	0	0	0	0	0	0	0	0	0	0	0	0	0	0
	683	0	0	0	0	0	0	0	0	0	0	0	0	0	0	0	0	0	0	0	0									683	0	0	0	0	0	0	0	0	0	0	0	0	0	0	0	0	0	0	0
	684	0	0	0	0	0	0	0	0	0	0	0	0	0	0	0	0	0	0	0	0									684	0	0	0	0	0	0	0	0	0	0	0	0	0	0	0	0	0	0	0
	685	0	0	0	0	0	0	0	0	0	0	0	0	0	0	0	0	0	0	0	0									685	0	0	0	0	0	0	0	0	0	0	0	0	0	0	0	0	0	0	0
	686	0	0	0	0	0	0	0	0	0	0	0	0	0	0	0	0	0	0	0	0									686	0	0	0	0	0	0	0	0	0	0	0	0	0	0	0	0	0	0	0
	687	0	0	0	0	0	0	0	0	0	0	0	0	0	0	0	0	0	0	0	0									687	0	0	0	0	0	0	0	0	0	0	0	0	0	0	0	0	0	0	0
	688	0	0	0	0	0	0	0	0	0	0	0	0	0	0	0	0	0	0	0	0									688	0	0	0	0	0	0	0	0	0	0	0	0	0	0	0	0	0	0	0
	689	0	0	0	0	0	0	0	0	0	0	0	0	0	0	0	0	0	0	0	0									689	0	0	0	0	0	0	0	0	0	0	0	0	0	0	0	0	0	0	0
	690	0	0	0	0	0	0	0	0	0	0	0	0	0	0	0	0	0	0	0	0									690	0	0	0	0	0	0	0	0	0	0	0	0	0	0	0	0	0	0	0
	691	0	0	0	0	0	0	0	0	0	0	0	0	0	0	0	0	0	0	0	0									691	0	0	0	0	0	0	0	0	0	0	0	0	0	0	0	0	0	0	0
	692	0	0	0	0	0	0	0	0	0	0	0	0	0	0	0	0	0	0	0	0									692	0	0	0	0	0	0	0	0	0	0	0	0	0	0	0	0	0	0	0
	693	0	0	0	0	0	0	0	0	0	0	0	0	0	0	0	0	0	0	0	0									693	0	0	0	0	0	0	0	0	0	0	0	0	0	0	0	0	0	0	0
	694	0	0	0	0	0	0	0	0	0	0	0	0	0	0	0	0	0	0	0	0									694	0	0	0	0	0	0	0	0	0	0	0	0	0	0	0	0	0	0	0
	695	0	0	0	0	0	0	0	0	0	0	0	0	0	0	0	0	0	0	0	0									695	0	0	0	0	0	0	0	0	0	0	0	0	0	0	0	0	0	0	0
	696	0	0	0	0	0	0	0	0	0	0	0	0	0	0	0	0	0	0	0	0									696	0	0	0	0	0	0	0	0	0	0	0	0	0	0	0	0	0	0	0
	697	0	0	0	0	0	0	0	0	0	0	0	0	0	0	0	0	0	0	0	0									697	0	0	0	0	0	0	0	0	0	0	0	0	0	0	0	0	0	0	0
	698	0	0	0	0	0	0	0	0	0	0	0	0	0	0	0	0	0	0	0	0									698	0	0	0	0	0	0	0	0	0	0	0	0	0	0	0	0	0	0	0
	699	0	0	0	0	0	0	0	0	0	0	0	0	0	0	0	0	0	0	0	0									699	0	0	0	0	0	0	0	0	0	0	0	0	0	0	0	0	0	0	0
	700	0	0	0	0	0	0	0	0	0	0	0	0	0	0	0	0	0	0	0	0									700	0	0	0	0	0	0	0	0	0	0	0	0	0	0	0	0	0	0	0
	701	0	0	0	0	0	0	0	0	0	0	0	0	0	0	0	0	0	0	0	0									701	0	0	0	0	0	0	0	0	0	0	0	0	0	0	0	0	0	0	0
	702	0	0	0	0	0	0	0	0	0	0	0	0	0	0	0	0	0	0	0	0									702	0	0	0	0	0	0	0	0	0	0	0	0	0	0	0	0	0	0	0
	703	0	0	0	0	0	0	0	0	0	0	0	0	0	0	0	0	0	0	0	0									703	0	0	0	0	0	0	0	0	0	0	0	0	0	0	0	0	0	0	0
	704	0	0	0	0	0	0	0	0	0	0	0	0	0	0	0	0	0	0	0	0									704	0	0	0	0	0	0	0	0	0	0	0	0	0	0	0	0	0	0	0
	705	0	0	0	0	0	0	0	0	0	0	0	0	0	0	0	0	0	0	0	0									705	0	0	0	0	0	0	0	0	0	0	0	0	0	0	0	0	0	0	0
	706	0	0	0	0	0	0	0	0	0	0	0	0	0	0	0	0	0	0	0	0									706	0	0	0	0	0	0	0	0	0	0	0	0	0	0	0	0	0	0	0
	707	0	0	0	0	0	0	0	0	0	0	0	0	0	0	0	0	0	0	0	0									707	0	0	0	0	0	0	0	0	0	0	0	0	0	0	0	0	0	0	0
	708	0	0	0	0	0	0	0	0	0	0	0	0	0	0	0	0	0	0	0	0									708	0	0	0	0	0	0	0	0	0	0	0	0	0	0	0	0	0	0	0
	709	0	0	0	0	0	0	0	0	0	0	0	0	0	0	0	0	0	0	0	0									709	0	0	0	0	0	0	0	0	0	0	0	0	0	0	0	0	0	0	0
	710	0	0	0	0	0	0	0	0	0	0	0	0	0	0	0	0	0	0	0	0									710	0	0	0	0	0	0	0	0	0	0	0	0	0	0	0	0	0	0	0
	711	0	0	0	0	0	0	0	0	0	0	0	0	0	0	0	0	0	0	0	0									711	0	0	0	0	0	0	0	0	0	0	0	0	0	0	0	0	0	0	0
	712	0	0	0	0	0	0	0	0	0	0	0	0	0	0	0	0	0	0	0	0									712	0	0	0	0	0	0	0	0	0	0	0	0	0	0	0	0	0	0	0
	713	0	0	0	0	0	0	0	0	0	0	0	0	0	0	0	0	0	0	0	0									713	0	0	0	0	0	0	0	0	0	0	0	0	0	0	0	0	0	0	0
	714	0	0	0	0	0	0	0	0	0	0	0	0	0	0	0	0	0	0	0	0									714	0	0	0	0	0	0	0	0	0	0	0	0	0	0	0	0	0	0	0
	715	0	0	0	0	0	0	0	0	0	0	0	0	0	0	0	0	0	0	0	0									715	0	0	0	0	0	0	0	0	0	0	0	0	0	0	0	0	0	0	0
	716	0	0	0	0	0	0	0	0	0	0	0	0	0	0	0	0	0	0	0	0									716	0	0	0	0	0	0	0	0	0	0	0	0	0	0	0	0	0	0	0
	717	0	0	0	0	0	0	0	0	0	0	0	0	0	0	0	0	0	0	0	0									717	0	0	0	0	0	0	0	0	0	0	0	0	0	0	0	0	0	0	0
	718	0	0	0	0	0	0	0	0	0	0	0	0	0	0	0	0	0	0	0	0									718	0	0	0	0	0	0	0	0	0	0	0	0	0	0	0	0	0	0	0
	719	0	0	0	0	0	0	0	0	0	0	0	0	0	0	0	0	0	0	0	0									719	0	0	0	0	0	0	0	0	0	0	0	0	0	0	0	0	0	0	0
	720	0	0	0	0	0	0	0	0	0	0	0	0	0	0	0	0	0	0	0	0									720	0	0	0	0	0	0	0	0	0	0	0	0	0	0	0	0	0	0	0
	721	0	0	0	0	0	0	0	0	0	0	0	0	0	0	0	0	0	0	0	0									721	0	0	0	0	0	0	0	0	0	0	0	0	0	0	0	0	0	0	0
	722	0	0	0	0	0	0	0	0	0	0	0	0	0	0	0	0	0	0	0	0									722	0	0	0	0	0	0	0	0	0	0	0	0	0	0	0	0	0	0	0
	723	0	0	0	0	0	0	0	0	0	0	0	0	0	0	0	0	0	0	0	0									723	0	0	0	0	0	0	0	0	0	0	0	0	0	0	0	0	0	0	0
	724	0	0	0	0	0	0	0	0	0	0	0	0	0	0	0	0	0	0	0	0									724	0	0	0	0	0	0	0	0	0	0	0	0	0	0	0	0	0	0	0
	725	0	0	0	0	0	0	0	0	0	0	0	0	0	0	0	0	0	0	0	0									725	0	0	0	0	0	0	0	0	0	0	0	0	0	0	0	0	0	0	0
	726	0	0	0	0	0	0	0	0	0	0	0	0	0	0	0	0	0	0	0	0									726	0	0	0	0	0	0	0	0	0	0	0	0	0	0	0	0	0	0	0
	727	0	0	0	0	0	0	0	0	0	0	0	0	0	0	0	0	0	0	0	0									727	0	0	0	0	0	0	0	0	0	0	0	0	0	0	0	0	0	0	0
	728	0	0	0	0	0	0	0	0	0	0	0	0	0	0	0	0	0	0	0	0									728	0	0	0	0	0	0	0	0	0	0	0	0	0	0	0	0	0	0	0
	729	0	0	0	0	0	0	0	0	0	0	0	0	0	0	0	0	0	0	0	0									729	0	0	0	0	0	0	0	0	0	0	0	0	0	0	0	0	0	0	0
	730	0	0	0	0	0	0	0	0	0	0	0	0	0	0	0	0	0	0	0	0									730	0	0	0	0	0	0	0	0	0	0	0	0	0	0	0	0	0	0	0
	731	0	0	0	0	0	0	0	0	0	0	0	0	0	0	0	0	0	0	0	0									731	0	0	0	0	0	0	0	0	0	0	0	0	0	0	0	0	0	0	0
	732	0	0	0	0	0	0	0	0	0	0	0	0	0	0	0	0	0	0	0	0									732	0	0	0	0	0	0	0	0	0	0	0	0	0	0	0	0	0	0	0
	733	0	0	0	0	0	0	0	0	0	0	0	0	0	0	0	0	0	0	0	0									733	0	0	0	0	0	0	0	0	0	0	0	0	0	0	0	0	0	0	0
	734	0	0	0	0	0	0	0	0	0	0	0	0	0	0	0	0	0	0	0	0									734	0	0	0	0	0	0	0	0	0	0	0	0	0	0	0	0	0	0	0
	735	0	0	0	0	0	0	0	0	0	0	0	0	0	0	0	0	0	0	0	0									735	0	0	0	0	0	0	0	0	0	0	0	0	0	0	0	0	0	0	0
	736	0	0	0	0	0	0	0	0	0	0	0	0	0	0	0	0	0	0	0	0									736	0	0	0	0	0	0	0	0	0	0	0	0	0	0	0	0	0	0	0
	737	0	0	0	0	0	0	0	0	0	0	0	0	0	0	0	0	0	0	0	0									737	0	0	0	0	0	0	0	0	0	0	0	0	0	0	0	0	0	0	0
	738	0	0	0	0	0	0	0	0	0	0	0	0	0	0	0	0	0	0	0	0									738	0	0	0	0	0	0	0	0	0	0	0	0	0	0	0	0	0	0	0
	739	0	0	0	0	0	0	0	0	0	0	0	0	0	0	0	0	0	0	0	0									739	0	0	0	0	0	0	0	0	0	0	0	0	0	0	0	0	0	0	0
	740	0	0	0	0	0	0	0	0	0	0	0	0	0	0	0	0	0	0	0	0									740	0	0	0	0	0	0	0	0	0	0	0	0	0	0	0	0	0	0	0
	741	0	0	0	0	0	0	0	0	0	0	0	0	0	0	0	0	0	0	0	0									741	0	0	0	0	0	0	0	0	0	0	0	0	0	0	0	0	0	0	0
	742	0	0	0	0	0	0	0	0	0	0	0	0	0	0	0	0	0	0	0	0									742	0	0	0	0	0	0	0	0	0	0	0	0	0	0	0	0	0	0	0
	743	0	0	0	0	0	0	0	0	0	0	0	0	0	0	0	0	0	0	0	0									743	0	0	0	0	0	0	0	0	0	0	0	0	0	0	0	0	0	0	0
	744	0	0	0	0	0	0	0	0	0	0	0	0	0	0	0	0	0	0	0	0									744	0	0	0	0	0	0	0	0	0	0	0	0	0	0	0	0	0	0	0
	745	0	0	0	0	0	0	0	0	0	0	0	0	0	0	0	0	0	0	0	0									745	0	0	0	0	0	0	0	0	0	0	0	0	0	0	0	0	0	0	0
	746	0	0	0	0	0	0	0	0	0	0	0	0	0	0	0	0	0	0	0	0									746	0	0	0	0	0	0	0	0	0	0	0	0	0	0	0	0	0	0	0
	747	0	0	0	0	0	0	0	0	0	0	0	0	0	0	0	0	0	0	0	0									747	0	0	0	0	0	0	0	0	0	0	0	0	0	0	0	0	0	0	0
	748	0	0	0	0	0	0	0	0	0	0	0	0	0	0	0	0	0	0	0	0									748	0	0	0	0	0	0	0	0	0	0	0	0	0	0	0	0	0	0	0
	749	0	0	0	0	0	0	0	0	0	0	0	0	0	0	0	0	0	0	0	0									749	0	0	0	0	0	0	0	0	0	0	0	0	0	0	0	0	0	0	0
	750	0	0	0	0	0	0	0	0	0	0	0	0	0	0	0	0	0	0	0	0									750	0	0	0	0	0	0	0	0	0	0	0	0	0	0	0	0	0	0	0
	751	0	0	0	0	0	0	0	0	0	0	0	0	0	0	0	0	0	0	0	0									751	0	0	0	0	0	0	0	0	0	0	0	0	0	0	0	0	0	0	0
	752	0	0	0	0	0	0	0	0	0	0	0	0	0	0	0	0	0	0	0	0									752	0	0	0	0	0	0	0	0	0	0	0	0	0	0	0	0	0	0	0
	753	0	0	0	0	0	0	0	0	0	0	0	0	0	0	0	0	0	0	0	0									753	0	0	0	0	0	0	0	0	0	0	0	0	0	0	0	0	0	0	0
	754	0	0	0	0	0	0	0	0	0	0	0	0	0	0	0	0	0	0	0	0									754	0	0	0	0	0	0	0	0	0	0	0	0	0	0	0	0	0	0	0
	755	0	0	0	0	0	0	0	0	0	0	0	0	0	0	0	0	0	0	0	0									755	0	0	0	0	0	0	0	0	0	0	0	0	0	0	0	0	0	0	0
	756	0	0	0	0	0	0	0	0	0	0	0	0	0	0	0	0	0	0	0	0									756	0	0	0	0	0	0	0	0	0	0	0	0	0	0	0	0	0	0	0
	757	0	0	0	0	0	0	0	0	0	0	0	0	0	0	0	0	0	0	0	0									757	0	0	0	0	0	0	0	0	0	0	0	0	0	0	0	0	0	0	0
	758	0	0	0	0	0	0	0	0	0	0	0	0	0	0	0	0	0	0	0	0									758	0	0	0	0	0	0	0	0	0	0	0	0	0	0	0	0	0	0	0
	759	0	0	0	0	0	0	0	0	0	0	0	0	0	0	0	0	0	0	0	0									759	0	0	0	0	0	0	0	0	0	0	0	0	0	0	0	0	0	0	0
	760	0	0	0	0	0	0	0	0	0	0	0	0	0	0	0	0	0	0	0	0									760	0	0	0	0	0	0	0	0	0	0	0	0	0	0	0	0	0	0	0
	761	0	0	0	0	0	0	0	0	0	0	0	0	0	0	0	0	0	0	0	0									761	0	0	0	0	0	0	0	0	0	0	0	0	0	0	0	0	0	0	0
	762	0	0	0	0	0	0	0	0	0	0	0	0	0	0	0	0	0	0	0	0									762	0	0	0	0	0	0	0	0	0	0	0	0	0	0	0	0	0	0	0
	763	0	0	0	0	0	0	0	0	0	0	0	0	0	0	0	0	0	0	0	0									763	0	0	0	0	0	0	0	0	0	0	0	0	0	0	0	0	0	0	0
	764	0	0	0	0	0	0	0	0	0	0	0	0	0	0	0	0	0	0	0	0									764	0	0	0	0	0	0	0	0	0	0	0	0	0	0	0	0	0	0	0
	765	0	0	0	0	0	0	0	0	0	0	0	0	0	0	0	0	0	0	0	0									765	0	0	0	0	0	0	0	0	0	0	0	0	0	0	0	0	0	0	0
	766	0	0	0	0	0	0	0	0	0	0	0	0	0	0	0	0	0	0	0	0									766	0	0	0	0	0	0	0	0	0	0	0	0	0	0	0	0	0	0	0
	767	0	0	0	0	0	0	0	0	0	0	0	0	0	0	0	0	0	0	0	0									767	0	0	0	0	0	0	0	0	0	0	0	0	0	0	0	0	0	0	0
	768	0	0	0	0	0	0	0	0	0	0	0	0	0	0	0	0	0	0	0	0									768	0	0	0	0	0	0	0	0	0	0	0	0	0	0	0	0	0	0	0
	769	0	0	0	0	0	0	0	0	0	0	0	0	0	0	0	0	0	0	0	0									769	0	0	0	0	0	0	0	0	0	0	0	0	0	0	0	0	0	0	0
	770	0	0	0	0	0	0	0	0	0	0	0	0	0	0	0	0	0	0	0	0									770	0	0	0	0	0	0	0	0	0	0	0	0	0	0	0	0	0	0	0
	771	0	0	0	0	0	0	0	0	0	0	0	0	0	0	0	0	0	0	0	0									771	0	0	0	0	0	0	0	0	0	0	0	0	0	0	0	0	0	0	0
	772	0	0	0	0	0	0	0	0	0	0	0	0	0	0	0	0	0	0	0	0									772	0	0	0	0	0	0	0	0	0	0	0	0	0	0	0	0	0	0	0
	773	0	0	0	0	0	0	0	0	0	0	0	0	0	0	0	0	0	0	0	0									773	0	0	0	0	0	0	0	0	0	0	0	0	0	0	0	0	0	0	0
	774	0	0	0	0	0	0	0	0	0	0	0	0	0	0	0	0	0	0	0	0									774	0	0	0	0	0	0	0	0	0	0	0	0	0	0	0	0	0	0	0
	775	0	0	0	0	0	0	0	0	0	0	0	0	0	0	0	0	0	0	0	0									775	0	0	0	0	0	0	0	0	0	0	0	0	0	0	0	0	0	0	0
	776	0	0	0	0	0	0	0	0	0	0	0	0	0	0	0	0	0	0	0	0									776	0	0	0	0	0	0	0	0	0	0	0	0	0	0	0	0	0	0	0
	777	0	0	0	0	0	0	0	0	0	0	0	0	0	0	0	0	0	0	0	0									777	0	0	0	0	0	0	0	0	0	0	0	0	0	0	0	0	0	0	0
	778	0	0	0	0	0	0	0	0	0	0	0	0	0	0	0	0	0	0	0	0									778	0	0	0	0	0	0	0	0	0	0	0	0	0	0	0	0	0	0	0
	779	0	0	0	0	0	0	0	0	0	0	0	0	0	0	0	0	0	0	0	0									779	0	0	0	0	0	0	0	0	0	0	0	0	0	0	0	0	0	0	0
	780	0	0	0	0	0	0	0	0	0	0	0	0	0	0	0	0	0	0	0	0									780	0	0	0	0	0	0	0	0	0	0	0	0	0	0	0	0	0	0	0
	781	0	0	0	0	0	0	0	0	0	0	0	0	0	0	0	0	0	0	0	0									781	0	0	0	0	0	0	0	0	0	0	0	0	0	0	0	0	0	0	0
	782	0	0	0	0	0	0	0	0	0	0	0	0	0	0	0	0	0	0	0	0									782	0	0	0	0	0	0	0	0	0	0	0	0	0	0	0	0	0	0	0
	783	0	0	0	0	0	0	0	0	0	0	0	0	0	0	0	0	0	0	0	0									783	0	0	0	0	0	0	0	0	0	0	0	0	0	0	0	0	0	0	0
	784	0	0	0	0	0	0	0	0	0	0	0	0	0	0	0	0	0	0	0	0									784	0	0	0	0	0	0	0	0	0	0	0	0	0	0	0	0	0	0	0
	785	0	0	0	0	0	0	0	0	0	0	0	0	0	0	0	0	0	0	0	0									785	0	0	0	0	0	0	0	0	0	0	0	0	0	0	0	0	0	0	0
	786	0	0	0	0	0	0	0	0	0	0	0	0	0	0	0	0	0	0	0	0									786	0	0	0	0	0	0	0	0	0	0	0	0	0	0	0	0	0	0	0
	787	0	0	0	0	0	0	0	0	0	0	0	0	0	0	0	0	0	0	0	0									787	0	0	0	0	0	0	0	0	0	0	0	0	0	0	0	0	0	0	0
	788	0	0	0	0	0	0	0	0	0	0	0	0	0	0	0	0	0	0	0	0									788	0	0	0	0	0	0	0	0	0	0	0	0	0	0	0	0	0	0	0
	789	0	0	0	0	0	0	0	0	0	0	0	0	0	0	0	0	0	0	0	0									789	0	0	0	0	0	0	0	0	0	0	0	0	0	0	0	0	0	0	0
	790	0	0	0	0	0	0	0	0	0	0	0	0	0	0	0	0	0	0	0	0									790	0	0	0	0	0	0	0	0	0	0	0	0	0	0	0	0	0	0	0
	791	0	0	0	0	0	0	0	0	0	0	0	0	0	0	0	0	0	0	0	0									791	0	0	0	0	0	0	0	0	0	0	0	0	0	0	0	0	0	0	0
	792	0	0	0	0	0	0	0	0	0	0	0	0	0	0	0	0	0	0	0	0									792	0	0	0	0	0	0	0	0	0	0	0	0	0	0	0	0	0	0	0
	793	0	0	0	0	0	0	0	0	0	0	0	0	0	0	0	0	0	0	0	0									793	0	0	0	0	0	0	0	0	0	0	0	0	0	0	0	0	0	0	0
	794	0	0	0	0	0	0	0	0	0	0	0	0	0	0	0	0	0	0	0	0									794	0	0	0	0	0	0	0	0	0	0	0	0	0	0	0	0	0	0	0
	795	0	0	0	0	0	0	0	0	0	0	0	0	0	0	0	0	0	0	0	0									795	0	0	0	0	0	0	0	0	0	0	0	0	0	0	0	0	0	0	0
	796	0	0	0	0	0	0	0	0	0	0	0	0	0	0	0	0	0	0	0	0									796	0	0	0	0	0	0	0	0	0	0	0	0	0	0	0	0	0	0	0
	797	0	0	0	0	0	0	0	0	0	0	0	0	0	0	0	0	0	0	0	0									797	0	0	0	0	0	0	0	0	0	0	0	0	0	0	0	0	0	0	0
	798	0	0	0	0	0	0	0	0	0	0	0	0	0	0	0	0	0	0	0	0									798	0	0	0	0	0	0	0	0	0	0	0	0	0	0	0	0	0	0	0
	799	0	0	0	0	0	0	0	0	0	0	0	0	0	0	0	0	0	0	0	0									799	0	0	0	0	0	0	0	0	0	0	0	0	0	0	0	0	0	0	0
	800	0	0	0	0	0	0	0	0	0	0	0	0	0	0	0	0	0	0	0	0									800	0	0	0	0	0	0	0	0	0	0	0	0	0	0	0	0	0	0	0
	801	0	0	0	0	0	0	0	0	0	0	0	0	0	0	0	0	0	0	0	0									801	0	0	0	0	0	0	0	0	0	0	0	0	0	0	0	0	0	0	0
	802	0	0	0	0	0	0	0	0	0	0	0	0	0	0	0	0	0	0	0	0									802	0	0	0	0	0	0	0	0	0	0	0	0	0	0	0	0	0	0	0
	803	0	0	0	0	0	0	0	0	0	0	0	0	0	0	0	0	0	0	0	0									803	0	0	0	0	0	0	0	0	0	0	0	0	0	0	0	0	0	0	0
	804	0	0	0	0	0	0	0	0	0	0	0	0	0	0	0	0	0	0	0	0									804	0	0	0	0	0	0	0	0	0	0	0	0	0	0	0	0	0	0	0
	805	0	0	0	0	0	0	0	0	0	0	0	0	0	0	0	0	0	0	0	0									805	0	0	0	0	0	0	0	0	0	0	0	0	0	0	0	0	0	0	0
	806	0	0	0	0	0	0	0	0	0	0	0	0	0	0	0	0	0	0	0	0									806	0	0	0	0	0	0	0	0	0	0	0	0	0	0	0	0	0	0	0
	807	0	0	0	0	0	0	0	0	0	0	0	0	0	0	0	0	0	0	0	0									807	0	0	0	0	0	0	0	0	0	0	0	0	0	0	0	0	0	0	0
	808	0	0	0	0	0	0	0	0	0	0	0	0	0	0	0	0	0	0	0	0									808	0	0	0	0	0	0	0	0	0	0	0	0	0	0	0	0	0	0	0
	809	0	0	0	0	0	0	0	0	0	0	0	0	0	0	0	0	0	0	0	0									809	0	0	0	0	0	0	0	0	0	0	0	0	0	0	0	0	0	0	0
	810	0	0	0	0	0	0	0	0	0	0	0	0	0	0	0	0	0	0	0	0									810	0	0	0	0	0	0	0	0	0	0	0	0	0	0	0	0	0	0	0
	811	0	0	0	0	0	0	0	0	0	0	0	0	0	0	0	0	0	0	0	0									811	0	0	0	0	0	0	0	0	0	0	0	0	0	0	0	0	0	0	0
	812	0	0	0	0	0	0	0	0	0	0	0	0	0	0	0	0	0	0	0	0									812	0	0	0	0	0	0	0	0	0	0	0	0	0	0	0	0	0	0	0
	813	0	0	0	0	0	0	0	0	0	0	0	0	0	0	0	0	0	0	0	0									813	0	0	0	0	0	0	0	0	0	0	0	0	0	0	0	0	0	0	0
	814	0	0	0	0	0	0	0	0	0	0	0	0	0	0	0	0	0	0	0	0									814	0	0	0	0	0	0	0	0	0	0	0	0	0	0	0	0	0	0	0
	815	0	0	0	0	0	0	0	0	0	0	0	0	0	0	0	0	0	0	0	0									815	0	0	0	0	0	0	0	0	0	0	0	0	0	0	0	0	0	0	0
	816	0	0	0	0	0	0	0	0	0	0	0	0	0	0	0	0	0	0	0	0									816	0	0	0	0	0	0	0	0	0	0	0	0	0	0	0	0	0	0	0
	817	0	0	0	0	0	0	0	0	0	0	0	0	0	0	0	0	0	0	0	0									817	0	0	0	0	0	0	0	0	0	0	0	0	0	0	0	0	0	0	0
	818	0	0	0	0	0	0	0	0	0	0	0	0	0	0	0	0	0	0	0	0									818	0	0	0	0	0	0	0	0	0	0	0	0	0	0	0	0	0	0	0
	819	0	0	0	0	0	0	0	0	0	0	0	0	0	0	0	0	0	0	0	0									819	0	0	0	0	0	0	0	0	0	0	0	0	0	0	0	0	0	0	0
	820	0	0	0	0	0	0	0	0	0	0	0	0	0	0	0	0	0	0	0	0									820	0	0	0	0	0	0	0	0	0	0	0	0	0	0	0	0	0	0	0
	821	0	0	0	0	0	0	0	0	0	0	0	0	0	0	0	0	0	0	0	0									821	0	0	0	0	0	0	0	0	0	0	0	0	0	0	0	0	0	0	0
	822	0	0	0	0	0	0	0	0	0	0	0	0	0	0	0	0	0	0	0	0									822	0	0	0	0	0	0	0	0	0	0	0	0	0	0	0	0	0	0	0
	823	0	0	0	0	0	0	0	0	0	0	0	0	0	0	0	0	0	0	0	0									823	0	0	0	0	0	0	0	0	0	0	0	0	0	0	0	0	0	0	0
	824	0	0	0	0	0	0	0	0	0	0	0	0	0	0	0	0	0	0	0	0									824	0	0	0	0	0	0	0	0	0	0	0	0	0	0	0	0	0	0	0
	825	0	0	0	0	0	0	0	0	0	0	0	0	0	0	0	0	0	0	0	0									825	0	0	0	0	0	0	0	0	0	0	0	0	0	0	0	0	0	0	0
	826	0	0	0	0	0	0	0	0	0	0	0	0	0	0	0	0	0	0	0	0									826	0	0	0	0	0	0	0	0	0	0	0	0	0	0	0	0	0	0	0
	827	0	0	0	0	0	0	0	0	0	0	0	0	0	0	0	0	0	0	0	0									827	0	0	0	0	0	0	0	0	0	0	0	0	0	0	0	0	0	0	0
	828	0	0	0	0	0	0	0	0	0	0	0	0	0	0	0	0	0	0	0	0									828	0	0	0	0	0	0	0	0	0	0	0	0	0	0	0	0	0	0	0
	829	0	0	0	0	0	0	0	0	0	0	0	0	0	0	0	0	0	0	0	0									829	0	0	0	0	0	0	0	0	0	0	0	0	0	0	0	0	0	0	0
	830	0	0	0	0	0	0	0	0	0	0	0	0	0	0	0	0	0	0	0	0									830	0	0	0	0	0	0	0	0	0	0	0	0	0	0	0	0	0	0	0
	831	0	0	0	0	0	0	0	0	0	0	0	0	0	0	0	0	0	0	0	0									831	0	0	0	0	0	0	0	0	0	0	0	0	0	0	0	0	0	0	0
	832	0	0	0	0	0	0	0	0	0	0	0	0	0	0	0	0	0	0	0	0									832	0	0	0	0	0	0	0	0	0	0	0	0	0	0	0	0	0	0	0
	833	0	0	0	0	0	0	0	0	0	0	0	0	0	0	0	0	0	0	0	0									833	0	0	0	0	0	0	0	0	0	0	0	0	0	0	0	0	0	0	0
	834	0	0	0	0	0	0	0	0	0	0	0	0	0	0	0	0	0	0	0	0									834	0	0	0	0	0	0	0	0	0	0	0	0	0	0	0	0	0	0	0
	835	0	0	0	0	0	0	0	0	0	0	0	0	0	0	0	0	0	0	0	0									835	0	0	0	0	0	0	0	0	0	0	0	0	0	0	0	0	0	0	0
	836	0	0	0	0	0	0	0	0	0	0	0	0	0	0	0	0	0	0	0	0									836	0	0	0	0	0	0	0	0	0	0	0	0	0	0	0	0	0	0	0
	837	0	0	0	0	0	0	0	0	0	0	0	0	0	0	0	0	0	0	0	0									837	0	0	0	0	0	0	0	0	0	0	0	0	0	0	0	0	0	0	0
	838	0	0	0	0	0	0	0	0	0	0	0	0	0	0	0	0	0	0	0	0									838	0	0	0	0	0	0	0	0	0	0	0	0	0	0	0	0	0	0	0
	839	0	0	0	0	0	0	0	0	0	0	0	0	0	0	0	0	0	0	0	0									839	0	0	0	0	0	0	0	0	0	0	0	0	0	0	0	0	0	0	0
	840	0	0	0	0	0	0	0	0	0	0	0	0	0	0	0	0	0	0	0	0									840	0	0	0	0	0	0	0	0	0	0	0	0	0	0	0	0	0	0	0
	841	0	0	0	0	0	0	0	0	0	0	0	0	0	0	0	0	0	0	0	0									841	0	0	0	0	0	0	0	0	0	0	0	0	0	0	0	0	0	0	0
	842	0	0	0	0	0	0	0	0	0	0	0	0	0	0	0	0	0	0	0	0									842	0	0	0	0	0	0	0	0	0	0	0	0	0	0	0	0	0	0	0
	843	0	0	0	0	0	0	0	0	0	0	0	0	0	0	0	0	0	0	0	0									843	0	0	0	0	0	0	0	0	0	0	0	0	0	0	0	0	0	0	0
	844	0	0	0	0	0	0	0	0	0	0	0	0	0	0	0	0	0	0	0	0									844	0	0	0	0	0	0	0	0	0	0	0	0	0	0	0	0	0	0	0
	845	0	0	0	0	0	0	0	0	0	0	0	0	0	0	0	0	0	0	0	0									845	0	0	0	0	0	0	0	0	0	0	0	0	0	0	0	0	0	0	0
	846	0	0	0	0	0	0	0	0	0	0	0	0	0	0	0	0	0	0	0	0									846	0	0	0	0	0	0	0	0	0	0	0	0	0	0	0	0	0	0	0
	847	0	0	0	0	0	0	0	0	0	0	0	0	0	0	0	0	0	0	0	0									847	0	0	0	0	0	0	0	0	0	0	0	0	0	0	0	0	0	0	0
	848	0	0	0	0	0	0	0	0	0	0	0	0	0	0	0	0	0	0	0	0									848	0	0	0	0	0	0	0	0	0	0	0	0	0	0	0	0	0	0	0
	849	0	0	0	0	0	0	0	0	0	0	0	0	0	0	0	0	0	0	0	0									849	0	0	0	0	0	0	0	0	0	0	0	0	0	0	0	0	0	0	0
	850	0	0	0	0	0	0	0	0	0	0	0	0	0	0	0	0	0	0	0	0									850	0	0	0	0	0	0	0	0	0	0	0	0	0	0	0	0	0	0	0
	851	0	0	0	0	0	0	0	0	0	0	0	0	0	0	0	0	0	0	0	0									851	0	0	0	0	0	0	0	0	0	0	0	0	0	0	0	0	0	0	0
	852	0	0	0	0	0	0	0	0	0	0	0	0	0	0	0	0	0	0	0	0									852	0	0	0	0	0	0	0	0	0	0	0	0	0	0	0	0	0	0	0
	853	0	0	0	0	0	0	0	0	0	0	0	0	0	0	0	0	0	0	0	0									853	0	0	0	0	0	0	0	0	0	0	0	0	0	0	0	0	0	0	0
	854	0	0	0	0	0	0	0	0	0	0	0	0	0	0	0	0	0	0	0	0									854	0	0	0	0	0	0	0	0	0	0	0	0	0	0	0	0	0	0	0
	855	0	0	0	0	0	0	0	0	0	0	0	0	0	0	0	0	0	0	0	0									855	0	0	0	0	0	0	0	0	0	0	0	0	0	0	0	0	0	0	0
	856	0	0	0	0	0	0	0	0	0	0	0	0	0	0	0	0	0	0	0	0									856	0	0	0	0	0	0	0	0	0	0	0	0	0	0	0	0	0	0	0
	857	0	0	0	0	0	0	0	0	0	0	0	0	0	0	0	0	0	0	0	0									857	0	0	0	0	0	0	0	0	0	0	0	0	0	0	0	0	0	0	0
	858	0	0	0	0	0	0	0	0	0	0	0	0	0	0	0	0	0	0	0	0									858	0	0	0	0	0	0	0	0	0	0	0	0	0	0	0	0	0	0	0
	859	0	0	0	0	0	0	0	0	0	0	0	0	0	0	0	0	0	0	0	0									859	0	0	0	0	0	0	0	0	0	0	0	0	0	0	0	0	0	0	0
	860	0	0	0	0	0	0	0	0	0	0	0	0	0	0	0	0	0	0	0	0									860	0	0	0	0	0	0	0	0	0	0	0	0	0	0	0	0	0	0	0
	861	0	0	0	0	0	0	0	0	0	0	0	0	0	0	0	0	0	0	0	0									861	0	0	0	0	0	0	0	0	0	0	0	0	0	0	0	0	0	0	0
	862	0	0	0	0	0	0	0	0	0	0	0	0	0	0	0	0	0	0	0	0									862	0	0	0	0	0	0	0	0	0	0	0	0	0	0	0	0	0	0	0
	863	0	0	0	0	0	0	0	0	0	0	0	0	0	0	0	0	0	0	0	0									863	0	0	0	0	0	0	0	0	0	0	0	0	0	0	0	0	0	0	0
	864	0	0	0	0	0	0	0	0	0	0	0	0	0	0	0	0	0	0	0	0									864	0	0	0	0	0	0	0	0	0	0	0	0	0	0	0	0	0	0	0
	865	0	0	0	0	0	0	0	0	0	0	0	0	0	0	0	0	0	0	0	0									865	0	0	0	0	0	0	0	0	0	0	0	0	0	0	0	0	0	0	0
	866	0	0	0	0	0	0	0	0	0	0	0	0	0	0	0	0	0	0	0	0									866	0	0	0	0	0	0	0	0	0	0	0	0	0	0	0	0	0	0	0
	867	0	0	0	0	0	0	0	0	0	0	0	0	0	0	0	0	0	0	0	0									867	0	0	0	0	0	0	0	0	0	0	0	0	0	0	0	0	0	0	0
	868	0	0	0	0	0	0	0	0	0	0	0	0	0	0	0	0	0	0	0	0									868	0	0	0	0	0	0	0	0	0	0	0	0	0	0	0	0	0	0	0
	869	0	0	0	0	0	0	0	0	0	0	0	0	0	0	0	0	0	0	0	0									869	0	0	0	0	0	0	0	0	0	0	0	0	0	0	0	0	0	0	0
	870	0	0	0	0	0	0	0	0	0	0	0	0	0	0	0	0	0	0	0	0									870	0	0	0	0	0	0	0	0	0	0	0	0	0	0	0	0	0	0	0
	871	0	0	0	0	0	0	0	0	0	0	0	0	0	0	0	0	0	0	0	0									871	0	0	0	0	0	0	0	0	0	0	0	0	0	0	0	0	0	0	0
	872	0	0	0	0	0	0	0	0	0	0	0	0	0	0	0	0	0	0	0	0									872	0	0	0	0	0	0	0	0	0	0	0	0	0	0	0	0	0	0	0
	873	0	0	0	0	0	0	0	0	0	0	0	0	0	0	0	0	0	0	0	0									873	0	0	0	0	0	0	0	0	0	0	0	0	0	0	0	0	0	0	0
	874	0	0	0	0	0	0	0	0	0	0	0	0	0	0	0	0	0	0	0	0									874	0	0	0	0	0	0	0	0	0	0	0	0	0	0	0	0	0	0	0
	875	0	0	0	0	0	0	0	0	0	0	0	0	0	0	0	0	0	0	0	0									875	0	0	0	0	0	0	0	0	0	0	0	0	0	0	0	0	0	0	0
	876	0	0	0	0	0	0	0	0	0	0	0	0	0	0	0	0	0	0	0	0									876	0	0	0	0	0	0	0	0	0	0	0	0	0	0	0	0	0	0	0
	877	0	0	0	0	0	0	0	0	0	0	0	0	0	0	0	0	0	0	0	0									877	0	0	0	0	0	0	0	0	0	0	0	0	0	0	0	0	0	0	0
	878	0	0	0	0	0	0	0	0	0	0	0	0	0	0	0	0	0	0	0	0									878	0	0	0	0	0	0	0	0	0	0	0	0	0	0	0	0	0	0	0
	879	0	0	0	0	0	0	0	0	0	0	0	0	0	0	0	0	0	0	0	0									879	0	0	0	0	0	0	0	0	0	0	0	0	0	0	0	0	0	0	0
	880	0	0	0	0	0	0	0	0	0	0	0	0	0	0	0	0	0	0	0	0									880	0	0	0	0	0	0	0	0	0	0	0	0	0	0	0	0	0	0	0
	881	0	0	0	0	0	0	0	0	0	0	0	0	0	0	0	0	0	0	0	0									881	0	0	0	0	0	0	0	0	0	0	0	0	0	0	0	0	0	0	0
	882	0	0	0	0	0	0	0	0	0	0	0	0	0	0	0	0	0	0	0	0									882	0	0	0	0	0	0	0	0	0	0	0	0	0	0	0	0	0	0	0
	883	0	0	0	0	0	0	0	0	0	0	0	0	0	0	0	0	0	0	0	0									883	0	0	0	0	0	0	0	0	0	0	0	0	0	0	0	0	0	0	0
	884	0	0	0	0	0	0	0	0	0	0	0	0	0	0	0	0	0	0	0	0									884	0	0	0	0	0	0	0	0	0	0	0	0	0	0	0	0	0	0	0
	885	0	0	0	0	0	0	0	0	0	0	0	0	0	0	0	0	0	0	0	0									885	0	0	0	0	0	0	0	0	0	0	0	0	0	0	0	0	0	0	0
	886	0	0	0	0	0	0	0	0	0	0	0	0	0	0	0	0	0	0	0	0									886	0	0	0	0	0	0	0	0	0	0	0	0	0	0	0	0	0	0	0
	887	0	0	0	0	0	0	0	0	0	0	0	0	0	0	0	0	0	0	0	0									887	0	0	0	0	0	0	0	0	0	0	0	0	0	0	0	0	0	0	0
	888	0	0	0	0	0	0	0	0	0	0	0	0	0	0	0	0	0	0	0	0									888	0	0	0	0	0	0	0	0	0	0	0	0	0	0	0	0	0	0	0
	889	0	0	0	0	0	0	0	0	0	0	0	0	0	0	0	0	0	0	0	0									889	0	0	0	0	0	0	0	0	0	0	0	0	0	0	0	0	0	0	0
	890	0	0	0	0	0	0	0	0	0	0	0	0	0	0	0	0	0	0	0	0									890	0	0	0	0	0	0	0	0	0	0	0	0	0	0	0	0	0	0	0
	891	0	0	0	0	0	0	0	0	0	0	0	0	0	0	0	0	0	0	0	0									891	0	0	0	0	0	0	0	0	0	0	0	0	0	0	0	0	0	0	0
	892	0	0	0	0	0	0	0	0	0	0	0	0	0	0	0	0	0	0	0	0									892	0	0	0	0	0	0	0	0	0	0	0	0	0	0	0	0	0	0	0
	893	0	0	0	0	0	0	0	0	0	0	0	0	0	0	0	0	0	0	0	0									893	0	0	0	0	0	0	0	0	0	0	0	0	0	0	0	0	0	0	0
	894	0	0	0	0	0	0	0	0	0	0	0	0	0	0	0	0	0	0	0	0									894	0	0	0	0	0	0	0	0	0	0	0	0	0	0	0	0	0	0	0
	895	0	0	0	0	0	0	0	0	0	0	0	0	0	0	0	0	0	0	0	0									895	0	0	0	0	0	0	0	0	0	0	0	0	0	0	0	0	0	0	0
	896	0	0	0	0	0	0	0	0	0	0	0	0	0	0	0	0	0	0	0	0									896	0	0	0	0	0	0	0	0	0	0	0	0	0	0	0	0	0	0	0
	897	0	0	0	0	0	0	0	0	0	0	0	0	0	0	0	0	0	0	0	0									897	0	0	0	0	0	0	0	0	0	0	0	0	0	0	0	0	0	0	0
	898	0	0	0	0	0	0	0	0	0	0	0	0	0	0	0	0	0	0	0	0									898	0	0	0	0	0	0	0	0	0	0	0	0	0	0	0	0	0	0	0
	899	0	0	0	0	0	0	0	0	0	0	0	0	0	0	0	0	0	0	0	0									899	0	0	0	0	0	0	0	0	0	0	0	0	0	0	0	0	0	0	0
	900	0	0	0	0	0	0	0	0	0	0	0	0	0	0	0	0	0	0	0	0									900	0	0	0	0	0	0	0	0	0	0	0	0	0	0	0	0	0	0	0
	901	0	0	0	0	0	0	0	0	0	0	0	0	0	0	0	0	0	0	0	0									901	0	0	0	0	0	0	0	0	0	0	0	0	0	0	0	0	0	0	0
	902	0	0	0	0	0	0	0	0	0	0	0	0	0	0	0	0	0	0	0	0									902	0	0	0	0	0	0	0	0	0	0	0	0	0	0	0	0	0	0	0
	903	0	0	0	0	0	0	0	0	0	0	0	0	0	0	0	0	0	0	0	0									903	0	0	0	0	0	0	0	0	0	0	0	0	0	0	0	0	0	0	0
	904	0	0	0	0	0	0	0	0	0	0	0	0	0	0	0	0	0	0	0	0									904	0	0	0	0	0	0	0	0	0	0	0	0	0	0	0	0	0	0	0
	905	0	0	0	0	0	0	0	0	0	0	0	0	0	0	0	0	0	0	0	0									905	0	0	0	0	0	0	0	0	0	0	0	0	0	0	0	0	0	0	0
	906	0	0	0	0	0	0	0	0	0	0	0	0	0	0	0	0	0	0	0	0									906	0	0	0	0	0	0	0	0	0	0	0	0	0	0	0	0	0	0	0
	907	0	0	0	0	0	0	0	0	0	0	0	0	0	0	0	0	0	0	0	0									907	0	0	0	0	0	0	0	0	0	0	0	0	0	0	0	0	0	0	0
	908	0	0	0	0	0	0	0	0	0	0	0	0	0	0	0	0	0	0	0	0									908	0	0	0	0	0	0	0	0	0	0	0	0	0	0	0	0	0	0	0
	909	0	0	0	0	0	0	0	0	0	0	0	0	0	0	0	0	0	0	0	0									909	0	0	0	0	0	0	0	0	0	0	0	0	0	0	0	0	0	0	0
	910	0	0	0	0	0	0	0	0	0	0	0	0	0	0	0	0	0	0	0	0									910	0	0	0	0	0	0	0	0	0	0	0	0	0	0	0	0	0	0	0
	911	0	0	0	0	0	0	0	0	0	0	0	0	0	0	0	0	0	0	0	0									911	0	0	0	0	0	0	0	0	0	0	0	0	0	0	0	0	0	0	0
	912	0	0	0	0	0	0	0	0	0	0	0	0	0	0	0	0	0	0	0	0									912	0	0	0	0	0	0	0	0	0	0	0	0	0	0	0	0	0	0	0
	913	0	0	0	0	0	0	0	0	0	0	0	0	0	0	0	0	0	0	0	0									913	0	0	0	0	0	0	0	0	0	0	0	0	0	0	0	0	0	0	0
	914	0	0	0	0	0	0	0	0	0	0	0	0	0	0	0	0	0	0	0	0									914	0	0	0	0	0	0	0	0	0	0	0	0	0	0	0	0	0	0	0
	915	0	0	0	0	0	0	0	0	0	0	0	0	0	0	0	0	0	0	0	0									915	0	0	0	0	0	0	0	0	0	0	0	0	0	0	0	0	0	0	0
	916	0	0	0	0	0	0	0	0	0	0	0	0	0	0	0	0	0	0	0	0									916	0	0	0	0	0	0	0	0	0	0	0	0	0	0	0	0	0	0	0
	917	0	0	0	0	0	0	0	0	0	0	0	0	0	0	0	0	0	0	0	0									917	0	0	0	0	0	0	0	0	0	0	0	0	0	0	0	0	0	0	0
	918	0	0	0	0	0	0	0	0	0	0	0	0	0	0	0	0	0	0	0	0									918	0	0	0	0	0	0	0	0	0	0	0	0	0	0	0	0	0	0	0
	919	0	0	0	0	0	0	0	0	0	0	0	0	0	0	0	0	0	0	0	0									919	0	0	0	0	0	0	0	0	0	0	0	0	0	0	0	0	0	0	0
	920	0	0	0	0	0	0	0	0	0	0	0	0	0	0	0	0	0	0	0	0									920	0	0	0	0	0	0	0	0	0	0	0	0	0	0	0	0	0	0	0
	921	0	0	0	0	0	0	0	0	0	0	0	0	0	0	0	0	0	0	0	0									921	0	0	0	0	0	0	0	0	0	0	0	0	0	0	0	0	0	0	0
	922	0	0	0	0	0	0	0	0	0	0	0	0	0	0	0	0	0	0	0	0									922	0	0	0	0	0	0	0	0	0	0	0	0	0	0	0	0	0	0	0
	923	0	0	0	0	0	0	0	0	0	0	0	0	0	0	0	0	0	0	0	0									923	0	0	0	0	0	0	0	0	0	0	0	0	0	0	0	0	0	0	0
	924	0	0	0	0	0	0	0	0	0	0	0	0	0	0	0	0	0	0	0	0									924	0	0	0	0	0	0	0	0	0	0	0	0	0	0	0	0	0	0	0
	925	0	0	0	0	0	0	0	0	0	0	0	0	0	0	0	0	0	0	0	0									925	0	0	0	0	0	0	0	0	0	0	0	0	0	0	0	0	0	0	0
	926	0	0	0	0	0	0	0	0	0	0	0	0	0	0	0	0	0	0	0	0									926	0	0	0	0	0	0	0	0	0	0	0	0	0	0	0	0	0	0	0
	927	0	0	0	0	0	0	0	0	0	0	0	0	0	0	0	0	0	0	0	0									927	0	0	0	0	0	0	0	0	0	0	0	0	0	0	0	0	0	0	0
	928	0	0	0	0	0	0	0	0	0	0	0	0	0	0	0	0	0	0	0	0									928	0	0	0	0	0	0	0	0	0	0	0	0	0	0	0	0	0	0	0
	929	0	0	0	0	0	0	0	0	0	0	0	0	0	0	0	0	0	0	0	0									929	0	0	0	0	0	0	0	0	0	0	0	0	0	0	0	0	0	0	0
	930	0	0	0	0	0	0	0	0	0	0	0	0	0	0	0	0	0	0	0	0									930	0	0	0	0	0	0	0	0	0	0	0	0	0	0	0	0	0	0	0
	931	0	0	0	0	0	0	0	0	0	0	0	0	0	0	0	0	0	0	0	0									931	0	0	0	0	0	0	0	0	0	0	0	0	0	0	0	0	0	0	0
	932	0	0	0	0	0	0	0	0	0	0	0	0	0	0	0	0	0	0	0	0									932	0	0	0	0	0	0	0	0	0	0	0	0	0	0	0	0	0	0	0
	933	0	0	0	0	0	0	0	0	0	0	0	0	0	0	0	0	0	0	0	0									933	0	0	0	0	0	0	0	0	0	0	0	0	0	0	0	0	0	0	0
	934	0	0	0	0	0	0	0	0	0	0	0	0	0	0	0	0	0	0	0	0									934	0	0	0	0	0	0	0	0	0	0	0	0	0	0	0	0	0	0	0
	935	0	0	0	0	0	0	0	0	0	0	0	0	0	0	0	0	0	0	0	0									935	0	0	0	0	0	0	0	0	0	0	0	0	0	0	0	0	0	0	0
	936	0	0	0	0	0	0	0	0	0	0	0	0	0	0	0	0	0	0	0	0									936	0	0	0	0	0	0	0	0	0	0	0	0	0	0	0	0	0	0	0
	937	0	0	0	0	0	0	0	0	0	0	0	0	0	0	0	0	0	0	0	0									937	0	0	0	0	0	0	0	0	0	0	0	0	0	0	0	0	0	0	0
	938	0	0	0	0	0	0	0	0	0	0	0	0	0	0	0	0	0	0	0	0									938	0	0	0	0	0	0	0	0	0	0	0	0	0	0	0	0	0	0	0
	939	0	0	0	0	0	0	0	0	0	0	0	0	0	0	0	0	0	0	0	0									939	0	0	0	0	0	0	0	0	0	0	0	0	0	0	0	0	0	0	0
	940	0	0	0	0	0	0	0	0	0	0	0	0	0	0	0	0	0	0	0	0									940	0	0	0	0	0	0	0	0	0	0	0	0	0	0	0	0	0	0	0
	941	0	0	0	0	0	0	0	0	0	0	0	0	0	0	0	0	0	0	0	0									941	0	0	0	0	0	0	0	0	0	0	0	0	0	0	0	0	0	0	0
	942	0	0	0	0	0	0	0	0	0	0	0	0	0	0	0	0	0	0	0	0									942	0	0	0	0	0	0	0	0	0	0	0	0	0	0	0	0	0	0	0
	943	0	0	0	0	0	0	0	0	0	0	0	0	0	0	0	0	0	0	0	0									943	0	0	0	0	0	0	0	0	0	0	0	0	0	0	0	0	0	0	0
	944	0	0	0	0	0	0	0	0	0	0	0	0	0	0	0	0	0	0	0	0									944	0	0	0	0	0	0	0	0	0	0	0	0	0	0	0	0	0	0	0
	945	0	0	0	0	0	0	0	0	0	0	0	0	0	0	0	0	0	0	0	0									945	0	0	0	0	0	0	0	0	0	0	0	0	0	0	0	0	0	0	0
	946	0	0	0	0	0	0	0	0	0	0	0	0	0	0	0	0	0	0	0	0									946	0	0	0	0	0	0	0	0	0	0	0	0	0	0	0	0	0	0	0
	947	0	0	0	0	0	0	0	0	0	0	0	0	0	0	0	0	0	0	0	0									947	0	0	0	0	0	0	0	0	0	0	0	0	0	0	0	0	0	0	0
	948	0	0	0	0	0	0	0	0	0	0	0	0	0	0	0	0	0	0	0	0									948	0	0	0	0	0	0	0	0	0	0	0	0	0	0	0	0	0	0	0
	949	0	0	0	0	0	0	0	0	0	0	0	0	0	0	0	0	0	0	0	0									949	0	0	0	0	0	0	0	0	0	0	0	0	0	0	0	0	0	0	0
	950	0	0	0	0	0	0	0	0	0	0	0	0	0	0	0	0	0	0	0	0									950	0	0	0	0	0	0	0	0	0	0	0	0	0	0	0	0	0	0	0
	951	0	0	0	0	0	0	0	0	0	0	0	0	0	0	0	0	0	0	0	0									951	0	0	0	0	0	0	0	0	0	0	0	0	0	0	0	0	0	0	0
	952	0	0	0	0	0	0	0	0	0	0	0	0	0	0	0	0	0	0	0	0									952	0	0	0	0	0	0	0	0	0	0	0	0	0	0	0	0	0	0	0
	953	0	0	0	0	0	0	0	0	0	0	0	0	0	0	0	0	0	0	0	0									953	0	0	0	0	0	0	0	0	0	0	0	0	0	0	0	0	0	0	0
	954	0	0	0	0	0	0	0	0	0	0	0	0	0	0	0	0	0	0	0	0									954	0	0	0	0	0	0	0	0	0	0	0	0	0	0	0	0	0	0	0
	955	0	0	0	0	0	0	0	0	0	0	0	0	0	0	0	0	0	0	0	0									955	0	0	0	0	0	0	0	0	0	0	0	0	0	0	0	0	0	0	0
	956	0	0	0	0	0	0	0	0	0	0	0	0	0	0	0	0	0	0	0	0									956	0	0	0	0	0	0	0	0	0	0	0	0	0	0	0	0	0	0	0
	957	0	0	0	0	0	0	0	0	0	0	0	0	0	0	0	0	0	0	0	0									957	0	0	0	0	0	0	0	0	0	0	0	0	0	0	0	0	0	0	0
	958	0	0	0	0	0	0	0	0	0	0	0	0	0	0	0	0	0	0	0	0									958	0	0	0	0	0	0	0	0	0	0	0	0	0	0	0	0	0	0	0
	959	0	0	0	0	0	0	0	0	0	0	0	0	0	0	0	0	0	0	0	0									959	0	0	0	0	0	0	0	0	0	0	0	0	0	0	0	0	0	0	0
	960	0	0	0	0	0	0	0	0	0	0	0	0	0	0	0	0	0	0	0	0									960	0	0	0	0	0	0	0	0	0	0	0	0	0	0	0	0	0	0	0
	961	0	0	0	0	0	0	0	0	0	0	0	0	0	0	0	0	0	0	0	0									961	0	0	0	0	0	0	0	0	0	0	0	0	0	0	0	0	0	0	0
	962	0	0	0	0	0	0	0	0	0	0	0	0	0	0	0	0	0	0	0	0									962	0	0	0	0	0	0	0	0	0	0	0	0	0	0	0	0	0	0	0
	963	0	0	0	0	0	0	0	0	0	0	0	0	0	0	0	0	0	0	0	0									963	0	0	0	0	0	0	0	0	0	0	0	0	0	0	0	0	0	0	0
	964	0	0	0	0	0	0	0	0	0	0	0	0	0	0	0	0	0	0	0	0									964	0	0	0	0	0	0	0	0	0	0	0	0	0	0	0	0	0	0	0
	965	0	0	0	0	0	0	0	0	0	0	0	0	0	0	0	0	0	0	0	0									965	0	0	0	0	0	0	0	0	0	0	0	0	0	0	0	0	0	0	0
	966	0	0	0	0	0	0	0	0	0	0	0	0	0	0	0	0	0	0	0	0									966	0	0	0	0	0	0	0	0	0	0	0	0	0	0	0	0	0	0	0
	967	0	0	0	0	0	0	0	0	0	0	0	0	0	0	0	0	0	0	0	0									967	0	0	0	0	0	0	0	0	0	0	0	0	0	0	0	0	0	0	0
	968	0	0	0	0	0	0	0	0	0	0	0	0	0	0	0	0	0	0	0	0									968	0	0	0	0	0	0	0	0	0	0	0	0	0	0	0	0	0	0	0
	969	0	0	0	0	0	0	0	0	0	0	0	0	0	0	0	0	0	0	0	0									969	0	0	0	0	0	0	0	0	0	0	0	0	0	0	0	0	0	0	0
	970	0	0	0	0	0	0	0	0	0	0	0	0	0	0	0	0	0	0	0	0									970	0	0	0	0	0	0	0	0	0	0	0	0	0	0	0	0	0	0	0
	971	0	0	0	0	0	0	0	0	0	0	0	0	0	0	0	0	0	0	0	0									971	0	0	0	0	0	0	0	0	0	0	0	0	0	0	0	0	0	0	0
	972	0	0	0	0	0	0	0	0	0	0	0	0	0	0	0	0	0	0	0	0									972	0	0	0	0	0	0	0	0	0	0	0	0	0	0	0	0	0	0	0
	973	0	0	0	0	0	0	0	0	0	0	0	0	0	0	0	0	0	0	0	0									973	0	0	0	0	0	0	0	0	0	0	0	0	0	0	0	0	0	0	0
	974	0	0	0	0	0	0	0	0	0	0	0	0	0	0	0	0	0	0	0	0									974	0	0	0	0	0	0	0	0	0	0	0	0	0	0	0	0	0	0	0
	975	0	0	0	0	0	0	0	0	0	0	0	0	0	0	0	0	0	0	0	0									975	0	0	0	0	0	0	0	0	0	0	0	0	0	0	0	0	0	0	0
	976	0	0	0	0	0	0	0	0	0	0	0	0	0	0	0	0	0	0	0	0									976	0	0	0	0	0	0	0	0	0	0	0	0	0	0	0	0	0	0	0
	977	0	0	0	0	0	0	0	0	0	0	0	0	0	0	0	0	0	0	0	0									977	0	0	0	0	0	0	0	0	0	0	0	0	0	0	0	0	0	0	0
	978	0	0	0	0	0	0	0	0	0	0	0	0	0	0	0	0	0	0	0	0									978	0	0	0	0	0	0	0	0	0	0	0	0	0	0	0	0	0	0	0
	979	0	0	0	0	0	0	0	0	0	0	0	0	0	0	0	0	0	0	0	0									979	0	0	0	0	0	0	0	0	0	0	0	0	0	0	0	0	0	0	0
	980	0	0	0	0	0	0	0	0	0	0	0	0	0	0	0	0	0	0	0	0									980	0	0	0	0	0	0	0	0	0	0	0	0	0	0	0	0	0	0	0
	981	0	0	0	0	0	0	0	0	0	0	0	0	0	0	0	0	0	0	0	0									981	0	0	0	0	0	0	0	0	0	0	0	0	0	0	0	0	0	0	0
	982	0	0	0	0	0	0	0	0	0	0	0	0	0	0	0	0	0	0	0	0									982	0	0	0	0	0	0	0	0	0	0	0	0	0	0	0	0	0	0	0
	983	0	0	0	0	0	0	0	0	0	0	0	0	0	0	0	0	0	0	0	0									983	0	0	0	0	0	0	0	0	0	0	0	0	0	0	0	0	0	0	0
	984	0	0	0	0	0	0	0	0	0	0	0	0	0	0	0	0	0	0	0	0									984	0	0	0	0	0	0	0	0	0	0	0	0	0	0	0	0	0	0	0
	985	0	0	0	0	0	0	0	0	0	0	0	0	0	0	0	0	0	0	0	0									985	0	0	0	0	0	0	0	0	0	0	0	0	0	0	0	0	0	0	0
	986	0	0	0	0	0	0	0	0	0	0	0	0	0	0	0	0	0	0	0	0									986	0	0	0	0	0	0	0	0	0	0	0	0	0	0	0	0	0	0	0
	987	0	0	0	0	0	0	0	0	0	0	0	0	0	0	0	0	0	0	0	0									987	0	0	0	0	0	0	0	0	0	0	0	0	0	0	0	0	0	0	0
	988	0	0	0	0	0	0	0	0	0	0	0	0	0	0	0	0	0	0	0	0									988	0	0	0	0	0	0	0	0	0	0	0	0	0	0	0	0	0	0	0
	989	0	0	0	0	0	0	0	0	0	0	0	0	0	0	0	0	0	0	0	0									989	0	0	0	0	0	0	0	0	0	0	0	0	0	0	0	0	0	0	0
	990	0	0	0	0	0	0	0	0	0	0	0	0	0	0	0	0	0	0	0	0									990	0	0	0	0	0	0	0	0	0	0	0	0	0	0	0	0	0	0	0
	991	0	0	0	0	0	0	0	0	0	0	0	0	0	0	0	0	0	0	0	0									991	0	0	0	0	0	0	0	0	0	0	0	0	0	0	0	0	0	0	0
	992	0	0	0	0	0	0	0	0	0	0	0	0	0	0	0	0	0	0	0	0									992	0	0	0	0	0	0	0	0	0	0	0	0	0	0	0	0	0	0	0
	993	0	0	0	0	0	0	0	0	0	0	0	0	0	0	0	0	0	0	0	0									993	0	0	0	0	0	0	0	0	0	0	0	0	0	0	0	0	0	0	0
	994	0	0	0	0	0	0	0	0	0	0	0	0	0	0	0	0	0	0	0	0									994	0	0	0	0	0	0	0	0	0	0	0	0	0	0	0	0	0	0	0
	995	0	0	0	0	0	0	0	0	0	0	0	0	0	0	0	0	0	0	0	0									995	0	0	0	0	0	0	0	0	0	0	0	0	0	0	0	0	0	0	0
	996	0	0	0	0	0	0	0	0	0	0	0	0	0	0	0	0	0	0	0	0									996	0	0	0	0	0	0	0	0	0	0	0	0	0	0	0	0	0	0	0
	997	0	0	0	0	0	0	0	0	0	0	0	0	0	0	0	0	0	0	0	0									997	0	0	0	0	0	0	0	0	0	0	0	0	0	0	0	0	0	0	0
	998	0	0	0	0	0	0	0	0	0	0	0	0	0	0	0	0	0	0	0	0									998	0	0	0	0	0	0	0	0	0	0	0	0	0	0	0	0	0	0	0
	999	0	0	0	0	0	0	0	0	0	0	0	0	0	0	0	0	0	0	0	0									999	0	0	0	0	0	0	0	0	0	0	0	0	0	0	0	0	0	0	0
	1000	0	0	0	0	0	0	0	0	0	0	0	0	0	0	0	0	0	0	0	0									1000	0	0	0	0	0	0	0	0	0	0	0	0	0	0	0	0	0	0	0
	1001	0	0	0	0	0	0	0	0	0	0	0	0	0	0	0	0	0	0	0	0									1001	0	0	0	0	0	0	0	0	0	0	0	0	0	0	0	0	0	0	0
	1002	0	0	0	0	0	0	0	0	0	0	0	0	0	0	0	0	0	0	0	0									1002	0	0	0	0	0	0	0	0	0	0	0	0	0	0	0	0	0	0	0
	1003	0	0	0	0	0	0	0	0	0	0	0	0	0	0	0	0	0	0	0	0									1003	0	0	0	0	0	0	0	0	0	0	0	0	0	0	0	0	0	0	0
	1004	0	0	0	0	0	0	0	0	0	0	0	0	0	0	0	0	0	0	0	0									1004	0	0	0	0	0	0	0	0	0	0	0	0	0	0	0	0	0	0	0
	1005	0	0	0	0	0	0	0	0	0	0	0	0	0	0	0	0	0	0	0	0									1005	0	0	0	0	0	0	0	0	0	0	0	0	0	0	0	0	0	0	0
	1006	0	0	0	0	0	0	0	0	0	0	0	0	0	0	0	0	0	0	0	0									1006	0	0	0	0	0	0	0	0	0	0	0	0	0	0	0	0	0	0	0
	1007	0	0	0	0	0	0	0	0	0	0	0	0	0	0	0	0	0	0	0	0									1007	0	0	0	0	0	0	0	0	0	0	0	0	0	0	0	0	0	0	0
	1008	0	0	0	0	0	0	0	0	0	0	0	0	0	0	0	0	0	0	0	0									1008	0	0	0	0	0	0	0	0	0	0	0	0	0	0	0	0	0	0	0
	1009	0	0	0	0	0	0	0	0	0	0	0	0	0	0	0	0	0	0	0	0									1009	0	0	0	0	0	0	0	0	0	0	0	0	0	0	0	0	0	0	0
	1010	0	0	0	0	0	0	0	0	0	0	0	0	0	0	0	0	0	0	0	0									1010	0	0	0	0	0	0	0	0	0	0	0	0	0	0	0	0	0	0	0
	1011	0	0	0	0	0	0	0	0	0	0	0	0	0	0	0	0	0	0	0	0									1011	0	0	0	0	0	0	0	0	0	0	0	0	0	0	0	0	0	0	0
	1012	0	0	0	0	0	0	0	0	0	0	0	0	0	0	0	0	0	0	0	0									1012	0	0	0	0	0	0	0	0	0	0	0	0	0	0	0	0	0	0	0
	1013	0	0	0	0	0	0	0	0	0	0	0	0	0	0	0	0	0	0	0	0									1013	0	0	0	0	0	0	0	0	0	0	0	0	0	0	0	0	0	0	0
	1014	0	0	0	0	0	0	0	0	0	0	0	0	0	0	0	0	0	0	0	0									1014	0	0	0	0	0	0	0	0	0	0	0	0	0	0	0	0	0	0	0
	1015	0	0	0	0	0	0	0	0	0	0	0	0	0	0	0	0	0	0	0	0									1015	0	0	0	0	0	0	0	0	0	0	0	0	0	0	0	0	0	0	0
	1016	0	0	0	0	0	0	0	0	0	0	0	0	0	0	0	0	0	0	0	0									1016	0	0	0	0	0	0	0	0	0	0	0	0	0	0	0	0	0	0	0
	1017	0	0	0	0	0	0	0	0	0	0	0	0	0	0	0	0	0	0	0	0									1017	0	0	0	0	0	0	0	0	0	0	0	0	0	0	0	0	0	0	0
	1018	0	0	0	0	0	0	0	0	0	0	0	0	0	0	0	0	0	0	0	0									1018	0	0	0	0	0	0	0	0	0	0	0	0	0	0	0	0	0	0	0
	1019	0	0	0	0	0	0	0	0	0	0	0	0	0	0	0	0	0	0	0	0									1019	0	0	0	0	0	0	0	0	0	0	0	0	0	0	0	0	0	0	0
	1020	0	0	0	0	0	0	0	0	0	0	0	0	0	0	0	0	0	0	0	0									1020	0	0	0	0	0	0	0	0	0	0	0	0	0	0	0	0	0	0	0
	1021	0	0	0	0	0	0	0	0	0	0	0	0	0	0	0	0	0	0	0	0									1021	0	0	0	0	0	0	0	0	0	0	0	0	0	0	0	0	0	0	0
	1022	0	0	0	0	0	0	0	0	0	0	0	0	0	0	0	0	0	0	0	0									1022	0	0	0	0	0	0	0	0	0	0	0	0	0	0	0	0	0	0	0
	1023	0	0	0	0	0	0	0	0	0	0	0	0	0	0	0	0	0	0	0	0									1023	0	0	0	0	0	0	0	0	0	0	0	0	0	0	0	0	0	0	0
	1024	0	0	0	0	0	0	0	0	0	0	0	0	0	0	0	0	0	0	0	0									1024	0	0	0	0	0	0	0	0	0	0	0	0	0	0	0	0	0	0	0
	1025	0	0	0	0	0	0	0	0	0	0	0	0	0	0	0	0	0	0	0	0									1025	0	0	0	0	0	0	0	0	0	0	0	0	0	0	0	0	0	0	0
	1026	0	0	0	0	0	0	0	0	0	0	0	0	0	0	0	0	0	0	0	0									1026	0	0	0	0	0	0	0	0	0	0	0	0	0	0	0	0	0	0	0
	1027	0	0	0	0	0	0	0	0	0	0	0	0	0	0	0	0	0	0	0	0									1027	0	0	0	0	0	0	0	0	0	0	0	0	0	0	0	0	0	0	0
	1028	0	0	0	0	0	0	0	0	0	0	0	0	0	0	0	0	0	0	0	0									1028	0	0	0	0	0	0	0	0	0	0	0	0	0	0	0	0	0	0	0
	1029	0	0	0	0	0	0	0	0	0	0	0	0	0	0	0	0	0	0	0	0									1029	0	0	0	0	0	0	0	0	0	0	0	0	0	0	0	0	0	0	0
	1030	0	0	0	0	0	0	0	0	0	0	0	0	0	0	0	0	0	0	0	0									1030	0	0	0	0	0	0	0	0	0	0	0	0	0	0	0	0	0	0	0
	1031	0	0	0	0	0	0	0	0	0	0	0	0	0	0	0	0	0	0	0	0									1031	0	0	0	0	0	0	0	0	0	0	0	0	0	0	0	0	0	0	0
	1032	0	0	0	0	0	0	0	0	0	0	0	0	0	0	0	0	0	0	0	0									1032	0	0	0	0	0	0	0	0	0	0	0	0	0	0	0	0	0	0	0
	1033	0	0	0	0	0	0	0	0	0	0	0	0	0	0	0	0	0	0	0	0									1033	0	0	0	0	0	0	0	0	0	0	0	0	0	0	0	0	0	0	0
	1034	0	0	0	0	0	0	0	0	0	0	0	0	0	0	0	0	0	0	0	0									1034	0	0	0	0	0	0	0	0	0	0	0	0	0	0	0	0	0	0	0
	1035	0	0	0	0	0	0	0	0	0	0	0	0	0	0	0	0	0	0	0	0									1035	0	0	0	0	0	0	0	0	0	0	0	0	0	0	0	0	0	0	0
	1036	0	0	0	0	0	0	0	0	0	0	0	0	0	0	0	0	0	0	0	0									1036	0	0	0	0	0	0	0	0	0	0	0	0	0	0	0	0	0	0	0
	1037	0	0	0	0	0	0	0	0	0	0	0	0	0	0	0	0	0	0	0	0									1037	0	0	0	0	0	0	0	0	0	0	0	0	0	0	0	0	0	0	0
	1038	0	0	0	0	0	0	0	0	0	0	0	0	0	0	0	0	0	0	0	0									1038	0	0	0	0	0	0	0	0	0	0	0	0	0	0	0	0	0	0	0
	1039	0	0	0	0	0	0	0	0	0	0	0	0	0	0	0	0	0	0	0	0									1039	0	0	0	0	0	0	0	0	0	0	0	0	0	0	0	0	0	0	0
	1040	0	0	0	0	0	0	0	0	0	0	0	0	0	0	0	0	0	0	0	0									1040	0	0	0	0	0	0	0	0	0	0	0	0	0	0	0	0	0	0	0
	1041	0	0	0	0	0	0	0	0	0	0	0	0	0	0	0	0	0	0	0	0									1041	0	0	0	0	0	0	0	0	0	0	0	0	0	0	0	0	0	0	0
	1042	0	0	0	0	0	0	0	0	0	0	0	0	0	0	0	0	0	0	0	0									1042	0	0	0	0	0	0	0	0	0	0	0	0	0	0	0	0	0	0	0
	1043	0	0	0	0	0	0	0	0	0	0	0	0	0	0	0	0	0	0	0	0									1043	0	0	0	0	0	0	0	0	0	0	0	0	0	0	0	0	0	0	0
	1044	0	0	0	0	0	0	0	0	0	0	0	0	0	0	0	0	0	0	0	0									1044	0	0	0	0	0	0	0	0	0	0	0	0	0	0	0	0	0	0	0
	1045	0	0	0	0	0	0	0	0	0	0	0	0	0	0	0	0	0	0	0	0									1045	0	0	0	0	0	0	0	0	0	0	0	0	0	0	0	0	0	0	0
	1046	0	0	0	0	0	0	0	0	0	0	0	0	0	0	0	0	0	0	0	0									1046	0	0	0	0	0	0	0	0	0	0	0	0	0	0	0	0	0	0	0
	1047	0	0	0	0	0	0	0	0	0	0	0	0	0	0	0	0	0	0	0	0									1047	0	0	0	0	0	0	0	0	0	0	0	0	0	0	0	0	0	0	0
	1048	0	0	0	0	0	0	0	0	0	0	0	0	0	0	0	0	0	0	0	0									1048	0	0	0	0	0	0	0	0	0	0	0	0	0	0	0	0	0	0	0
	1049	0	0	0	0	0	0	0	0	0	0	0	0	0	0	0	0	0	0	0	0									1049	0	0	0	0	0	0	0	0	0	0	0	0	0	0	0	0	0	0	0
	1050	0	0	0	0	0	0	0	0	0	0	0	0	0	0	0	0	0	0	0	0									1050	0	0	0	0	0	0	0	0	0	0	0	0	0	0	0	0	0	0	0
	1051	0	0	0	0	0	0	0	0	0	0	0	0	0	0	0	0	0	0	0	0									1051	0	0	0	0	0	0	0	0	0	0	0	0	0	0	0	0	0	0	0
	1052	0	0	0	0	0	0	0	0	0	0	0	0	0	0	0	0	0	0	0	0									1052	0	0	0	0	0	0	0	0	0	0	0	0	0	0	0	0	0	0	0
	1053	0	0	0	0	0	0	0	0	0	0	0	0	0	0	0	0	0	0	0	0									1053	0	0	0	0	0	0	0	0	0	0	0	0	0	0	0	0	0	0	0
	1054	0	0	0	0	0	0	0	0	0	0	0	0	0	0	0	0	0	0	0	0									1054	0	0	0	0	0	0	0	0	0	0	0	0	0	0	0	0	0	0	0
	1055	0	0	0	0	0	0	0	0	0	0	0	0	0	0	0	0	0	0	0	0									1055	0	0	0	0	0	0	0	0	0	0	0	0	0	0	0	0	0	0	0
	1056	0	0	0	0	0	0	0	0	0	0	0	0	0	0	0	0	0	0	0	0									1056	0	0	0	0	0	0	0	0	0	0	0	0	0	0	0	0	0	0	0
	1057	0	0	0	0	0	0	0	0	0	0	0	0	0	0	0	0	0	0	0	0									1057	0	0	0	0	0	0	0	0	0	0	0	0	0	0	0	0	0	0	0
	1058	0	0	0	0	0	0	0	0	0	0	0	0	0	0	0	0	0	0	0	0									1058	0	0	0	0	0	0	0	0	0	0	0	0	0	0	0	0	0	0	0
	1059	0	0	0	0	0	0	0	0	0	0	0	0	0	0	0	0	0	0	0	0									1059	0	0	0	0	0	0	0	0	0	0	0	0	0	0	0	0	0	0	0
	1060	0	0	0	0	0	0	0	0	0	0	0	0	0	0	0	0	0	0	0	0									1060	0	0	0	0	0	0	0	0	0	0	0	0	0	0	0	0	0	0	0
	1061	0	0	0	0	0	0	0	0	0	0	0	0	0	0	0	0	0	0	0	0									1061	0	0	0	0	0	0	0	0	0	0	0	0	0	0	0	0	0	0	0
	1062	0	0	0	0	0	0	0	0	0	0	0	0	0	0	0	0	0	0	0	0									1062	0	0	0	0	0	0	0	0	0	0	0	0	0	0	0	0	0	0	0
	1063	0	0	0	0	0	0	0	0	0	0	0	0	0	0	0	0	0	0	0	0									1063	0	0	0	0	0	0	0	0	0	0	0	0	0	0	0	0	0	0	0
	1064	0	0	0	0	0	0	0	0	0	0	0	0	0	0	0	0	0	0	0	0									1064	0	0	0	0	0	0	0	0	0	0	0	0	0	0	0	0	0	0	0
	1065	0	0	0	0	0	0	0	0	0	0	0	0	0	0	0	0	0	0	0	0									1065	0	0	0	0	0	0	0	0	0	0	0	0	0	0	0	0	0	0	0
	1066	0	0	0	0	0	0	0	0	0	0	0	0	0	0	0	0	0	0	0	0									1066	0	0	0	0	0	0	0	0	0	0	0	0	0	0	0	0	0	0	0
	1067	0	0	0	0	0	0	0	0	0	0	0	0	0	0	0	0	0	0	0	0									1067	0	0	0	0	0	0	0	0	0	0	0	0	0	0	0	0	0	0	0
	1068	0	0	0	0	0	0	0	0	0	0	0	0	0	0	0	0	0	0	0	0									1068	0	0	0	0	0	0	0	0	0	0	0	0	0	0	0	0	0	0	0
	1069	0	0	0	0	0	0	0	0	0	0	0	0	0	0	0	0	0	0	0	0									1069	0	0	0	0	0	0	0	0	0	0	0	0	0	0	0	0	0	0	0
	1070	0	0	0	0	0	0	0	0	0	0	0	0	0	0	0	0	0	0	0	0
	1071	0	0	0	0	0	0	0	0	0	0	0	0	0	0	0	0	0	0	0	0
	1072	0	0	0	0	0	0	0	0	0	0	0	0	0	0	0	0	0	0	0	0
	1073	0	0	0	0	0	0	0	0	0	0	0	0	0	0	0	0	0	0	0	0
	1074	0	0	0	0	0	0	0	0	0	0	0	0	0	0	0	0	0	0	0	0
	1075	0	0	0	0	0	0	0	0	0	0	0	0	0	0	0	0	0	0	0	0
	1076	0	0	0	0	0	0	0	0	0	0	0	0	0	0	0	0	0	0	0	0
	1077	0	0	0	0	0	0	0	0	0	0	0	0	0	0	0	0	0	0	0	0
	1078	0	0	0	0	0	0	0	0	0	0	0	0	0	0	0	0	0	0	0	0
	1079	0	0	0	0	0	0	0	0	0	0	0	0	0	0	0	0	0	0	0	0
	1080	0	0	0	0	0	0	0	0	0	0	0	0	0	0	0	0	0	0	0	0
	1081	0	0	0	0	0	0	0	0	0	0	0	0	0	0	0	0	0	0	0	0
	1082	0	0	0	0	0	0	0	0	0	0	0	0	0	0	0	0	0	0	0	0
	1083	0	0	0	0	0	0	0	0	0	0	0	0	0	0	0	0	0	0	0	0
	1084	0	0	0	0	0	0	0	0	0	0	0	0	0	0	0	0	0	0	0	0
	1085	0	0	0	0	0	0	0	0	0	0	0	0	0	0	0	0	0	0	0	0
	1086	0	0	0	0	0	0	0	0	0	0	0	0	0	0	0	0	0	0	0	0
	1087	0	0	0	0	0	0	0	0	0	0	0	0	0	0	0	0	0	0	0	0
	1088	0	0	0	0	0	0	0	0	0	0	0	0	0	0	0	0	0	0	0	0
	1089	0	0	0	0	0	0	0	0	0	0	0	0	0	0	0	0	0	0	0	0
	1090	0	0	0	0	0	0	0	0	0	0	0	0	0	0	0	0	0	0	0	0
	1091	0	0	0	0	0	0	0	0	0	0	0	0	0	0	0	0	0	0	0	0
	1092	0	0	0	0	0	0	0	0	0	0	0	0	0	0	0	0	0	0	0	0
	1093	0	0	0	0	0	0	0	0	0	0	0	0	0	0	0	0	0	0	0	0
	1094	0	0	0	0	0	0	0	0	0	0	0	0	0	0	0	0	0	0	0	0
	1095	0	0	0	0	0	0	0	0	0	0	0	0	0	0	0	0	0	0	0	0
	1096	0	0	0	0	0	0	0	0	0	0	0	0	0	0	0	0	0	0	0	0
	1097	0	0	0	0	0	0	0	0	0	0	0	0	0	0	0	0	0	0	0	0
	1098	0	0	0	0	0	0	0	0	0	0	0	0	0	0	0	0	0	0	0	0
	1099	0	0	0	0	0	0	0	0	0	0	0	0	0	0	0	0	0	0	0	0
	1100	0	0	0	0	0	0	0	0	0	0	0	0	0	0	0	0	0	0	0	0
	1101	0	0	0	0	0	0	0	0	0	0	0	0	0	0	0	0	0	0	0	0
	1102	0	0	0	0	0	0	0	0	0	0	0	0	0	0	0	0	0	0	0	0
	1103	0	0	0	0	0	0	0	0	0	0	0	0	0	0	0	0	0	0	0	0
	1104	0	0	0	0	0	0	0	0	0	0	0	0	0	0	0	0	0	0	0	0
	1105	0	0	0	0	0	0	0	0	0	0	0	0	0	0	0	0	0	0	0	0
	1106	0	0	0	0	0	0	0	0	0	0	0	0	0	0	0	0	0	0	0	0
	1107	0	0	0	0	0	0	0	0	0	0	0	0	0	0	0	0	0	0	0	0
	1108	0	0	0	0	0	0	0	0	0	0	0	0	0	0	0	0	0	0	0	0
	1109	0	0	0	0	0	0	0	0	0	0	0	0	0	0	0	0	0	0	0	0
	1110	0	0	0	0	0	0	0	0	0	0	0	0	0	0	0	0	0	0	0	0
	1111	0	0	0	0	0	0	0	0	0	0	0	0	0	0	0	0	0	0	0	0
	1112	0	0	0	0	0	0	0	0	0	0	0	0	0	0	0	0	0	0	0	0
	1113	0	0	0	0	0	0	0	0	0	0	0	0	0	0	0	0	0	0	0	0
	1114	0	0	0	0	0	0	0	0	0	0	0	0	0	0	0	0	0	0	0	0
	1115	0	0	0	0	0	0	0	0	0	0	0	0	0	0	0	0	0	0	0	0
	1116	0	0	0	0	0	0	0	0	0	0	0	0	0	0	0	0	0	0	0	0
	1117	0	0	0	0	0	0	0	0	0	0	0	0	0	0	0	0	0	0	0	0
	1118	0	0	0	0	0	0	0	0	0	0	0	0	0	0	0	0	0	0	0	0
	1119	0	0	0	0	0	0	0	0	0	0	0	0	0	0	0	0	0	0	0	0
	1120	0	0	0	0	0	0	0	0	0	0	0	0	0	0	0	0	0	0	0	0
	1121	0	0	0	0	0	0	0	0	0	0	0	0	0	0	0	0	0	0	0	0
	1122	0	0	0	0	0	0	0	0	0	0	0	0	0	0	0	0	0	0	0	0
	1123	0	0	0	0	0	0	0	0	0	0	0	0	0	0	0	0	0	0	0	0
	1124	0	0	0	0	0	0	0	0	0	0	0	0	0	0	0	0	0	0	0	0
	1125	0	0	0	0	0	0	0	0	0	0	0	0	0	0	0	0	0	0	0	0
	1126	0	0	0	0	0	0	0	0	0	0	0	0	0	0	0	0	0	0	0	0
	1127	0	0	0	0	0	0	0	0	0	0	0	0	0	0	0	0	0	0	0	0
	1128	0	0	0	0	0	0	0	0	0	0	0	0	0	0	0	0	0	0	0	0
	1129	0	0	0	0	0	0	0	0	0	0	0	0	0	0	0	0	0	0	0	0
	1130	0	0	0	0	0	0	0	0	0	0	0	0	0	0	0	0	0	0	0	0
	1131	0	0	0	0	0	0	0	0	0	0	0	0	0	0	0	0	0	0	0	0
	1132	0	0	0	0	0	0	0	0	0	0	0	0	0	0	0	0	0	0	0	0
	1133	0	0	0	0	0	0	0	0	0	0	0	0	0	0	0	0	0	0	0	0
	1134	0	0	0	0	0	0	0	0	0	0	0	0	0	0	0	0	0	0	0	0
	1135	0	0	0	0	0	0	0	0	0	0	0	0	0	0	0	0	0	0	0	0
	1136	0	0	0	0	0	0	0	0	0	0	0	0	0	0	0	0	0	0	0	0
	1137	0	0	0	0	0	0	0	0	0	0	0	0	0	0	0	0	0	0	0	0
	1138	0	0	0	0	0	0	0	0	0	0	0	0	0	0	0	0	0	0	0	0
	1139	0	0	0	0	0	0	0	0	0	0	0	0	0	0	0	0	0	0	0	0
	1140	0	0	0	0	0	0	0	0	0	0	0	0	0	0	0	0	0	0	0	0
	1141	0	0	0	0	0	0	0	0	0	0	0	0	0	0	0	0	0	0	0	0
	1142	0	0	0	0	0	0	0	0	0	0	0	0	0	0	0	0	0	0	0	0
	1143	0	0	0	0	0	0	0	0	0	0	0	0	0	0	0	0	0	0	0	0
	1144	0	0	0	0	0	0	0	0	0	0	0	0	0	0	0	0	0	0	0	0
	1145	0	0	0	0	0	0	0	0	0	0	0	0	0	0	0	0	0	0	0	0
	1146	0	0	0	0	0	0	0	0	0	0	0	0	0	0	0	0	0	0	0	0
	1147	0	0	0	0	0	0	0	0	0	0	0	0	0	0	0	0	0	0	0	0
	1148	0	0	0	0	0	0	0	0	0	0	0	0	0	0	0	0	0	0	0	0
	1149	0	0	0	0	0	0	0	0	0	0	0	0	0	0	0	0	0	0	0	0
	1150	0	0	0	0	0	0	0	0	0	0	0	0	0	0	0	0	0	0	0	0
	1151	0	0	0	0	0	0	0	0	0	0	0	0	0	0	0	0	0	0	0	0
	1152	0	0	0	0	0	0	0	0	0	0	0	0	0	0	0	0	0	0	0	0
	1153	0	0	0	0	0	0	0	0	0	0	0	0	0	0	0	0	0	0	0	0
	1154	0	0	0	0	0	0	0	0	0	0	0	0	0	0	0	0	0	0	0	0
	1155	0	0	0	0	0	0	0	0	0	0	0	0	0	0	0	0	0	0	0	0
	1156	0	0	0	0	0	0	0	0	0	0	0	0	0	0	0	0	0	0	0	0
	1157	0	0	0	0	0	0	0	0	0	0	0	0	0	0	0	0	0	0	0	0
	1158	0	0	0	0	0	0	0	0	0	0	0	0	0	0	0	0	0	0	0	0
	1159	0	0	0	0	0	0	0	0	0	0	0	0	0	0	0	0	0	0	0	0
	1160	0	0	0	0	0	0	0	0	0	0	0	0	0	0	0	0	0	0	0	0
	1161	0	0	0	0	0	0	0	0	0	0	0	0	0	0	0	0	0	0	0	0
	1162	0	0	0	0	0	0	0	0	0	0	0	0	0	0	0	0	0	0	0	0
	1163	0	0	0	0	0	0	0	0	0	0	0	0	0	0	0	0	0	0	0	0
	1164	0	0	0	0	0	0	0	0	0	0	0	0	0	0	0	0	0	0	0	0
	1165	0	0	0	0	0	0	0	0	0	0	0	0	0	0	0	0	0	0	0	0
	1166	0	0	0	0	0	0	0	0	0	0	0	0	0	0	0	0	0	0	0	0
	1167	0	0	0	0	0	0	0	0	0	0	0	0	0	0	0	0	0	0	0	0
	1168	0	0	0	0	0	0	0	0	0	0	0	0	0	0	0	0	0	0	0	0
	1169	0	0	0	0	0	0	0	0	0	0	0	0	0	0	0	0	0	0	0	0
	1170	0	0	0	0	0	0	0	0	0	0	0	0	0	0	0	0	0	0	0	0
	1171	0	0	0	0	0	0	0	0	0	0	0	0	0	0	0	0	0	0	0	0
	1172	0	0	0	0	0	0	0	0	0	0	0	0	0	0	0	0	0	0	0	0
	1173	0	0	0	0	0	0	0	0	0	0	0	0	0	0	0	0	0	0	0	0
	1174	0	0	0	0	0	0	0	0	0	0	0	0	0	0	0	0	0	0	0	0
	1175	0	0	0	0	0	0	0	0	0	0	0	0	0	0	0	0	0	0	0	0
	1176	0	0	0	0	0	0	0	0	0	0	0	0	0	0	0	0	0	0	0	0
	1177	0	0	0	0	0	0	0	0	0	0	0	0	0	0	0	0	0	0	0	0
	1178	0	0	0	0	0	0	0	0	0	0	0	0	0	0	0	0	0	0	0	0
	1179	0	0	0	0	0	0	0	0	0	0	0	0	0	0	0	0	0	0	0	0
	1180	0	0	0	0	0	0	0	0	0	0	0	0	0	0	0	0	0	0	0	0
	1181	0	0	0	0	0	0	0	0	0	0	0	0	0	0	0	0	0	0	0	0
	1182	0	0	0	0	0	0	0	0	0	0	0	0	0	0	0	0	0	0	0	0
	1183	0	0	0	0	0	0	0	0	0	0	0	0	0	0	0	0	0	0	0	0
	1184	0	0	0	0	0	0	0	0	0	0	0	0	0	0	0	0	0	0	0	0
	1185	0	0	0	0	0	0	0	0	0	0	0	0	0	0	0	0	0	0	0	0
	1186	0	0	0	0	0	0	0	0	0	0	0	0	0	0	0	0	0	0	0	0
	1187	0	0	0	0	0	0	0	0	0	0	0	0	0	0	0	0	0	0	0	0
	1188	0	0	0	0	0	0	0	0	0	0	0	0	0	0	0	0	0	0	0	0
	1189	0	0	0	0	0	0	0	0	0	0	0	0	0	0	0	0	0	0	0	0
	1190	0	0	0	0	0	0	0	0	0	0	0	0	0	0	0	0	0	0	0	0
	1191	0	0	0	0	0	0	0	0	0	0	0	0	0	0	0	0	0	0	0	0
	1192	0	0	0	0	0	0	0	0	0	0	0	0	0	0	0	0	0	0	0	0
	1193	0	0	0	0	0	0	0	0	0	0	0	0	0	0	0	0	0	0	0	0
	1194	0	0	0	0	0	0	0	0	0	0	0	0	0	0	0	0	0	0	0	0
	1195	0	0	0	0	0	0	0	0	0	0	0	0	0	0	0	0	0	0	0	0
	1196	0	0	0	0	0	0	0	0	0	0	0	0	0	0	0	0	0	0	0	0
	1197	0	0	0	0	0	0	0	0	0	0	0	0	0	0	0	0	0	0	0	0
	1198	0	0	0	0	0	0	0	0	0	0	0	0	0	0	0	0	0	0	0	0
	1199	0	0	0	0	0	0	0	0	0	0	0	0	0	0	0	0	0	0	0	0
	1200	0	0	0	0	0	0	0	0	0	0	0	0	0	0	0	0	0	0	0	0
	1201	0	0	0	0	0	0	0	0	0	0	0	0	0	0	0	0	0	0	0	0
	1202	0	0	0	0	0	0	0	0	0	0	0	0	0	0	0	0	0	0	0	0
	1203	0	0	0	0	0	0	0	0	0	0	0	0	0	0	0	0	0	0	0	0
	1204	0	0	0	0	0	0	0	0	0	0	0	0	0	0	0	0	0	0	0	0
	1205	0	0	0	0	0	0	0	0	0	0	0	0	0	0	0	0	0	0	0	0
	1206	0	0	0	0	0	0	0	0	0	0	0	0	0	0	0	0	0	0	0	0
	1207	0	0	0	0	0	0	0	0	0	0	0	0	0	0	0	0	0	0	0	0
	1208	0	0	0	0	0	0	0	0	0	0	0	0	0	0	0	0	0	0	0	0
	1209	0	0	0	0	0	0	0	0	0	0	0	0	0	0	0	0	0	0	0	0
	1210	0	0	0	0	0	0	0	0	0	0	0	0	0	0	0	0	0	0	0	0
	1211	0	0	0	0	0	0	0	0	0	0	0	0	0	0	0	0	0	0	0	0
	1212	0	0	0	0	0	0	0	0	0	0	0	0	0	0	0	0	0	0	0	0
	1213	0	0	0	0	0	0	0	0	0	0	0	0	0	0	0	0	0	0	0	0										0	0	0	0	0	0	0	0	0	0	0	0	0	0	0	0	0	0	0
	1214	0	0	0	0	0	0	0	0	0	0	0	0	0	0	0	0	0	0	0	0										0	0	0	0	0	0	0	0	0	0	0	0	0	0	0	0	0	0	0
	1215	0	0	0	0	0	0	0	0	0	0	0	0	0	0	0	0	0	0	0	0										0	0	0	0	0	0	0	0	0	0	0	0	0	0	0	0	0	0	0
	1216	0	0	0	0	0	0	0	0	0	0	0	0	0	0	0	0	0	0	0	0										0	0	0	0	0	0	0	0	0	0	0	0	0	0	0	0	0	0	0
	1217	0	0	0	0	0	0	0	0	0	0	0	0	0	0	0	0	0	0	0	0										0	0	0	0	0	0	0	0	0	0	0	0	0	0	0	0	0	0	0
																															0	0	0	0	0	0	0	0	0	0	0	0	0	0	0	0	0	0	0
SUM	609	3397	3406	3381	3388	3421	3406	3381	3388	3381	3421	3421	3406	0	0	0	0	0	0	0	0									571915	45380	45398	45332	45344	45500	45434	45268	45308	45236	45620	45644	45488	0	0	0	0	0	0	0
CN X SUM OF ELEM.		44161	44278	43953	44044	44473	44278	43953	44044	43953	44473	44473	44278	0	0	0	0	0	0	0	0
		7	8	9	10	11	12	13	14	15	16	17	18	19	20	21	22	23	24	25	26
	SC	0.973138	0.975329	0.96958	0.97133	0.977429	0.974556	0.970951	0.972102	0.971638	0.974858	0.974345	0.9734	#DIV/0!	#DIV/0!	#DIV/0!	#DIV/0!	#DIV/0!	#DIV/0!	#DIV/0!	#DIV/0!
[truncated: 3 more columns]

## Sheet: M02 (Aligned & unaligned seq.)
	OPTINALYSIS: SEQUENCE ANALYSIS THROUGH A LOOKING-GLASS
	CN = Central node; Kc = Kabirian coefficient of similarity; %Sim. = Percentage similarity; %Dsim. = Percentage dissimilarity																NUM. = Numeration; DEN. = Denumeration
				For Kc >1		For Kc <1
	RESULTS	CN	Kc	%Sim.	%Dsim.	%Sim.	%Dsim.										NUM	DEN		NUM	DEN
	M1	13	1.05278	0.81775	0.18225	1.22287	-0.222867										0.947224	1.15833		-1.15833	-0.947224
	M2	13	1.0555	0.809696	0.190304	1.23503	-0.235031										0.944503	1.16649		-1.16649	-0.944503
	M3	13	1.0484	0.83095	0.16905	1.20344	-0.203441										0.951601	1.1452		-1.1452	-0.951601
	M4	13	1.05058	0.824341	0.175659	1.21309	-0.21309										0.949422	1.15173		-1.15173	-0.949422
	M5	13	1.05791	0.802636	0.197364	1.2459	-0.245895										0.942086	1.17374		-1.17374	-0.942086
	M6	13	1.05444	0.812801	0.187199	1.23031	-0.230314										0.945556	1.16333		-1.16333	-0.945556
	M7	13	1.05027	0.825279	0.174721	1.21171	-0.211712										0.949733	1.1508		-1.1508	-0.949733
	M8	13	1.05163	0.821177	0.178823	1.21776	-0.217764										0.94837	1.15489		-1.15489	-0.94837
	M9	13	1.0512	0.822456	0.177544	1.21587	-0.21587										0.948796	1.15361		-1.15361	-0.948796
	M10	13	1.05441	0.812893	0.187107	1.23017	-0.230175										0.945587	1.16324		-1.16324	-0.945587
	M11	13	1.05372	0.814958	0.185042	1.22706	-0.227057										0.946285	1.16115		-1.16115	-0.946285
	M12	13	1.05287	0.817478	0.182522	1.22327	-0.223274										0.947132	1.1586		-1.1586	-0.947132
	X	13	#DIV/0!	#DIV/0!	#DIV/0!	#DIV/0!	#DIV/0!										#DIV/0!	#DIV/0!		#DIV/0!	#DIV/0!
	X	13	#DIV/0!	#DIV/0!	#DIV/0!	#DIV/0!	#DIV/0!										#DIV/0!	#DIV/0!		#DIV/0!	#DIV/0!
	X	13	#DIV/0!	#DIV/0!	#DIV/0!	#DIV/0!	#DIV/0!										#DIV/0!	#DIV/0!		#DIV/0!	#DIV/0!
	X	13	#DIV/0!	#DIV/0!	#DIV/0!	#DIV/0!	#DIV/0!										#DIV/0!	#DIV/0!		#DIV/0!	#DIV/0!
	X	13	#DIV/0!	#DIV/0!	#DIV/0!	#DIV/0!	#DIV/0!										#DIV/0!	#DIV/0!		#DIV/0!	#DIV/0!
	X	13	#DIV/0!	#DIV/0!	#DIV/0!	#DIV/0!	#DIV/0!										#DIV/0!	#DIV/0!		#DIV/0!	#DIV/0!
	X	13	#DIV/0!	#DIV/0!	#DIV/0!	#DIV/0!	#DIV/0!										#DIV/0!	#DIV/0!		#DIV/0!	#DIV/0!
	X	13	#DIV/0!	#DIV/0!	#DIV/0!	#DIV/0!	#DIV/0!										#DIV/0!	#DIV/0!		#DIV/0!	#DIV/0!
	SEQUENCES	INPUT SEQUENCE																												SEQUENCES	COMPUTATION AND CALCULATIONS
	QUANTITATIVE SCALE	M1	M2	M3	M4	M5	M6	M7	M8	M9	M10	M11	M12	X	X	X	X	X	X	X	X									QUANTITATIVE SCALE	M1	M2	M3	M4	M5	M6	M7	M8	M9	M10	M11	M12	X	X	X	X	X	X	X
	1	151	151	151	151	151	151	151	151	151	151	151	151	0	0	0	0	0	0	0	0									1	151	151	151	151	151	151	151	151	151	151	151	151	0	0	0	0	0	0	0
	2	126	135	126	126	126	126	126	126	126	126	126	126	0	0	0	0	0	0	0	0									2	252	270	252	252	252	252	252	252	252	252	252	252	0	0	0	0	0	0	0
	3	151	151	135	151	151	151	151	151	151	151	151	151	0	0	0	0	0	0	0	0									3	453	453	405	453	453	453	453	453	453	453	453	453	0	0	0	0	0	0	0
	4	135	135	135	126	135	135	135	135	135	135	135	135	0	0	0	0	0	0	0	0									4	540	540	540	504	540	540	540	540	540	540	540	540	0	0	0	0	0	0	0
	5	111	111	111	111	135	111	111	111	111	111	111	111	0	0	0	0	0	0	0	0									5	555	555	555	555	675	555	555	555	555	555	555	555	0	0	0	0	0	0	0
	6	126	126	126	126	126	135	126	126	126	126	126	126	0	0	0	0	0	0	0	0									6	756	756	756	756	756	810	756	756	756	756	756	756	0	0	0	0	0	0	0
	7	151	151	151	151	151	151	135	151	151	151	151	151	0	0	0	0	0	0	0	0									7	1057	1057	1057	1057	1057	1057	945	1057	1057	1057	1057	1057	0	0	0	0	0	0	0
	8	135	135	135	135	135	135	135	126	135	135	135	135	0	0	0	0	0	0	0	0									8	1080	1080	1080	1080	1080	1080	1080	1008	1080	1080	1080	1080	0	0	0	0	0	0	0
	9	151	151	151	151	151	151	151	151	135	151	151	151	0	0	0	0	0	0	0	0									9	1359	1359	1359	1359	1359	1359	1359	1359	1215	1359	1359	1359	0	0	0	0	0	0	0
	10	111	111	111	111	111	111	111	111	111	135	111	111	0	0	0	0	0	0	0	0									10	1110	1110	1110	1110	1110	1110	1110	1110	1110	1350	1110	1110	0	0	0	0	0	0	0
	11	111	111	111	111	111	111	111	111	111	111	135	111	0	0	0	0	0	0	0	0									11	1221	1221	1221	1221	1221	1221	1221	1221	1221	1221	1485	1221	0	0	0	0	0	0	0
	12	126	126	126	126	126	126	126	126	126	126	126	135	0	0	0	0	0	0	0	0									12	1512	1512	1512	1512	1512	1512	1512	1512	1512	1512	1512	1620	0	0	0	0	0	0	0
	13	0	0	0	0	0	0	0	0	0	0	0	0	0	0	0	0	0	0	0	0									13	0	0	0	0	0	0	0	0	0	0	0	0	0	0	0	0	0	0	0
	14	111	111	111	111	111	111	111	111	111	111	111	111	0	0	0	0	0	0	0	0									14	1554	1554	1554	1554	1554	1554	1554	1554	1554	1554	1554	1554	0	0	0	0	0	0	0
	15	111	111	111	111	111	111	111	111	111	111	111	111	0	0	0	0	0	0	0	0									15	1665	1665	1665	1665	1665	1665	1665	1665	1665	1665	1665	1665	0	0	0	0	0	0	0
	16	111	111	111	111	111	111	111	111	111	111	111	111	0	0	0	0	0	0	0	0									16	1776	1776	1776	1776	1776	1776	1776	1776	1776	1776	1776	1776	0	0	0	0	0	0	0
	17	111	111	111	111	111	111	111	111	111	111	111	111	0	0	0	0	0	0	0	0									17	1887	1887	1887	1887	1887	1887	1887	1887	1887	1887	1887	1887	0	0	0	0	0	0	0
	18	111	111	111	111	111	111	111	111	111	111	111	111	0	0	0	0	0	0	0	0									18	1998	1998	1998	1998	1998	1998	1998	1998	1998	1998	1998	1998	0	0	0	0	0	0	0
	19	111	111	111	111	111	111	111	111	111	111	111	111	0	0	0	0	0	0	0	0									19	2109	2109	2109	2109	2109	2109	2109	2109	2109	2109	2109	2109	0	0	0	0	0	0	0
	20	111	111	111	111	111	111	111	111	111	111	111	111	0	0	0	0	0	0	0	0									20	2220	2220	2220	2220	2220	2220	2220	2220	2220	2220	2220	2220	0	0	0	0	0	0	0
	21	111	111	111	111	111	111	111	111	111	111	111	111	0	0	0	0	0	0	0	0									21	2331	2331	2331	2331	2331	2331	2331	2331	2331	2331	2331	2331	0	0	0	0	0	0	0
	22	111	111	111	111	111	111	111	111	111	111	111	111	0	0	0	0	0	0	0	0									22	2442	2442	2442	2442	2442	2442	2442	2442	2442	2442	2442	2442	0	0	0	0	0	0	0
	23	111	111	111	111	111	111	111	111	111	111	111	111	0	0	0	0	0	0	0	0									23	2553	2553	2553	2553	2553	2553	2553	2553	2553	2553	2553	2553	0	0	0	0	0	0	0
	24	111	111	111	111	111	111	111	111	111	111	111	111	0	0	0	0	0	0	0	0									24	2664	2664	2664	2664	2664	2664	2664	2664	2664	2664	2664	2664	0	0	0	0	0	0	0
	25	111	111	111	111	111	111	111	111	111	111	111	111	0	0	0	0	0	0	0	0									25	2775	2775	2775	2775	2775	2775	2775	2775	2775	2775	2775	2775	0	0	0	0	0	0	0
	26	0	0	0	0	0	0	0	0	0	0	0	0	0	0	0	0	0	0	0	0									26	0	0	0	0	0	0	0	0	0	0	0	0	0	0	0	0	0	0	0
	27	0	0	0	0	0	0	0	0	0	0	0	0	0	0	0	0	0	0	0	0									27	0	0	0	0	0	0	0	0	0	0	0	0	0	0	0	0	0	0	0
	28	0	0	0	0	0	0	0	0	0	0	0	0	0	0	0	0	0	0	0	0									28	0	0	0	0	0	0	0	0	0	0	0	0	0	0	0	0	0	0	0
	29	0	0	0	0	0	0	0	0	0	0	0	0	0	0	0	0	0	0	0	0									29	0	0	0	0	0	0	0	0	0	0	0	0	0	0	0	0	0	0	0
	30	0	0	0	0	0	0	0	0	0	0	0	0	0	0	0	0	0	0	0	0									30	0	0	0	0	0	0	0	0	0	0	0	0	0	0	0	0	0	0	0
	31	0	0	0	0	0	0	0	0	0	0	0	0	0	0	0	0	0	0	0	0									31	0	0	0	0	0	0	0	0	0	0	0	0	0	0	0	0	0	0	0
	32	0	0	0	0	0	0	0	0	0	0	0	0	0	0	0	0	0	0	0	0									32	0	0	0	0	0	0	0	0	0	0	0	0	0	0	0	0	0	0	0
	33	0	0	0	0	0	0	0	0	0	0	0	0	0	0	0	0	0	0	0	0									33	0	0	0	0	0	0	0	0	0	0	0	0	0	0	0	0	0	0	0
	34	0	0	0	0	0	0	0	0	0	0	0	0	0	0	0	0	0	0	0	0									34	0	0	0	0	0	0	0	0	0	0	0	0	0	0	0	0	0	0	0
	35	0	0	0	0	0	0	0	0	0	0	0	0	0	0	0	0	0	0	0	0									35	0	0	0	0	0	0	0	0	0	0	0	0	0	0	0	0	0	0	0
	36	0	0	0	0	0	0	0	0	0	0	0	0	0	0	0	0	0	0	0	0									36	0	0	0	0	0	0	0	0	0	0	0	0	0	0	0	0	0	0	0
	37	0	0	0	0	0	0	0	0	0	0	0	0	0	0	0	0	0	0	0	0									37	0	0	0	0	0	0	0	0	0	0	0	0	0	0	0	0	0	0	0
	38	0	0	0	0	0	0	0	0	0	0	0	0	0	0	0	0	0	0	0	0									38	0	0	0	0	0	0	0	0	0	0	0	0	0	0	0	0	0	0	0
	39	0	0	0	0	0	0	0	0	0	0	0	0	0	0	0	0	0	0	0	0									39	0	0	0	0	0	0	0	0	0	0	0	0	0	0	0	0	0	0	0
	40	0	0	0	0	0	0	0	0	0	0	0	0	0	0	0	0	0	0	0	0									40	0	0	0	0	0	0	0	0	0	0	0	0	0	0	0	0	0	0	0
	41	0	0	0	0	0	0	0	0	0	0	0	0	0	0	0	0	0	0	0	0									41	0	0	0	0	0	0	0	0	0	0	0	0	0	0	0	0	0	0	0
	42	0	0	0	0	0	0	0	0	0	0	0	0	0	0	0	0	0	0	0	0									42	0	0	0	0	0	0	0	0	0	0	0	0	0	0	0	0	0	0	0
	43	0	0	0	0	0	0	0	0	0	0	0	0	0	0	0	0	0	0	0	0									43	0	0	0	0	0	0	0	0	0	0	0	0	0	0	0	0	0	0	0
	44	0	0	0	0	0	0	0	0	0	0	0	0	0	0	0	0	0	0	0	0									44	0	0	0	0	0	0	0	0	0	0	0	0	0	0	0	0	0	0	0
	45	0	0	0	0	0	0	0	0	0	0	0	0	0	0	0	0	0	0	0	0									45	0	0	0	0	0	0	0	0	0	0	0	0	0	0	0	0	0	0	0
	46	0	0	0	0	0	0	0	0	0	0	0	0	0	0	0	0	0	0	0	0									46	0	0	0	0	0	0	0	0	0	0	0	0	0	0	0	0	0	0	0
	47	0	0	0	0	0	0	0	0	0	0	0	0	0	0	0	0	0	0	0	0									47	0	0	0	0	0	0	0	0	0	0	0	0	0	0	0	0	0	0	0
	48	0	0	0	0	0	0	0	0	0	0	0	0	0	0	0	0	0	0	0	0									48	0	0	0	0	0	0	0	0	0	0	0	0	0	0	0	0	0	0	0
	49	0	0	0	0	0	0	0	0	0	0	0	0	0	0	0	0	0	0	0	0									49	0	0	0	0	0	0	0	0	0	0	0	0	0	0	0	0	0	0	0
	50	0	0	0	0	0	0	0	0	0	0	0	0	0	0	0	0	0	0	0	0									50	0	0	0	0	0	0	0	0	0	0	0	0	0	0	0	0	0	0	0
	51	0	0	0	0	0	0	0	0	0	0	0	0	0	0	0	0	0	0	0	0									51	0	0	0	0	0	0	0	0	0	0	0	0	0	0	0	0	0	0	0
	52	0	0	0	0	0	0	0	0	0	0	0	0	0	0	0	0	0	0	0	0									52	0	0	0	0	0	0	0	0	0	0	0	0	0	0	0	0	0	0	0
	53	0	0	0	0	0	0	0	0	0	0	0	0	0	0	0	0	0	0	0	0									53	0	0	0	0	0	0	0	0	0	0	0	0	0	0	0	0	0	0	0
	54	0	0	0	0	0	0	0	0	0	0	0	0	0	0	0	0	0	0	0	0									54	0	0	0	0	0	0	0	0	0	0	0	0	0	0	0	0	0	0	0
	55	0	0	0	0	0	0	0	0	0	0	0	0	0	0	0	0	0	0	0	0									55	0	0	0	0	0	0	0	0	0	0	0	0	0	0	0	0	0	0	0
	56	0	0	0	0	0	0	0	0	0	0	0	0	0	0	0	0	0	0	0	0									56	0	0	0	0	0	0	0	0	0	0	0	0	0	0	0	0	0	0	0
	57	0	0	0	0	0	0	0	0	0	0	0	0	0	0	0	0	0	0	0	0									57	0	0	0	0	0	0	0	0	0	0	0	0	0	0	0	0	0	0	0
	58	0	0	0	0	0	0	0	0	0	0	0	0	0	0	0	0	0	0	0	0									58	0	0	0	0	0	0	0	0	0	0	0	0	0	0	0	0	0	0	0
	59	0	0	0	0	0	0	0	0	0	0	0	0	0	0	0	0	0	0	0	0									59	0	0	0	0	0	0	0	0	0	0	0	0	0	0	0	0	0	0	0
	60	0	0	0	0	0	0	0	0	0	0	0	0	0	0	0	0	0	0	0	0									60	0	0	0	0	0	0	0	0	0	0	0	0	0	0	0	0	0	0	0
	61	0	0	0	0	0	0	0	0	0	0	0	0	0	0	0	0	0	0	0	0									61	0	0	0	0	0	0	0	0	0	0	0	0	0	0	0	0	0	0	0
	62	0	0	0	0	0	0	0	0	0	0	0	0	0	0	0	0	0	0	0	0									62	0	0	0	0	0	0	0	0	0	0	0	0	0	0	0	0	0	0	0
	63	0	0	0	0	0	0	0	0	0	0	0	0	0	0	0	0	0	0	0	0									63	0	0	0	0	0	0	0	0	0	0	0	0	0	0	0	0	0	0	0
	64	0	0	0	0	0	0	0	0	0	0	0	0	0	0	0	0	0	0	0	0									64	0	0	0	0	0	0	0	0	0	0	0	0	0	0	0	0	0	0	0
	65	0	0	0	0	0	0	0	0	0	0	0	0	0	0	0	0	0	0	0	0									65	0	0	0	0	0	0	0	0	0	0	0	0	0	0	0	0	0	0	0
	66	0	0	0	0	0	0	0	0	0	0	0	0	0	0	0	0	0	0	0	0									66	0	0	0	0	0	0	0	0	0	0	0	0	0	0	0	0	0	0	0
	67	0	0	0	0	0	0	0	0	0	0	0	0	0	0	0	0	0	0	0	0									67	0	0	0	0	0	0	0	0	0	0	0	0	0	0	0	0	0	0	0
	68	0	0	0	0	0	0	0	0	0	0	0	0	0	0	0	0	0	0	0	0									68	0	0	0	0	0	0	0	0	0	0	0	0	0	0	0	0	0	0	0
	69	0	0	0	0	0	0	0	0	0	0	0	0	0	0	0	0	0	0	0	0									69	0	0	0	0	0	0	0	0	0	0	0	0	0	0	0	0	0	0	0
	70	0	0	0	0	0	0	0	0	0	0	0	0	0	0	0	0	0	0	0	0									70	0	0	0	0	0	0	0	0	0	0	0	0	0	0	0	0	0	0	0
	71	0	0	0	0	0	0	0	0	0	0	0	0	0	0	0	0	0	0	0	0									71	0	0	0	0	0	0	0	0	0	0	0	0	0	0	0	0	0	0	0
	72	0	0	0	0	0	0	0	0	0	0	0	0	0	0	0	0	0	0	0	0									72	0	0	0	0	0	0	0	0	0	0	0	0	0	0	0	0	0	0	0
	73	0	0	0	0	0	0	0	0	0	0	0	0	0	0	0	0	0	0	0	0									73	0	0	0	0	0	0	0	0	0	0	0	0	0	0	0	0	0	0	0
	74	0	0	0	0	0	0	0	0	0	0	0	0	0	0	0	0	0	0	0	0									74	0	0	0	0	0	0	0	0	0	0	0	0	0	0	0	0	0	0	0
	75	0	0	0	0	0	0	0	0	0	0	0	0	0	0	0	0	0	0	0	0									75	0	0	0	0	0	0	0	0	0	0	0	0	0	0	0	0	0	0	0
	76	0	0	0	0	0	0	0	0	0	0	0	0	0	0	0	0	0	0	0	0									76	0	0	0	0	0	0	0	0	0	0	0	0	0	0	0	0	0	0	0
	77	0	0	0	0	0	0	0	0	0	0	0	0	0	0	0	0	0	0	0	0									77	0	0	0	0	0	0	0	0	0	0	0	0	0	0	0	0	0	0	0
	78	0	0	0	0	0	0	0	0	0	0	0	0	0	0	0	0	0	0	0	0									78	0	0	0	0	0	0	0	0	0	0	0	0	0	0	0	0	0	0	0
	79	0	0	0	0	0	0	0	0	0	0	0	0	0	0	0	0	0	0	0	0									79	0	0	0	0	0	0	0	0	0	0	0	0	0	0	0	0	0	0	0
	80	0	0	0	0	0	0	0	0	0	0	0	0	0	0	0	0	0	0	0	0									80	0	0	0	0	0	0	0	0	0	0	0	0	0	0	0	0	0	0	0
	81	0	0	0	0	0	0	0	0	0	0	0	0	0	0	0	0	0	0	0	0									81	0	0	0	0	0	0	0	0	0	0	0	0	0	0	0	0	0	0	0
	82	0	0	0	0	0	0	0	0	0	0	0	0	0	0	0	0	0	0	0	0									82	0	0	0	0	0	0	0	0	0	0	0	0	0	0	0	0	0	0	0
	83	0	0	0	0	0	0	0	0	0	0	0	0	0	0	0	0	0	0	0	0									83	0	0	0	0	0	0	0	0	0	0	0	0	0	0	0	0	0	0	0
	84	0	0	0	0	0	0	0	0	0	0	0	0	0	0	0	0	0	0	0	0									84	0	0	0	0	0	0	0	0	0	0	0	0	0	0	0	0	0	0	0
	85	0	0	0	0	0	0	0	0	0	0	0	0	0	0	0	0	0	0	0	0									85	0	0	0	0	0	0	0	0	0	0	0	0	0	0	0	0	0	0	0
	86	0	0	0	0	0	0	0	0	0	0	0	0	0	0	0	0	0	0	0	0									86	0	0	0	0	0	0	0	0	0	0	0	0	0	0	0	0	0	0	0
	87	0	0	0	0	0	0	0	0	0	0	0	0	0	0	0	0	0	0	0	0									87	0	0	0	0	0	0	0	0	0	0	0	0	0	0	0	0	0	0	0
	88	0	0	0	0	0	0	0	0	0	0	0	0	0	0	0	0	0	0	0	0									88	0	0	0	0	0	0	0	0	0	0	0	0	0	0	0	0	0	0	0
	89	0	0	0	0	0	0	0	0	0	0	0	0	0	0	0	0	0	0	0	0									89	0	0	0	0	0	0	0	0	0	0	0	0	0	0	0	0	0	0	0
	90	0	0	0	0	0	0	0	0	0	0	0	0	0	0	0	0	0	0	0	0									90	0	0	0	0	0	0	0	0	0	0	0	0	0	0	0	0	0	0	0
	91	0	0	0	0	0	0	0	0	0	0	0	0	0	0	0	0	0	0	0	0									91	0	0	0	0	0	0	0	0	0	0	0	0	0	0	0	0	0	0	0
	92	0	0	0	0	0	0	0	0	0	0	0	0	0	0	0	0	0	0	0	0									92	0	0	0	0	0	0	0	0	0	0	0	0	0	0	0	0	0	0	0
	93	0	0	0	0	0	0	0	0	0	0	0	0	0	0	0	0	0	0	0	0									93	0	0	0	0	0	0	0	0	0	0	0	0	0	0	0	0	0	0	0
	94	0	0	0	0	0	0	0	0	0	0	0	0	0	0	0	0	0	0	0	0									94	0	0	0	0	0	0	0	0	0	0	0	0	0	0	0	0	0	0	0
	95	0	0	0	0	0	0	0	0	0	0	0	0	0	0	0	0	0	0	0	0									95	0	0	0	0	0	0	0	0	0	0	0	0	0	0	0	0	0	0	0
	96	0	0	0	0	0	0	0	0	0	0	0	0	0	0	0	0	0	0	0	0									96	0	0	0	0	0	0	0	0	0	0	0	0	0	0	0	0	0	0	0
	97	0	0	0	0	0	0	0	0	0	0	0	0	0	0	0	0	0	0	0	0									97	0	0	0	0	0	0	0	0	0	0	0	0	0	0	0	0	0	0	0
	98	0	0	0	0	0	0	0	0	0	0	0	0	0	0	0	0	0	0	0	0									98	0	0	0	0	0	0	0	0	0	0	0	0	0	0	0	0	0	0	0
	99	0	0	0	0	0	0	0	0	0	0	0	0	0	0	0	0	0	0	0	0									99	0	0	0	0	0	0	0	0	0	0	0	0	0	0	0	0	0	0	0
	100	0	0	0	0	0	0	0	0	0	0	0	0	0	0	0	0	0	0	0	0									100	0	0	0	0	0	0	0	0	0	0	0	0	0	0	0	0	0	0	0
	101	0	0	0	0	0	0	0	0	0	0	0	0	0	0	0	0	0	0	0	0									101	0	0	0	0	0	0	0	0	0	0	0	0	0	0	0	0	0	0	0
	102	0	0	0	0	0	0	0	0	0	0	0	0	0	0	0	0	0	0	0	0									102	0	0	0	0	0	0	0	0	0	0	0	0	0	0	0	0	0	0	0
	103	0	0	0	0	0	0	0	0	0	0	0	0	0	0	0	0	0	0	0	0									103	0	0	0	0	0	0	0	0	0	0	0	0	0	0	0	0	0	0	0
	104	0	0	0	0	0	0	0	0	0	0	0	0	0	0	0	0	0	0	0	0									104	0	0	0	0	0	0	0	0	0	0	0	0	0	0	0	0	0	0	0
	105	0	0	0	0	0	0	0	0	0	0	0	0	0	0	0	0	0	0	0	0									105	0	0	0	0	0	0	0	0	0	0	0	0	0	0	0	0	0	0	0
	106	0	0	0	0	0	0	0	0	0	0	0	0	0	0	0	0	0	0	0	0									106	0	0	0	0	0	0	0	0	0	0	0	0	0	0	0	0	0	0	0
	107	0	0	0	0	0	0	0	0	0	0	0	0	0	0	0	0	0	0	0	0									107	0	0	0	0	0	0	0	0	0	0	0	0	0	0	0	0	0	0	0
	108	0	0	0	0	0	0	0	0	0	0	0	0	0	0	0	0	0	0	0	0									108	0	0	0	0	0	0	0	0	0	0	0	0	0	0	0	0	0	0	0
	109	0	0	0	0	0	0	0	0	0	0	0	0	0	0	0	0	0	0	0	0									109	0	0	0	0	0	0	0	0	0	0	0	0	0	0	0	0	0	0	0
	110	0	0	0	0	0	0	0	0	0	0	0	0	0	0	0	0	0	0	0	0									110	0	0	0	0	0	0	0	0	0	0	0	0	0	0	0	0	0	0	0
	111	0	0	0	0	0	0	0	0	0	0	0	0	0	0	0	0	0	0	0	0									111	0	0	0	0	0	0	0	0	0	0	0	0	0	0	0	0	0	0	0
	112	0	0	0	0	0	0	0	0	0	0	0	0	0	0	0	0	0	0	0	0									112	0	0	0	0	0	0	0	0	0	0	0	0	0	0	0	0	0	0	0
	113	0	0	0	0	0	0	0	0	0	0	0	0	0	0	0	0	0	0	0	0									113	0	0	0	0	0	0	0	0	0	0	0	0	0	0	0	0	0	0	0
	114	0	0	0	0	0	0	0	0	0	0	0	0	0	0	0	0	0	0	0	0									114	0	0	0	0	0	0	0	0	0	0	0	0	0	0	0	0	0	0	0
	115	0	0	0	0	0	0	0	0	0	0	0	0	0	0	0	0	0	0	0	0									115	0	0	0	0	0	0	0	0	0	0	0	0	0	0	0	0	0	0	0
	116	0	0	0	0	0	0	0	0	0	0	0	0	0	0	0	0	0	0	0	0									116	0	0	0	0	0	0	0	0	0	0	0	0	0	0	0	0	0	0	0
	117	0	0	0	0	0	0	0	0	0	0	0	0	0	0	0	0	0	0	0	0									117	0	0	0	0	0	0	0	0	0	0	0	0	0	0	0	0	0	0	0
	118	0	0	0	0	0	0	0	0	0	0	0	0	0	0	0	0	0	0	0	0									118	0	0	0	0	0	0	0	0	0	0	0	0	0	0	0	0	0	0	0
	119	0	0	0	0	0	0	0	0	0	0	0	0	0	0	0	0	0	0	0	0									119	0	0	0	0	0	0	0	0	0	0	0	0	0	0	0	0	0	0	0
	120	0	0	0	0	0	0	0	0	0	0	0	0	0	0	0	0	0	0	0	0									120	0	0	0	0	0	0	0	0	0	0	0	0	0	0	0	0	0	0	0
	121	0	0	0	0	0	0	0	0	0	0	0	0	0	0	0	0	0	0	0	0									121	0	0	0	0	0	0	0	0	0	0	0	0	0	0	0	0	0	0	0
	122	0	0	0	0	0	0	0	0	0	0	0	0	0	0	0	0	0	0	0	0									122	0	0	0	0	0	0	0	0	0	0	0	0	0	0	0	0	0	0	0
	123	0	0	0	0	0	0	0	0	0	0	0	0	0	0	0	0	0	0	0	0									123	0	0	0	0	0	0	0	0	0	0	0	0	0	0	0	0	0	0	0
	124	0	0	0	0	0	0	0	0	0	0	0	0	0	0	0	0	0	0	0	0									124	0	0	0	0	0	0	0	0	0	0	0	0	0	0	0	0	0	0	0
	125	0	0	0	0	0	0	0	0	0	0	0	0	0	0	0	0	0	0	0	0									125	0	0	0	0	0	0	0	0	0	0	0	0	0	0	0	0	0	0	0
	126	0	0	0	0	0	0	0	0	0	0	0	0	0	0	0	0	0	0	0	0									126	0	0	0	0	0	0	0	0	0	0	0	0	0	0	0	0	0	0	0
	127	0	0	0	0	0	0	0	0	0	0	0	0	0	0	0	0	0	0	0	0									127	0	0	0	0	0	0	0	0	0	0	0	0	0	0	0	0	0	0	0
	128	0	0	0	0	0	0	0	0	0	0	0	0	0	0	0	0	0	0	0	0									128	0	0	0	0	0	0	0	0	0	0	0	0	0	0	0	0	0	0	0
	129	0	0	0	0	0	0	0	0	0	0	0	0	0	0	0	0	0	0	0	0									129	0	0	0	0	0	0	0	0	0	0	0	0	0	0	0	0	0	0	0
	130	0	0	0	0	0	0	0	0	0	0	0	0	0	0	0	0	0	0	0	0									130	0	0	0	0	0	0	0	0	0	0	0	0	0	0	0	0	0	0	0
	131	0	0	0	0	0	0	0	0	0	0	0	0	0	0	0	0	0	0	0	0									131	0	0	0	0	0	0	0	0	0	0	0	0	0	0	0	0	0	0	0
	132	0	0	0	0	0	0	0	0	0	0	0	0	0	0	0	0	0	0	0	0									132	0	0	0	0	0	0	0	0	0	0	0	0	0	0	0	0	0	0	0
	133	0	0	0	0	0	0	0	0	0	0	0	0	0	0	0	0	0	0	0	0									133	0	0	0	0	0	0	0	0	0	0	0	0	0	0	0	0	0	0	0
	134	0	0	0	0	0	0	0	0	0	0	0	0	0	0	0	0	0	0	0	0									134	0	0	0	0	0	0	0	0	0	0	0	0	0	0	0	0	0	0	0
	135	0	0	0	0	0	0	0	0	0	0	0	0	0	0	0	0	0	0	0	0									135	0	0	0	0	0	0	0	0	0	0	0	0	0	0	0	0	0	0	0
	136	0	0	0	0	0	0	0	0	0	0	0	0	0	0	0	0	0	0	0	0									136	0	0	0	0	0	0	0	0	0	0	0	0	0	0	0	0	0	0	0
	137	0	0	0	0	0	0	0	0	0	0	0	0	0	0	0	0	0	0	0	0									137	0	0	0	0	0	0	0	0	0	0	0	0	0	0	0	0	0	0	0
	138	0	0	0	0	0	0	0	0	0	0	0	0	0	0	0	0	0	0	0	0									138	0	0	0	0	0	0	0	0	0	0	0	0	0	0	0	0	0	0	0
	139	0	0	0	0	0	0	0	0	0	0	0	0	0	0	0	0	0	0	0	0									139	0	0	0	0	0	0	0	0	0	0	0	0	0	0	0	0	0	0	0
	140	0	0	0	0	0	0	0	0	0	0	0	0	0	0	0	0	0	0	0	0									140	0	0	0	0	0	0	0	0	0	0	0	0	0	0	0	0	0	0	0
	141	0	0	0	0	0	0	0	0	0	0	0	0	0	0	0	0	0	0	0	0									141	0	0	0	0	0	0	0	0	0	0	0	0	0	0	0	0	0	0	0
	142	0	0	0	0	0	0	0	0	0	0	0	0	0	0	0	0	0	0	0	0									142	0	0	0	0	0	0	0	0	0	0	0	0	0	0	0	0	0	0	0
	143	0	0	0	0	0	0	0	0	0	0	0	0	0	0	0	0	0	0	0	0									143	0	0	0	0	0	0	0	0	0	0	0	0	0	0	0	0	0	0	0
	144	0	0	0	0	0	0	0	0	0	0	0	0	0	0	0	0	0	0	0	0									144	0	0	0	0	0	0	0	0	0	0	0	0	0	0	0	0	0	0	0
	145	0	0	0	0	0	0	0	0	0	0	0	0	0	0	0	0	0	0	0	0									145	0	0	0	0	0	0	0	0	0	0	0	0	0	0	0	0	0	0	0
	146	0	0	0	0	0	0	0	0	0	0	0	0	0	0	0	0	0	0	0	0									146	0	0	0	0	0	0	0	0	0	0	0	0	0	0	0	0	0	0	0
	147	0	0	0	0	0	0	0	0	0	0	0	0	0	0	0	0	0	0	0	0									147	0	0	0	0	0	0	0	0	0	0	0	0	0	0	0	0	0	0	0
	148	0	0	0	0	0	0	0	0	0	0	0	0	0	0	0	0	0	0	0	0									148	0	0	0	0	0	0	0	0	0	0	0	0	0	0	0	0	0	0	0
	149	0	0	0	0	0	0	0	0	0	0	0	0	0	0	0	0	0	0	0	0									149	0	0	0	0	0	0	0	0	0	0	0	0	0	0	0	0	0	0	0
	150	0	0	0	0	0	0	0	0	0	0	0	0	0	0	0	0	0	0	0	0									150	0	0	0	0	0	0	0	0	0	0	0	0	0	0	0	0	0	0	0
	151	0	0	0	0	0	0	0	0	0	0	0	0	0	0	0	0	0	0	0	0									151	0	0	0	0	0	0	0	0	0	0	0	0	0	0	0	0	0	0	0
	152	0	0	0	0	0	0	0	0	0	0	0	0	0	0	0	0	0	0	0	0									152	0	0	0	0	0	0	0	0	0	0	0	0	0	0	0	0	0	0	0
	153	0	0	0	0	0	0	0	0	0	0	0	0	0	0	0	0	0	0	0	0									153	0	0	0	0	0	0	0	0	0	0	0	0	0	0	0	0	0	0	0
	154	0	0	0	0	0	0	0	0	0	0	0	0	0	0	0	0	0	0	0	0									154	0	0	0	0	0	0	0	0	0	0	0	0	0	0	0	0	0	0	0
	155	0	0	0	0	0	0	0	0	0	0	0	0	0	0	0	0	0	0	0	0									155	0	0	0	0	0	0	0	0	0	0	0	0	0	0	0	0	0	0	0
	156	0	0	0	0	0	0	0	0	0	0	0	0	0	0	0	0	0	0	0	0									156	0	0	0	0	0	0	0	0	0	0	0	0	0	0	0	0	0	0	0
	157	0	0	0	0	0	0	0	0	0	0	0	0	0	0	0	0	0	0	0	0									157	0	0	0	0	0	0	0	0	0	0	0	0	0	0	0	0	0	0	0
	158	0	0	0	0	0	0	0	0	0	0	0	0	0	0	0	0	0	0	0	0									158	0	0	0	0	0	0	0	0	0	0	0	0	0	0	0	0	0	0	0
	159	0	0	0	0	0	0	0	0	0	0	0	0	0	0	0	0	0	0	0	0									159	0	0	0	0	0	0	0	0	0	0	0	0	0	0	0	0	0	0	0
	160	0	0	0	0	0	0	0	0	0	0	0	0	0	0	0	0	0	0	0	0									160	0	0	0	0	0	0	0	0	0	0	0	0	0	0	0	0	0	0	0
	161	0	0	0	0	0	0	0	0	0	0	0	0	0	0	0	0	0	0	0	0									161	0	0	0	0	0	0	0	0	0	0	0	0	0	0	0	0	0	0	0
	162	0	0	0	0	0	0	0	0	0	0	0	0	0	0	0	0	0	0	0	0									162	0	0	0	0	0	0	0	0	0	0	0	0	0	0	0	0	0	0	0
	163	0	0	0	0	0	0	0	0	0	0	0	0	0	0	0	0	0	0	0	0									163	0	0	0	0	0	0	0	0	0	0	0	0	0	0	0	0	0	0	0
	164	0	0	0	0	0	0	0	0	0	0	0	0	0	0	0	0	0	0	0	0									164	0	0	0	0	0	0	0	0	0	0	0	0	0	0	0	0	0	0	0
	165	0	0	0	0	0	0	0	0	0	0	0	0	0	0	0	0	0	0	0	0									165	0	0	0	0	0	0	0	0	0	0	0	0	0	0	0	0	0	0	0
	166	0	0	0	0	0	0	0	0	0	0	0	0	0	0	0	0	0	0	0	0									166	0	0	0	0	0	0	0	0	0	0	0	0	0	0	0	0	0	0	0
	167	0	0	0	0	0	0	0	0	0	0	0	0	0	0	0	0	0	0	0	0									167	0	0	0	0	0	0	0	0	0	0	0	0	0	0	0	0	0	0	0
	168	0	0	0	0	0	0	0	0	0	0	0	0	0	0	0	0	0	0	0	0									168	0	0	0	0	0	0	0	0	0	0	0	0	0	0	0	0	0	0	0
	169	0	0	0	0	0	0	0	0	0	0	0	0	0	0	0	0	0	0	0	0									169	0	0	0	0	0	0	0	0	0	0	0	0	0	0	0	0	0	0	0
	170	0	0	0	0	0	0	0	0	0	0	0	0	0	0	0	0	0	0	0	0									170	0	0	0	0	0	0	0	0	0	0	0	0	0	0	0	0	0	0	0
	171	0	0	0	0	0	0	0	0	0	0	0	0	0	0	0	0	0	0	0	0									171	0	0	0	0	0	0	0	0	0	0	0	0	0	0	0	0	0	0	0
	172	0	0	0	0	0	0	0	0	0	0	0	0	0	0	0	0	0	0	0	0									172	0	0	0	0	0	0	0	0	0	0	0	0	0	0	0	0	0	0	0
	173	0	0	0	0	0	0	0	0	0	0	0	0	0	0	0	0	0	0	0	0									173	0	0	0	0	0	0	0	0	0	0	0	0	0	0	0	0	0	0	0
	174	0	0	0	0	0	0	0	0	0	0	0	0	0	0	0	0	0	0	0	0									174	0	0	0	0	0	0	0	0	0	0	0	0	0	0	0	0	0	0	0
	175	0	0	0	0	0	0	0	0	0	0	0	0	0	0	0	0	0	0	0	0									175	0	0	0	0	0	0	0	0	0	0	0	0	0	0	0	0	0	0	0
	176	0	0	0	0	0	0	0	0	0	0	0	0	0	0	0	0	0	0	0	0									176	0	0	0	0	0	0	0	0	0	0	0	0	0	0	0	0	0	0	0
	177	0	0	0	0	0	0	0	0	0	0	0	0	0	0	0	0	0	0	0	0									177	0	0	0	0	0	0	0	0	0	0	0	0	0	0	0	0	0	0	0
	178	0	0	0	0	0	0	0	0	0	0	0	0	0	0	0	0	0	0	0	0									178	0	0	0	0	0	0	0	0	0	0	0	0	0	0	0	0	0	0	0
	179	0	0	0	0	0	0	0	0	0	0	0	0	0	0	0	0	0	0	0	0									179	0	0	0	0	0	0	0	0	0	0	0	0	0	0	0	0	0	0	0
	180	0	0	0	0	0	0	0	0	0	0	0	0	0	0	0	0	0	0	0	0									180	0	0	0	0	0	0	0	0	0	0	0	0	0	0	0	0	0	0	0
	181	0	0	0	0	0	0	0	0	0	0	0	0	0	0	0	0	0	0	0	0									181	0	0	0	0	0	0	0	0	0	0	0	0	0	0	0	0	0	0	0
	182	0	0	0	0	0	0	0	0	0	0	0	0	0	0	0	0	0	0	0	0									182	0	0	0	0	0	0	0	0	0	0	0	0	0	0	0	0	0	0	0
	183	0	0	0	0	0	0	0	0	0	0	0	0	0	0	0	0	0	0	0	0									183	0	0	0	0	0	0	0	0	0	0	0	0	0	0	0	0	0	0	0
	184	0	0	0	0	0	0	0	0	0	0	0	0	0	0	0	0	0	0	0	0									184	0	0	0	0	0	0	0	0	0	0	0	0	0	0	0	0	0	0	0
	185	0	0	0	0	0	0	0	0	0	0	0	0	0	0	0	0	0	0	0	0									185	0	0	0	0	0	0	0	0	0	0	0	0	0	0	0	0	0	0	0
	186	0	0	0	0	0	0	0	0	0	0	0	0	0	0	0	0	0	0	0	0									186	0	0	0	0	0	0	0	0	0	0	0	0	0	0	0	0	0	0	0
	187	0	0	0	0	0	0	0	0	0	0	0	0	0	0	0	0	0	0	0	0									187	0	0	0	0	0	0	0	0	0	0	0	0	0	0	0	0	0	0	0
	188	0	0	0	0	0	0	0	0	0	0	0	0	0	0	0	0	0	0	0	0									188	0	0	0	0	0	0	0	0	0	0	0	0	0	0	0	0	0	0	0
	189	0	0	0	0	0	0	0	0	0	0	0	0	0	0	0	0	0	0	0	0									189	0	0	0	0	0	0	0	0	0	0	0	0	0	0	0	0	0	0	0
	190	0	0	0	0	0	0	0	0	0	0	0	0	0	0	0	0	0	0	0	0									190	0	0	0	0	0	0	0	0	0	0	0	0	0	0	0	0	0	0	0
	191	0	0	0	0	0	0	0	0	0	0	0	0	0	0	0	0	0	0	0	0									191	0	0	0	0	0	0	0	0	0	0	0	0	0	0	0	0	0	0	0
	192	0	0	0	0	0	0	0	0	0	0	0	0	0	0	0	0	0	0	0	0									192	0	0	0	0	0	0	0	0	0	0	0	0	0	0	0	0	0	0	0
	193	0	0	0	0	0	0	0	0	0	0	0	0	0	0	0	0	0	0	0	0									193	0	0	0	0	0	0	0	0	0	0	0	0	0	0	0	0	0	0	0
	194	0	0	0	0	0	0	0	0	0	0	0	0	0	0	0	0	0	0	0	0									194	0	0	0	0	0	0	0	0	0	0	0	0	0	0	0	0	0	0	0
	195	0	0	0	0	0	0	0	0	0	0	0	0	0	0	0	0	0	0	0	0									195	0	0	0	0	0	0	0	0	0	0	0	0	0	0	0	0	0	0	0
	196	0	0	0	0	0	0	0	0	0	0	0	0	0	0	0	0	0	0	0	0									196	0	0	0	0	0	0	0	0	0	0	0	0	0	0	0	0	0	0	0
	197	0	0	0	0	0	0	0	0	0	0	0	0	0	0	0	0	0	0	0	0									197	0	0	0	0	0	0	0	0	0	0	0	0	0	0	0	0	0	0	0
	198	0	0	0	0	0	0	0	0	0	0	0	0	0	0	0	0	0	0	0	0									198	0	0	0	0	0	0	0	0	0	0	0	0	0	0	0	0	0	0	0
	199	0	0	0	0	0	0	0	0	0	0	0	0	0	0	0	0	0	0	0	0									199	0	0	0	0	0	0	0	0	0	0	0	0	0	0	0	0	0	0	0
	200	0	0	0	0	0	0	0	0	0	0	0	0	0	0	0	0	0	0	0	0									200	0	0	0	0	0	0	0	0	0	0	0	0	0	0	0	0	0	0	0
	201	0	0	0	0	0	0	0	0	0	0	0	0	0	0	0	0	0	0	0	0									201	0	0	0	0	0	0	0	0	0	0	0	0	0	0	0	0	0	0	0
	202	0	0	0	0	0	0	0	0	0	0	0	0	0	0	0	0	0	0	0	0									202	0	0	0	0	0	0	0	0	0	0	0	0	0	0	0	0	0	0	0
	203	0	0	0	0	0	0	0	0	0	0	0	0	0	0	0	0	0	0	0	0									203	0	0	0	0	0	0	0	0	0	0	0	0	0	0	0	0	0	0	0
	204	0	0	0	0	0	0	0	0	0	0	0	0	0	0	0	0	0	0	0	0									204	0	0	0	0	0	0	0	0	0	0	0	0	0	0	0	0	0	0	0
	205	0	0	0	0	0	0	0	0	0	0	0	0	0	0	0	0	0	0	0	0									205	0	0	0	0	0	0	0	0	0	0	0	0	0	0	0	0	0	0	0
	206	0	0	0	0	0	0	0	0	0	0	0	0	0	0	0	0	0	0	0	0									206	0	0	0	0	0	0	0	0	0	0	0	0	0	0	0	0	0	0	0
	207	0	0	0	0	0	0	0	0	0	0	0	0	0	0	0	0	0	0	0	0									207	0	0	0	0	0	0	0	0	0	0	0	0	0	0	0	0	0	0	0
	208	0	0	0	0	0	0	0	0	0	0	0	0	0	0	0	0	0	0	0	0									208	0	0	0	0	0	0	0	0	0	0	0	0	0	0	0	0	0	0	0
	209	0	0	0	0	0	0	0	0	0	0	0	0	0	0	0	0	0	0	0	0									209	0	0	0	0	0	0	0	0	0	0	0	0	0	0	0	0	0	0	0
	210	0	0	0	0	0	0	0	0	0	0	0	0	0	0	0	0	0	0	0	0									210	0	0	0	0	0	0	0	0	0	0	0	0	0	0	0	0	0	0	0
	211	0	0	0	0	0	0	0	0	0	0	0	0	0	0	0	0	0	0	0	0									211	0	0	0	0	0	0	0	0	0	0	0	0	0	0	0	0	0	0	0
	212	0	0	0	0	0	0	0	0	0	0	0	0	0	0	0	0	0	0	0	0									212	0	0	0	0	0	0	0	0	0	0	0	0	0	0	0	0	0	0	0
	213	0	0	0	0	0	0	0	0	0	0	0	0	0	0	0	0	0	0	0	0									213	0	0	0	0	0	0	0	0	0	0	0	0	0	0	0	0	0	0	0
	214	0	0	0	0	0	0	0	0	0	0	0	0	0	0	0	0	0	0	0	0									214	0	0	0	0	0	0	0	0	0	0	0	0	0	0	0	0	0	0	0
	215	0	0	0	0	0	0	0	0	0	0	0	0	0	0	0	0	0	0	0	0									215	0	0	0	0	0	0	0	0	0	0	0	0	0	0	0	0	0	0	0
	216	0	0	0	0	0	0	0	0	0	0	0	0	0	0	0	0	0	0	0	0									216	0	0	0	0	0	0	0	0	0	0	0	0	0	0	0	0	0	0	0
	217	0	0	0	0	0	0	0	0	0	0	0	0	0	0	0	0	0	0	0	0									217	0	0	0	0	0	0	0	0	0	0	0	0	0	0	0	0	0	0	0
	218	0	0	0	0	0	0	0	0	0	0	0	0	0	0	0	0	0	0	0	0									218	0	0	0	0	0	0	0	0	0	0	0	0	0	0	0	0	0	0	0
	219	0	0	0	0	0	0	0	0	0	0	0	0	0	0	0	0	0	0	0	0									219	0	0	0	0	0	0	0	0	0	0	0	0	0	0	0	0	0	0	0
	220	0	0	0	0	0	0	0	0	0	0	0	0	0	0	0	0	0	0	0	0									220	0	0	0	0	0	0	0	0	0	0	0	0	0	0	0	0	0	0	0
	221	0	0	0	0	0	0	0	0	0	0	0	0	0	0	0	0	0	0	0	0									221	0	0	0	0	0	0	0	0	0	0	0	0	0	0	0	0	0	0	0
	222	0	0	0	0	0	0	0	0	0	0	0	0	0	0	0	0	0	0	0	0									222	0	0	0	0	0	0	0	0	0	0	0	0	0	0	0	0	0	0	0
	223	0	0	0	0	0	0	0	0	0	0	0	0	0	0	0	0	0	0	0	0									223	0	0	0	0	0	0	0	0	0	0	0	0	0	0	0	0	0	0	0
	224	0	0	0	0	0	0	0	0	0	0	0	0	0	0	0	0	0	0	0	0									224	0	0	0	0	0	0	0	0	0	0	0	0	0	0	0	0	0	0	0
	225	0	0	0	0	0	0	0	0	0	0	0	0	0	0	0	0	0	0	0	0									225	0	0	0	0	0	0	0	0	0	0	0	0	0	0	0	0	0	0	0
	226	0	0	0	0	0	0	0	0	0	0	0	0	0	0	0	0	0	0	0	0									226	0	0	0	0	0	0	0	0	0	0	0	0	0	0	0	0	0	0	0
	227	0	0	0	0	0	0	0	0	0	0	0	0	0	0	0	0	0	0	0	0									227	0	0	0	0	0	0	0	0	0	0	0	0	0	0	0	0	0	0	0
	228	0	0	0	0	0	0	0	0	0	0	0	0	0	0	0	0	0	0	0	0									228	0	0	0	0	0	0	0	0	0	0	0	0	0	0	0	0	0	0	0
	229	0	0	0	0	0	0	0	0	0	0	0	0	0	0	0	0	0	0	0	0									229	0	0	0	0	0	0	0	0	0	0	0	0	0	0	0	0	0	0	0
	230	0	0	0	0	0	0	0	0	0	0	0	0	0	0	0	0	0	0	0	0									230	0	0	0	0	0	0	0	0	0	0	0	0	0	0	0	0	0	0	0
	231	0	0	0	0	0	0	0	0	0	0	0	0	0	0	0	0	0	0	0	0									231	0	0	0	0	0	0	0	0	0	0	0	0	0	0	0	0	0	0	0
	232	0	0	0	0	0	0	0	0	0	0	0	0	0	0	0	0	0	0	0	0									232	0	0	0	0	0	0	0	0	0	0	0	0	0	0	0	0	0	0	0
	233	0	0	0	0	0	0	0	0	0	0	0	0	0	0	0	0	0	0	0	0									233	0	0	0	0	0	0	0	0	0	0	0	0	0	0	0	0	0	0	0
	234	0	0	0	0	0	0	0	0	0	0	0	0	0	0	0	0	0	0	0	0									234	0	0	0	0	0	0	0	0	0	0	0	0	0	0	0	0	0	0	0
	235	0	0	0	0	0	0	0	0	0	0	0	0	0	0	0	0	0	0	0	0									235	0	0	0	0	0	0	0	0	0	0	0	0	0	0	0	0	0	0	0
	236	0	0	0	0	0	0	0	0	0	0	0	0	0	0	0	0	0	0	0	0									236	0	0	0	0	0	0	0	0	0	0	0	0	0	0	0	0	0	0	0
	237	0	0	0	0	0	0	0	0	0	0	0	0	0	0	0	0	0	0	0	0									237	0	0	0	0	0	0	0	0	0	0	0	0	0	0	0	0	0	0	0
	238	0	0	0	0	0	0	0	0	0	0	0	0	0	0	0	0	0	0	0	0									238	0	0	0	0	0	0	0	0	0	0	0	0	0	0	0	0	0	0	0
	239	0	0	0	0	0	0	0	0	0	0	0	0	0	0	0	0	0	0	0	0									239	0	0	0	0	0	0	0	0	0	0	0	0	0	0	0	0	0	0	0
	240	0	0	0	0	0	0	0	0	0	0	0	0	0	0	0	0	0	0	0	0									240	0	0	0	0	0	0	0	0	0	0	0	0	0	0	0	0	0	0	0
	241	0	0	0	0	0	0	0	0	0	0	0	0	0	0	0	0	0	0	0	0									241	0	0	0	0	0	0	0	0	0	0	0	0	0	0	0	0	0	0	0
	242	0	0	0	0	0	0	0	0	0	0	0	0	0	0	0	0	0	0	0	0									242	0	0	0	0	0	0	0	0	0	0	0	0	0	0	0	0	0	0	0
	243	0	0	0	0	0	0	0	0	0	0	0	0	0	0	0	0	0	0	0	0									243	0	0	0	0	0	0	0	0	0	0	0	0	0	0	0	0	0	0	0
	244	0	0	0	0	0	0	0	0	0	0	0	0	0	0	0	0	0	0	0	0									244	0	0	0	0	0	0	0	0	0	0	0	0	0	0	0	0	0	0	0
	245	0	0	0	0	0	0	0	0	0	0	0	0	0	0	0	0	0	0	0	0									245	0	0	0	0	0	0	0	0	0	0	0	0	0	0	0	0	0	0	0
	246	0	0	0	0	0	0	0	0	0	0	0	0	0	0	0	0	0	0	0	0									246	0	0	0	0	0	0	0	0	0	0	0	0	0	0	0	0	0	0	0
	247	0	0	0	0	0	0	0	0	0	0	0	0	0	0	0	0	0	0	0	0									247	0	0	0	0	0	0	0	0	0	0	0	0	0	0	0	0	0	0	0
	248	0	0	0	0	0	0	0	0	0	0	0	0	0	0	0	0	0	0	0	0									248	0	0	0	0	0	0	0	0	0	0	0	0	0	0	0	0	0	0	0
	249	0	0	0	0	0	0	0	0	0	0	0	0	0	0	0	0	0	0	0	0									249	0	0	0	0	0	0	0	0	0	0	0	0	0	0	0	0	0	0	0
	250	0	0	0	0	0	0	0	0	0	0	0	0	0	0	0	0	0	0	0	0									250	0	0	0	0	0	0	0	0	0	0	0	0	0	0	0	0	0	0	0
	251	0	0	0	0	0	0	0	0	0	0	0	0	0	0	0	0	0	0	0	0									251	0	0	0	0	0	0	0	0	0	0	0	0	0	0	0	0	0	0	0
	252	0	0	0	0	0	0	0	0	0	0	0	0	0	0	0	0	0	0	0	0									252	0	0	0	0	0	0	0	0	0	0	0	0	0	0	0	0	0	0	0
	253	0	0	0	0	0	0	0	0	0	0	0	0	0	0	0	0	0	0	0	0									253	0	0	0	0	0	0	0	0	0	0	0	0	0	0	0	0	0	0	0
	254	0	0	0	0	0	0	0	0	0	0	0	0	0	0	0	0	0	0	0	0									254	0	0	0	0	0	0	0	0	0	0	0	0	0	0	0	0	0	0	0
	255	0	0	0	0	0	0	0	0	0	0	0	0	0	0	0	0	0	0	0	0									255	0	0	0	0	0	0	0	0	0	0	0	0	0	0	0	0	0	0	0
	256	0	0	0	0	0	0	0	0	0	0	0	0	0	0	0	0	0	0	0	0									256	0	0	0	0	0	0	0	0	0	0	0	0	0	0	0	0	0	0	0
	257	0	0	0	0	0	0	0	0	0	0	0	0	0	0	0	0	0	0	0	0									257	0	0	0	0	0	0	0	0	0	0	0	0	0	0	0	0	0	0	0
	258	0	0	0	0	0	0	0	0	0	0	0	0	0	0	0	0	0	0	0	0									258	0	0	0	0	0	0	0	0	0	0	0	0	0	0	0	0	0	0	0
	259	0	0	0	0	0	0	0	0	0	0	0	0	0	0	0	0	0	0	0	0									259	0	0	0	0	0	0	0	0	0	0	0	0	0	0	0	0	0	0	0
	260	0	0	0	0	0	0	0	0	0	0	0	0	0	0	0	0	0	0	0	0									260	0	0	0	0	0	0	0	0	0	0	0	0	0	0	0	0	0	0	0
	261	0	0	0	0	0	0	0	0	0	0	0	0	0	0	0	0	0	0	0	0									261	0	0	0	0	0	0	0	0	0	0	0	0	0	0	0	0	0	0	0
	262	0	0	0	0	0	0	0	0	0	0	0	0	0	0	0	0	0	0	0	0									262	0	0	0	0	0	0	0	0	0	0	0	0	0	0	0	0	0	0	0
	263	0	0	0	0	0	0	0	0	0	0	0	0	0	0	0	0	0	0	0	0									263	0	0	0	0	0	0	0	0	0	0	0	0	0	0	0	0	0	0	0
	264	0	0	0	0	0	0	0	0	0	0	0	0	0	0	0	0	0	0	0	0									264	0	0	0	0	0	0	0	0	0	0	0	0	0	0	0	0	0	0	0
	265	0	0	0	0	0	0	0	0	0	0	0	0	0	0	0	0	0	0	0	0									265	0	0	0	0	0	0	0	0	0	0	0	0	0	0	0	0	0	0	0
	266	0	0	0	0	0	0	0	0	0	0	0	0	0	0	0	0	0	0	0	0									266	0	0	0	0	0	0	0	0	0	0	0	0	0	0	0	0	0	0	0
	267	0	0	0	0	0	0	0	0	0	0	0	0	0	0	0	0	0	0	0	0									267	0	0	0	0	0	0	0	0	0	0	0	0	0	0	0	0	0	0	0
	268	0	0	0	0	0	0	0	0	0	0	0	0	0	0	0	0	0	0	0	0									268	0	0	0	0	0	0	0	0	0	0	0	0	0	0	0	0	0	0	0
	269	0	0	0	0	0	0	0	0	0	0	0	0	0	0	0	0	0	0	0	0									269	0	0	0	0	0	0	0	0	0	0	0	0	0	0	0	0	0	0	0
	270	0	0	0	0	0	0	0	0	0	0	0	0	0	0	0	0	0	0	0	0									270	0	0	0	0	0	0	0	0	0	0	0	0	0	0	0	0	0	0	0
	271	0	0	0	0	0	0	0	0	0	0	0	0	0	0	0	0	0	0	0	0									271	0	0	0	0	0	0	0	0	0	0	0	0	0	0	0	0	0	0	0
	272	0	0	0	0	0	0	0	0	0	0	0	0	0	0	0	0	0	0	0	0									272	0	0	0	0	0	0	0	0	0	0	0	0	0	0	0	0	0	0	0
	273	0	0	0	0	0	0	0	0	0	0	0	0	0	0	0	0	0	0	0	0									273	0	0	0	0	0	0	0	0	0	0	0	0	0	0	0	0	0	0	0
	274	0	0	0	0	0	0	0	0	0	0	0	0	0	0	0	0	0	0	0	0									274	0	0	0	0	0	0	0	0	0	0	0	0	0	0	0	0	0	0	0
	275	0	0	0	0	0	0	0	0	0	0	0	0	0	0	0	0	0	0	0	0									275	0	0	0	0	0	0	0	0	0	0	0	0	0	0	0	0	0	0	0
	276	0	0	0	0	0	0	0	0	0	0	0	0	0	0	0	0	0	0	0	0									276	0	0	0	0	0	0	0	0	0	0	0	0	0	0	0	0	0	0	0
	277	0	0	0	0	0	0	0	0	0	0	0	0	0	0	0	0	0	0	0	0									277	0	0	0	0	0	0	0	0	0	0	0	0	0	0	0	0	0	0	0
	278	0	0	0	0	0	0	0	0	0	0	0	0	0	0	0	0	0	0	0	0									278	0	0	0	0	0	0	0	0	0	0	0	0	0	0	0	0	0	0	0
	279	0	0	0	0	0	0	0	0	0	0	0	0	0	0	0	0	0	0	0	0									279	0	0	0	0	0	0	0	0	0	0	0	0	0	0	0	0	0	0	0
	280	0	0	0	0	0	0	0	0	0	0	0	0	0	0	0	0	0	0	0	0									280	0	0	0	0	0	0	0	0	0	0	0	0	0	0	0	0	0	0	0
	281	0	0	0	0	0	0	0	0	0	0	0	0	0	0	0	0	0	0	0	0									281	0	0	0	0	0	0	0	0	0	0	0	0	0	0	0	0	0	0	0
	282	0	0	0	0	0	0	0	0	0	0	0	0	0	0	0	0	0	0	0	0									282	0	0	0	0	0	0	0	0	0	0	0	0	0	0	0	0	0	0	0
	283	0	0	0	0	0	0	0	0	0	0	0	0	0	0	0	0	0	0	0	0									283	0	0	0	0	0	0	0	0	0	0	0	0	0	0	0	0	0	0	0
	284	0	0	0	0	0	0	0	0	0	0	0	0	0	0	0	0	0	0	0	0									284	0	0	0	0	0	0	0	0	0	0	0	0	0	0	0	0	0	0	0
	285	0	0	0	0	0	0	0	0	0	0	0	0	0	0	0	0	0	0	0	0									285	0	0	0	0	0	0	0	0	0	0	0	0	0	0	0	0	0	0	0
	286	0	0	0	0	0	0	0	0	0	0	0	0	0	0	0	0	0	0	0	0									286	0	0	0	0	0	0	0	0	0	0	0	0	0	0	0	0	0	0	0
	287	0	0	0	0	0	0	0	0	0	0	0	0	0	0	0	0	0	0	0	0									287	0	0	0	0	0	0	0	0	0	0	0	0	0	0	0	0	0	0	0
	288	0	0	0	0	0	0	0	0	0	0	0	0	0	0	0	0	0	0	0	0									288	0	0	0	0	0	0	0	0	0	0	0	0	0	0	0	0	0	0	0
	289	0	0	0	0	0	0	0	0	0	0	0	0	0	0	0	0	0	0	0	0									289	0	0	0	0	0	0	0	0	0	0	0	0	0	0	0	0	0	0	0
	290	0	0	0	0	0	0	0	0	0	0	0	0	0	0	0	0	0	0	0	0									290	0	0	0	0	0	0	0	0	0	0	0	0	0	0	0	0	0	0	0
	291	0	0	0	0	0	0	0	0	0	0	0	0	0	0	0	0	0	0	0	0									291	0	0	0	0	0	0	0	0	0	0	0	0	0	0	0	0	0	0	0
	292	0	0	0	0	0	0	0	0	0	0	0	0	0	0	0	0	0	0	0	0									292	0	0	0	0	0	0	0	0	0	0	0	0	0	0	0	0	0	0	0
	293	0	0	0	0	0	0	0	0	0	0	0	0	0	0	0	0	0	0	0	0									293	0	0	0	0	0	0	0	0	0	0	0	0	0	0	0	0	0	0	0
	294	0	0	0	0	0	0	0	0	0	0	0	0	0	0	0	0	0	0	0	0									294	0	0	0	0	0	0	0	0	0	0	0	0	0	0	0	0	0	0	0
	295	0	0	0	0	0	0	0	0	0	0	0	0	0	0	0	0	0	0	0	0									295	0	0	0	0	0	0	0	0	0	0	0	0	0	0	0	0	0	0	0
	296	0	0	0	0	0	0	0	0	0	0	0	0	0	0	0	0	0	0	0	0									296	0	0	0	0	0	0	0	0	0	0	0	0	0	0	0	0	0	0	0
	297	0	0	0	0	0	0	0	0	0	0	0	0	0	0	0	0	0	0	0	0									297	0	0	0	0	0	0	0	0	0	0	0	0	0	0	0	0	0	0	0
	298	0	0	0	0	0	0	0	0	0	0	0	0	0	0	0	0	0	0	0	0									298	0	0	0	0	0	0	0	0	0	0	0	0	0	0	0	0	0	0	0
	299	0	0	0	0	0	0	0	0	0	0	0	0	0	0	0	0	0	0	0	0									299	0	0	0	0	0	0	0	0	0	0	0	0	0	0	0	0	0	0	0
	300	0	0	0	0	0	0	0	0	0	0	0	0	0	0	0	0	0	0	0	0									300	0	0	0	0	0	0	0	0	0	0	0	0	0	0	0	0	0	0	0
	301	0	0	0	0	0	0	0	0	0	0	0	0	0	0	0	0	0	0	0	0									301	0	0	0	0	0	0	0	0	0	0	0	0	0	0	0	0	0	0	0
	302	0	0	0	0	0	0	0	0	0	0	0	0	0	0	0	0	0	0	0	0									302	0	0	0	0	0	0	0	0	0	0	0	0	0	0	0	0	0	0	0
	303	0	0	0	0	0	0	0	0	0	0	0	0	0	0	0	0	0	0	0	0									303	0	0	0	0	0	0	0	0	0	0	0	0	0	0	0	0	0	0	0
	304	0	0	0	0	0	0	0	0	0	0	0	0	0	0	0	0	0	0	0	0									304	0	0	0	0	0	0	0	0	0	0	0	0	0	0	0	0	0	0	0
	305	0	0	0	0	0	0	0	0	0	0	0	0	0	0	0	0	0	0	0	0									305	0	0	0	0	0	0	0	0	0	0	0	0	0	0	0	0	0	0	0
	306	0	0	0	0	0	0	0	0	0	0	0	0	0	0	0	0	0	0	0	0									306	0	0	0	0	0	0	0	0	0	0	0	0	0	0	0	0	0	0	0
	307	0	0	0	0	0	0	0	0	0	0	0	0	0	0	0	0	0	0	0	0									307	0	0	0	0	0	0	0	0	0	0	0	0	0	0	0	0	0	0	0
	308	0	0	0	0	0	0	0	0	0	0	0	0	0	0	0	0	0	0	0	0									308	0	0	0	0	0	0	0	0	0	0	0	0	0	0	0	0	0	0	0
	309	0	0	0	0	0	0	0	0	0	0	0	0	0	0	0	0	0	0	0	0									309	0	0	0	0	0	0	0	0	0	0	0	0	0	0	0	0	0	0	0
	310	0	0	0	0	0	0	0	0	0	0	0	0	0	0	0	0	0	0	0	0									310	0	0	0	0	0	0	0	0	0	0	0	0	0	0	0	0	0	0	0
	311	0	0	0	0	0	0	0	0	0	0	0	0	0	0	0	0	0	0	0	0									311	0	0	0	0	0	0	0	0	0	0	0	0	0	0	0	0	0	0	0
	312	0	0	0	0	0	0	0	0	0	0	0	0	0	0	0	0	0	0	0	0									312	0	0	0	0	0	0	0	0	0	0	0	0	0	0	0	0	0	0	0
	313	0	0	0	0	0	0	0	0	0	0	0	0	0	0	0	0	0	0	0	0									313	0	0	0	0	0	0	0	0	0	0	0	0	0	0	0	0	0	0	0
	314	0	0	0	0	0	0	0	0	0	0	0	0	0	0	0	0	0	0	0	0									314	0	0	0	0	0	0	0	0	0	0	0	0	0	0	0	0	0	0	0
	315	0	0	0	0	0	0	0	0	0	0	0	0	0	0	0	0	0	0	0	0									315	0	0	0	0	0	0	0	0	0	0	0	0	0	0	0	0	0	0	0
	316	0	0	0	0	0	0	0	0	0	0	0	0	0	0	0	0	0	0	0	0									316	0	0	0	0	0	0	0	0	0	0	0	0	0	0	0	0	0	0	0
	317	0	0	0	0	0	0	0	0	0	0	0	0	0	0	0	0	0	0	0	0									317	0	0	0	0	0	0	0	0	0	0	0	0	0	0	0	0	0	0	0
	318	0	0	0	0	0	0	0	0	0	0	0	0	0	0	0	0	0	0	0	0									318	0	0	0	0	0	0	0	0	0	0	0	0	0	0	0	0	0	0	0
	319	0	0	0	0	0	0	0	0	0	0	0	0	0	0	0	0	0	0	0	0									319	0	0	0	0	0	0	0	0	0	0	0	0	0	0	0	0	0	0	0
	320	0	0	0	0	0	0	0	0	0	0	0	0	0	0	0	0	0	0	0	0									320	0	0	0	0	0	0	0	0	0	0	0	0	0	0	0	0	0	0	0
	321	0	0	0	0	0	0	0	0	0	0	0	0	0	0	0	0	0	0	0	0									321	0	0	0	0	0	0	0	0	0	0	0	0	0	0	0	0	0	0	0
	322	0	0	0	0	0	0	0	0	0	0	0	0	0	0	0	0	0	0	0	0									322	0	0	0	0	0	0	0	0	0	0	0	0	0	0	0	0	0	0	0
	323	0	0	0	0	0	0	0	0	0	0	0	0	0	0	0	0	0	0	0	0									323	0	0	0	0	0	0	0	0	0	0	0	0	0	0	0	0	0	0	0
	324	0	0	0	0	0	0	0	0	0	0	0	0	0	0	0	0	0	0	0	0									324	0	0	0	0	0	0	0	0	0	0	0	0	0	0	0	0	0	0	0
	325	0	0	0	0	0	0	0	0	0	0	0	0	0	0	0	0	0	0	0	0									325	0	0	0	0	0	0	0	0	0	0	0	0	0	0	0	0	0	0	0
	326	0	0	0	0	0	0	0	0	0	0	0	0	0	0	0	0	0	0	0	0									326	0	0	0	0	0	0	0	0	0	0	0	0	0	0	0	0	0	0	0
	327	0	0	0	0	0	0	0	0	0	0	0	0	0	0	0	0	0	0	0	0									327	0	0	0	0	0	0	0	0	0	0	0	0	0	0	0	0	0	0	0
	328	0	0	0	0	0	0	0	0	0	0	0	0	0	0	0	0	0	0	0	0									328	0	0	0	0	0	0	0	0	0	0	0	0	0	0	0	0	0	0	0
	329	0	0	0	0	0	0	0	0	0	0	0	0	0	0	0	0	0	0	0	0									329	0	0	0	0	0	0	0	0	0	0	0	0	0	0	0	0	0	0	0
	330	0	0	0	0	0	0	0	0	0	0	0	0	0	0	0	0	0	0	0	0									330	0	0	0	0	0	0	0	0	0	0	0	0	0	0	0	0	0	0	0
	331	0	0	0	0	0	0	0	0	0	0	0	0	0	0	0	0	0	0	0	0									331	0	0	0	0	0	0	0	0	0	0	0	0	0	0	0	0	0	0	0
	332	0	0	0	0	0	0	0	0	0	0	0	0	0	0	0	0	0	0	0	0									332	0	0	0	0	0	0	0	0	0	0	0	0	0	0	0	0	0	0	0
	333	0	0	0	0	0	0	0	0	0	0	0	0	0	0	0	0	0	0	0	0									333	0	0	0	0	0	0	0	0	0	0	0	0	0	0	0	0	0	0	0
	334	0	0	0	0	0	0	0	0	0	0	0	0	0	0	0	0	0	0	0	0									334	0	0	0	0	0	0	0	0	0	0	0	0	0	0	0	0	0	0	0
	335	0	0	0	0	0	0	0	0	0	0	0	0	0	0	0	0	0	0	0	0									335	0	0	0	0	0	0	0	0	0	0	0	0	0	0	0	0	0	0	0
	336	0	0	0	0	0	0	0	0	0	0	0	0	0	0	0	0	0	0	0	0									336	0	0	0	0	0	0	0	0	0	0	0	0	0	0	0	0	0	0	0
	337	0	0	0	0	0	0	0	0	0	0	0	0	0	0	0	0	0	0	0	0									337	0	0	0	0	0	0	0	0	0	0	0	0	0	0	0	0	0	0	0
	338	0	0	0	0	0	0	0	0	0	0	0	0	0	0	0	0	0	0	0	0									338	0	0	0	0	0	0	0	0	0	0	0	0	0	0	0	0	0	0	0
	339	0	0	0	0	0	0	0	0	0	0	0	0	0	0	0	0	0	0	0	0									339	0	0	0	0	0	0	0	0	0	0	0	0	0	0	0	0	0	0	0
	340	0	0	0	0	0	0	0	0	0	0	0	0	0	0	0	0	0	0	0	0									340	0	0	0	0	0	0	0	0	0	0	0	0	0	0	0	0	0	0	0
	341	0	0	0	0	0	0	0	0	0	0	0	0	0	0	0	0	0	0	0	0									341	0	0	0	0	0	0	0	0	0	0	0	0	0	0	0	0	0	0	0
	342	0	0	0	0	0	0	0	0	0	0	0	0	0	0	0	0	0	0	0	0									342	0	0	0	0	0	0	0	0	0	0	0	0	0	0	0	0	0	0	0
	343	0	0	0	0	0	0	0	0	0	0	0	0	0	0	0	0	0	0	0	0									343	0	0	0	0	0	0	0	0	0	0	0	0	0	0	0	0	0	0	0
	344	0	0	0	0	0	0	0	0	0	0	0	0	0	0	0	0	0	0	0	0									344	0	0	0	0	0	0	0	0	0	0	0	0	0	0	0	0	0	0	0
	345	0	0	0	0	0	0	0	0	0	0	0	0	0	0	0	0	0	0	0	0									345	0	0	0	0	0	0	0	0	0	0	0	0	0	0	0	0	0	0	0
	346	0	0	0	0	0	0	0	0	0	0	0	0	0	0	0	0	0	0	0	0									346	0	0	0	0	0	0	0	0	0	0	0	0	0	0	0	0	0	0	0
	347	0	0	0	0	0	0	0	0	0	0	0	0	0	0	0	0	0	0	0	0									347	0	0	0	0	0	0	0	0	0	0	0	0	0	0	0	0	0	0	0
	348	0	0	0	0	0	0	0	0	0	0	0	0	0	0	0	0	0	0	0	0									348	0	0	0	0	0	0	0	0	0	0	0	0	0	0	0	0	0	0	0
	349	0	0	0	0	0	0	0	0	0	0	0	0	0	0	0	0	0	0	0	0									349	0	0	0	0	0	0	0	0	0	0	0	0	0	0	0	0	0	0	0
	350	0	0	0	0	0	0	0	0	0	0	0	0	0	0	0	0	0	0	0	0									350	0	0	0	0	0	0	0	0	0	0	0	0	0	0	0	0	0	0	0
	351	0	0	0	0	0	0	0	0	0	0	0	0	0	0	0	0	0	0	0	0									351	0	0	0	0	0	0	0	0	0	0	0	0	0	0	0	0	0	0	0
	352	0	0	0	0	0	0	0	0	0	0	0	0	0	0	0	0	0	0	0	0									352	0	0	0	0	0	0	0	0	0	0	0	0	0	0	0	0	0	0	0
	353	0	0	0	0	0	0	0	0	0	0	0	0	0	0	0	0	0	0	0	0									353	0	0	0	0	0	0	0	0	0	0	0	0	0	0	0	0	0	0	0
	354	0	0	0	0	0	0	0	0	0	0	0	0	0	0	0	0	0	0	0	0									354	0	0	0	0	0	0	0	0	0	0	0	0	0	0	0	0	0	0	0
	355	0	0	0	0	0	0	0	0	0	0	0	0	0	0	0	0	0	0	0	0									355	0	0	0	0	0	0	0	0	0	0	0	0	0	0	0	0	0	0	0
	356	0	0	0	0	0	0	0	0	0	0	0	0	0	0	0	0	0	0	0	0									356	0	0	0	0	0	0	0	0	0	0	0	0	0	0	0	0	0	0	0
	357	0	0	0	0	0	0	0	0	0	0	0	0	0	0	0	0	0	0	0	0									357	0	0	0	0	0	0	0	0	0	0	0	0	0	0	0	0	0	0	0
	358	0	0	0	0	0	0	0	0	0	0	0	0	0	0	0	0	0	0	0	0									358	0	0	0	0	0	0	0	0	0	0	0	0	0	0	0	0	0	0	0
	359	0	0	0	0	0	0	0	0	0	0	0	0	0	0	0	0	0	0	0	0									359	0	0	0	0	0	0	0	0	0	0	0	0	0	0	0	0	0	0	0
	360	0	0	0	0	0	0	0	0	0	0	0	0	0	0	0	0	0	0	0	0									360	0	0	0	0	0	0	0	0	0	0	0	0	0	0	0	0	0	0	0
	361	0	0	0	0	0	0	0	0	0	0	0	0	0	0	0	0	0	0	0	0									361	0	0	0	0	0	0	0	0	0	0	0	0	0	0	0	0	0	0	0
	362	0	0	0	0	0	0	0	0	0	0	0	0	0	0	0	0	0	0	0	0									362	0	0	0	0	0	0	0	0	0	0	0	0	0	0	0	0	0	0	0
	363	0	0	0	0	0	0	0	0	0	0	0	0	0	0	0	0	0	0	0	0									363	0	0	0	0	0	0	0	0	0	0	0	0	0	0	0	0	0	0	0
	364	0	0	0	0	0	0	0	0	0	0	0	0	0	0	0	0	0	0	0	0									364	0	0	0	0	0	0	0	0	0	0	0	0	0	0	0	0	0	0	0
	365	0	0	0	0	0	0	0	0	0	0	0	0	0	0	0	0	0	0	0	0									365	0	0	0	0	0	0	0	0	0	0	0	0	0	0	0	0	0	0	0
	366	0	0	0	0	0	0	0	0	0	0	0	0	0	0	0	0	0	0	0	0									366	0	0	0	0	0	0	0	0	0	0	0	0	0	0	0	0	0	0	0
	367	0	0	0	0	0	0	0	0	0	0	0	0	0	0	0	0	0	0	0	0									367	0	0	0	0	0	0	0	0	0	0	0	0	0	0	0	0	0	0	0
	368	0	0	0	0	0	0	0	0	0	0	0	0	0	0	0	0	0	0	0	0									368	0	0	0	0	0	0	0	0	0	0	0	0	0	0	0	0	0	0	0
	369	0	0	0	0	0	0	0	0	0	0	0	0	0	0	0	0	0	0	0	0									369	0	0	0	0	0	0	0	0	0	0	0	0	0	0	0	0	0	0	0
	370	0	0	0	0	0	0	0	0	0	0	0	0	0	0	0	0	0	0	0	0									370	0	0	0	0	0	0	0	0	0	0	0	0	0	0	0	0	0	0	0
	371	0	0	0	0	0	0	0	0	0	0	0	0	0	0	0	0	0	0	0	0									371	0	0	0	0	0	0	0	0	0	0	0	0	0	0	0	0	0	0	0
	372	0	0	0	0	0	0	0	0	0	0	0	0	0	0	0	0	0	0	0	0									372	0	0	0	0	0	0	0	0	0	0	0	0	0	0	0	0	0	0	0
	373	0	0	0	0	0	0	0	0	0	0	0	0	0	0	0	0	0	0	0	0									373	0	0	0	0	0	0	0	0	0	0	0	0	0	0	0	0	0	0	0
	374	0	0	0	0	0	0	0	0	0	0	0	0	0	0	0	0	0	0	0	0									374	0	0	0	0	0	0	0	0	0	0	0	0	0	0	0	0	0	0	0
	375	0	0	0	0	0	0	0	0	0	0	0	0	0	0	0	0	0	0	0	0									375	0	0	0	0	0	0	0	0	0	0	0	0	0	0	0	0	0	0	0
	376	0	0	0	0	0	0	0	0	0	0	0	0	0	0	0	0	0	0	0	0									376	0	0	0	0	0	0	0	0	0	0	0	0	0	0	0	0	0	0	0
	377	0	0	0	0	0	0	0	0	0	0	0	0	0	0	0	0	0	0	0	0									377	0	0	0	0	0	0	0	0	0	0	0	0	0	0	0	0	0	0	0
	378	0	0	0	0	0	0	0	0	0	0	0	0	0	0	0	0	0	0	0	0									378	0	0	0	0	0	0	0	0	0	0	0	0	0	0	0	0	0	0	0
	379	0	0	0	0	0	0	0	0	0	0	0	0	0	0	0	0	0	0	0	0									379	0	0	0	0	0	0	0	0	0	0	0	0	0	0	0	0	0	0	0
	380	0	0	0	0	0	0	0	0	0	0	0	0	0	0	0	0	0	0	0	0									380	0	0	0	0	0	0	0	0	0	0	0	0	0	0	0	0	0	0	0
	381	0	0	0	0	0	0	0	0	0	0	0	0	0	0	0	0	0	0	0	0									381	0	0	0	0	0	0	0	0	0	0	0	0	0	0	0	0	0	0	0
	382	0	0	0	0	0	0	0	0	0	0	0	0	0	0	0	0	0	0	0	0									382	0	0	0	0	0	0	0	0	0	0	0	0	0	0	0	0	0	0	0
	383	0	0	0	0	0	0	0	0	0	0	0	0	0	0	0	0	0	0	0	0									383	0	0	0	0	0	0	0	0	0	0	0	0	0	0	0	0	0	0	0
	384	0	0	0	0	0	0	0	0	0	0	0	0	0	0	0	0	0	0	0	0									384	0	0	0	0	0	0	0	0	0	0	0	0	0	0	0	0	0	0	0
	385	0	0	0	0	0	0	0	0	0	0	0	0	0	0	0	0	0	0	0	0									385	0	0	0	0	0	0	0	0	0	0	0	0	0	0	0	0	0	0	0
	386	0	0	0	0	0	0	0	0	0	0	0	0	0	0	0	0	0	0	0	0									386	0	0	0	0	0	0	0	0	0	0	0	0	0	0	0	0	0	0	0
	387	0	0	0	0	0	0	0	0	0	0	0	0	0	0	0	0	0	0	0	0									387	0	0	0	0	0	0	0	0	0	0	0	0	0	0	0	0	0	0	0
	388	0	0	0	0	0	0	0	0	0	0	0	0	0	0	0	0	0	0	0	0									388	0	0	0	0	0	0	0	0	0	0	0	0	0	0	0	0	0	0	0
	389	0	0	0	0	0	0	0	0	0	0	0	0	0	0	0	0	0	0	0	0									389	0	0	0	0	0	0	0	0	0	0	0	0	0	0	0	0	0	0	0
	390	0	0	0	0	0	0	0	0	0	0	0	0	0	0	0	0	0	0	0	0									390	0	0	0	0	0	0	0	0	0	0	0	0	0	0	0	0	0	0	0
	391	0	0	0	0	0	0	0	0	0	0	0	0	0	0	0	0	0	0	0	0									391	0	0	0	0	0	0	0	0	0	0	0	0	0	0	0	0	0	0	0
	392	0	0	0	0	0	0	0	0	0	0	0	0	0	0	0	0	0	0	0	0									392	0	0	0	0	0	0	0	0	0	0	0	0	0	0	0	0	0	0	0
	393	0	0	0	0	0	0	0	0	0	0	0	0	0	0	0	0	0	0	0	0									393	0	0	0	0	0	0	0	0	0	0	0	0	0	0	0	0	0	0	0
	394	0	0	0	0	0	0	0	0	0	0	0	0	0	0	0	0	0	0	0	0									394	0	0	0	0	0	0	0	0	0	0	0	0	0	0	0	0	0	0	0
	395	0	0	0	0	0	0	0	0	0	0	0	0	0	0	0	0	0	0	0	0									395	0	0	0	0	0	0	0	0	0	0	0	0	0	0	0	0	0	0	0
	396	0	0	0	0	0	0	0	0	0	0	0	0	0	0	0	0	0	0	0	0									396	0	0	0	0	0	0	0	0	0	0	0	0	0	0	0	0	0	0	0
	397	0	0	0	0	0	0	0	0	0	0	0	0	0	0	0	0	0	0	0	0									397	0	0	0	0	0	0	0	0	0	0	0	0	0	0	0	0	0	0	0
	398	0	0	0	0	0	0	0	0	0	0	0	0	0	0	0	0	0	0	0	0									398	0	0	0	0	0	0	0	0	0	0	0	0	0	0	0	0	0	0	0
	399	0	0	0	0	0	0	0	0	0	0	0	0	0	0	0	0	0	0	0	0									399	0	0	0	0	0	0	0	0	0	0	0	0	0	0	0	0	0	0	0
	400	0	0	0	0	0	0	0	0	0	0	0	0	0	0	0	0	0	0	0	0									400	0	0	0	0	0	0	0	0	0	0	0	0	0	0	0	0	0	0	0
	401	0	0	0	0	0	0	0	0	0	0	0	0	0	0	0	0	0	0	0	0									401	0	0	0	0	0	0	0	0	0	0	0	0	0	0	0	0	0	0	0
	402	0	0	0	0	0	0	0	0	0	0	0	0	0	0	0	0	0	0	0	0									402	0	0	0	0	0	0	0	0	0	0	0	0	0	0	0	0	0	0	0
	403	0	0	0	0	0	0	0	0	0	0	0	0	0	0	0	0	0	0	0	0									403	0	0	0	0	0	0	0	0	0	0	0	0	0	0	0	0	0	0	0
	404	0	0	0	0	0	0	0	0	0	0	0	0	0	0	0	0	0	0	0	0									404	0	0	0	0	0	0	0	0	0	0	0	0	0	0	0	0	0	0	0
	405	0	0	0	0	0	0	0	0	0	0	0	0	0	0	0	0	0	0	0	0									405	0	0	0	0	0	0	0	0	0	0	0	0	0	0	0	0	0	0	0
	406	0	0	0	0	0	0	0	0	0	0	0	0	0	0	0	0	0	0	0	0									406	0	0	0	0	0	0	0	0	0	0	0	0	0	0	0	0	0	0	0
	407	0	0	0	0	0	0	0	0	0	0	0	0	0	0	0	0	0	0	0	0									407	0	0	0	0	0	0	0	0	0	0	0	0	0	0	0	0	0	0	0
	408	0	0	0	0	0	0	0	0	0	0	0	0	0	0	0	0	0	0	0	0									408	0	0	0	0	0	0	0	0	0	0	0	0	0	0	0	0	0	0	0
	409	0	0	0	0	0	0	0	0	0	0	0	0	0	0	0	0	0	0	0	0									409	0	0	0	0	0	0	0	0	0	0	0	0	0	0	0	0	0	0	0
	410	0	0	0	0	0	0	0	0	0	0	0	0	0	0	0	0	0	0	0	0									410	0	0	0	0	0	0	0	0	0	0	0	0	0	0	0	0	0	0	0
	411	0	0	0	0	0	0	0	0	0	0	0	0	0	0	0	0	0	0	0	0									411	0	0	0	0	0	0	0	0	0	0	0	0	0	0	0	0	0	0	0
	412	0	0	0	0	0	0	0	0	0	0	0	0	0	0	0	0	0	0	0	0									412	0	0	0	0	0	0	0	0	0	0	0	0	0	0	0	0	0	0	0
	413	0	0	0	0	0	0	0	0	0	0	0	0	0	0	0	0	0	0	0	0									413	0	0	0	0	0	0	0	0	0	0	0	0	0	0	0	0	0	0	0
	414	0	0	0	0	0	0	0	0	0	0	0	0	0	0	0	0	0	0	0	0									414	0	0	0	0	0	0	0	0	0	0	0	0	0	0	0	0	0	0	0
	415	0	0	0	0	0	0	0	0	0	0	0	0	0	0	0	0	0	0	0	0									415	0	0	0	0	0	0	0	0	0	0	0	0	0	0	0	0	0	0	0
	416	0	0	0	0	0	0	0	0	0	0	0	0	0	0	0	0	0	0	0	0									416	0	0	0	0	0	0	0	0	0	0	0	0	0	0	0	0	0	0	0
	417	0	0	0	0	0	0	0	0	0	0	0	0	0	0	0	0	0	0	0	0									417	0	0	0	0	0	0	0	0	0	0	0	0	0	0	0	0	0	0	0
	418	0	0	0	0	0	0	0	0	0	0	0	0	0	0	0	0	0	0	0	0									418	0	0	0	0	0	0	0	0	0	0	0	0	0	0	0	0	0	0	0
	419	0	0	0	0	0	0	0	0	0	0	0	0	0	0	0	0	0	0	0	0									419	0	0	0	0	0	0	0	0	0	0	0	0	0	0	0	0	0	0	0
	420	0	0	0	0	0	0	0	0	0	0	0	0	0	0	0	0	0	0	0	0									420	0	0	0	0	0	0	0	0	0	0	0	0	0	0	0	0	0	0	0
	421	0	0	0	0	0	0	0	0	0	0	0	0	0	0	0	0	0	0	0	0									421	0	0	0	0	0	0	0	0	0	0	0	0	0	0	0	0	0	0	0
	422	0	0	0	0	0	0	0	0	0	0	0	0	0	0	0	0	0	0	0	0									422	0	0	0	0	0	0	0	0	0	0	0	0	0	0	0	0	0	0	0
	423	0	0	0	0	0	0	0	0	0	0	0	0	0	0	0	0	0	0	0	0									423	0	0	0	0	0	0	0	0	0	0	0	0	0	0	0	0	0	0	0
	424	0	0	0	0	0	0	0	0	0	0	0	0	0	0	0	0	0	0	0	0									424	0	0	0	0	0	0	0	0	0	0	0	0	0	0	0	0	0	0	0
	425	0	0	0	0	0	0	0	0	0	0	0	0	0	0	0	0	0	0	0	0									425	0	0	0	0	0	0	0	0	0	0	0	0	0	0	0	0	0	0	0
	426	0	0	0	0	0	0	0	0	0	0	0	0	0	0	0	0	0	0	0	0									426	0	0	0	0	0	0	0	0	0	0	0	0	0	0	0	0	0	0	0
	427	0	0	0	0	0	0	0	0	0	0	0	0	0	0	0	0	0	0	0	0									427	0	0	0	0	0	0	0	0	0	0	0	0	0	0	0	0	0	0	0
	428	0	0	0	0	0	0	0	0	0	0	0	0	0	0	0	0	0	0	0	0									428	0	0	0	0	0	0	0	0	0	0	0	0	0	0	0	0	0	0	0
	429	0	0	0	0	0	0	0	0	0	0	0	0	0	0	0	0	0	0	0	0									429	0	0	0	0	0	0	0	0	0	0	0	0	0	0	0	0	0	0	0
	430	0	0	0	0	0	0	0	0	0	0	0	0	0	0	0	0	0	0	0	0									430	0	0	0	0	0	0	0	0	0	0	0	0	0	0	0	0	0	0	0
	431	0	0	0	0	0	0	0	0	0	0	0	0	0	0	0	0	0	0	0	0									431	0	0	0	0	0	0	0	0	0	0	0	0	0	0	0	0	0	0	0
	432	0	0	0	0	0	0	0	0	0	0	0	0	0	0	0	0	0	0	0	0									432	0	0	0	0	0	0	0	0	0	0	0	0	0	0	0	0	0	0	0
	433	0	0	0	0	0	0	0	0	0	0	0	0	0	0	0	0	0	0	0	0									433	0	0	0	0	0	0	0	0	0	0	0	0	0	0	0	0	0	0	0
	434	0	0	0	0	0	0	0	0	0	0	0	0	0	0	0	0	0	0	0	0									434	0	0	0	0	0	0	0	0	0	0	0	0	0	0	0	0	0	0	0
	435	0	0	0	0	0	0	0	0	0	0	0	0	0	0	0	0	0	0	0	0									435	0	0	0	0	0	0	0	0	0	0	0	0	0	0	0	0	0	0	0
	436	0	0	0	0	0	0	0	0	0	0	0	0	0	0	0	0	0	0	0	0									436	0	0	0	0	0	0	0	0	0	0	0	0	0	0	0	0	0	0	0
	437	0	0	0	0	0	0	0	0	0	0	0	0	0	0	0	0	0	0	0	0									437	0	0	0	0	0	0	0	0	0	0	0	0	0	0	0	0	0	0	0
	438	0	0	0	0	0	0	0	0	0	0	0	0	0	0	0	0	0	0	0	0									438	0	0	0	0	0	0	0	0	0	0	0	0	0	0	0	0	0	0	0
	439	0	0	0	0	0	0	0	0	0	0	0	0	0	0	0	0	0	0	0	0									439	0	0	0	0	0	0	0	0	0	0	0	0	0	0	0	0	0	0	0
	440	0	0	0	0	0	0	0	0	0	0	0	0	0	0	0	0	0	0	0	0									440	0	0	0	0	0	0	0	0	0	0	0	0	0	0	0	0	0	0	0
	441	0	0	0	0	0	0	0	0	0	0	0	0	0	0	0	0	0	0	0	0									441	0	0	0	0	0	0	0	0	0	0	0	0	0	0	0	0	0	0	0
	442	0	0	0	0	0	0	0	0	0	0	0	0	0	0	0	0	0	0	0	0									442	0	0	0	0	0	0	0	0	0	0	0	0	0	0	0	0	0	0	0
	443	0	0	0	0	0	0	0	0	0	0	0	0	0	0	0	0	0	0	0	0									443	0	0	0	0	0	0	0	0	0	0	0	0	0	0	0	0	0	0	0
	444	0	0	0	0	0	0	0	0	0	0	0	0	0	0	0	0	0	0	0	0									444	0	0	0	0	0	0	0	0	0	0	0	0	0	0	0	0	0	0	0
	445	0	0	0	0	0	0	0	0	0	0	0	0	0	0	0	0	0	0	0	0									445	0	0	0	0	0	0	0	0	0	0	0	0	0	0	0	0	0	0	0
	446	0	0	0	0	0	0	0	0	0	0	0	0	0	0	0	0	0	0	0	0									446	0	0	0	0	0	0	0	0	0	0	0	0	0	0	0	0	0	0	0
	447	0	0	0	0	0	0	0	0	0	0	0	0	0	0	0	0	0	0	0	0									447	0	0	0	0	0	0	0	0	0	0	0	0	0	0	0	0	0	0	0
	448	0	0	0	0	0	0	0	0	0	0	0	0	0	0	0	0	0	0	0	0									448	0	0	0	0	0	0	0	0	0	0	0	0	0	0	0	0	0	0	0
	449	0	0	0	0	0	0	0	0	0	0	0	0	0	0	0	0	0	0	0	0									449	0	0	0	0	0	0	0	0	0	0	0	0	0	0	0	0	0	0	0
	450	0	0	0	0	0	0	0	0	0	0	0	0	0	0	0	0	0	0	0	0									450	0	0	0	0	0	0	0	0	0	0	0	0	0	0	0	0	0	0	0
	451	0	0	0	0	0	0	0	0	0	0	0	0	0	0	0	0	0	0	0	0									451	0	0	0	0	0	0	0	0	0	0	0	0	0	0	0	0	0	0	0
	452	0	0	0	0	0	0	0	0	0	0	0	0	0	0	0	0	0	0	0	0									452	0	0	0	0	0	0	0	0	0	0	0	0	0	0	0	0	0	0	0
	453	0	0	0	0	0	0	0	0	0	0	0	0	0	0	0	0	0	0	0	0									453	0	0	0	0	0	0	0	0	0	0	0	0	0	0	0	0	0	0	0
	454	0	0	0	0	0	0	0	0	0	0	0	0	0	0	0	0	0	0	0	0									454	0	0	0	0	0	0	0	0	0	0	0	0	0	0	0	0	0	0	0
	455	0	0	0	0	0	0	0	0	0	0	0	0	0	0	0	0	0	0	0	0									455	0	0	0	0	0	0	0	0	0	0	0	0	0	0	0	0	0	0	0
	456	0	0	0	0	0	0	0	0	0	0	0	0	0	0	0	0	0	0	0	0									456	0	0	0	0	0	0	0	0	0	0	0	0	0	0	0	0	0	0	0
	457	0	0	0	0	0	0	0	0	0	0	0	0	0	0	0	0	0	0	0	0									457	0	0	0	0	0	0	0	0	0	0	0	0	0	0	0	0	0	0	0
	458	0	0	0	0	0	0	0	0	0	0	0	0	0	0	0	0	0	0	0	0									458	0	0	0	0	0	0	0	0	0	0	0	0	0	0	0	0	0	0	0
	459	0	0	0	0	0	0	0	0	0	0	0	0	0	0	0	0	0	0	0	0									459	0	0	0	0	0	0	0	0	0	0	0	0	0	0	0	0	0	0	0
	460	0	0	0	0	0	0	0	0	0	0	0	0	0	0	0	0	0	0	0	0									460	0	0	0	0	0	0	0	0	0	0	0	0	0	0	0	0	0	0	0
	461	0	0	0	0	0	0	0	0	0	0	0	0	0	0	0	0	0	0	0	0									461	0	0	0	0	0	0	0	0	0	0	0	0	0	0	0	0	0	0	0
	462	0	0	0	0	0	0	0	0	0	0	0	0	0	0	0	0	0	0	0	0									462	0	0	0	0	0	0	0	0	0	0	0	0	0	0	0	0	0	0	0
	463	0	0	0	0	0	0	0	0	0	0	0	0	0	0	0	0	0	0	0	0									463	0	0	0	0	0	0	0	0	0	0	0	0	0	0	0	0	0	0	0
	464	0	0	0	0	0	0	0	0	0	0	0	0	0	0	0	0	0	0	0	0									464	0	0	0	0	0	0	0	0	0	0	0	0	0	0	0	0	0	0	0
	465	0	0	0	0	0	0	0	0	0	0	0	0	0	0	0	0	0	0	0	0									465	0	0	0	0	0	0	0	0	0	0	0	0	0	0	0	0	0	0	0
	466	0	0	0	0	0	0	0	0	0	0	0	0	0	0	0	0	0	0	0	0									466	0	0	0	0	0	0	0	0	0	0	0	0	0	0	0	0	0	0	0
	467	0	0	0	0	0	0	0	0	0	0	0	0	0	0	0	0	0	0	0	0									467	0	0	0	0	0	0	0	0	0	0	0	0	0	0	0	0	0	0	0
	468	0	0	0	0	0	0	0	0	0	0	0	0	0	0	0	0	0	0	0	0									468	0	0	0	0	0	0	0	0	0	0	0	0	0	0	0	0	0	0	0
	469	0	0	0	0	0	0	0	0	0	0	0	0	0	0	0	0	0	0	0	0									469	0	0	0	0	0	0	0	0	0	0	0	0	0	0	0	0	0	0	0
	470	0	0	0	0	0	0	0	0	0	0	0	0	0	0	0	0	0	0	0	0									470	0	0	0	0	0	0	0	0	0	0	0	0	0	0	0	0	0	0	0
	471	0	0	0	0	0	0	0	0	0	0	0	0	0	0	0	0	0	0	0	0									471	0	0	0	0	0	0	0	0	0	0	0	0	0	0	0	0	0	0	0
	472	0	0	0	0	0	0	0	0	0	0	0	0	0	0	0	0	0	0	0	0									472	0	0	0	0	0	0	0	0	0	0	0	0	0	0	0	0	0	0	0
	473	0	0	0	0	0	0	0	0	0	0	0	0	0	0	0	0	0	0	0	0									473	0	0	0	0	0	0	0	0	0	0	0	0	0	0	0	0	0	0	0
	474	0	0	0	0	0	0	0	0	0	0	0	0	0	0	0	0	0	0	0	0									474	0	0	0	0	0	0	0	0	0	0	0	0	0	0	0	0	0	0	0
	475	0	0	0	0	0	0	0	0	0	0	0	0	0	0	0	0	0	0	0	0									475	0	0	0	0	0	0	0	0	0	0	0	0	0	0	0	0	0	0	0
	476	0	0	0	0	0	0	0	0	0	0	0	0	0	0	0	0	0	0	0	0									476	0	0	0	0	0	0	0	0	0	0	0	0	0	0	0	0	0	0	0
	477	0	0	0	0	0	0	0	0	0	0	0	0	0	0	0	0	0	0	0	0									477	0	0	0	0	0	0	0	0	0	0	0	0	0	0	0	0	0	0	0
	478	0	0	0	0	0	0	0	0	0	0	0	0	0	0	0	0	0	0	0	0									478	0	0	0	0	0	0	0	0	0	0	0	0	0	0	0	0	0	0	0
	479	0	0	0	0	0	0	0	0	0	0	0	0	0	0	0	0	0	0	0	0									479	0	0	0	0	0	0	0	0	0	0	0	0	0	0	0	0	0	0	0
	480	0	0	0	0	0	0	0	0	0	0	0	0	0	0	0	0	0	0	0	0									480	0	0	0	0	0	0	0	0	0	0	0	0	0	0	0	0	0	0	0
	481	0	0	0	0	0	0	0	0	0	0	0	0	0	0	0	0	0	0	0	0									481	0	0	0	0	0	0	0	0	0	0	0	0	0	0	0	0	0	0	0
	482	0	0	0	0	0	0	0	0	0	0	0	0	0	0	0	0	0	0	0	0									482	0	0	0	0	0	0	0	0	0	0	0	0	0	0	0	0	0	0	0
	483	0	0	0	0	0	0	0	0	0	0	0	0	0	0	0	0	0	0	0	0									483	0	0	0	0	0	0	0	0	0	0	0	0	0	0	0	0	0	0	0
	484	0	0	0	0	0	0	0	0	0	0	0	0	0	0	0	0	0	0	0	0									484	0	0	0	0	0	0	0	0	0	0	0	0	0	0	0	0	0	0	0
	485	0	0	0	0	0	0	0	0	0	0	0	0	0	0	0	0	0	0	0	0									485	0	0	0	0	0	0	0	0	0	0	0	0	0	0	0	0	0	0	0
	486	0	0	0	0	0	0	0	0	0	0	0	0	0	0	0	0	0	0	0	0									486	0	0	0	0	0	0	0	0	0	0	0	0	0	0	0	0	0	0	0
	487	0	0	0	0	0	0	0	0	0	0	0	0	0	0	0	0	0	0	0	0									487	0	0	0	0	0	0	0	0	0	0	0	0	0	0	0	0	0	0	0
	488	0	0	0	0	0	0	0	0	0	0	0	0	0	0	0	0	0	0	0	0									488	0	0	0	0	0	0	0	0	0	0	0	0	0	0	0	0	0	0	0
	489	0	0	0	0	0	0	0	0	0	0	0	0	0	0	0	0	0	0	0	0									489	0	0	0	0	0	0	0	0	0	0	0	0	0	0	0	0	0	0	0
	490	0	0	0	0	0	0	0	0	0	0	0	0	0	0	0	0	0	0	0	0									490	0	0	0	0	0	0	0	0	0	0	0	0	0	0	0	0	0	0	0
	491	0	0	0	0	0	0	0	0	0	0	0	0	0	0	0	0	0	0	0	0									491	0	0	0	0	0	0	0	0	0	0	0	0	0	0	0	0	0	0	0
	492	0	0	0	0	0	0	0	0	0	0	0	0	0	0	0	0	0	0	0	0									492	0	0	0	0	0	0	0	0	0	0	0	0	0	0	0	0	0	0	0
	493	0	0	0	0	0	0	0	0	0	0	0	0	0	0	0	0	0	0	0	0									493	0	0	0	0	0	0	0	0	0	0	0	0	0	0	0	0	0	0	0
	494	0	0	0	0	0	0	0	0	0	0	0	0	0	0	0	0	0	0	0	0									494	0	0	0	0	0	0	0	0	0	0	0	0	0	0	0	0	0	0	0
	495	0	0	0	0	0	0	0	0	0	0	0	0	0	0	0	0	0	0	0	0									495	0	0	0	0	0	0	0	0	0	0	0	0	0	0	0	0	0	0	0
	496	0	0	0	0	0	0	0	0	0	0	0	0	0	0	0	0	0	0	0	0									496	0	0	0	0	0	0	0	0	0	0	0	0	0	0	0	0	0	0	0
	497	0	0	0	0	0	0	0	0	0	0	0	0	0	0	0	0	0	0	0	0									497	0	0	0	0	0	0	0	0	0	0	0	0	0	0	0	0	0	0	0
	498	0	0	0	0	0	0	0	0	0	0	0	0	0	0	0	0	0	0	0	0									498	0	0	0	0	0	0	0	0	0	0	0	0	0	0	0	0	0	0	0
	499	0	0	0	0	0	0	0	0	0	0	0	0	0	0	0	0	0	0	0	0									499	0	0	0	0	0	0	0	0	0	0	0	0	0	0	0	0	0	0	0
	500	0	0	0	0	0	0	0	0	0	0	0	0	0	0	0	0	0	0	0	0									500	0	0	0	0	0	0	0	0	0	0	0	0	0	0	0	0	0	0	0
	501	0	0	0	0	0	0	0	0	0	0	0	0	0	0	0	0	0	0	0	0									501	0	0	0	0	0	0	0	0	0	0	0	0	0	0	0	0	0	0	0
	502	0	0	0	0	0	0	0	0	0	0	0	0	0	0	0	0	0	0	0	0									502	0	0	0	0	0	0	0	0	0	0	0	0	0	0	0	0	0	0	0
	503	0	0	0	0	0	0	0	0	0	0	0	0	0	0	0	0	0	0	0	0									503	0	0	0	0	0	0	0	0	0	0	0	0	0	0	0	0	0	0	0
	504	0	0	0	0	0	0	0	0	0	0	0	0	0	0	0	0	0	0	0	0									504	0	0	0	0	0	0	0	0	0	0	0	0	0	0	0	0	0	0	0
	505	0	0	0	0	0	0	0	0	0	0	0	0	0	0	0	0	0	0	0	0									505	0	0	0	0	0	0	0	0	0	0	0	0	0	0	0	0	0	0	0
	506	0	0	0	0	0	0	0	0	0	0	0	0	0	0	0	0	0	0	0	0									506	0	0	0	0	0	0	0	0	0	0	0	0	0	0	0	0	0	0	0
	507	0	0	0	0	0	0	0	0	0	0	0	0	0	0	0	0	0	0	0	0									507	0	0	0	0	0	0	0	0	0	0	0	0	0	0	0	0	0	0	0
	508	0	0	0	0	0	0	0	0	0	0	0	0	0	0	0	0	0	0	0	0									508	0	0	0	0	0	0	0	0	0	0	0	0	0	0	0	0	0	0	0
	509	0	0	0	0	0	0	0	0	0	0	0	0	0	0	0	0	0	0	0	0									509	0	0	0	0	0	0	0	0	0	0	0	0	0	0	0	0	0	0	0
	510	0	0	0	0	0	0	0	0	0	0	0	0	0	0	0	0	0	0	0	0									510	0	0	0	0	0	0	0	0	0	0	0	0	0	0	0	0	0	0	0
	511	0	0	0	0	0	0	0	0	0	0	0	0	0	0	0	0	0	0	0	0									511	0	0	0	0	0	0	0	0	0	0	0	0	0	0	0	0	0	0	0
	512	0	0	0	0	0	0	0	0	0	0	0	0	0	0	0	0	0	0	0	0									512	0	0	0	0	0	0	0	0	0	0	0	0	0	0	0	0	0	0	0
	513	0	0	0	0	0	0	0	0	0	0	0	0	0	0	0	0	0	0	0	0									513	0	0	0	0	0	0	0	0	0	0	0	0	0	0	0	0	0	0	0
	514	0	0	0	0	0	0	0	0	0	0	0	0	0	0	0	0	0	0	0	0									514	0	0	0	0	0	0	0	0	0	0	0	0	0	0	0	0	0	0	0
	515	0	0	0	0	0	0	0	0	0	0	0	0	0	0	0	0	0	0	0	0									515	0	0	0	0	0	0	0	0	0	0	0	0	0	0	0	0	0	0	0
	516	0	0	0	0	0	0	0	0	0	0	0	0	0	0	0	0	0	0	0	0									516	0	0	0	0	0	0	0	0	0	0	0	0	0	0	0	0	0	0	0
	517	0	0	0	0	0	0	0	0	0	0	0	0	0	0	0	0	0	0	0	0									517	0	0	0	0	0	0	0	0	0	0	0	0	0	0	0	0	0	0	0
	518	0	0	0	0	0	0	0	0	0	0	0	0	0	0	0	0	0	0	0	0									518	0	0	0	0	0	0	0	0	0	0	0	0	0	0	0	0	0	0	0
	519	0	0	0	0	0	0	0	0	0	0	0	0	0	0	0	0	0	0	0	0									519	0	0	0	0	0	0	0	0	0	0	0	0	0	0	0	0	0	0	0
	520	0	0	0	0	0	0	0	0	0	0	0	0	0	0	0	0	0	0	0	0									520	0	0	0	0	0	0	0	0	0	0	0	0	0	0	0	0	0	0	0
	521	0	0	0	0	0	0	0	0	0	0	0	0	0	0	0	0	0	0	0	0									521	0	0	0	0	0	0	0	0	0	0	0	0	0	0	0	0	0	0	0
	522	0	0	0	0	0	0	0	0	0	0	0	0	0	0	0	0	0	0	0	0									522	0	0	0	0	0	0	0	0	0	0	0	0	0	0	0	0	0	0	0
	523	0	0	0	0	0	0	0	0	0	0	0	0	0	0	0	0	0	0	0	0									523	0	0	0	0	0	0	0	0	0	0	0	0	0	0	0	0	0	0	0
	524	0	0	0	0	0	0	0	0	0	0	0	0	0	0	0	0	0	0	0	0									524	0	0	0	0	0	0	0	0	0	0	0	0	0	0	0	0	0	0	0
	525	0	0	0	0	0	0	0	0	0	0	0	0	0	0	0	0	0	0	0	0									525	0	0	0	0	0	0	0	0	0	0	0	0	0	0	0	0	0	0	0
	526	0	0	0	0	0	0	0	0	0	0	0	0	0	0	0	0	0	0	0	0									526	0	0	0	0	0	0	0	0	0	0	0	0	0	0	0	0	0	0	0
	527	0	0	0	0	0	0	0	0	0	0	0	0	0	0	0	0	0	0	0	0									527	0	0	0	0	0	0	0	0	0	0	0	0	0	0	0	0	0	0	0
	528	0	0	0	0	0	0	0	0	0	0	0	0	0	0	0	0	0	0	0	0									528	0	0	0	0	0	0	0	0	0	0	0	0	0	0	0	0	0	0	0
	529	0	0	0	0	0	0	0	0	0	0	0	0	0	0	0	0	0	0	0	0									529	0	0	0	0	0	0	0	0	0	0	0	0	0	0	0	0	0	0	0
	530	0	0	0	0	0	0	0	0	0	0	0	0	0	0	0	0	0	0	0	0									530	0	0	0	0	0	0	0	0	0	0	0	0	0	0	0	0	0	0	0
	531	0	0	0	0	0	0	0	0	0	0	0	0	0	0	0	0	0	0	0	0									531	0	0	0	0	0	0	0	0	0	0	0	0	0	0	0	0	0	0	0
	532	0	0	0	0	0	0	0	0	0	0	0	0	0	0	0	0	0	0	0	0									532	0	0	0	0	0	0	0	0	0	0	0	0	0	0	0	0	0	0	0
	533	0	0	0	0	0	0	0	0	0	0	0	0	0	0	0	0	0	0	0	0									533	0	0	0	0	0	0	0	0	0	0	0	0	0	0	0	0	0	0	0
	534	0	0	0	0	0	0	0	0	0	0	0	0	0	0	0	0	0	0	0	0									534	0	0	0	0	0	0	0	0	0	0	0	0	0	0	0	0	0	0	0
	535	0	0	0	0	0	0	0	0	0	0	0	0	0	0	0	0	0	0	0	0									535	0	0	0	0	0	0	0	0	0	0	0	0	0	0	0	0	0	0	0
	536	0	0	0	0	0	0	0	0	0	0	0	0	0	0	0	0	0	0	0	0									536	0	0	0	0	0	0	0	0	0	0	0	0	0	0	0	0	0	0	0
	537	0	0	0	0	0	0	0	0	0	0	0	0	0	0	0	0	0	0	0	0									537	0	0	0	0	0	0	0	0	0	0	0	0	0	0	0	0	0	0	0
	538	0	0	0	0	0	0	0	0	0	0	0	0	0	0	0	0	0	0	0	0									538	0	0	0	0	0	0	0	0	0	0	0	0	0	0	0	0	0	0	0
	539	0	0	0	0	0	0	0	0	0	0	0	0	0	0	0	0	0	0	0	0									539	0	0	0	0	0	0	0	0	0	0	0	0	0	0	0	0	0	0	0
	540	0	0	0	0	0	0	0	0	0	0	0	0	0	0	0	0	0	0	0	0									540	0	0	0	0	0	0	0	0	0	0	0	0	0	0	0	0	0	0	0
	541	0	0	0	0	0	0	0	0	0	0	0	0	0	0	0	0	0	0	0	0									541	0	0	0	0	0	0	0	0	0	0	0	0	0	0	0	0	0	0	0
	542	0	0	0	0	0	0	0	0	0	0	0	0	0	0	0	0	0	0	0	0									542	0	0	0	0	0	0	0	0	0	0	0	0	0	0	0	0	0	0	0
	543	0	0	0	0	0	0	0	0	0	0	0	0	0	0	0	0	0	0	0	0									543	0	0	0	0	0	0	0	0	0	0	0	0	0	0	0	0	0	0	0
	544	0	0	0	0	0	0	0	0	0	0	0	0	0	0	0	0	0	0	0	0									544	0	0	0	0	0	0	0	0	0	0	0	0	0	0	0	0	0	0	0
	545	0	0	0	0	0	0	0	0	0	0	0	0	0	0	0	0	0	0	0	0									545	0	0	0	0	0	0	0	0	0	0	0	0	0	0	0	0	0	0	0
	546	0	0	0	0	0	0	0	0	0	0	0	0	0	0	0	0	0	0	0	0									546	0	0	0	0	0	0	0	0	0	0	0	0	0	0	0	0	0	0	0
	547	0	0	0	0	0	0	0	0	0	0	0	0	0	0	0	0	0	0	0	0									547	0	0	0	0	0	0	0	0	0	0	0	0	0	0	0	0	0	0	0
	548	0	0	0	0	0	0	0	0	0	0	0	0	0	0	0	0	0	0	0	0									548	0	0	0	0	0	0	0	0	0	0	0	0	0	0	0	0	0	0	0
	549	0	0	0	0	0	0	0	0	0	0	0	0	0	0	0	0	0	0	0	0									549	0	0	0	0	0	0	0	0	0	0	0	0	0	0	0	0	0	0	0
	550	0	0	0	0	0	0	0	0	0	0	0	0	0	0	0	0	0	0	0	0									550	0	0	0	0	0	0	0	0	0	0	0	0	0	0	0	0	0	0	0
	551	0	0	0	0	0	0	0	0	0	0	0	0	0	0	0	0	0	0	0	0									551	0	0	0	0	0	0	0	0	0	0	0	0	0	0	0	0	0	0	0
	552	0	0	0	0	0	0	0	0	0	0	0	0	0	0	0	0	0	0	0	0									552	0	0	0	0	0	0	0	0	0	0	0	0	0	0	0	0	0	0	0
	553	0	0	0	0	0	0	0	0	0	0	0	0	0	0	0	0	0	0	0	0									553	0	0	0	0	0	0	0	0	0	0	0	0	0	0	0	0	0	0	0
	554	0	0	0	0	0	0	0	0	0	0	0	0	0	0	0	0	0	0	0	0									554	0	0	0	0	0	0	0	0	0	0	0	0	0	0	0	0	0	0	0
	555	0	0	0	0	0	0	0	0	0	0	0	0	0	0	0	0	0	0	0	0									555	0	0	0	0	0	0	0	0	0	0	0	0	0	0	0	0	0	0	0
	556	0	0	0	0	0	0	0	0	0	0	0	0	0	0	0	0	0	0	0	0									556	0	0	0	0	0	0	0	0	0	0	0	0	0	0	0	0	0	0	0
	557	0	0	0	0	0	0	0	0	0	0	0	0	0	0	0	0	0	0	0	0									557	0	0	0	0	0	0	0	0	0	0	0	0	0	0	0	0	0	0	0
	558	0	0	0	0	0	0	0	0	0	0	0	0	0	0	0	0	0	0	0	0									558	0	0	0	0	0	0	0	0	0	0	0	0	0	0	0	0	0	0	0
	559	0	0	0	0	0	0	0	0	0	0	0	0	0	0	0	0	0	0	0	0									559	0	0	0	0	0	0	0	0	0	0	0	0	0	0	0	0	0	0	0
	560	0	0	0	0	0	0	0	0	0	0	0	0	0	0	0	0	0	0	0	0									560	0	0	0	0	0	0	0	0	0	0	0	0	0	0	0	0	0	0	0
	561	0	0	0	0	0	0	0	0	0	0	0	0	0	0	0	0	0	0	0	0									561	0	0	0	0	0	0	0	0	0	0	0	0	0	0	0	0	0	0	0
	562	0	0	0	0	0	0	0	0	0	0	0	0	0	0	0	0	0	0	0	0									562	0	0	0	0	0	0	0	0	0	0	0	0	0	0	0	0	0	0	0
	563	0	0	0	0	0	0	0	0	0	0	0	0	0	0	0	0	0	0	0	0									563	0	0	0	0	0	0	0	0	0	0	0	0	0	0	0	0	0	0	0
	564	0	0	0	0	0	0	0	0	0	0	0	0	0	0	0	0	0	0	0	0									564	0	0	0	0	0	0	0	0	0	0	0	0	0	0	0	0	0	0	0
	565	0	0	0	0	0	0	0	0	0	0	0	0	0	0	0	0	0	0	0	0									565	0	0	0	0	0	0	0	0	0	0	0	0	0	0	0	0	0	0	0
	566	0	0	0	0	0	0	0	0	0	0	0	0	0	0	0	0	0	0	0	0									566	0	0	0	0	0	0	0	0	0	0	0	0	0	0	0	0	0	0	0
	567	0	0	0	0	0	0	0	0	0	0	0	0	0	0	0	0	0	0	0	0									567	0	0	0	0	0	0	0	0	0	0	0	0	0	0	0	0	0	0	0
	568	0	0	0	0	0	0	0	0	0	0	0	0	0	0	0	0	0	0	0	0									568	0	0	0	0	0	0	0	0	0	0	0	0	0	0	0	0	0	0	0
	569	0	0	0	0	0	0	0	0	0	0	0	0	0	0	0	0	0	0	0	0									569	0	0	0	0	0	0	0	0	0	0	0	0	0	0	0	0	0	0	0
	570	0	0	0	0	0	0	0	0	0	0	0	0	0	0	0	0	0	0	0	0									570	0	0	0	0	0	0	0	0	0	0	0	0	0	0	0	0	0	0	0
	571	0	0	0	0	0	0	0	0	0	0	0	0	0	0	0	0	0	0	0	0									571	0	0	0	0	0	0	0	0	0	0	0	0	0	0	0	0	0	0	0
	572	0	0	0	0	0	0	0	0	0	0	0	0	0	0	0	0	0	0	0	0									572	0	0	0	0	0	0	0	0	0	0	0	0	0	0	0	0	0	0	0
	573	0	0	0	0	0	0	0	0	0	0	0	0	0	0	0	0	0	0	0	0									573	0	0	0	0	0	0	0	0	0	0	0	0	0	0	0	0	0	0	0
	574	0	0	0	0	0	0	0	0	0	0	0	0	0	0	0	0	0	0	0	0									574	0	0	0	0	0	0	0	0	0	0	0	0	0	0	0	0	0	0	0
	575	0	0	0	0	0	0	0	0	0	0	0	0	0	0	0	0	0	0	0	0									575	0	0	0	0	0	0	0	0	0	0	0	0	0	0	0	0	0	0	0
	576	0	0	0	0	0	0	0	0	0	0	0	0	0	0	0	0	0	0	0	0									576	0	0	0	0	0	0	0	0	0	0	0	0	0	0	0	0	0	0	0
	577	0	0	0	0	0	0	0	0	0	0	0	0	0	0	0	0	0	0	0	0									577	0	0	0	0	0	0	0	0	0	0	0	0	0	0	0	0	0	0	0
	578	0	0	0	0	0	0	0	0	0	0	0	0	0	0	0	0	0	0	0	0									578	0	0	0	0	0	0	0	0	0	0	0	0	0	0	0	0	0	0	0
	579	0	0	0	0	0	0	0	0	0	0	0	0	0	0	0	0	0	0	0	0									579	0	0	0	0	0	0	0	0	0	0	0	0	0	0	0	0	0	0	0
	580	0	0	0	0	0	0	0	0	0	0	0	0	0	0	0	0	0	0	0	0									580	0	0	0	0	0	0	0	0	0	0	0	0	0	0	0	0	0	0	0
	581	0	0	0	0	0	0	0	0	0	0	0	0	0	0	0	0	0	0	0	0									581	0	0	0	0	0	0	0	0	0	0	0	0	0	0	0	0	0	0	0
	582	0	0	0	0	0	0	0	0	0	0	0	0	0	0	0	0	0	0	0	0									582	0	0	0	0	0	0	0	0	0	0	0	0	0	0	0	0	0	0	0
	583	0	0	0	0	0	0	0	0	0	0	0	0	0	0	0	0	0	0	0	0									583	0	0	0	0	0	0	0	0	0	0	0	0	0	0	0	0	0	0	0
	584	0	0	0	0	0	0	0	0	0	0	0	0	0	0	0	0	0	0	0	0									584	0	0	0	0	0	0	0	0	0	0	0	0	0	0	0	0	0	0	0
	585	0	0	0	0	0	0	0	0	0	0	0	0	0	0	0	0	0	0	0	0									585	0	0	0	0	0	0	0	0	0	0	0	0	0	0	0	0	0	0	0
	586	0	0	0	0	0	0	0	0	0	0	0	0	0	0	0	0	0	0	0	0									586	0	0	0	0	0	0	0	0	0	0	0	0	0	0	0	0	0	0	0
	587	0	0	0	0	0	0	0	0	0	0	0	0	0	0	0	0	0	0	0	0									587	0	0	0	0	0	0	0	0	0	0	0	0	0	0	0	0	0	0	0
	588	0	0	0	0	0	0	0	0	0	0	0	0	0	0	0	0	0	0	0	0									588	0	0	0	0	0	0	0	0	0	0	0	0	0	0	0	0	0	0	0
	589	0	0	0	0	0	0	0	0	0	0	0	0	0	0	0	0	0	0	0	0									589	0	0	0	0	0	0	0	0	0	0	0	0	0	0	0	0	0	0	0
	590	0	0	0	0	0	0	0	0	0	0	0	0	0	0	0	0	0	0	0	0									590	0	0	0	0	0	0	0	0	0	0	0	0	0	0	0	0	0	0	0
	591	0	0	0	0	0	0	0	0	0	0	0	0	0	0	0	0	0	0	0	0									591	0	0	0	0	0	0	0	0	0	0	0	0	0	0	0	0	0	0	0
	592	0	0	0	0	0	0	0	0	0	0	0	0	0	0	0	0	0	0	0	0									592	0	0	0	0	0	0	0	0	0	0	0	0	0	0	0	0	0	0	0
	593	0	0	0	0	0	0	0	0	0	0	0	0	0	0	0	0	0	0	0	0									593	0	0	0	0	0	0	0	0	0	0	0	0	0	0	0	0	0	0	0
	594	0	0	0	0	0	0	0	0	0	0	0	0	0	0	0	0	0	0	0	0									594	0	0	0	0	0	0	0	0	0	0	0	0	0	0	0	0	0	0	0
	595	0	0	0	0	0	0	0	0	0	0	0	0	0	0	0	0	0	0	0	0									595	0	0	0	0	0	0	0	0	0	0	0	0	0	0	0	0	0	0	0
	596	0	0	0	0	0	0	0	0	0	0	0	0	0	0	0	0	0	0	0	0									596	0	0	0	0	0	0	0	0	0	0	0	0	0	0	0	0	0	0	0
	597	0	0	0	0	0	0	0	0	0	0	0	0	0	0	0	0	0	0	0	0									597	0	0	0	0	0	0	0	0	0	0	0	0	0	0	0	0	0	0	0
	598	0	0	0	0	0	0	0	0	0	0	0	0	0	0	0	0	0	0	0	0									598	0	0	0	0	0	0	0	0	0	0	0	0	0	0	0	0	0	0	0
	599	0	0	0	0	0	0	0	0	0	0	0	0	0	0	0	0	0	0	0	0									599	0	0	0	0	0	0	0	0	0	0	0	0	0	0	0	0	0	0	0
	600	0	0	0	0	0	0	0	0	0	0	0	0	0	0	0	0	0	0	0	0									600	0	0	0	0	0	0	0	0	0	0	0	0	0	0	0	0	0	0	0
	601	0	0	0	0	0	0	0	0	0	0	0	0	0	0	0	0	0	0	0	0									601	0	0	0	0	0	0	0	0	0	0	0	0	0	0	0	0	0	0	0
	602	0	0	0	0	0	0	0	0	0	0	0	0	0	0	0	0	0	0	0	0									602	0	0	0	0	0	0	0	0	0	0	0	0	0	0	0	0	0	0	0
	603	0	0	0	0	0	0	0	0	0	0	0	0	0	0	0	0	0	0	0	0									603	0	0	0	0	0	0	0	0	0	0	0	0	0	0	0	0	0	0	0
	604	0	0	0	0	0	0	0	0	0	0	0	0	0	0	0	0	0	0	0	0									604	0	0	0	0	0	0	0	0	0	0	0	0	0	0	0	0	0	0	0
	605	0	0	0	0	0	0	0	0	0	0	0	0	0	0	0	0	0	0	0	0									605	0	0	0	0	0	0	0	0	0	0	0	0	0	0	0	0	0	0	0
	606	0	0	0	0	0	0	0	0	0	0	0	0	0	0	0	0	0	0	0	0									606	0	0	0	0	0	0	0	0	0	0	0	0	0	0	0	0	0	0	0
	607	0	0	0	0	0	0	0	0	0	0	0	0	0	0	0	0	0	0	0	0									607	0	0	0	0	0	0	0	0	0	0	0	0	0	0	0	0	0	0	0
	608	0	0	0	0	0	0	0	0	0	0	0	0	0	0	0	0	0	0	0	0									608	0	0	0	0	0	0	0	0	0	0	0	0	0	0	0	0	0	0	0
	609	0	0	0	0	0	0	0	0	0	0	0	0	0	0	0	0	0	0	0	0									609	0	0	0	0	0	0	0	0	0	0	0	0	0	0	0	0	0	0	0
	610	0	0	0	0	0	0	0	0	0	0	0	0	0	0	0	0	0	0	0	0									610	0	0	0	0	0	0	0	0	0	0	0	0	0	0	0	0	0	0	0
	611	0	0	0	0	0	0	0	0	0	0	0	0	0	0	0	0	0	0	0	0									611	0	0	0	0	0	0	0	0	0	0	0	0	0	0	0	0	0	0	0
	612	0	0	0	0	0	0	0	0	0	0	0	0	0	0	0	0	0	0	0	0									612	0	0	0	0	0	0	0	0	0	0	0	0	0	0	0	0	0	0	0
	613	0	0	0	0	0	0	0	0	0	0	0	0	0	0	0	0	0	0	0	0									613	0	0	0	0	0	0	0	0	0	0	0	0	0	0	0	0	0	0	0
	614	0	0	0	0	0	0	0	0	0	0	0	0	0	0	0	0	0	0	0	0									614	0	0	0	0	0	0	0	0	0	0	0	0	0	0	0	0	0	0	0
	615	0	0	0	0	0	0	0	0	0	0	0	0	0	0	0	0	0	0	0	0									615	0	0	0	0	0	0	0	0	0	0	0	0	0	0	0	0	0	0	0
	616	0	0	0	0	0	0	0	0	0	0	0	0	0	0	0	0	0	0	0	0									616	0	0	0	0	0	0	0	0	0	0	0	0	0	0	0	0	0	0	0
	617	0	0	0	0	0	0	0	0	0	0	0	0	0	0	0	0	0	0	0	0									617	0	0	0	0	0	0	0	0	0	0	0	0	0	0	0	0	0	0	0
	618	0	0	0	0	0	0	0	0	0	0	0	0	0	0	0	0	0	0	0	0									618	0	0	0	0	0	0	0	0	0	0	0	0	0	0	0	0	0	0	0
	619	0	0	0	0	0	0	0	0	0	0	0	0	0	0	0	0	0	0	0	0									619	0	0	0	0	0	0	0	0	0	0	0	0	0	0	0	0	0	0	0
	620	0	0	0	0	0	0	0	0	0	0	0	0	0	0	0	0	0	0	0	0									620	0	0	0	0	0	0	0	0	0	0	0	0	0	0	0	0	0	0	0
	621	0	0	0	0	0	0	0	0	0	0	0	0	0	0	0	0	0	0	0	0									621	0	0	0	0	0	0	0	0	0	0	0	0	0	0	0	0	0	0	0
	622	0	0	0	0	0	0	0	0	0	0	0	0	0	0	0	0	0	0	0	0									622	0	0	0	0	0	0	0	0	0	0	0	0	0	0	0	0	0	0	0
	623	0	0	0	0	0	0	0	0	0	0	0	0	0	0	0	0	0	0	0	0									623	0	0	0	0	0	0	0	0	0	0	0	0	0	0	0	0	0	0	0
	624	0	0	0	0	0	0	0	0	0	0	0	0	0	0	0	0	0	0	0	0									624	0	0	0	0	0	0	0	0	0	0	0	0	0	0	0	0	0	0	0
	625	0	0	0	0	0	0	0	0	0	0	0	0	0	0	0	0	0	0	0	0									625	0	0	0	0	0	0	0	0	0	0	0	0	0	0	0	0	0	0	0
	626	0	0	0	0	0	0	0	0	0	0	0	0	0	0	0	0	0	0	0	0									626	0	0	0	0	0	0	0	0	0	0	0	0	0	0	0	0	0	0	0
	627	0	0	0	0	0	0	0	0	0	0	0	0	0	0	0	0	0	0	0	0									627	0	0	0	0	0	0	0	0	0	0	0	0	0	0	0	0	0	0	0
	628	0	0	0	0	0	0	0	0	0	0	0	0	0	0	0	0	0	0	0	0									628	0	0	0	0	0	0	0	0	0	0	0	0	0	0	0	0	0	0	0
	629	0	0	0	0	0	0	0	0	0	0	0	0	0	0	0	0	0	0	0	0									629	0	0	0	0	0	0	0	0	0	0	0	0	0	0	0	0	0	0	0
	630	0	0	0	0	0	0	0	0	0	0	0	0	0	0	0	0	0	0	0	0									630	0	0	0	0	0	0	0	0	0	0	0	0	0	0	0	0	0	0	0
	631	0	0	0	0	0	0	0	0	0	0	0	0	0	0	0	0	0	0	0	0									631	0	0	0	0	0	0	0	0	0	0	0	0	0	0	0	0	0	0	0
	632	0	0	0	0	0	0	0	0	0	0	0	0	0	0	0	0	0	0	0	0									632	0	0	0	0	0	0	0	0	0	0	0	0	0	0	0	0	0	0	0
	633	0	0	0	0	0	0	0	0	0	0	0	0	0	0	0	0	0	0	0	0									633	0	0	0	0	0	0	0	0	0	0	0	0	0	0	0	0	0	0	0
	634	0	0	0	0	0	0	0	0	0	0	0	0	0	0	0	0	0	0	0	0									634	0	0	0	0	0	0	0	0	0	0	0	0	0	0	0	0	0	0	0
	635	0	0	0	0	0	0	0	0	0	0	0	0	0	0	0	0	0	0	0	0									635	0	0	0	0	0	0	0	0	0	0	0	0	0	0	0	0	0	0	0
	636	0	0	0	0	0	0	0	0	0	0	0	0	0	0	0	0	0	0	0	0									636	0	0	0	0	0	0	0	0	0	0	0	0	0	0	0	0	0	0	0
	637	0	0	0	0	0	0	0	0	0	0	0	0	0	0	0	0	0	0	0	0									637	0	0	0	0	0	0	0	0	0	0	0	0	0	0	0	0	0	0	0
	638	0	0	0	0	0	0	0	0	0	0	0	0	0	0	0	0	0	0	0	0									638	0	0	0	0	0	0	0	0	0	0	0	0	0	0	0	0	0	0	0
	639	0	0	0	0	0	0	0	0	0	0	0	0	0	0	0	0	0	0	0	0									639	0	0	0	0	0	0	0	0	0	0	0	0	0	0	0	0	0	0	0
	640	0	0	0	0	0	0	0	0	0	0	0	0	0	0	0	0	0	0	0	0									640	0	0	0	0	0	0	0	0	0	0	0	0	0	0	0	0	0	0	0
	641	0	0	0	0	0	0	0	0	0	0	0	0	0	0	0	0	0	0	0	0									641	0	0	0	0	0	0	0	0	0	0	0	0	0	0	0	0	0	0	0
	642	0	0	0	0	0	0	0	0	0	0	0	0	0	0	0	0	0	0	0	0									642	0	0	0	0	0	0	0	0	0	0	0	0	0	0	0	0	0	0	0
	643	0	0	0	0	0	0	0	0	0	0	0	0	0	0	0	0	0	0	0	0									643	0	0	0	0	0	0	0	0	0	0	0	0	0	0	0	0	0	0	0
	644	0	0	0	0	0	0	0	0	0	0	0	0	0	0	0	0	0	0	0	0									644	0	0	0	0	0	0	0	0	0	0	0	0	0	0	0	0	0	0	0
	645	0	0	0	0	0	0	0	0	0	0	0	0	0	0	0	0	0	0	0	0									645	0	0	0	0	0	0	0	0	0	0	0	0	0	0	0	0	0	0	0
	646	0	0	0	0	0	0	0	0	0	0	0	0	0	0	0	0	0	0	0	0									646	0	0	0	0	0	0	0	0	0	0	0	0	0	0	0	0	0	0	0
	647	0	0	0	0	0	0	0	0	0	0	0	0	0	0	0	0	0	0	0	0									647	0	0	0	0	0	0	0	0	0	0	0	0	0	0	0	0	0	0	0
	648	0	0	0	0	0	0	0	0	0	0	0	0	0	0	0	0	0	0	0	0									648	0	0	0	0	0	0	0	0	0	0	0	0	0	0	0	0	0	0	0
	649	0	0	0	0	0	0	0	0	0	0	0	0	0	0	0	0	0	0	0	0									649	0	0	0	0	0	0	0	0	0	0	0	0	0	0	0	0	0	0	0
	650	0	0	0	0	0	0	0	0	0	0	0	0	0	0	0	0	0	0	0	0									650	0	0	0	0	0	0	0	0	0	0	0	0	0	0	0	0	0	0	0
	651	0	0	0	0	0	0	0	0	0	0	0	0	0	0	0	0	0	0	0	0									651	0	0	0	0	0	0	0	0	0	0	0	0	0	0	0	0	0	0	0
	652	0	0	0	0	0	0	0	0	0	0	0	0	0	0	0	0	0	0	0	0									652	0	0	0	0	0	0	0	0	0	0	0	0	0	0	0	0	0	0	0
	653	0	0	0	0	0	0	0	0	0	0	0	0	0	0	0	0	0	0	0	0									653	0	0	0	0	0	0	0	0	0	0	0	0	0	0	0	0	0	0	0
	654	0	0	0	0	0	0	0	0	0	0	0	0	0	0	0	0	0	0	0	0									654	0	0	0	0	0	0	0	0	0	0	0	0	0	0	0	0	0	0	0
	655	0	0	0	0	0	0	0	0	0	0	0	0	0	0	0	0	0	0	0	0									655	0	0	0	0	0	0	0	0	0	0	0	0	0	0	0	0	0	0	0
	656	0	0	0	0	0	0	0	0	0	0	0	0	0	0	0	0	0	0	0	0									656	0	0	0	0	0	0	0	0	0	0	0	0	0	0	0	0	0	0	0
	657	0	0	0	0	0	0	0	0	0	0	0	0	0	0	0	0	0	0	0	0									657	0	0	0	0	0	0	0	0	0	0	0	0	0	0	0	0	0	0	0
	658	0	0	0	0	0	0	0	0	0	0	0	0	0	0	0	0	0	0	0	0									658	0	0	0	0	0	0	0	0	0	0	0	0	0	0	0	0	0	0	0
	659	0	0	0	0	0	0	0	0	0	0	0	0	0	0	0	0	0	0	0	0									659	0	0	0	0	0	0	0	0	0	0	0	0	0	0	0	0	0	0	0
	660	0	0	0	0	0	0	0	0	0	0	0	0	0	0	0	0	0	0	0	0									660	0	0	0	0	0	0	0	0	0	0	0	0	0	0	0	0	0	0	0
	661	0	0	0	0	0	0	0	0	0	0	0	0	0	0	0	0	0	0	0	0									661	0	0	0	0	0	0	0	0	0	0	0	0	0	0	0	0	0	0	0
	662	0	0	0	0	0	0	0	0	0	0	0	0	0	0	0	0	0	0	0	0									662	0	0	0	0	0	0	0	0	0	0	0	0	0	0	0	0	0	0	0
	663	0	0	0	0	0	0	0	0	0	0	0	0	0	0	0	0	0	0	0	0									663	0	0	0	0	0	0	0	0	0	0	0	0	0	0	0	0	0	0	0
	664	0	0	0	0	0	0	0	0	0	0	0	0	0	0	0	0	0	0	0	0									664	0	0	0	0	0	0	0	0	0	0	0	0	0	0	0	0	0	0	0
	665	0	0	0	0	0	0	0	0	0	0	0	0	0	0	0	0	0	0	0	0									665	0	0	0	0	0	0	0	0	0	0	0	0	0	0	0	0	0	0	0
	666	0	0	0	0	0	0	0	0	0	0	0	0	0	0	0	0	0	0	0	0									666	0	0	0	0	0	0	0	0	0	0	0	0	0	0	0	0	0	0	0
	667	0	0	0	0	0	0	0	0	0	0	0	0	0	0	0	0	0	0	0	0									667	0	0	0	0	0	0	0	0	0	0	0	0	0	0	0	0	0	0	0
	668	0	0	0	0	0	0	0	0	0	0	0	0	0	0	0	0	0	0	0	0									668	0	0	0	0	0	0	0	0	0	0	0	0	0	0	0	0	0	0	0
	669	0	0	0	0	0	0	0	0	0	0	0	0	0	0	0	0	0	0	0	0									669	0	0	0	0	0	0	0	0	0	0	0	0	0	0	0	0	0	0	0
	670	0	0	0	0	0	0	0	0	0	0	0	0	0	0	0	0	0	0	0	0									670	0	0	0	0	0	0	0	0	0	0	0	0	0	0	0	0	0	0	0
	671	0	0	0	0	0	0	0	0	0	0	0	0	0	0	0	0	0	0	0	0									671	0	0	0	0	0	0	0	0	0	0	0	0	0	0	0	0	0	0	0
	672	0	0	0	0	0	0	0	0	0	0	0	0	0	0	0	0	0	0	0	0									672	0	0	0	0	0	0	0	0	0	0	0	0	0	0	0	0	0	0	0
	673	0	0	0	0	0	0	0	0	0	0	0	0	0	0	0	0	0	0	0	0									673	0	0	0	0	0	0	0	0	0	0	0	0	0	0	0	0	0	0	0
	674	0	0	0	0	0	0	0	0	0	0	0	0	0	0	0	0	0	0	0	0									674	0	0	0	0	0	0	0	0	0	0	0	0	0	0	0	0	0	0	0
	675	0	0	0	0	0	0	0	0	0	0	0	0	0	0	0	0	0	0	0	0									675	0	0	0	0	0	0	0	0	0	0	0	0	0	0	0	0	0	0	0
	676	0	0	0	0	0	0	0	0	0	0	0	0	0	0	0	0	0	0	0	0									676	0	0	0	0	0	0	0	0	0	0	0	0	0	0	0	0	0	0	0
	677	0	0	0	0	0	0	0	0	0	0	0	0	0	0	0	0	0	0	0	0									677	0	0	0	0	0	0	0	0	0	0	0	0	0	0	0	0	0	0	0
	678	0	0	0	0	0	0	0	0	0	0	0	0	0	0	0	0	0	0	0	0									678	0	0	0	0	0	0	0	0	0	0	0	0	0	0	0	0	0	0	0
	679	0	0	0	0	0	0	0	0	0	0	0	0	0	0	0	0	0	0	0	0									679	0	0	0	0	0	0	0	0	0	0	0	0	0	0	0	0	0	0	0
	680	0	0	0	0	0	0	0	0	0	0	0	0	0	0	0	0	0	0	0	0									680	0	0	0	0	0	0	0	0	0	0	0	0	0	0	0	0	0	0	0
	681	0	0	0	0	0	0	0	0	0	0	0	0	0	0	0	0	0	0	0	0									681	0	0	0	0	0	0	0	0	0	0	0	0	0	0	0	0	0	0	0
	682	0	0	0	0	0	0	0	0	0	0	0	0	0	0	0	0	0	0	0	0									682	0	0	0	0	0	0	0	0	0	0	0	0	0	0	0	0	0	0	0
	683	0	0	0	0	0	0	0	0	0	0	0	0	0	0	0	0	0	0	0	0									683	0	0	0	0	0	0	0	0	0	0	0	0	0	0	0	0	0	0	0
	684	0	0	0	0	0	0	0	0	0	0	0	0	0	0	0	0	0	0	0	0									684	0	0	0	0	0	0	0	0	0	0	0	0	0	0	0	0	0	0	0
	685	0	0	0	0	0	0	0	0	0	0	0	0	0	0	0	0	0	0	0	0									685	0	0	0	0	0	0	0	0	0	0	0	0	0	0	0	0	0	0	0
	686	0	0	0	0	0	0	0	0	0	0	0	0	0	0	0	0	0	0	0	0									686	0	0	0	0	0	0	0	0	0	0	0	0	0	0	0	0	0	0	0
	687	0	0	0	0	0	0	0	0	0	0	0	0	0	0	0	0	0	0	0	0									687	0	0	0	0	0	0	0	0	0	0	0	0	0	0	0	0	0	0	0
	688	0	0	0	0	0	0	0	0	0	0	0	0	0	0	0	0	0	0	0	0									688	0	0	0	0	0	0	0	0	0	0	0	0	0	0	0	0	0	0	0
	689	0	0	0	0	0	0	0	0	0	0	0	0	0	0	0	0	0	0	0	0									689	0	0	0	0	0	0	0	0	0	0	0	0	0	0	0	0	0	0	0
	690	0	0	0	0	0	0	0	0	0	0	0	0	0	0	0	0	0	0	0	0									690	0	0	0	0	0	0	0	0	0	0	0	0	0	0	0	0	0	0	0
	691	0	0	0	0	0	0	0	0	0	0	0	0	0	0	0	0	0	0	0	0									691	0	0	0	0	0	0	0	0	0	0	0	0	0	0	0	0	0	0	0
	692	0	0	0	0	0	0	0	0	0	0	0	0	0	0	0	0	0	0	0	0									692	0	0	0	0	0	0	0	0	0	0	0	0	0	0	0	0	0	0	0
	693	0	0	0	0	0	0	0	0	0	0	0	0	0	0	0	0	0	0	0	0									693	0	0	0	0	0	0	0	0	0	0	0	0	0	0	0	0	0	0	0
	694	0	0	0	0	0	0	0	0	0	0	0	0	0	0	0	0	0	0	0	0									694	0	0	0	0	0	0	0	0	0	0	0	0	0	0	0	0	0	0	0
	695	0	0	0	0	0	0	0	0	0	0	0	0	0	0	0	0	0	0	0	0									695	0	0	0	0	0	0	0	0	0	0	0	0	0	0	0	0	0	0	0
	696	0	0	0	0	0	0	0	0	0	0	0	0	0	0	0	0	0	0	0	0									696	0	0	0	0	0	0	0	0	0	0	0	0	0	0	0	0	0	0	0
	697	0	0	0	0	0	0	0	0	0	0	0	0	0	0	0	0	0	0	0	0									697	0	0	0	0	0	0	0	0	0	0	0	0	0	0	0	0	0	0	0
	698	0	0	0	0	0	0	0	0	0	0	0	0	0	0	0	0	0	0	0	0									698	0	0	0	0	0	0	0	0	0	0	0	0	0	0	0	0	0	0	0
	699	0	0	0	0	0	0	0	0	0	0	0	0	0	0	0	0	0	0	0	0									699	0	0	0	0	0	0	0	0	0	0	0	0	0	0	0	0	0	0	0
	700	0	0	0	0	0	0	0	0	0	0	0	0	0	0	0	0	0	0	0	0									700	0	0	0	0	0	0	0	0	0	0	0	0	0	0	0	0	0	0	0
	701	0	0	0	0	0	0	0	0	0	0	0	0	0	0	0	0	0	0	0	0									701	0	0	0	0	0	0	0	0	0	0	0	0	0	0	0	0	0	0	0
	702	0	0	0	0	0	0	0	0	0	0	0	0	0	0	0	0	0	0	0	0									702	0	0	0	0	0	0	0	0	0	0	0	0	0	0	0	0	0	0	0
	703	0	0	0	0	0	0	0	0	0	0	0	0	0	0	0	0	0	0	0	0									703	0	0	0	0	0	0	0	0	0	0	0	0	0	0	0	0	0	0	0
	704	0	0	0	0	0	0	0	0	0	0	0	0	0	0	0	0	0	0	0	0									704	0	0	0	0	0	0	0	0	0	0	0	0	0	0	0	0	0	0	0
	705	0	0	0	0	0	0	0	0	0	0	0	0	0	0	0	0	0	0	0	0									705	0	0	0	0	0	0	0	0	0	0	0	0	0	0	0	0	0	0	0
	706	0	0	0	0	0	0	0	0	0	0	0	0	0	0	0	0	0	0	0	0									706	0	0	0	0	0	0	0	0	0	0	0	0	0	0	0	0	0	0	0
	707	0	0	0	0	0	0	0	0	0	0	0	0	0	0	0	0	0	0	0	0									707	0	0	0	0	0	0	0	0	0	0	0	0	0	0	0	0	0	0	0
	708	0	0	0	0	0	0	0	0	0	0	0	0	0	0	0	0	0	0	0	0									708	0	0	0	0	0	0	0	0	0	0	0	0	0	0	0	0	0	0	0
	709	0	0	0	0	0	0	0	0	0	0	0	0	0	0	0	0	0	0	0	0									709	0	0	0	0	0	0	0	0	0	0	0	0	0	0	0	0	0	0	0
	710	0	0	0	0	0	0	0	0	0	0	0	0	0	0	0	0	0	0	0	0									710	0	0	0	0	0	0	0	0	0	0	0	0	0	0	0	0	0	0	0
	711	0	0	0	0	0	0	0	0	0	0	0	0	0	0	0	0	0	0	0	0									711	0	0	0	0	0	0	0	0	0	0	0	0	0	0	0	0	0	0	0
	712	0	0	0	0	0	0	0	0	0	0	0	0	0	0	0	0	0	0	0	0									712	0	0	0	0	0	0	0	0	0	0	0	0	0	0	0	0	0	0	0
	713	0	0	0	0	0	0	0	0	0	0	0	0	0	0	0	0	0	0	0	0									713	0	0	0	0	0	0	0	0	0	0	0	0	0	0	0	0	0	0	0
	714	0	0	0	0	0	0	0	0	0	0	0	0	0	0	0	0	0	0	0	0									714	0	0	0	0	0	0	0	0	0	0	0	0	0	0	0	0	0	0	0
	715	0	0	0	0	0	0	0	0	0	0	0	0	0	0	0	0	0	0	0	0									715	0	0	0	0	0	0	0	0	0	0	0	0	0	0	0	0	0	0	0
	716	0	0	0	0	0	0	0	0	0	0	0	0	0	0	0	0	0	0	0	0									716	0	0	0	0	0	0	0	0	0	0	0	0	0	0	0	0	0	0	0
	717	0	0	0	0	0	0	0	0	0	0	0	0	0	0	0	0	0	0	0	0									717	0	0	0	0	0	0	0	0	0	0	0	0	0	0	0	0	0	0	0
	718	0	0	0	0	0	0	0	0	0	0	0	0	0	0	0	0	0	0	0	0									718	0	0	0	0	0	0	0	0	0	0	0	0	0	0	0	0	0	0	0
	719	0	0	0	0	0	0	0	0	0	0	0	0	0	0	0	0	0	0	0	0									719	0	0	0	0	0	0	0	0	0	0	0	0	0	0	0	0	0	0	0
	720	0	0	0	0	0	0	0	0	0	0	0	0	0	0	0	0	0	0	0	0									720	0	0	0	0	0	0	0	0	0	0	0	0	0	0	0	0	0	0	0
	721	0	0	0	0	0	0	0	0	0	0	0	0	0	0	0	0	0	0	0	0									721	0	0	0	0	0	0	0	0	0	0	0	0	0	0	0	0	0	0	0
	722	0	0	0	0	0	0	0	0	0	0	0	0	0	0	0	0	0	0	0	0									722	0	0	0	0	0	0	0	0	0	0	0	0	0	0	0	0	0	0	0
	723	0	0	0	0	0	0	0	0	0	0	0	0	0	0	0	0	0	0	0	0									723	0	0	0	0	0	0	0	0	0	0	0	0	0	0	0	0	0	0	0
	724	0	0	0	0	0	0	0	0	0	0	0	0	0	0	0	0	0	0	0	0									724	0	0	0	0	0	0	0	0	0	0	0	0	0	0	0	0	0	0	0
	725	0	0	0	0	0	0	0	0	0	0	0	0	0	0	0	0	0	0	0	0									725	0	0	0	0	0	0	0	0	0	0	0	0	0	0	0	0	0	0	0
	726	0	0	0	0	0	0	0	0	0	0	0	0	0	0	0	0	0	0	0	0									726	0	0	0	0	0	0	0	0	0	0	0	0	0	0	0	0	0	0	0
	727	0	0	0	0	0	0	0	0	0	0	0	0	0	0	0	0	0	0	0	0									727	0	0	0	0	0	0	0	0	0	0	0	0	0	0	0	0	0	0	0
	728	0	0	0	0	0	0	0	0	0	0	0	0	0	0	0	0	0	0	0	0									728	0	0	0	0	0	0	0	0	0	0	0	0	0	0	0	0	0	0	0
	729	0	0	0	0	0	0	0	0	0	0	0	0	0	0	0	0	0	0	0	0									729	0	0	0	0	0	0	0	0	0	0	0	0	0	0	0	0	0	0	0
	730	0	0	0	0	0	0	0	0	0	0	0	0	0	0	0	0	0	0	0	0									730	0	0	0	0	0	0	0	0	0	0	0	0	0	0	0	0	0	0	0
	731	0	0	0	0	0	0	0	0	0	0	0	0	0	0	0	0	0	0	0	0									731	0	0	0	0	0	0	0	0	0	0	0	0	0	0	0	0	0	0	0
	732	0	0	0	0	0	0	0	0	0	0	0	0	0	0	0	0	0	0	0	0									732	0	0	0	0	0	0	0	0	0	0	0	0	0	0	0	0	0	0	0
	733	0	0	0	0	0	0	0	0	0	0	0	0	0	0	0	0	0	0	0	0									733	0	0	0	0	0	0	0	0	0	0	0	0	0	0	0	0	0	0	0
	734	0	0	0	0	0	0	0	0	0	0	0	0	0	0	0	0	0	0	0	0									734	0	0	0	0	0	0	0	0	0	0	0	0	0	0	0	0	0	0	0
	735	0	0	0	0	0	0	0	0	0	0	0	0	0	0	0	0	0	0	0	0									735	0	0	0	0	0	0	0	0	0	0	0	0	0	0	0	0	0	0	0
	736	0	0	0	0	0	0	0	0	0	0	0	0	0	0	0	0	0	0	0	0									736	0	0	0	0	0	0	0	0	0	0	0	0	0	0	0	0	0	0	0
	737	0	0	0	0	0	0	0	0	0	0	0	0	0	0	0	0	0	0	0	0									737	0	0	0	0	0	0	0	0	0	0	0	0	0	0	0	0	0	0	0
	738	0	0	0	0	0	0	0	0	0	0	0	0	0	0	0	0	0	0	0	0									738	0	0	0	0	0	0	0	0	0	0	0	0	0	0	0	0	0	0	0
	739	0	0	0	0	0	0	0	0	0	0	0	0	0	0	0	0	0	0	0	0									739	0	0	0	0	0	0	0	0	0	0	0	0	0	0	0	0	0	0	0
	740	0	0	0	0	0	0	0	0	0	0	0	0	0	0	0	0	0	0	0	0									740	0	0	0	0	0	0	0	0	0	0	0	0	0	0	0	0	0	0	0
	741	0	0	0	0	0	0	0	0	0	0	0	0	0	0	0	0	0	0	0	0									741	0	0	0	0	0	0	0	0	0	0	0	0	0	0	0	0	0	0	0
	742	0	0	0	0	0	0	0	0	0	0	0	0	0	0	0	0	0	0	0	0									742	0	0	0	0	0	0	0	0	0	0	0	0	0	0	0	0	0	0	0
	743	0	0	0	0	0	0	0	0	0	0	0	0	0	0	0	0	0	0	0	0									743	0	0	0	0	0	0	0	0	0	0	0	0	0	0	0	0	0	0	0
	744	0	0	0	0	0	0	0	0	0	0	0	0	0	0	0	0	0	0	0	0									744	0	0	0	0	0	0	0	0	0	0	0	0	0	0	0	0	0	0	0
	745	0	0	0	0	0	0	0	0	0	0	0	0	0	0	0	0	0	0	0	0									745	0	0	0	0	0	0	0	0	0	0	0	0	0	0	0	0	0	0	0
	746	0	0	0	0	0	0	0	0	0	0	0	0	0	0	0	0	0	0	0	0									746	0	0	0	0	0	0	0	0	0	0	0	0	0	0	0	0	0	0	0
	747	0	0	0	0	0	0	0	0	0	0	0	0	0	0	0	0	0	0	0	0									747	0	0	0	0	0	0	0	0	0	0	0	0	0	0	0	0	0	0	0
	748	0	0	0	0	0	0	0	0	0	0	0	0	0	0	0	0	0	0	0	0									748	0	0	0	0	0	0	0	0	0	0	0	0	0	0	0	0	0	0	0
	749	0	0	0	0	0	0	0	0	0	0	0	0	0	0	0	0	0	0	0	0									749	0	0	0	0	0	0	0	0	0	0	0	0	0	0	0	0	0	0	0
	750	0	0	0	0	0	0	0	0	0	0	0	0	0	0	0	0	0	0	0	0									750	0	0	0	0	0	0	0	0	0	0	0	0	0	0	0	0	0	0	0
	751	0	0	0	0	0	0	0	0	0	0	0	0	0	0	0	0	0	0	0	0									751	0	0	0	0	0	0	0	0	0	0	0	0	0	0	0	0	0	0	0
	752	0	0	0	0	0	0	0	0	0	0	0	0	0	0	0	0	0	0	0	0									752	0	0	0	0	0	0	0	0	0	0	0	0	0	0	0	0	0	0	0
	753	0	0	0	0	0	0	0	0	0	0	0	0	0	0	0	0	0	0	0	0									753	0	0	0	0	0	0	0	0	0	0	0	0	0	0	0	0	0	0	0
	754	0	0	0	0	0	0	0	0	0	0	0	0	0	0	0	0	0	0	0	0									754	0	0	0	0	0	0	0	0	0	0	0	0	0	0	0	0	0	0	0
	755	0	0	0	0	0	0	0	0	0	0	0	0	0	0	0	0	0	0	0	0									755	0	0	0	0	0	0	0	0	0	0	0	0	0	0	0	0	0	0	0
	756	0	0	0	0	0	0	0	0	0	0	0	0	0	0	0	0	0	0	0	0									756	0	0	0	0	0	0	0	0	0	0	0	0	0	0	0	0	0	0	0
	757	0	0	0	0	0	0	0	0	0	0	0	0	0	0	0	0	0	0	0	0									757	0	0	0	0	0	0	0	0	0	0	0	0	0	0	0	0	0	0	0
	758	0	0	0	0	0	0	0	0	0	0	0	0	0	0	0	0	0	0	0	0									758	0	0	0	0	0	0	0	0	0	0	0	0	0	0	0	0	0	0	0
	759	0	0	0	0	0	0	0	0	0	0	0	0	0	0	0	0	0	0	0	0									759	0	0	0	0	0	0	0	0	0	0	0	0	0	0	0	0	0	0	0
	760	0	0	0	0	0	0	0	0	0	0	0	0	0	0	0	0	0	0	0	0									760	0	0	0	0	0	0	0	0	0	0	0	0	0	0	0	0	0	0	0
	761	0	0	0	0	0	0	0	0	0	0	0	0	0	0	0	0	0	0	0	0									761	0	0	0	0	0	0	0	0	0	0	0	0	0	0	0	0	0	0	0
	762	0	0	0	0	0	0	0	0	0	0	0	0	0	0	0	0	0	0	0	0									762	0	0	0	0	0	0	0	0	0	0	0	0	0	0	0	0	0	0	0
	763	0	0	0	0	0	0	0	0	0	0	0	0	0	0	0	0	0	0	0	0									763	0	0	0	0	0	0	0	0	0	0	0	0	0	0	0	0	0	0	0
	764	0	0	0	0	0	0	0	0	0	0	0	0	0	0	0	0	0	0	0	0									764	0	0	0	0	0	0	0	0	0	0	0	0	0	0	0	0	0	0	0
	765	0	0	0	0	0	0	0	0	0	0	0	0	0	0	0	0	0	0	0	0									765	0	0	0	0	0	0	0	0	0	0	0	0	0	0	0	0	0	0	0
	766	0	0	0	0	0	0	0	0	0	0	0	0	0	0	0	0	0	0	0	0									766	0	0	0	0	0	0	0	0	0	0	0	0	0	0	0	0	0	0	0
	767	0	0	0	0	0	0	0	0	0	0	0	0	0	0	0	0	0	0	0	0									767	0	0	0	0	0	0	0	0	0	0	0	0	0	0	0	0	0	0	0
	768	0	0	0	0	0	0	0	0	0	0	0	0	0	0	0	0	0	0	0	0									768	0	0	0	0	0	0	0	0	0	0	0	0	0	0	0	0	0	0	0
	769	0	0	0	0	0	0	0	0	0	0	0	0	0	0	0	0	0	0	0	0									769	0	0	0	0	0	0	0	0	0	0	0	0	0	0	0	0	0	0	0
	770	0	0	0	0	0	0	0	0	0	0	0	0	0	0	0	0	0	0	0	0									770	0	0	0	0	0	0	0	0	0	0	0	0	0	0	0	0	0	0	0
	771	0	0	0	0	0	0	0	0	0	0	0	0	0	0	0	0	0	0	0	0									771	0	0	0	0	0	0	0	0	0	0	0	0	0	0	0	0	0	0	0
	772	0	0	0	0	0	0	0	0	0	0	0	0	0	0	0	0	0	0	0	0									772	0	0	0	0	0	0	0	0	0	0	0	0	0	0	0	0	0	0	0
	773	0	0	0	0	0	0	0	0	0	0	0	0	0	0	0	0	0	0	0	0									773	0	0	0	0	0	0	0	0	0	0	0	0	0	0	0	0	0	0	0
	774	0	0	0	0	0	0	0	0	0	0	0	0	0	0	0	0	0	0	0	0									774	0	0	0	0	0	0	0	0	0	0	0	0	0	0	0	0	0	0	0
	775	0	0	0	0	0	0	0	0	0	0	0	0	0	0	0	0	0	0	0	0									775	0	0	0	0	0	0	0	0	0	0	0	0	0	0	0	0	0	0	0
	776	0	0	0	0	0	0	0	0	0	0	0	0	0	0	0	0	0	0	0	0									776	0	0	0	0	0	0	0	0	0	0	0	0	0	0	0	0	0	0	0
	777	0	0	0	0	0	0	0	0	0	0	0	0	0	0	0	0	0	0	0	0									777	0	0	0	0	0	0	0	0	0	0	0	0	0	0	0	0	0	0	0
	778	0	0	0	0	0	0	0	0	0	0	0	0	0	0	0	0	0	0	0	0									778	0	0	0	0	0	0	0	0	0	0	0	0	0	0	0	0	0	0	0
	779	0	0	0	0	0	0	0	0	0	0	0	0	0	0	0	0	0	0	0	0									779	0	0	0	0	0	0	0	0	0	0	0	0	0	0	0	0	0	0	0
	780	0	0	0	0	0	0	0	0	0	0	0	0	0	0	0	0	0	0	0	0									780	0	0	0	0	0	0	0	0	0	0	0	0	0	0	0	0	0	0	0
	781	0	0	0	0	0	0	0	0	0	0	0	0	0	0	0	0	0	0	0	0									781	0	0	0	0	0	0	0	0	0	0	0	0	0	0	0	0	0	0	0
	782	0	0	0	0	0	0	0	0	0	0	0	0	0	0	0	0	0	0	0	0									782	0	0	0	0	0	0	0	0	0	0	0	0	0	0	0	0	0	0	0
	783	0	0	0	0	0	0	0	0	0	0	0	0	0	0	0	0	0	0	0	0									783	0	0	0	0	0	0	0	0	0	0	0	0	0	0	0	0	0	0	0
	784	0	0	0	0	0	0	0	0	0	0	0	0	0	0	0	0	0	0	0	0									784	0	0	0	0	0	0	0	0	0	0	0	0	0	0	0	0	0	0	0
	785	0	0	0	0	0	0	0	0	0	0	0	0	0	0	0	0	0	0	0	0									785	0	0	0	0	0	0	0	0	0	0	0	0	0	0	0	0	0	0	0
	786	0	0	0	0	0	0	0	0	0	0	0	0	0	0	0	0	0	0	0	0									786	0	0	0	0	0	0	0	0	0	0	0	0	0	0	0	0	0	0	0
	787	0	0	0	0	0	0	0	0	0	0	0	0	0	0	0	0	0	0	0	0									787	0	0	0	0	0	0	0	0	0	0	0	0	0	0	0	0	0	0	0
	788	0	0	0	0	0	0	0	0	0	0	0	0	0	0	0	0	0	0	0	0									788	0	0	0	0	0	0	0	0	0	0	0	0	0	0	0	0	0	0	0
	789	0	0	0	0	0	0	0	0	0	0	0	0	0	0	0	0	0	0	0	0									789	0	0	0	0	0	0	0	0	0	0	0	0	0	0	0	0	0	0	0
	790	0	0	0	0	0	0	0	0	0	0	0	0	0	0	0	0	0	0	0	0									790	0	0	0	0	0	0	0	0	0	0	0	0	0	0	0	0	0	0	0
	791	0	0	0	0	0	0	0	0	0	0	0	0	0	0	0	0	0	0	0	0									791	0	0	0	0	0	0	0	0	0	0	0	0	0	0	0	0	0	0	0
	792	0	0	0	0	0	0	0	0	0	0	0	0	0	0	0	0	0	0	0	0									792	0	0	0	0	0	0	0	0	0	0	0	0	0	0	0	0	0	0	0
	793	0	0	0	0	0	0	0	0	0	0	0	0	0	0	0	0	0	0	0	0									793	0	0	0	0	0	0	0	0	0	0	0	0	0	0	0	0	0	0	0
	794	0	0	0	0	0	0	0	0	0	0	0	0	0	0	0	0	0	0	0	0									794	0	0	0	0	0	0	0	0	0	0	0	0	0	0	0	0	0	0	0
	795	0	0	0	0	0	0	0	0	0	0	0	0	0	0	0	0	0	0	0	0									795	0	0	0	0	0	0	0	0	0	0	0	0	0	0	0	0	0	0	0
	796	0	0	0	0	0	0	0	0	0	0	0	0	0	0	0	0	0	0	0	0									796	0	0	0	0	0	0	0	0	0	0	0	0	0	0	0	0	0	0	0
	797	0	0	0	0	0	0	0	0	0	0	0	0	0	0	0	0	0	0	0	0									797	0	0	0	0	0	0	0	0	0	0	0	0	0	0	0	0	0	0	0
	798	0	0	0	0	0	0	0	0	0	0	0	0	0	0	0	0	0	0	0	0									798	0	0	0	0	0	0	0	0	0	0	0	0	0	0	0	0	0	0	0
	799	0	0	0	0	0	0	0	0	0	0	0	0	0	0	0	0	0	0	0	0									799	0	0	0	0	0	0	0	0	0	0	0	0	0	0	0	0	0	0	0
	800	0	0	0	0	0	0	0	0	0	0	0	0	0	0	0	0	0	0	0	0									800	0	0	0	0	0	0	0	0	0	0	0	0	0	0	0	0	0	0	0
	801	0	0	0	0	0	0	0	0	0	0	0	0	0	0	0	0	0	0	0	0									801	0	0	0	0	0	0	0	0	0	0	0	0	0	0	0	0	0	0	0
	802	0	0	0	0	0	0	0	0	0	0	0	0	0	0	0	0	0	0	0	0									802	0	0	0	0	0	0	0	0	0	0	0	0	0	0	0	0	0	0	0
	803	0	0	0	0	0	0	0	0	0	0	0	0	0	0	0	0	0	0	0	0									803	0	0	0	0	0	0	0	0	0	0	0	0	0	0	0	0	0	0	0
	804	0	0	0	0	0	0	0	0	0	0	0	0	0	0	0	0	0	0	0	0									804	0	0	0	0	0	0	0	0	0	0	0	0	0	0	0	0	0	0	0
	805	0	0	0	0	0	0	0	0	0	0	0	0	0	0	0	0	0	0	0	0									805	0	0	0	0	0	0	0	0	0	0	0	0	0	0	0	0	0	0	0
	806	0	0	0	0	0	0	0	0	0	0	0	0	0	0	0	0	0	0	0	0									806	0	0	0	0	0	0	0	0	0	0	0	0	0	0	0	0	0	0	0
	807	0	0	0	0	0	0	0	0	0	0	0	0	0	0	0	0	0	0	0	0									807	0	0	0	0	0	0	0	0	0	0	0	0	0	0	0	0	0	0	0
	808	0	0	0	0	0	0	0	0	0	0	0	0	0	0	0	0	0	0	0	0									808	0	0	0	0	0	0	0	0	0	0	0	0	0	0	0	0	0	0	0
	809	0	0	0	0	0	0	0	0	0	0	0	0	0	0	0	0	0	0	0	0									809	0	0	0	0	0	0	0	0	0	0	0	0	0	0	0	0	0	0	0
	810	0	0	0	0	0	0	0	0	0	0	0	0	0	0	0	0	0	0	0	0									810	0	0	0	0	0	0	0	0	0	0	0	0	0	0	0	0	0	0	0
	811	0	0	0	0	0	0	0	0	0	0	0	0	0	0	0	0	0	0	0	0									811	0	0	0	0	0	0	0	0	0	0	0	0	0	0	0	0	0	0	0
	812	0	0	0	0	0	0	0	0	0	0	0	0	0	0	0	0	0	0	0	0									812	0	0	0	0	0	0	0	0	0	0	0	0	0	0	0	0	0	0	0
	813	0	0	0	0	0	0	0	0	0	0	0	0	0	0	0	0	0	0	0	0									813	0	0	0	0	0	0	0	0	0	0	0	0	0	0	0	0	0	0	0
	814	0	0	0	0	0	0	0	0	0	0	0	0	0	0	0	0	0	0	0	0									814	0	0	0	0	0	0	0	0	0	0	0	0	0	0	0	0	0	0	0
	815	0	0	0	0	0	0	0	0	0	0	0	0	0	0	0	0	0	0	0	0									815	0	0	0	0	0	0	0	0	0	0	0	0	0	0	0	0	0	0	0
	816	0	0	0	0	0	0	0	0	0	0	0	0	0	0	0	0	0	0	0	0									816	0	0	0	0	0	0	0	0	0	0	0	0	0	0	0	0	0	0	0
	817	0	0	0	0	0	0	0	0	0	0	0	0	0	0	0	0	0	0	0	0									817	0	0	0	0	0	0	0	0	0	0	0	0	0	0	0	0	0	0	0
	818	0	0	0	0	0	0	0	0	0	0	0	0	0	0	0	0	0	0	0	0									818	0	0	0	0	0	0	0	0	0	0	0	0	0	0	0	0	0	0	0
	819	0	0	0	0	0	0	0	0	0	0	0	0	0	0	0	0	0	0	0	0									819	0	0	0	0	0	0	0	0	0	0	0	0	0	0	0	0	0	0	0
	820	0	0	0	0	0	0	0	0	0	0	0	0	0	0	0	0	0	0	0	0									820	0	0	0	0	0	0	0	0	0	0	0	0	0	0	0	0	0	0	0
	821	0	0	0	0	0	0	0	0	0	0	0	0	0	0	0	0	0	0	0	0									821	0	0	0	0	0	0	0	0	0	0	0	0	0	0	0	0	0	0	0
	822	0	0	0	0	0	0	0	0	0	0	0	0	0	0	0	0	0	0	0	0									822	0	0	0	0	0	0	0	0	0	0	0	0	0	0	0	0	0	0	0
	823	0	0	0	0	0	0	0	0	0	0	0	0	0	0	0	0	0	0	0	0									823	0	0	0	0	0	0	0	0	0	0	0	0	0	0	0	0	0	0	0
	824	0	0	0	0	0	0	0	0	0	0	0	0	0	0	0	0	0	0	0	0									824	0	0	0	0	0	0	0	0	0	0	0	0	0	0	0	0	0	0	0
	825	0	0	0	0	0	0	0	0	0	0	0	0	0	0	0	0	0	0	0	0									825	0	0	0	0	0	0	0	0	0	0	0	0	0	0	0	0	0	0	0
	826	0	0	0	0	0	0	0	0	0	0	0	0	0	0	0	0	0	0	0	0									826	0	0	0	0	0	0	0	0	0	0	0	0	0	0	0	0	0	0	0
	827	0	0	0	0	0	0	0	0	0	0	0	0	0	0	0	0	0	0	0	0									827	0	0	0	0	0	0	0	0	0	0	0	0	0	0	0	0	0	0	0
	828	0	0	0	0	0	0	0	0	0	0	0	0	0	0	0	0	0	0	0	0									828	0	0	0	0	0	0	0	0	0	0	0	0	0	0	0	0	0	0	0
	829	0	0	0	0	0	0	0	0	0	0	0	0	0	0	0	0	0	0	0	0									829	0	0	0	0	0	0	0	0	0	0	0	0	0	0	0	0	0	0	0
	830	0	0	0	0	0	0	0	0	0	0	0	0	0	0	0	0	0	0	0	0									830	0	0	0	0	0	0	0	0	0	0	0	0	0	0	0	0	0	0	0
	831	0	0	0	0	0	0	0	0	0	0	0	0	0	0	0	0	0	0	0	0									831	0	0	0	0	0	0	0	0	0	0	0	0	0	0	0	0	0	0	0
	832	0	0	0	0	0	0	0	0	0	0	0	0	0	0	0	0	0	0	0	0									832	0	0	0	0	0	0	0	0	0	0	0	0	0	0	0	0	0	0	0
	833	0	0	0	0	0	0	0	0	0	0	0	0	0	0	0	0	0	0	0	0									833	0	0	0	0	0	0	0	0	0	0	0	0	0	0	0	0	0	0	0
	834	0	0	0	0	0	0	0	0	0	0	0	0	0	0	0	0	0	0	0	0									834	0	0	0	0	0	0	0	0	0	0	0	0	0	0	0	0	0	0	0
	835	0	0	0	0	0	0	0	0	0	0	0	0	0	0	0	0	0	0	0	0									835	0	0	0	0	0	0	0	0	0	0	0	0	0	0	0	0	0	0	0
	836	0	0	0	0	0	0	0	0	0	0	0	0	0	0	0	0	0	0	0	0									836	0	0	0	0	0	0	0	0	0	0	0	0	0	0	0	0	0	0	0
	837	0	0	0	0	0	0	0	0	0	0	0	0	0	0	0	0	0	0	0	0									837	0	0	0	0	0	0	0	0	0	0	0	0	0	0	0	0	0	0	0
	838	0	0	0	0	0	0	0	0	0	0	0	0	0	0	0	0	0	0	0	0									838	0	0	0	0	0	0	0	0	0	0	0	0	0	0	0	0	0	0	0
	839	0	0	0	0	0	0	0	0	0	0	0	0	0	0	0	0	0	0	0	0									839	0	0	0	0	0	0	0	0	0	0	0	0	0	0	0	0	0	0	0
	840	0	0	0	0	0	0	0	0	0	0	0	0	0	0	0	0	0	0	0	0									840	0	0	0	0	0	0	0	0	0	0	0	0	0	0	0	0	0	0	0
	841	0	0	0	0	0	0	0	0	0	0	0	0	0	0	0	0	0	0	0	0									841	0	0	0	0	0	0	0	0	0	0	0	0	0	0	0	0	0	0	0
	842	0	0	0	0	0	0	0	0	0	0	0	0	0	0	0	0	0	0	0	0									842	0	0	0	0	0	0	0	0	0	0	0	0	0	0	0	0	0	0	0
	843	0	0	0	0	0	0	0	0	0	0	0	0	0	0	0	0	0	0	0	0									843	0	0	0	0	0	0	0	0	0	0	0	0	0	0	0	0	0	0	0
	844	0	0	0	0	0	0	0	0	0	0	0	0	0	0	0	0	0	0	0	0									844	0	0	0	0	0	0	0	0	0	0	0	0	0	0	0	0	0	0	0
	845	0	0	0	0	0	0	0	0	0	0	0	0	0	0	0	0	0	0	0	0									845	0	0	0	0	0	0	0	0	0	0	0	0	0	0	0	0	0	0	0
	846	0	0	0	0	0	0	0	0	0	0	0	0	0	0	0	0	0	0	0	0									846	0	0	0	0	0	0	0	0	0	0	0	0	0	0	0	0	0	0	0
	847	0	0	0	0	0	0	0	0	0	0	0	0	0	0	0	0	0	0	0	0									847	0	0	0	0	0	0	0	0	0	0	0	0	0	0	0	0	0	0	0
	848	0	0	0	0	0	0	0	0	0	0	0	0	0	0	0	0	0	0	0	0									848	0	0	0	0	0	0	0	0	0	0	0	0	0	0	0	0	0	0	0
	849	0	0	0	0	0	0	0	0	0	0	0	0	0	0	0	0	0	0	0	0									849	0	0	0	0	0	0	0	0	0	0	0	0	0	0	0	0	0	0	0
	850	0	0	0	0	0	0	0	0	0	0	0	0	0	0	0	0	0	0	0	0									850	0	0	0	0	0	0	0	0	0	0	0	0	0	0	0	0	0	0	0
	851	0	0	0	0	0	0	0	0	0	0	0	0	0	0	0	0	0	0	0	0									851	0	0	0	0	0	0	0	0	0	0	0	0	0	0	0	0	0	0	0
	852	0	0	0	0	0	0	0	0	0	0	0	0	0	0	0	0	0	0	0	0									852	0	0	0	0	0	0	0	0	0	0	0	0	0	0	0	0	0	0	0
	853	0	0	0	0	0	0	0	0	0	0	0	0	0	0	0	0	0	0	0	0									853	0	0	0	0	0	0	0	0	0	0	0	0	0	0	0	0	0	0	0
	854	0	0	0	0	0	0	0	0	0	0	0	0	0	0	0	0	0	0	0	0									854	0	0	0	0	0	0	0	0	0	0	0	0	0	0	0	0	0	0	0
	855	0	0	0	0	0	0	0	0	0	0	0	0	0	0	0	0	0	0	0	0									855	0	0	0	0	0	0	0	0	0	0	0	0	0	0	0	0	0	0	0
	856	0	0	0	0	0	0	0	0	0	0	0	0	0	0	0	0	0	0	0	0									856	0	0	0	0	0	0	0	0	0	0	0	0	0	0	0	0	0	0	0
	857	0	0	0	0	0	0	0	0	0	0	0	0	0	0	0	0	0	0	0	0									857	0	0	0	0	0	0	0	0	0	0	0	0	0	0	0	0	0	0	0
	858	0	0	0	0	0	0	0	0	0	0	0	0	0	0	0	0	0	0	0	0									858	0	0	0	0	0	0	0	0	0	0	0	0	0	0	0	0	0	0	0
	859	0	0	0	0	0	0	0	0	0	0	0	0	0	0	0	0	0	0	0	0									859	0	0	0	0	0	0	0	0	0	0	0	0	0	0	0	0	0	0	0
	860	0	0	0	0	0	0	0	0	0	0	0	0	0	0	0	0	0	0	0	0									860	0	0	0	0	0	0	0	0	0	0	0	0	0	0	0	0	0	0	0
	861	0	0	0	0	0	0	0	0	0	0	0	0	0	0	0	0	0	0	0	0									861	0	0	0	0	0	0	0	0	0	0	0	0	0	0	0	0	0	0	0
	862	0	0	0	0	0	0	0	0	0	0	0	0	0	0	0	0	0	0	0	0									862	0	0	0	0	0	0	0	0	0	0	0	0	0	0	0	0	0	0	0
	863	0	0	0	0	0	0	0	0	0	0	0	0	0	0	0	0	0	0	0	0									863	0	0	0	0	0	0	0	0	0	0	0	0	0	0	0	0	0	0	0
	864	0	0	0	0	0	0	0	0	0	0	0	0	0	0	0	0	0	0	0	0									864	0	0	0	0	0	0	0	0	0	0	0	0	0	0	0	0	0	0	0
	865	0	0	0	0	0	0	0	0	0	0	0	0	0	0	0	0	0	0	0	0									865	0	0	0	0	0	0	0	0	0	0	0	0	0	0	0	0	0	0	0
	866	0	0	0	0	0	0	0	0	0	0	0	0	0	0	0	0	0	0	0	0									866	0	0	0	0	0	0	0	0	0	0	0	0	0	0	0	0	0	0	0
	867	0	0	0	0	0	0	0	0	0	0	0	0	0	0	0	0	0	0	0	0									867	0	0	0	0	0	0	0	0	0	0	0	0	0	0	0	0	0	0	0
	868	0	0	0	0	0	0	0	0	0	0	0	0	0	0	0	0	0	0	0	0									868	0	0	0	0	0	0	0	0	0	0	0	0	0	0	0	0	0	0	0
	869	0	0	0	0	0	0	0	0	0	0	0	0	0	0	0	0	0	0	0	0									869	0	0	0	0	0	0	0	0	0	0	0	0	0	0	0	0	0	0	0
	870	0	0	0	0	0	0	0	0	0	0	0	0	0	0	0	0	0	0	0	0									870	0	0	0	0	0	0	0	0	0	0	0	0	0	0	0	0	0	0	0
	871	0	0	0	0	0	0	0	0	0	0	0	0	0	0	0	0	0	0	0	0									871	0	0	0	0	0	0	0	0	0	0	0	0	0	0	0	0	0	0	0
	872	0	0	0	0	0	0	0	0	0	0	0	0	0	0	0	0	0	0	0	0									872	0	0	0	0	0	0	0	0	0	0	0	0	0	0	0	0	0	0	0
	873	0	0	0	0	0	0	0	0	0	0	0	0	0	0	0	0	0	0	0	0									873	0	0	0	0	0	0	0	0	0	0	0	0	0	0	0	0	0	0	0
	874	0	0	0	0	0	0	0	0	0	0	0	0	0	0	0	0	0	0	0	0									874	0	0	0	0	0	0	0	0	0	0	0	0	0	0	0	0	0	0	0
	875	0	0	0	0	0	0	0	0	0	0	0	0	0	0	0	0	0	0	0	0									875	0	0	0	0	0	0	0	0	0	0	0	0	0	0	0	0	0	0	0
	876	0	0	0	0	0	0	0	0	0	0	0	0	0	0	0	0	0	0	0	0									876	0	0	0	0	0	0	0	0	0	0	0	0	0	0	0	0	0	0	0
	877	0	0	0	0	0	0	0	0	0	0	0	0	0	0	0	0	0	0	0	0									877	0	0	0	0	0	0	0	0	0	0	0	0	0	0	0	0	0	0	0
	878	0	0	0	0	0	0	0	0	0	0	0	0	0	0	0	0	0	0	0	0									878	0	0	0	0	0	0	0	0	0	0	0	0	0	0	0	0	0	0	0
	879	0	0	0	0	0	0	0	0	0	0	0	0	0	0	0	0	0	0	0	0									879	0	0	0	0	0	0	0	0	0	0	0	0	0	0	0	0	0	0	0
	880	0	0	0	0	0	0	0	0	0	0	0	0	0	0	0	0	0	0	0	0									880	0	0	0	0	0	0	0	0	0	0	0	0	0	0	0	0	0	0	0
	881	0	0	0	0	0	0	0	0	0	0	0	0	0	0	0	0	0	0	0	0									881	0	0	0	0	0	0	0	0	0	0	0	0	0	0	0	0	0	0	0
	882	0	0	0	0	0	0	0	0	0	0	0	0	0	0	0	0	0	0	0	0									882	0	0	0	0	0	0	0	0	0	0	0	0	0	0	0	0	0	0	0
	883	0	0	0	0	0	0	0	0	0	0	0	0	0	0	0	0	0	0	0	0									883	0	0	0	0	0	0	0	0	0	0	0	0	0	0	0	0	0	0	0
	884	0	0	0	0	0	0	0	0	0	0	0	0	0	0	0	0	0	0	0	0									884	0	0	0	0	0	0	0	0	0	0	0	0	0	0	0	0	0	0	0
	885	0	0	0	0	0	0	0	0	0	0	0	0	0	0	0	0	0	0	0	0									885	0	0	0	0	0	0	0	0	0	0	0	0	0	0	0	0	0	0	0
	886	0	0	0	0	0	0	0	0	0	0	0	0	0	0	0	0	0	0	0	0									886	0	0	0	0	0	0	0	0	0	0	0	0	0	0	0	0	0	0	0
	887	0	0	0	0	0	0	0	0	0	0	0	0	0	0	0	0	0	0	0	0									887	0	0	0	0	0	0	0	0	0	0	0	0	0	0	0	0	0	0	0
	888	0	0	0	0	0	0	0	0	0	0	0	0	0	0	0	0	0	0	0	0									888	0	0	0	0	0	0	0	0	0	0	0	0	0	0	0	0	0	0	0
	889	0	0	0	0	0	0	0	0	0	0	0	0	0	0	0	0	0	0	0	0									889	0	0	0	0	0	0	0	0	0	0	0	0	0	0	0	0	0	0	0
	890	0	0	0	0	0	0	0	0	0	0	0	0	0	0	0	0	0	0	0	0									890	0	0	0	0	0	0	0	0	0	0	0	0	0	0	0	0	0	0	0
	891	0	0	0	0	0	0	0	0	0	0	0	0	0	0	0	0	0	0	0	0									891	0	0	0	0	0	0	0	0	0	0	0	0	0	0	0	0	0	0	0
	892	0	0	0	0	0	0	0	0	0	0	0	0	0	0	0	0	0	0	0	0									892	0	0	0	0	0	0	0	0	0	0	0	0	0	0	0	0	0	0	0
	893	0	0	0	0	0	0	0	0	0	0	0	0	0	0	0	0	0	0	0	0									893	0	0	0	0	0	0	0	0	0	0	0	0	0	0	0	0	0	0	0
	894	0	0	0	0	0	0	0	0	0	0	0	0	0	0	0	0	0	0	0	0									894	0	0	0	0	0	0	0	0	0	0	0	0	0	0	0	0	0	0	0
	895	0	0	0	0	0	0	0	0	0	0	0	0	0	0	0	0	0	0	0	0									895	0	0	0	0	0	0	0	0	0	0	0	0	0	0	0	0	0	0	0
	896	0	0	0	0	0	0	0	0	0	0	0	0	0	0	0	0	0	0	0	0									896	0	0	0	0	0	0	0	0	0	0	0	0	0	0	0	0	0	0	0
	897	0	0	0	0	0	0	0	0	0	0	0	0	0	0	0	0	0	0	0	0									897	0	0	0	0	0	0	0	0	0	0	0	0	0	0	0	0	0	0	0
	898	0	0	0	0	0	0	0	0	0	0	0	0	0	0	0	0	0	0	0	0									898	0	0	0	0	0	0	0	0	0	0	0	0	0	0	0	0	0	0	0
	899	0	0	0	0	0	0	0	0	0	0	0	0	0	0	0	0	0	0	0	0									899	0	0	0	0	0	0	0	0	0	0	0	0	0	0	0	0	0	0	0
	900	0	0	0	0	0	0	0	0	0	0	0	0	0	0	0	0	0	0	0	0									900	0	0	0	0	0	0	0	0	0	0	0	0	0	0	0	0	0	0	0
	901	0	0	0	0	0	0	0	0	0	0	0	0	0	0	0	0	0	0	0	0									901	0	0	0	0	0	0	0	0	0	0	0	0	0	0	0	0	0	0	0
	902	0	0	0	0	0	0	0	0	0	0	0	0	0	0	0	0	0	0	0	0									902	0	0	0	0	0	0	0	0	0	0	0	0	0	0	0	0	0	0	0
	903	0	0	0	0	0	0	0	0	0	0	0	0	0	0	0	0	0	0	0	0									903	0	0	0	0	0	0	0	0	0	0	0	0	0	0	0	0	0	0	0
	904	0	0	0	0	0	0	0	0	0	0	0	0	0	0	0	0	0	0	0	0									904	0	0	0	0	0	0	0	0	0	0	0	0	0	0	0	0	0	0	0
	905	0	0	0	0	0	0	0	0	0	0	0	0	0	0	0	0	0	0	0	0									905	0	0	0	0	0	0	0	0	0	0	0	0	0	0	0	0	0	0	0
	906	0	0	0	0	0	0	0	0	0	0	0	0	0	0	0	0	0	0	0	0									906	0	0	0	0	0	0	0	0	0	0	0	0	0	0	0	0	0	0	0
	907	0	0	0	0	0	0	0	0	0	0	0	0	0	0	0	0	0	0	0	0									907	0	0	0	0	0	0	0	0	0	0	0	0	0	0	0	0	0	0	0
	908	0	0	0	0	0	0	0	0	0	0	0	0	0	0	0	0	0	0	0	0									908	0	0	0	0	0	0	0	0	0	0	0	0	0	0	0	0	0	0	0
	909	0	0	0	0	0	0	0	0	0	0	0	0	0	0	0	0	0	0	0	0									909	0	0	0	0	0	0	0	0	0	0	0	0	0	0	0	0	0	0	0
	910	0	0	0	0	0	0	0	0	0	0	0	0	0	0	0	0	0	0	0	0									910	0	0	0	0	0	0	0	0	0	0	0	0	0	0	0	0	0	0	0
	911	0	0	0	0	0	0	0	0	0	0	0	0	0	0	0	0	0	0	0	0									911	0	0	0	0	0	0	0	0	0	0	0	0	0	0	0	0	0	0	0
	912	0	0	0	0	0	0	0	0	0	0	0	0	0	0	0	0	0	0	0	0									912	0	0	0	0	0	0	0	0	0	0	0	0	0	0	0	0	0	0	0
	913	0	0	0	0	0	0	0	0	0	0	0	0	0	0	0	0	0	0	0	0									913	0	0	0	0	0	0	0	0	0	0	0	0	0	0	0	0	0	0	0
	914	0	0	0	0	0	0	0	0	0	0	0	0	0	0	0	0	0	0	0	0									914	0	0	0	0	0	0	0	0	0	0	0	0	0	0	0	0	0	0	0
	915	0	0	0	0	0	0	0	0	0	0	0	0	0	0	0	0	0	0	0	0									915	0	0	0	0	0	0	0	0	0	0	0	0	0	0	0	0	0	0	0
	916	0	0	0	0	0	0	0	0	0	0	0	0	0	0	0	0	0	0	0	0									916	0	0	0	0	0	0	0	0	0	0	0	0	0	0	0	0	0	0	0
	917	0	0	0	0	0	0	0	0	0	0	0	0	0	0	0	0	0	0	0	0									917	0	0	0	0	0	0	0	0	0	0	0	0	0	0	0	0	0	0	0
	918	0	0	0	0	0	0	0	0	0	0	0	0	0	0	0	0	0	0	0	0									918	0	0	0	0	0	0	0	0	0	0	0	0	0	0	0	0	0	0	0
	919	0	0	0	0	0	0	0	0	0	0	0	0	0	0	0	0	0	0	0	0									919	0	0	0	0	0	0	0	0	0	0	0	0	0	0	0	0	0	0	0
	920	0	0	0	0	0	0	0	0	0	0	0	0	0	0	0	0	0	0	0	0									920	0	0	0	0	0	0	0	0	0	0	0	0	0	0	0	0	0	0	0
	921	0	0	0	0	0	0	0	0	0	0	0	0	0	0	0	0	0	0	0	0									921	0	0	0	0	0	0	0	0	0	0	0	0	0	0	0	0	0	0	0
	922	0	0	0	0	0	0	0	0	0	0	0	0	0	0	0	0	0	0	0	0									922	0	0	0	0	0	0	0	0	0	0	0	0	0	0	0	0	0	0	0
	923	0	0	0	0	0	0	0	0	0	0	0	0	0	0	0	0	0	0	0	0									923	0	0	0	0	0	0	0	0	0	0	0	0	0	0	0	0	0	0	0
	924	0	0	0	0	0	0	0	0	0	0	0	0	0	0	0	0	0	0	0	0									924	0	0	0	0	0	0	0	0	0	0	0	0	0	0	0	0	0	0	0
	925	0	0	0	0	0	0	0	0	0	0	0	0	0	0	0	0	0	0	0	0									925	0	0	0	0	0	0	0	0	0	0	0	0	0	0	0	0	0	0	0
	926	0	0	0	0	0	0	0	0	0	0	0	0	0	0	0	0	0	0	0	0									926	0	0	0	0	0	0	0	0	0	0	0	0	0	0	0	0	0	0	0
	927	0	0	0	0	0	0	0	0	0	0	0	0	0	0	0	0	0	0	0	0									927	0	0	0	0	0	0	0	0	0	0	0	0	0	0	0	0	0	0	0
	928	0	0	0	0	0	0	0	0	0	0	0	0	0	0	0	0	0	0	0	0									928	0	0	0	0	0	0	0	0	0	0	0	0	0	0	0	0	0	0	0
	929	0	0	0	0	0	0	0	0	0	0	0	0	0	0	0	0	0	0	0	0									929	0	0	0	0	0	0	0	0	0	0	0	0	0	0	0	0	0	0	0
	930	0	0	0	0	0	0	0	0	0	0	0	0	0	0	0	0	0	0	0	0									930	0	0	0	0	0	0	0	0	0	0	0	0	0	0	0	0	0	0	0
	931	0	0	0	0	0	0	0	0	0	0	0	0	0	0	0	0	0	0	0	0									931	0	0	0	0	0	0	0	0	0	0	0	0	0	0	0	0	0	0	0
	932	0	0	0	0	0	0	0	0	0	0	0	0	0	0	0	0	0	0	0	0									932	0	0	0	0	0	0	0	0	0	0	0	0	0	0	0	0	0	0	0
	933	0	0	0	0	0	0	0	0	0	0	0	0	0	0	0	0	0	0	0	0									933	0	0	0	0	0	0	0	0	0	0	0	0	0	0	0	0	0	0	0
	934	0	0	0	0	0	0	0	0	0	0	0	0	0	0	0	0	0	0	0	0									934	0	0	0	0	0	0	0	0	0	0	0	0	0	0	0	0	0	0	0
	935	0	0	0	0	0	0	0	0	0	0	0	0	0	0	0	0	0	0	0	0									935	0	0	0	0	0	0	0	0	0	0	0	0	0	0	0	0	0	0	0
	936	0	0	0	0	0	0	0	0	0	0	0	0	0	0	0	0	0	0	0	0									936	0	0	0	0	0	0	0	0	0	0	0	0	0	0	0	0	0	0	0
	937	0	0	0	0	0	0	0	0	0	0	0	0	0	0	0	0	0	0	0	0									937	0	0	0	0	0	0	0	0	0	0	0	0	0	0	0	0	0	0	0
	938	0	0	0	0	0	0	0	0	0	0	0	0	0	0	0	0	0	0	0	0									938	0	0	0	0	0	0	0	0	0	0	0	0	0	0	0	0	0	0	0
	939	0	0	0	0	0	0	0	0	0	0	0	0	0	0	0	0	0	0	0	0									939	0	0	0	0	0	0	0	0	0	0	0	0	0	0	0	0	0	0	0
	940	0	0	0	0	0	0	0	0	0	0	0	0	0	0	0	0	0	0	0	0									940	0	0	0	0	0	0	0	0	0	0	0	0	0	0	0	0	0	0	0
	941	0	0	0	0	0	0	0	0	0	0	0	0	0	0	0	0	0	0	0	0									941	0	0	0	0	0	0	0	0	0	0	0	0	0	0	0	0	0	0	0
	942	0	0	0	0	0	0	0	0	0	0	0	0	0	0	0	0	0	0	0	0									942	0	0	0	0	0	0	0	0	0	0	0	0	0	0	0	0	0	0	0
	943	0	0	0	0	0	0	0	0	0	0	0	0	0	0	0	0	0	0	0	0									943	0	0	0	0	0	0	0	0	0	0	0	0	0	0	0	0	0	0	0
	944	0	0	0	0	0	0	0	0	0	0	0	0	0	0	0	0	0	0	0	0									944	0	0	0	0	0	0	0	0	0	0	0	0	0	0	0	0	0	0	0
	945	0	0	0	0	0	0	0	0	0	0	0	0	0	0	0	0	0	0	0	0									945	0	0	0	0	0	0	0	0	0	0	0	0	0	0	0	0	0	0	0
	946	0	0	0	0	0	0	0	0	0	0	0	0	0	0	0	0	0	0	0	0									946	0	0	0	0	0	0	0	0	0	0	0	0	0	0	0	0	0	0	0
	947	0	0	0	0	0	0	0	0	0	0	0	0	0	0	0	0	0	0	0	0									947	0	0	0	0	0	0	0	0	0	0	0	0	0	0	0	0	0	0	0
	948	0	0	0	0	0	0	0	0	0	0	0	0	0	0	0	0	0	0	0	0									948	0	0	0	0	0	0	0	0	0	0	0	0	0	0	0	0	0	0	0
	949	0	0	0	0	0	0	0	0	0	0	0	0	0	0	0	0	0	0	0	0									949	0	0	0	0	0	0	0	0	0	0	0	0	0	0	0	0	0	0	0
	950	0	0	0	0	0	0	0	0	0	0	0	0	0	0	0	0	0	0	0	0									950	0	0	0	0	0	0	0	0	0	0	0	0	0	0	0	0	0	0	0
	951	0	0	0	0	0	0	0	0	0	0	0	0	0	0	0	0	0	0	0	0									951	0	0	0	0	0	0	0	0	0	0	0	0	0	0	0	0	0	0	0
	952	0	0	0	0	0	0	0	0	0	0	0	0	0	0	0	0	0	0	0	0									952	0	0	0	0	0	0	0	0	0	0	0	0	0	0	0	0	0	0	0
	953	0	0	0	0	0	0	0	0	0	0	0	0	0	0	0	0	0	0	0	0									953	0	0	0	0	0	0	0	0	0	0	0	0	0	0	0	0	0	0	0
	954	0	0	0	0	0	0	0	0	0	0	0	0	0	0	0	0	0	0	0	0									954	0	0	0	0	0	0	0	0	0	0	0	0	0	0	0	0	0	0	0
	955	0	0	0	0	0	0	0	0	0	0	0	0	0	0	0	0	0	0	0	0									955	0	0	0	0	0	0	0	0	0	0	0	0	0	0	0	0	0	0	0
	956	0	0	0	0	0	0	0	0	0	0	0	0	0	0	0	0	0	0	0	0									956	0	0	0	0	0	0	0	0	0	0	0	0	0	0	0	0	0	0	0
	957	0	0	0	0	0	0	0	0	0	0	0	0	0	0	0	0	0	0	0	0									957	0	0	0	0	0	0	0	0	0	0	0	0	0	0	0	0	0	0	0
	958	0	0	0	0	0	0	0	0	0	0	0	0	0	0	0	0	0	0	0	0									958	0	0	0	0	0	0	0	0	0	0	0	0	0	0	0	0	0	0	0
	959	0	0	0	0	0	0	0	0	0	0	0	0	0	0	0	0	0	0	0	0									959	0	0	0	0	0	0	0	0	0	0	0	0	0	0	0	0	0	0	0
	960	0	0	0	0	0	0	0	0	0	0	0	0	0	0	0	0	0	0	0	0									960	0	0	0	0	0	0	0	0	0	0	0	0	0	0	0	0	0	0	0
	961	0	0	0	0	0	0	0	0	0	0	0	0	0	0	0	0	0	0	0	0									961	0	0	0	0	0	0	0	0	0	0	0	0	0	0	0	0	0	0	0
	962	0	0	0	0	0	0	0	0	0	0	0	0	0	0	0	0	0	0	0	0									962	0	0	0	0	0	0	0	0	0	0	0	0	0	0	0	0	0	0	0
	963	0	0	0	0	0	0	0	0	0	0	0	0	0	0	0	0	0	0	0	0									963	0	0	0	0	0	0	0	0	0	0	0	0	0	0	0	0	0	0	0
	964	0	0	0	0	0	0	0	0	0	0	0	0	0	0	0	0	0	0	0	0									964	0	0	0	0	0	0	0	0	0	0	0	0	0	0	0	0	0	0	0
	965	0	0	0	0	0	0	0	0	0	0	0	0	0	0	0	0	0	0	0	0									965	0	0	0	0	0	0	0	0	0	0	0	0	0	0	0	0	0	0	0
	966	0	0	0	0	0	0	0	0	0	0	0	0	0	0	0	0	0	0	0	0									966	0	0	0	0	0	0	0	0	0	0	0	0	0	0	0	0	0	0	0
	967	0	0	0	0	0	0	0	0	0	0	0	0	0	0	0	0	0	0	0	0									967	0	0	0	0	0	0	0	0	0	0	0	0	0	0	0	0	0	0	0
	968	0	0	0	0	0	0	0	0	0	0	0	0	0	0	0	0	0	0	0	0									968	0	0	0	0	0	0	0	0	0	0	0	0	0	0	0	0	0	0	0
	969	0	0	0	0	0	0	0	0	0	0	0	0	0	0	0	0	0	0	0	0									969	0	0	0	0	0	0	0	0	0	0	0	0	0	0	0	0	0	0	0
	970	0	0	0	0	0	0	0	0	0	0	0	0	0	0	0	0	0	0	0	0									970	0	0	0	0	0	0	0	0	0	0	0	0	0	0	0	0	0	0	0
	971	0	0	0	0	0	0	0	0	0	0	0	0	0	0	0	0	0	0	0	0									971	0	0	0	0	0	0	0	0	0	0	0	0	0	0	0	0	0	0	0
	972	0	0	0	0	0	0	0	0	0	0	0	0	0	0	0	0	0	0	0	0									972	0	0	0	0	0	0	0	0	0	0	0	0	0	0	0	0	0	0	0
	973	0	0	0	0	0	0	0	0	0	0	0	0	0	0	0	0	0	0	0	0									973	0	0	0	0	0	0	0	0	0	0	0	0	0	0	0	0	0	0	0
	974	0	0	0	0	0	0	0	0	0	0	0	0	0	0	0	0	0	0	0	0									974	0	0	0	0	0	0	0	0	0	0	0	0	0	0	0	0	0	0	0
	975	0	0	0	0	0	0	0	0	0	0	0	0	0	0	0	0	0	0	0	0									975	0	0	0	0	0	0	0	0	0	0	0	0	0	0	0	0	0	0	0
	976	0	0	0	0	0	0	0	0	0	0	0	0	0	0	0	0	0	0	0	0									976	0	0	0	0	0	0	0	0	0	0	0	0	0	0	0	0	0	0	0
	977	0	0	0	0	0	0	0	0	0	0	0	0	0	0	0	0	0	0	0	0									977	0	0	0	0	0	0	0	0	0	0	0	0	0	0	0	0	0	0	0
	978	0	0	0	0	0	0	0	0	0	0	0	0	0	0	0	0	0	0	0	0									978	0	0	0	0	0	0	0	0	0	0	0	0	0	0	0	0	0	0	0
	979	0	0	0	0	0	0	0	0	0	0	0	0	0	0	0	0	0	0	0	0									979	0	0	0	0	0	0	0	0	0	0	0	0	0	0	0	0	0	0	0
	980	0	0	0	0	0	0	0	0	0	0	0	0	0	0	0	0	0	0	0	0									980	0	0	0	0	0	0	0	0	0	0	0	0	0	0	0	0	0	0	0
	981	0	0	0	0	0	0	0	0	0	0	0	0	0	0	0	0	0	0	0	0									981	0	0	0	0	0	0	0	0	0	0	0	0	0	0	0	0	0	0	0
	982	0	0	0	0	0	0	0	0	0	0	0	0	0	0	0	0	0	0	0	0									982	0	0	0	0	0	0	0	0	0	0	0	0	0	0	0	0	0	0	0
	983	0	0	0	0	0	0	0	0	0	0	0	0	0	0	0	0	0	0	0	0									983	0	0	0	0	0	0	0	0	0	0	0	0	0	0	0	0	0	0	0
	984	0	0	0	0	0	0	0	0	0	0	0	0	0	0	0	0	0	0	0	0									984	0	0	0	0	0	0	0	0	0	0	0	0	0	0	0	0	0	0	0
	985	0	0	0	0	0	0	0	0	0	0	0	0	0	0	0	0	0	0	0	0									985	0	0	0	0	0	0	0	0	0	0	0	0	0	0	0	0	0	0	0
	986	0	0	0	0	0	0	0	0	0	0	0	0	0	0	0	0	0	0	0	0									986	0	0	0	0	0	0	0	0	0	0	0	0	0	0	0	0	0	0	0
	987	0	0	0	0	0	0	0	0	0	0	0	0	0	0	0	0	0	0	0	0									987	0	0	0	0	0	0	0	0	0	0	0	0	0	0	0	0	0	0	0
	988	0	0	0	0	0	0	0	0	0	0	0	0	0	0	0	0	0	0	0	0									988	0	0	0	0	0	0	0	0	0	0	0	0	0	0	0	0	0	0	0
	989	0	0	0	0	0	0	0	0	0	0	0	0	0	0	0	0	0	0	0	0									989	0	0	0	0	0	0	0	0	0	0	0	0	0	0	0	0	0	0	0
	990	0	0	0	0	0	0	0	0	0	0	0	0	0	0	0	0	0	0	0	0									990	0	0	0	0	0	0	0	0	0	0	0	0	0	0	0	0	0	0	0
	991	0	0	0	0	0	0	0	0	0	0	0	0	0	0	0	0	0	0	0	0									991	0	0	0	0	0	0	0	0	0	0	0	0	0	0	0	0	0	0	0
	992	0	0	0	0	0	0	0	0	0	0	0	0	0	0	0	0	0	0	0	0									992	0	0	0	0	0	0	0	0	0	0	0	0	0	0	0	0	0	0	0
	993	0	0	0	0	0	0	0	0	0	0	0	0	0	0	0	0	0	0	0	0									993	0	0	0	0	0	0	0	0	0	0	0	0	0	0	0	0	0	0	0
	994	0	0	0	0	0	0	0	0	0	0	0	0	0	0	0	0	0	0	0	0									994	0	0	0	0	0	0	0	0	0	0	0	0	0	0	0	0	0	0	0
	995	0	0	0	0	0	0	0	0	0	0	0	0	0	0	0	0	0	0	0	0									995	0	0	0	0	0	0	0	0	0	0	0	0	0	0	0	0	0	0	0
	996	0	0	0	0	0	0	0	0	0	0	0	0	0	0	0	0	0	0	0	0									996	0	0	0	0	0	0	0	0	0	0	0	0	0	0	0	0	0	0	0
	997	0	0	0	0	0	0	0	0	0	0	0	0	0	0	0	0	0	0	0	0									997	0	0	0	0	0	0	0	0	0	0	0	0	0	0	0	0	0	0	0
	998	0	0	0	0	0	0	0	0	0	0	0	0	0	0	0	0	0	0	0	0									998	0	0	0	0	0	0	0	0	0	0	0	0	0	0	0	0	0	0	0
	999	0	0	0	0	0	0	0	0	0	0	0	0	0	0	0	0	0	0	0	0									999	0	0	0	0	0	0	0	0	0	0	0	0	0	0	0	0	0	0	0
	1000	0	0	0	0	0	0	0	0	0	0	0	0	0	0	0	0	0	0	0	0									1000	0	0	0	0	0	0	0	0	0	0	0	0	0	0	0	0	0	0	0
	1001	0	0	0	0	0	0	0	0	0	0	0	0	0	0	0	0	0	0	0	0									1001	0	0	0	0	0	0	0	0	0	0	0	0	0	0	0	0	0	0	0
	1002	0	0	0	0	0	0	0	0	0	0	0	0	0	0	0	0	0	0	0	0									1002	0	0	0	0	0	0	0	0	0	0	0	0	0	0	0	0	0	0	0
	1003	0	0	0	0	0	0	0	0	0	0	0	0	0	0	0	0	0	0	0	0									1003	0	0	0	0	0	0	0	0	0	0	0	0	0	0	0	0	0	0	0
	1004	0	0	0	0	0	0	0	0	0	0	0	0	0	0	0	0	0	0	0	0									1004	0	0	0	0	0	0	0	0	0	0	0	0	0	0	0	0	0	0	0
	1005	0	0	0	0	0	0	0	0	0	0	0	0	0	0	0	0	0	0	0	0									1005	0	0	0	0	0	0	0	0	0	0	0	0	0	0	0	0	0	0	0
	1006	0	0	0	0	0	0	0	0	0	0	0	0	0	0	0	0	0	0	0	0									1006	0	0	0	0	0	0	0	0	0	0	0	0	0	0	0	0	0	0	0
	1007	0	0	0	0	0	0	0	0	0	0	0	0	0	0	0	0	0	0	0	0									1007	0	0	0	0	0	0	0	0	0	0	0	0	0	0	0	0	0	0	0
	1008	0	0	0	0	0	0	0	0	0	0	0	0	0	0	0	0	0	0	0	0									1008	0	0	0	0	0	0	0	0	0	0	0	0	0	0	0	0	0	0	0
	1009	0	0	0	0	0	0	0	0	0	0	0	0	0	0	0	0	0	0	0	0									1009	0	0	0	0	0	0	0	0	0	0	0	0	0	0	0	0	0	0	0
	1010	0	0	0	0	0	0	0	0	0	0	0	0	0	0	0	0	0	0	0	0									1010	0	0	0	0	0	0	0	0	0	0	0	0	0	0	0	0	0	0	0
	1011	0	0	0	0	0	0	0	0	0	0	0	0	0	0	0	0	0	0	0	0									1011	0	0	0	0	0	0	0	0	0	0	0	0	0	0	0	0	0	0	0
	1012	0	0	0	0	0	0	0	0	0	0	0	0	0	0	0	0	0	0	0	0									1012	0	0	0	0	0	0	0	0	0	0	0	0	0	0	0	0	0	0	0
	1013	0	0	0	0	0	0	0	0	0	0	0	0	0	0	0	0	0	0	0	0									1013	0	0	0	0	0	0	0	0	0	0	0	0	0	0	0	0	0	0	0
	1014	0	0	0	0	0	0	0	0	0	0	0	0	0	0	0	0	0	0	0	0									1014	0	0	0	0	0	0	0	0	0	0	0	0	0	0	0	0	0	0	0
	1015	0	0	0	0	0	0	0	0	0	0	0	0	0	0	0	0	0	0	0	0									1015	0	0	0	0	0	0	0	0	0	0	0	0	0	0	0	0	0	0	0
	1016	0	0	0	0	0	0	0	0	0	0	0	0	0	0	0	0	0	0	0	0									1016	0	0	0	0	0	0	0	0	0	0	0	0	0	0	0	0	0	0	0
	1017	0	0	0	0	0	0	0	0	0	0	0	0	0	0	0	0	0	0	0	0									1017	0	0	0	0	0	0	0	0	0	0	0	0	0	0	0	0	0	0	0
	1018	0	0	0	0	0	0	0	0	0	0	0	0	0	0	0	0	0	0	0	0									1018	0	0	0	0	0	0	0	0	0	0	0	0	0	0	0	0	0	0	0
	1019	0	0	0	0	0	0	0	0	0	0	0	0	0	0	0	0	0	0	0	0									1019	0	0	0	0	0	0	0	0	0	0	0	0	0	0	0	0	0	0	0
	1020	0	0	0	0	0	0	0	0	0	0	0	0	0	0	0	0	0	0	0	0									1020	0	0	0	0	0	0	0	0	0	0	0	0	0	0	0	0	0	0	0
	1021	0	0	0	0	0	0	0	0	0	0	0	0	0	0	0	0	0	0	0	0									1021	0	0	0	0	0	0	0	0	0	0	0	0	0	0	0	0	0	0	0
	1022	0	0	0	0	0	0	0	0	0	0	0	0	0	0	0	0	0	0	0	0									1022	0	0	0	0	0	0	0	0	0	0	0	0	0	0	0	0	0	0	0
	1023	0	0	0	0	0	0	0	0	0	0	0	0	0	0	0	0	0	0	0	0									1023	0	0	0	0	0	0	0	0	0	0	0	0	0	0	0	0	0	0	0
	1024	0	0	0	0	0	0	0	0	0	0	0	0	0	0	0	0	0	0	0	0									1024	0	0	0	0	0	0	0	0	0	0	0	0	0	0	0	0	0	0	0
	1025	0	0	0	0	0	0	0	0	0	0	0	0	0	0	0	0	0	0	0	0									1025	0	0	0	0	0	0	0	0	0	0	0	0	0	0	0	0	0	0	0
	1026	0	0	0	0	0	0	0	0	0	0	0	0	0	0	0	0	0	0	0	0									1026	0	0	0	0	0	0	0	0	0	0	0	0	0	0	0	0	0	0	0
	1027	0	0	0	0	0	0	0	0	0	0	0	0	0	0	0	0	0	0	0	0									1027	0	0	0	0	0	0	0	0	0	0	0	0	0	0	0	0	0	0	0
	1028	0	0	0	0	0	0	0	0	0	0	0	0	0	0	0	0	0	0	0	0									1028	0	0	0	0	0	0	0	0	0	0	0	0	0	0	0	0	0	0	0
	1029	0	0	0	0	0	0	0	0	0	0	0	0	0	0	0	0	0	0	0	0									1029	0	0	0	0	0	0	0	0	0	0	0	0	0	0	0	0	0	0	0
	1030	0	0	0	0	0	0	0	0	0	0	0	0	0	0	0	0	0	0	0	0									1030	0	0	0	0	0	0	0	0	0	0	0	0	0	0	0	0	0	0	0
	1031	0	0	0	0	0	0	0	0	0	0	0	0	0	0	0	0	0	0	0	0									1031	0	0	0	0	0	0	0	0	0	0	0	0	0	0	0	0	0	0	0
	1032	0	0	0	0	0	0	0	0	0	0	0	0	0	0	0	0	0	0	0	0									1032	0	0	0	0	0	0	0	0	0	0	0	0	0	0	0	0	0	0	0
	1033	0	0	0	0	0	0	0	0	0	0	0	0	0	0	0	0	0	0	0	0									1033	0	0	0	0	0	0	0	0	0	0	0	0	0	0	0	0	0	0	0
	1034	0	0	0	0	0	0	0	0	0	0	0	0	0	0	0	0	0	0	0	0									1034	0	0	0	0	0	0	0	0	0	0	0	0	0	0	0	0	0	0	0
	1035	0	0	0	0	0	0	0	0	0	0	0	0	0	0	0	0	0	0	0	0									1035	0	0	0	0	0	0	0	0	0	0	0	0	0	0	0	0	0	0	0
	1036	0	0	0	0	0	0	0	0	0	0	0	0	0	0	0	0	0	0	0	0									1036	0	0	0	0	0	0	0	0	0	0	0	0	0	0	0	0	0	0	0
	1037	0	0	0	0	0	0	0	0	0	0	0	0	0	0	0	0	0	0	0	0									1037	0	0	0	0	0	0	0	0	0	0	0	0	0	0	0	0	0	0	0
	1038	0	0	0	0	0	0	0	0	0	0	0	0	0	0	0	0	0	0	0	0									1038	0	0	0	0	0	0	0	0	0	0	0	0	0	0	0	0	0	0	0
	1039	0	0	0	0	0	0	0	0	0	0	0	0	0	0	0	0	0	0	0	0									1039	0	0	0	0	0	0	0	0	0	0	0	0	0	0	0	0	0	0	0
	1040	0	0	0	0	0	0	0	0	0	0	0	0	0	0	0	0	0	0	0	0									1040	0	0	0	0	0	0	0	0	0	0	0	0	0	0	0	0	0	0	0
	1041	0	0	0	0	0	0	0	0	0	0	0	0	0	0	0	0	0	0	0	0									1041	0	0	0	0	0	0	0	0	0	0	0	0	0	0	0	0	0	0	0
	1042	0	0	0	0	0	0	0	0	0	0	0	0	0	0	0	0	0	0	0	0									1042	0	0	0	0	0	0	0	0	0	0	0	0	0	0	0	0	0	0	0
	1043	0	0	0	0	0	0	0	0	0	0	0	0	0	0	0	0	0	0	0	0									1043	0	0	0	0	0	0	0	0	0	0	0	0	0	0	0	0	0	0	0
	1044	0	0	0	0	0	0	0	0	0	0	0	0	0	0	0	0	0	0	0	0									1044	0	0	0	0	0	0	0	0	0	0	0	0	0	0	0	0	0	0	0
	1045	0	0	0	0	0	0	0	0	0	0	0	0	0	0	0	0	0	0	0	0									1045	0	0	0	0	0	0	0	0	0	0	0	0	0	0	0	0	0	0	0
	1046	0	0	0	0	0	0	0	0	0	0	0	0	0	0	0	0	0	0	0	0									1046	0	0	0	0	0	0	0	0	0	0	0	0	0	0	0	0	0	0	0
	1047	0	0	0	0	0	0	0	0	0	0	0	0	0	0	0	0	0	0	0	0									1047	0	0	0	0	0	0	0	0	0	0	0	0	0	0	0	0	0	0	0
	1048	0	0	0	0	0	0	0	0	0	0	0	0	0	0	0	0	0	0	0	0									1048	0	0	0	0	0	0	0	0	0	0	0	0	0	0	0	0	0	0	0
	1049	0	0	0	0	0	0	0	0	0	0	0	0	0	0	0	0	0	0	0	0									1049	0	0	0	0	0	0	0	0	0	0	0	0	0	0	0	0	0	0	0
	1050	0	0	0	0	0	0	0	0	0	0	0	0	0	0	0	0	0	0	0	0									1050	0	0	0	0	0	0	0	0	0	0	0	0	0	0	0	0	0	0	0
	1051	0	0	0	0	0	0	0	0	0	0	0	0	0	0	0	0	0	0	0	0									1051	0	0	0	0	0	0	0	0	0	0	0	0	0	0	0	0	0	0	0
	1052	0	0	0	0	0	0	0	0	0	0	0	0	0	0	0	0	0	0	0	0									1052	0	0	0	0	0	0	0	0	0	0	0	0	0	0	0	0	0	0	0
	1053	0	0	0	0	0	0	0	0	0	0	0	0	0	0	0	0	0	0	0	0									1053	0	0	0	0	0	0	0	0	0	0	0	0	0	0	0	0	0	0	0
	1054	0	0	0	0	0	0	0	0	0	0	0	0	0	0	0	0	0	0	0	0									1054	0	0	0	0	0	0	0	0	0	0	0	0	0	0	0	0	0	0	0
	1055	0	0	0	0	0	0	0	0	0	0	0	0	0	0	0	0	0	0	0	0									1055	0	0	0	0	0	0	0	0	0	0	0	0	0	0	0	0	0	0	0
	1056	0	0	0	0	0	0	0	0	0	0	0	0	0	0	0	0	0	0	0	0									1056	0	0	0	0	0	0	0	0	0	0	0	0	0	0	0	0	0	0	0
	1057	0	0	0	0	0	0	0	0	0	0	0	0	0	0	0	0	0	0	0	0									1057	0	0	0	0	0	0	0	0	0	0	0	0	0	0	0	0	0	0	0
	1058	0	0	0	0	0	0	0	0	0	0	0	0	0	0	0	0	0	0	0	0									1058	0	0	0	0	0	0	0	0	0	0	0	0	0	0	0	0	0	0	0
	1059	0	0	0	0	0	0	0	0	0	0	0	0	0	0	0	0	0	0	0	0									1059	0	0	0	0	0	0	0	0	0	0	0	0	0	0	0	0	0	0	0
	1060	0	0	0	0	0	0	0	0	0	0	0	0	0	0	0	0	0	0	0	0									1060	0	0	0	0	0	0	0	0	0	0	0	0	0	0	0	0	0	0	0
	1061	0	0	0	0	0	0	0	0	0	0	0	0	0	0	0	0	0	0	0	0									1061	0	0	0	0	0	0	0	0	0	0	0	0	0	0	0	0	0	0	0
	1062	0	0	0	0	0	0	0	0	0	0	0	0	0	0	0	0	0	0	0	0									1062	0	0	0	0	0	0	0	0	0	0	0	0	0	0	0	0	0	0	0
	1063	0	0	0	0	0	0	0	0	0	0	0	0	0	0	0	0	0	0	0	0									1063	0	0	0	0	0	0	0	0	0	0	0	0	0	0	0	0	0	0	0
	1064	0	0	0	0	0	0	0	0	0	0	0	0	0	0	0	0	0	0	0	0									1064	0	0	0	0	0	0	0	0	0	0	0	0	0	0	0	0	0	0	0
	1065	0	0	0	0	0	0	0	0	0	0	0	0	0	0	0	0	0	0	0	0									1065	0	0	0	0	0	0	0	0	0	0	0	0	0	0	0	0	0	0	0
	1066	0	0	0	0	0	0	0	0	0	0	0	0	0	0	0	0	0	0	0	0									1066	0	0	0	0	0	0	0	0	0	0	0	0	0	0	0	0	0	0	0
	1067	0	0	0	0	0	0	0	0	0	0	0	0	0	0	0	0	0	0	0	0									1067	0	0	0	0	0	0	0	0	0	0	0	0	0	0	0	0	0	0	0
	1068	0	0	0	0	0	0	0	0	0	0	0	0	0	0	0	0	0	0	0	0									1068	0	0	0	0	0	0	0	0	0	0	0	0	0	0	0	0	0	0	0
	1069	0	0	0	0	0	0	0	0	0	0	0	0	0	0	0	0	0	0	0	0									1069	0	0	0	0	0	0	0	0	0	0	0	0	0	0	0	0	0	0	0
	1070	0	0	0	0	0	0	0	0	0	0	0	0	0	0	0	0	0	0	0	0
	1071	0	0	0	0	0	0	0	0	0	0	0	0	0	0	0	0	0	0	0	0
	1072	0	0	0	0	0	0	0	0	0	0	0	0	0	0	0	0	0	0	0	0
	1073	0	0	0	0	0	0	0	0	0	0	0	0	0	0	0	0	0	0	0	0
	1074	0	0	0	0	0	0	0	0	0	0	0	0	0	0	0	0	0	0	0	0
	1075	0	0	0	0	0	0	0	0	0	0	0	0	0	0	0	0	0	0	0	0
	1076	0	0	0	0	0	0	0	0	0	0	0	0	0	0	0	0	0	0	0	0
	1077	0	0	0	0	0	0	0	0	0	0	0	0	0	0	0	0	0	0	0	0
	1078	0	0	0	0	0	0	0	0	0	0	0	0	0	0	0	0	0	0	0	0
	1079	0	0	0	0	0	0	0	0	0	0	0	0	0	0	0	0	0	0	0	0
	1080	0	0	0	0	0	0	0	0	0	0	0	0	0	0	0	0	0	0	0	0
	1081	0	0	0	0	0	0	0	0	0	0	0	0	0	0	0	0	0	0	0	0
	1082	0	0	0	0	0	0	0	0	0	0	0	0	0	0	0	0	0	0	0	0
	1083	0	0	0	0	0	0	0	0	0	0	0	0	0	0	0	0	0	0	0	0
	1084	0	0	0	0	0	0	0	0	0	0	0	0	0	0	0	0	0	0	0	0
	1085	0	0	0	0	0	0	0	0	0	0	0	0	0	0	0	0	0	0	0	0
	1086	0	0	0	0	0	0	0	0	0	0	0	0	0	0	0	0	0	0	0	0
	1087	0	0	0	0	0	0	0	0	0	0	0	0	0	0	0	0	0	0	0	0
	1088	0	0	0	0	0	0	0	0	0	0	0	0	0	0	0	0	0	0	0	0
	1089	0	0	0	0	0	0	0	0	0	0	0	0	0	0	0	0	0	0	0	0
	1090	0	0	0	0	0	0	0	0	0	0	0	0	0	0	0	0	0	0	0	0
	1091	0	0	0	0	0	0	0	0	0	0	0	0	0	0	0	0	0	0	0	0
	1092	0	0	0	0	0	0	0	0	0	0	0	0	0	0	0	0	0	0	0	0
	1093	0	0	0	0	0	0	0	0	0	0	0	0	0	0	0	0	0	0	0	0
	1094	0	0	0	0	0	0	0	0	0	0	0	0	0	0	0	0	0	0	0	0
	1095	0	0	0	0	0	0	0	0	0	0	0	0	0	0	0	0	0	0	0	0
	1096	0	0	0	0	0	0	0	0	0	0	0	0	0	0	0	0	0	0	0	0
	1097	0	0	0	0	0	0	0	0	0	0	0	0	0	0	0	0	0	0	0	0
	1098	0	0	0	0	0	0	0	0	0	0	0	0	0	0	0	0	0	0	0	0
	1099	0	0	0	0	0	0	0	0	0	0	0	0	0	0	0	0	0	0	0	0
	1100	0	0	0	0	0	0	0	0	0	0	0	0	0	0	0	0	0	0	0	0
	1101	0	0	0	0	0	0	0	0	0	0	0	0	0	0	0	0	0	0	0	0
	1102	0	0	0	0	0	0	0	0	0	0	0	0	0	0	0	0	0	0	0	0
	1103	0	0	0	0	0	0	0	0	0	0	0	0	0	0	0	0	0	0	0	0
	1104	0	0	0	0	0	0	0	0	0	0	0	0	0	0	0	0	0	0	0	0
	1105	0	0	0	0	0	0	0	0	0	0	0	0	0	0	0	0	0	0	0	0
	1106	0	0	0	0	0	0	0	0	0	0	0	0	0	0	0	0	0	0	0	0
	1107	0	0	0	0	0	0	0	0	0	0	0	0	0	0	0	0	0	0	0	0
	1108	0	0	0	0	0	0	0	0	0	0	0	0	0	0	0	0	0	0	0	0
	1109	0	0	0	0	0	0	0	0	0	0	0	0	0	0	0	0	0	0	0	0
	1110	0	0	0	0	0	0	0	0	0	0	0	0	0	0	0	0	0	0	0	0
	1111	0	0	0	0	0	0	0	0	0	0	0	0	0	0	0	0	0	0	0	0
	1112	0	0	0	0	0	0	0	0	0	0	0	0	0	0	0	0	0	0	0	0
	1113	0	0	0	0	0	0	0	0	0	0	0	0	0	0	0	0	0	0	0	0
	1114	0	0	0	0	0	0	0	0	0	0	0	0	0	0	0	0	0	0	0	0
	1115	0	0	0	0	0	0	0	0	0	0	0	0	0	0	0	0	0	0	0	0
	1116	0	0	0	0	0	0	0	0	0	0	0	0	0	0	0	0	0	0	0	0
	1117	0	0	0	0	0	0	0	0	0	0	0	0	0	0	0	0	0	0	0	0
	1118	0	0	0	0	0	0	0	0	0	0	0	0	0	0	0	0	0	0	0	0
	1119	0	0	0	0	0	0	0	0	0	0	0	0	0	0	0	0	0	0	0	0
	1120	0	0	0	0	0	0	0	0	0	0	0	0	0	0	0	0	0	0	0	0
	1121	0	0	0	0	0	0	0	0	0	0	0	0	0	0	0	0	0	0	0	0
	1122	0	0	0	0	0	0	0	0	0	0	0	0	0	0	0	0	0	0	0	0
	1123	0	0	0	0	0	0	0	0	0	0	0	0	0	0	0	0	0	0	0	0
	1124	0	0	0	0	0	0	0	0	0	0	0	0	0	0	0	0	0	0	0	0
	1125	0	0	0	0	0	0	0	0	0	0	0	0	0	0	0	0	0	0	0	0
	1126	0	0	0	0	0	0	0	0	0	0	0	0	0	0	0	0	0	0	0	0
	1127	0	0	0	0	0	0	0	0	0	0	0	0	0	0	0	0	0	0	0	0
	1128	0	0	0	0	0	0	0	0	0	0	0	0	0	0	0	0	0	0	0	0
	1129	0	0	0	0	0	0	0	0	0	0	0	0	0	0	0	0	0	0	0	0
	1130	0	0	0	0	0	0	0	0	0	0	0	0	0	0	0	0	0	0	0	0
	1131	0	0	0	0	0	0	0	0	0	0	0	0	0	0	0	0	0	0	0	0
	1132	0	0	0	0	0	0	0	0	0	0	0	0	0	0	0	0	0	0	0	0
	1133	0	0	0	0	0	0	0	0	0	0	0	0	0	0	0	0	0	0	0	0
	1134	0	0	0	0	0	0	0	0	0	0	0	0	0	0	0	0	0	0	0	0
	1135	0	0	0	0	0	0	0	0	0	0	0	0	0	0	0	0	0	0	0	0
	1136	0	0	0	0	0	0	0	0	0	0	0	0	0	0	0	0	0	0	0	0
	1137	0	0	0	0	0	0	0	0	0	0	0	0	0	0	0	0	0	0	0	0
	1138	0	0	0	0	0	0	0	0	0	0	0	0	0	0	0	0	0	0	0	0
	1139	0	0	0	0	0	0	0	0	0	0	0	0	0	0	0	0	0	0	0	0
	1140	0	0	0	0	0	0	0	0	0	0	0	0	0	0	0	0	0	0	0	0
	1141	0	0	0	0	0	0	0	0	0	0	0	0	0	0	0	0	0	0	0	0
	1142	0	0	0	0	0	0	0	0	0	0	0	0	0	0	0	0	0	0	0	0
	1143	0	0	0	0	0	0	0	0	0	0	0	0	0	0	0	0	0	0	0	0
	1144	0	0	0	0	0	0	0	0	0	0	0	0	0	0	0	0	0	0	0	0
	1145	0	0	0	0	0	0	0	0	0	0	0	0	0	0	0	0	0	0	0	0
	1146	0	0	0	0	0	0	0	0	0	0	0	0	0	0	0	0	0	0	0	0
	1147	0	0	0	0	0	0	0	0	0	0	0	0	0	0	0	0	0	0	0	0
	1148	0	0	0	0	0	0	0	0	0	0	0	0	0	0	0	0	0	0	0	0
	1149	0	0	0	0	0	0	0	0	0	0	0	0	0	0	0	0	0	0	0	0
	1150	0	0	0	0	0	0	0	0	0	0	0	0	0	0	0	0	0	0	0	0
	1151	0	0	0	0	0	0	0	0	0	0	0	0	0	0	0	0	0	0	0	0
	1152	0	0	0	0	0	0	0	0	0	0	0	0	0	0	0	0	0	0	0	0
	1153	0	0	0	0	0	0	0	0	0	0	0	0	0	0	0	0	0	0	0	0
	1154	0	0	0	0	0	0	0	0	0	0	0	0	0	0	0	0	0	0	0	0
	1155	0	0	0	0	0	0	0	0	0	0	0	0	0	0	0	0	0	0	0	0
	1156	0	0	0	0	0	0	0	0	0	0	0	0	0	0	0	0	0	0	0	0
	1157	0	0	0	0	0	0	0	0	0	0	0	0	0	0	0	0	0	0	0	0
	1158	0	0	0	0	0	0	0	0	0	0	0	0	0	0	0	0	0	0	0	0
	1159	0	0	0	0	0	0	0	0	0	0	0	0	0	0	0	0	0	0	0	0
	1160	0	0	0	0	0	0	0	0	0	0	0	0	0	0	0	0	0	0	0	0
	1161	0	0	0	0	0	0	0	0	0	0	0	0	0	0	0	0	0	0	0	0
	1162	0	0	0	0	0	0	0	0	0	0	0	0	0	0	0	0	0	0	0	0
	1163	0	0	0	0	0	0	0	0	0	0	0	0	0	0	0	0	0	0	0	0
	1164	0	0	0	0	0	0	0	0	0	0	0	0	0	0	0	0	0	0	0	0
	1165	0	0	0	0	0	0	0	0	0	0	0	0	0	0	0	0	0	0	0	0
	1166	0	0	0	0	0	0	0	0	0	0	0	0	0	0	0	0	0	0	0	0
	1167	0	0	0	0	0	0	0	0	0	0	0	0	0	0	0	0	0	0	0	0
	1168	0	0	0	0	0	0	0	0	0	0	0	0	0	0	0	0	0	0	0	0
	1169	0	0	0	0	0	0	0	0	0	0	0	0	0	0	0	0	0	0	0	0
	1170	0	0	0	0	0	0	0	0	0	0	0	0	0	0	0	0	0	0	0	0
	1171	0	0	0	0	0	0	0	0	0	0	0	0	0	0	0	0	0	0	0	0
	1172	0	0	0	0	0	0	0	0	0	0	0	0	0	0	0	0	0	0	0	0
	1173	0	0	0	0	0	0	0	0	0	0	0	0	0	0	0	0	0	0	0	0
	1174	0	0	0	0	0	0	0	0	0	0	0	0	0	0	0	0	0	0	0	0
	1175	0	0	0	0	0	0	0	0	0	0	0	0	0	0	0	0	0	0	0	0
	1176	0	0	0	0	0	0	0	0	0	0	0	0	0	0	0	0	0	0	0	0
	1177	0	0	0	0	0	0	0	0	0	0	0	0	0	0	0	0	0	0	0	0
	1178	0	0	0	0	0	0	0	0	0	0	0	0	0	0	0	0	0	0	0	0
	1179	0	0	0	0	0	0	0	0	0	0	0	0	0	0	0	0	0	0	0	0
	1180	0	0	0	0	0	0	0	0	0	0	0	0	0	0	0	0	0	0	0	0
	1181	0	0	0	0	0	0	0	0	0	0	0	0	0	0	0	0	0	0	0	0
	1182	0	0	0	0	0	0	0	0	0	0	0	0	0	0	0	0	0	0	0	0
	1183	0	0	0	0	0	0	0	0	0	0	0	0	0	0	0	0	0	0	0	0
	1184	0	0	0	0	0	0	0	0	0	0	0	0	0	0	0	0	0	0	0	0
	1185	0	0	0	0	0	0	0	0	0	0	0	0	0	0	0	0	0	0	0	0
	1186	0	0	0	0	0	0	0	0	0	0	0	0	0	0	0	0	0	0	0	0
	1187	0	0	0	0	0	0	0	0	0	0	0	0	0	0	0	0	0	0	0	0
	1188	0	0	0	0	0	0	0	0	0	0	0	0	0	0	0	0	0	0	0	0
	1189	0	0	0	0	0	0	0	0	0	0	0	0	0	0	0	0	0	0	0	0
	1190	0	0	0	0	0	0	0	0	0	0	0	0	0	0	0	0	0	0	0	0
	1191	0	0	0	0	0	0	0	0	0	0	0	0	0	0	0	0	0	0	0	0
	1192	0	0	0	0	0	0	0	0	0	0	0	0	0	0	0	0	0	0	0	0
	1193	0	0	0	0	0	0	0	0	0	0	0	0	0	0	0	0	0	0	0	0
	1194	0	0	0	0	0	0	0	0	0	0	0	0	0	0	0	0	0	0	0	0
	1195	0	0	0	0	0	0	0	0	0	0	0	0	0	0	0	0	0	0	0	0
	1196	0	0	0	0	0	0	0	0	0	0	0	0	0	0	0	0	0	0	0	0
	1197	0	0	0	0	0	0	0	0	0	0	0	0	0	0	0	0	0	0	0	0
	1198	0	0	0	0	0	0	0	0	0	0	0	0	0	0	0	0	0	0	0	0
	1199	0	0	0	0	0	0	0	0	0	0	0	0	0	0	0	0	0	0	0	0
	1200	0	0	0	0	0	0	0	0	0	0	0	0	0	0	0	0	0	0	0	0
	1201	0	0	0	0	0	0	0	0	0	0	0	0	0	0	0	0	0	0	0	0
	1202	0	0	0	0	0	0	0	0	0	0	0	0	0	0	0	0	0	0	0	0
	1203	0	0	0	0	0	0	0	0	0	0	0	0	0	0	0	0	0	0	0	0
	1204	0	0	0	0	0	0	0	0	0	0	0	0	0	0	0	0	0	0	0	0
	1205	0	0	0	0	0	0	0	0	0	0	0	0	0	0	0	0	0	0	0	0
	1206	0	0	0	0	0	0	0	0	0	0	0	0	0	0	0	0	0	0	0	0
	1207	0	0	0	0	0	0	0	0	0	0	0	0	0	0	0	0	0	0	0	0
	1208	0	0	0	0	0	0	0	0	0	0	0	0	0	0	0	0	0	0	0	0
	1209	0	0	0	0	0	0	0	0	0	0	0	0	0	0	0	0	0	0	0	0
	1210	0	0	0	0	0	0	0	0	0	0	0	0	0	0	0	0	0	0	0	0
	1211	0	0	0	0	0	0	0	0	0	0	0	0	0	0	0	0	0	0	0	0
	1212	0	0	0	0	0	0	0	0	0	0	0	0	0	0	0	0	0	0	0	0
	1213	0	0	0	0	0	0	0	0	0	0	0	0	0	0	0	0	0	0	0	0										0	0	0	0	0	0	0	0	0	0	0	0	0	0	0	0	0	0	0
	1214	0	0	0	0	0	0	0	0	0	0	0	0	0	0	0	0	0	0	0	0										0	0	0	0	0	0	0	0	0	0	0	0	0	0	0	0	0	0	0
	1215	0	0	0	0	0	0	0	0	0	0	0	0	0	0	0	0	0	0	0	0										0	0	0	0	0	0	0	0	0	0	0	0	0	0	0	0	0	0	0
	1216	0	0	0	0	0	0	0	0	0	0	0	0	0	0	0	0	0	0	0	0										0	0	0	0	0	0	0	0	0	0	0	0	0	0	0	0	0	0	0
	1217	0	0	0	0	0	0	0	0	0	0	0	0	0	0	0	0	0	0	0	0										0	0	0	0	0	0	0	0	0	0	0	0	0	0	0	0	0	0	0
																															0	0	0	0	0	0	0	0	0	0	0	0	0	0	0	0	0	0	0
SUM	609	2917	2926	2901	2908	2941	2926	2901	2908	2901	2941	2941	2926	0	0	0	0	0	0	0	0									571915	36020	36038	35972	35984	36140	36074	35908	35948	35876	36260	36284	36128	0	0	0	0	0	0	0
CN X SUM OF ELEM.		37921	38038	37713	37804	38233	38038	37713	37804	37713	38233	38233	38038	0	0	0	0	0	0	0	0
		7	8	9	10	11	12	13	14	15	16	17	18	19	20	21	22	23	24	25	26
	SC	1.05278	1.0555	1.0484	1.05058	1.05791	1.05444	1.05027	1.05163	1.0512	1.05441	1.05372	1.05287	#DIV/0!	#DIV/0!	#DIV/0!	#DIV/0!	#DIV/0!	#DIV/0!	#DIV/0!	#DIV/0!
[truncated: 3 more columns]

## Sheet: D01 (Unaligned seq.)
	OPTINALYSIS: SEQUENCE ANALYSIS THROUGH A LOOKING-GLASS
	CN = Central node; Kc = Kabirian coefficient of similarity; %Sim. = Percentage similarity; %Dsim. = Percentage dissimilarity																NUM. = Numeration; DEN. = Denumeration
				For Kc >1		For Kc <1
	RESULTS	CN	Kc	%Sim.	%Dsim.	%Sim.	%Dsim.										NUM	DEN		NUM	DEN
	D1	13	0.932985	1.33551	-0.33551	0.748777	0.251223										1.06701	0.798956		-0.798956	-1.06701
	D2	13	0.942275	1.27926	-0.279259	0.781702	0.218298										1.05772	0.826826		-0.826826	-1.05772
	D3	13	0.939257	1.29711	-0.297115	0.770942	0.229058										1.06074	0.817771		-0.817771	-1.06074
	D4	13	0.945718	1.25936	-0.259364	0.794052	0.205948										1.05428	0.837154		-0.837154	-1.05428
	D5	13	0.952995	1.21889	-0.218886	0.820421	0.179579										1.04701	0.858985		-0.858985	-1.04701
	D6	13	0.952918	1.21931	-0.219305	0.820139	0.179861										1.04708	0.858753		-0.858753	-1.04708
	D7	13	0.952056	1.22399	-0.223991	0.817	0.183										1.04794	0.856169		-0.856169	-1.04794
	D8	13	0.957246	1.19618	-0.196178	0.835996	0.164004										1.04275	0.871738		-0.871738	-1.04275
	D9	13	0.958588	1.18915	-0.189147	0.840939	0.159061										1.04141	0.875764		-0.875764	-1.04141
	D10	13	0.964942	1.15671	-0.156712	0.864519	0.135481										1.03506	0.894827		-0.894827	-1.03506
	D11	13	0.967368	1.14469	-0.144693	0.873596	0.126404										1.03263	0.902104		-0.902104	-1.03263
	D12	13	0.96934	1.13506	-0.135064	0.881008	0.118992										1.03066	0.90802		-0.90802	-1.03066
	X	13	#DIV/0!	#DIV/0!	#DIV/0!	#DIV/0!	#DIV/0!										#DIV/0!	#DIV/0!		#DIV/0!	#DIV/0!
	X	13	#DIV/0!	#DIV/0!	#DIV/0!	#DIV/0!	#DIV/0!										#DIV/0!	#DIV/0!		#DIV/0!	#DIV/0!
	X	13	#DIV/0!	#DIV/0!	#DIV/0!	#DIV/0!	#DIV/0!										#DIV/0!	#DIV/0!		#DIV/0!	#DIV/0!
	X	13	#DIV/0!	#DIV/0!	#DIV/0!	#DIV/0!	#DIV/0!										#DIV/0!	#DIV/0!		#DIV/0!	#DIV/0!
	X	13	#DIV/0!	#DIV/0!	#DIV/0!	#DIV/0!	#DIV/0!										#DIV/0!	#DIV/0!		#DIV/0!	#DIV/0!
	X	13	#DIV/0!	#DIV/0!	#DIV/0!	#DIV/0!	#DIV/0!										#DIV/0!	#DIV/0!		#DIV/0!	#DIV/0!
	X	13	#DIV/0!	#DIV/0!	#DIV/0!	#DIV/0!	#DIV/0!										#DIV/0!	#DIV/0!		#DIV/0!	#DIV/0!
	X	13	#DIV/0!	#DIV/0!	#DIV/0!	#DIV/0!	#DIV/0!										#DIV/0!	#DIV/0!		#DIV/0!	#DIV/0!
	SEQUENCES	INPUT SEQUENCE																												SEQUENCES	COMPUTATION AND CALCULATIONS
	QUANTITATIVE SCALE	D1	D2	D3	D4	D5	D6	D7	D8	D9	D10	D11	D12	X	X	X	X	X	X	X	X									QUANTITATIVE SCALE	D1	D2	D3	D4	D5	D6	D7	D8	D9	D10	D11	D12	X	X	X	X	X	X	X
	1	0	151	151	151	151	151	151	151	151	151	151	151	0	0	0	0	0	0	0	0									1	0	151	151	151	151	151	151	151	151	151	151	151	0	0	0	0	0	0	0
	2	126	0	126	126	126	126	126	126	126	126	126	126	0	0	0	0	0	0	0	0									2	252	0	252	252	252	252	252	252	252	252	252	252	0	0	0	0	0	0	0
	3	151	151	0	151	151	151	151	151	151	151	151	151	0	0	0	0	0	0	0	0									3	453	453	0	453	453	453	453	453	453	453	453	453	0	0	0	0	0	0	0
	4	135	135	135	0	135	135	135	135	135	135	135	135	0	0	0	0	0	0	0	0									4	540	540	540	0	540	540	540	540	540	540	540	540	0	0	0	0	0	0	0
	5	111	111	111	111	0	111	111	111	111	111	111	111	0	0	0	0	0	0	0	0									5	555	555	555	555	0	555	555	555	555	555	555	555	0	0	0	0	0	0	0
	6	126	126	126	126	126	0	126	126	126	126	126	126	0	0	0	0	0	0	0	0									6	756	756	756	756	756	0	756	756	756	756	756	756	0	0	0	0	0	0	0
	7	151	151	151	151	151	151	0	151	151	151	151	151	0	0	0	0	0	0	0	0									7	1057	1057	1057	1057	1057	1057	0	1057	1057	1057	1057	1057	0	0	0	0	0	0	0
	8	135	135	135	135	135	135	135	0	135	135	135	135	0	0	0	0	0	0	0	0									8	1080	1080	1080	1080	1080	1080	1080	0	1080	1080	1080	1080	0	0	0	0	0	0	0
	9	151	151	151	151	151	151	151	151	0	151	151	151	0	0	0	0	0	0	0	0									9	1359	1359	1359	1359	1359	1359	1359	1359	0	1359	1359	1359	0	0	0	0	0	0	0
	10	111	111	111	111	111	111	111	111	111	0	111	111	0	0	0	0	0	0	0	0									10	1110	1110	1110	1110	1110	1110	1110	1110	1110	0	1110	1110	0	0	0	0	0	0	0
	11	111	111	111	111	111	111	111	111	111	111	0	111	0	0	0	0	0	0	0	0									11	1221	1221	1221	1221	1221	1221	1221	1221	1221	1221	0	1221	0	0	0	0	0	0	0
	12	126	126	126	126	126	126	126	126	126	126	126	0	0	0	0	0	0	0	0	0									12	1512	1512	1512	1512	1512	1512	1512	1512	1512	1512	1512	0	0	0	0	0	0	0	0
	13	0	0	0	0	0	0	0	0	0	0	0	0	0	0	0	0	0	0	0	0									13	0	0	0	0	0	0	0	0	0	0	0	0	0	0	0	0	0	0	0
	14	151	151	151	151	151	151	151	151	151	151	151	151	0	0	0	0	0	0	0	0									14	2114	2114	2114	2114	2114	2114	2114	2114	2114	2114	2114	2114	0	0	0	0	0	0	0
	15	151	151	151	151	151	151	151	151	151	151	151	151	0	0	0	0	0	0	0	0									15	2265	2265	2265	2265	2265	2265	2265	2265	2265	2265	2265	2265	0	0	0	0	0	0	0
	16	151	151	151	151	151	151	151	151	151	151	151	151	0	0	0	0	0	0	0	0									16	2416	2416	2416	2416	2416	2416	2416	2416	2416	2416	2416	2416	0	0	0	0	0	0	0
	17	151	151	151	151	151	151	151	151	151	151	151	151	0	0	0	0	0	0	0	0									17	2567	2567	2567	2567	2567	2567	2567	2567	2567	2567	2567	2567	0	0	0	0	0	0	0
	18	151	151	151	151	151	151	151	151	151	151	151	151	0	0	0	0	0	0	0	0									18	2718	2718	2718	2718	2718	2718	2718	2718	2718	2718	2718	2718	0	0	0	0	0	0	0
	19	151	151	151	151	151	151	151	151	151	151	151	151	0	0	0	0	0	0	0	0									19	2869	2869	2869	2869	2869	2869	2869	2869	2869	2869	2869	2869	0	0	0	0	0	0	0
	20	151	151	151	151	151	151	151	151	151	151	151	151	0	0	0	0	0	0	0	0									20	3020	3020	3020	3020	3020	3020	3020	3020	3020	3020	3020	3020	0	0	0	0	0	0	0
	21	151	151	151	151	151	151	151	151	151	151	151	151	0	0	0	0	0	0	0	0									21	3171	3171	3171	3171	3171	3171	3171	3171	3171	3171	3171	3171	0	0	0	0	0	0	0
	22	151	151	151	151	151	151	151	151	151	151	151	151	0	0	0	0	0	0	0	0									22	3322	3322	3322	3322	3322	3322	3322	3322	3322	3322	3322	3322	0	0	0	0	0	0	0
	23	151	151	151	151	151	151	151	151	151	151	151	151	0	0	0	0	0	0	0	0									23	3473	3473	3473	3473	3473	3473	3473	3473	3473	3473	3473	3473	0	0	0	0	0	0	0
	24	151	151	151	151	151	151	151	151	151	151	151	151	0	0	0	0	0	0	0	0									24	3624	3624	3624	3624	3624	3624	3624	3624	3624	3624	3624	3624	0	0	0	0	0	0	0
	25	151	151	151	151	151	151	151	151	151	151	151	151	0	0	0	0	0	0	0	0									25	3775	3775	3775	3775	3775	3775	3775	3775	3775	3775	3775	3775	0	0	0	0	0	0	0
	26	0	0	0	0	0	0	0	0	0	0	0	0	0	0	0	0	0	0	0	0									26	0	0	0	0	0	0	0	0	0	0	0	0	0	0	0	0	0	0	0
	27	0	0	0	0	0	0	0	0	0	0	0	0	0	0	0	0	0	0	0	0									27	0	0	0	0	0	0	0	0	0	0	0	0	0	0	0	0	0	0	0
	28	0	0	0	0	0	0	0	0	0	0	0	0	0	0	0	0	0	0	0	0									28	0	0	0	0	0	0	0	0	0	0	0	0	0	0	0	0	0	0	0
	29	0	0	0	0	0	0	0	0	0	0	0	0	0	0	0	0	0	0	0	0									29	0	0	0	0	0	0	0	0	0	0	0	0	0	0	0	0	0	0	0
	30	0	0	0	0	0	0	0	0	0	0	0	0	0	0	0	0	0	0	0	0									30	0	0	0	0	0	0	0	0	0	0	0	0	0	0	0	0	0	0	0
	31	0	0	0	0	0	0	0	0	0	0	0	0	0	0	0	0	0	0	0	0									31	0	0	0	0	0	0	0	0	0	0	0	0	0	0	0	0	0	0	0
	32	0	0	0	0	0	0	0	0	0	0	0	0	0	0	0	0	0	0	0	0									32	0	0	0	0	0	0	0	0	0	0	0	0	0	0	0	0	0	0	0
	33	0	0	0	0	0	0	0	0	0	0	0	0	0	0	0	0	0	0	0	0									33	0	0	0	0	0	0	0	0	0	0	0	0	0	0	0	0	0	0	0
	34	0	0	0	0	0	0	0	0	0	0	0	0	0	0	0	0	0	0	0	0									34	0	0	0	0	0	0	0	0	0	0	0	0	0	0	0	0	0	0	0
	35	0	0	0	0	0	0	0	0	0	0	0	0	0	0	0	0	0	0	0	0									35	0	0	0	0	0	0	0	0	0	0	0	0	0	0	0	0	0	0	0
	36	0	0	0	0	0	0	0	0	0	0	0	0	0	0	0	0	0	0	0	0									36	0	0	0	0	0	0	0	0	0	0	0	0	0	0	0	0	0	0	0
	37	0	0	0	0	0	0	0	0	0	0	0	0	0	0	0	0	0	0	0	0									37	0	0	0	0	0	0	0	0	0	0	0	0	0	0	0	0	0	0	0
	38	0	0	0	0	0	0	0	0	0	0	0	0	0	0	0	0	0	0	0	0									38	0	0	0	0	0	0	0	0	0	0	0	0	0	0	0	0	0	0	0
	39	0	0	0	0	0	0	0	0	0	0	0	0	0	0	0	0	0	0	0	0									39	0	0	0	0	0	0	0	0	0	0	0	0	0	0	0	0	0	0	0
	40	0	0	0	0	0	0	0	0	0	0	0	0	0	0	0	0	0	0	0	0									40	0	0	0	0	0	0	0	0	0	0	0	0	0	0	0	0	0	0	0
	41	0	0	0	0	0	0	0	0	0	0	0	0	0	0	0	0	0	0	0	0									41	0	0	0	0	0	0	0	0	0	0	0	0	0	0	0	0	0	0	0
	42	0	0	0	0	0	0	0	0	0	0	0	0	0	0	0	0	0	0	0	0									42	0	0	0	0	0	0	0	0	0	0	0	0	0	0	0	0	0	0	0
	43	0	0	0	0	0	0	0	0	0	0	0	0	0	0	0	0	0	0	0	0									43	0	0	0	0	0	0	0	0	0	0	0	0	0	0	0	0	0	0	0
	44	0	0	0	0	0	0	0	0	0	0	0	0	0	0	0	0	0	0	0	0									44	0	0	0	0	0	0	0	0	0	0	0	0	0	0	0	0	0	0	0
	45	0	0	0	0	0	0	0	0	0	0	0	0	0	0	0	0	0	0	0	0									45	0	0	0	0	0	0	0	0	0	0	0	0	0	0	0	0	0	0	0
	46	0	0	0	0	0	0	0	0	0	0	0	0	0	0	0	0	0	0	0	0									46	0	0	0	0	0	0	0	0	0	0	0	0	0	0	0	0	0	0	0
	47	0	0	0	0	0	0	0	0	0	0	0	0	0	0	0	0	0	0	0	0									47	0	0	0	0	0	0	0	0	0	0	0	0	0	0	0	0	0	0	0
	48	0	0	0	0	0	0	0	0	0	0	0	0	0	0	0	0	0	0	0	0									48	0	0	0	0	0	0	0	0	0	0	0	0	0	0	0	0	0	0	0
	49	0	0	0	0	0	0	0	0	0	0	0	0	0	0	0	0	0	0	0	0									49	0	0	0	0	0	0	0	0	0	0	0	0	0	0	0	0	0	0	0
	50	0	0	0	0	0	0	0	0	0	0	0	0	0	0	0	0	0	0	0	0									50	0	0	0	0	0	0	0	0	0	0	0	0	0	0	0	0	0	0	0
	51	0	0	0	0	0	0	0	0	0	0	0	0	0	0	0	0	0	0	0	0									51	0	0	0	0	0	0	0	0	0	0	0	0	0	0	0	0	0	0	0
	52	0	0	0	0	0	0	0	0	0	0	0	0	0	0	0	0	0	0	0	0									52	0	0	0	0	0	0	0	0	0	0	0	0	0	0	0	0	0	0	0
	53	0	0	0	0	0	0	0	0	0	0	0	0	0	0	0	0	0	0	0	0									53	0	0	0	0	0	0	0	0	0	0	0	0	0	0	0	0	0	0	0
	54	0	0	0	0	0	0	0	0	0	0	0	0	0	0	0	0	0	0	0	0									54	0	0	0	0	0	0	0	0	0	0	0	0	0	0	0	0	0	0	0
	55	0	0	0	0	0	0	0	0	0	0	0	0	0	0	0	0	0	0	0	0									55	0	0	0	0	0	0	0	0	0	0	0	0	0	0	0	0	0	0	0
	56	0	0	0	0	0	0	0	0	0	0	0	0	0	0	0	0	0	0	0	0									56	0	0	0	0	0	0	0	0	0	0	0	0	0	0	0	0	0	0	0
	57	0	0	0	0	0	0	0	0	0	0	0	0	0	0	0	0	0	0	0	0									57	0	0	0	0	0	0	0	0	0	0	0	0	0	0	0	0	0	0	0
	58	0	0	0	0	0	0	0	0	0	0	0	0	0	0	0	0	0	0	0	0									58	0	0	0	0	0	0	0	0	0	0	0	0	0	0	0	0	0	0	0
	59	0	0	0	0	0	0	0	0	0	0	0	0	0	0	0	0	0	0	0	0									59	0	0	0	0	0	0	0	0	0	0	0	0	0	0	0	0	0	0	0
	60	0	0	0	0	0	0	0	0	0	0	0	0	0	0	0	0	0	0	0	0									60	0	0	0	0	0	0	0	0	0	0	0	0	0	0	0	0	0	0	0
	61	0	0	0	0	0	0	0	0	0	0	0	0	0	0	0	0	0	0	0	0									61	0	0	0	0	0	0	0	0	0	0	0	0	0	0	0	0	0	0	0
	62	0	0	0	0	0	0	0	0	0	0	0	0	0	0	0	0	0	0	0	0									62	0	0	0	0	0	0	0	0	0	0	0	0	0	0	0	0	0	0	0
	63	0	0	0	0	0	0	0	0	0	0	0	0	0	0	0	0	0	0	0	0									63	0	0	0	0	0	0	0	0	0	0	0	0	0	0	0	0	0	0	0
	64	0	0	0	0	0	0	0	0	0	0	0	0	0	0	0	0	0	0	0	0									64	0	0	0	0	0	0	0	0	0	0	0	0	0	0	0	0	0	0	0
	65	0	0	0	0	0	0	0	0	0	0	0	0	0	0	0	0	0	0	0	0									65	0	0	0	0	0	0	0	0	0	0	0	0	0	0	0	0	0	0	0
	66	0	0	0	0	0	0	0	0	0	0	0	0	0	0	0	0	0	0	0	0									66	0	0	0	0	0	0	0	0	0	0	0	0	0	0	0	0	0	0	0
	67	0	0	0	0	0	0	0	0	0	0	0	0	0	0	0	0	0	0	0	0									67	0	0	0	0	0	0	0	0	0	0	0	0	0	0	0	0	0	0	0
	68	0	0	0	0	0	0	0	0	0	0	0	0	0	0	0	0	0	0	0	0									68	0	0	0	0	0	0	0	0	0	0	0	0	0	0	0	0	0	0	0
	69	0	0	0	0	0	0	0	0	0	0	0	0	0	0	0	0	0	0	0	0									69	0	0	0	0	0	0	0	0	0	0	0	0	0	0	0	0	0	0	0
	70	0	0	0	0	0	0	0	0	0	0	0	0	0	0	0	0	0	0	0	0									70	0	0	0	0	0	0	0	0	0	0	0	0	0	0	0	0	0	0	0
	71	0	0	0	0	0	0	0	0	0	0	0	0	0	0	0	0	0	0	0	0									71	0	0	0	0	0	0	0	0	0	0	0	0	0	0	0	0	0	0	0
	72	0	0	0	0	0	0	0	0	0	0	0	0	0	0	0	0	0	0	0	0									72	0	0	0	0	0	0	0	0	0	0	0	0	0	0	0	0	0	0	0
	73	0	0	0	0	0	0	0	0	0	0	0	0	0	0	0	0	0	0	0	0									73	0	0	0	0	0	0	0	0	0	0	0	0	0	0	0	0	0	0	0
	74	0	0	0	0	0	0	0	0	0	0	0	0	0	0	0	0	0	0	0	0									74	0	0	0	0	0	0	0	0	0	0	0	0	0	0	0	0	0	0	0
	75	0	0	0	0	0	0	0	0	0	0	0	0	0	0	0	0	0	0	0	0									75	0	0	0	0	0	0	0	0	0	0	0	0	0	0	0	0	0	0	0
	76	0	0	0	0	0	0	0	0	0	0	0	0	0	0	0	0	0	0	0	0									76	0	0	0	0	0	0	0	0	0	0	0	0	0	0	0	0	0	0	0
	77	0	0	0	0	0	0	0	0	0	0	0	0	0	0	0	0	0	0	0	0									77	0	0	0	0	0	0	0	0	0	0	0	0	0	0	0	0	0	0	0
	78	0	0	0	0	0	0	0	0	0	0	0	0	0	0	0	0	0	0	0	0									78	0	0	0	0	0	0	0	0	0	0	0	0	0	0	0	0	0	0	0
	79	0	0	0	0	0	0	0	0	0	0	0	0	0	0	0	0	0	0	0	0									79	0	0	0	0	0	0	0	0	0	0	0	0	0	0	0	0	0	0	0
	80	0	0	0	0	0	0	0	0	0	0	0	0	0	0	0	0	0	0	0	0									80	0	0	0	0	0	0	0	0	0	0	0	0	0	0	0	0	0	0	0
	81	0	0	0	0	0	0	0	0	0	0	0	0	0	0	0	0	0	0	0	0									81	0	0	0	0	0	0	0	0	0	0	0	0	0	0	0	0	0	0	0
	82	0	0	0	0	0	0	0	0	0	0	0	0	0	0	0	0	0	0	0	0									82	0	0	0	0	0	0	0	0	0	0	0	0	0	0	0	0	0	0	0
	83	0	0	0	0	0	0	0	0	0	0	0	0	0	0	0	0	0	0	0	0									83	0	0	0	0	0	0	0	0	0	0	0	0	0	0	0	0	0	0	0
	84	0	0	0	0	0	0	0	0	0	0	0	0	0	0	0	0	0	0	0	0									84	0	0	0	0	0	0	0	0	0	0	0	0	0	0	0	0	0	0	0
	85	0	0	0	0	0	0	0	0	0	0	0	0	0	0	0	0	0	0	0	0									85	0	0	0	0	0	0	0	0	0	0	0	0	0	0	0	0	0	0	0
	86	0	0	0	0	0	0	0	0	0	0	0	0	0	0	0	0	0	0	0	0									86	0	0	0	0	0	0	0	0	0	0	0	0	0	0	0	0	0	0	0
	87	0	0	0	0	0	0	0	0	0	0	0	0	0	0	0	0	0	0	0	0									87	0	0	0	0	0	0	0	0	0	0	0	0	0	0	0	0	0	0	0
	88	0	0	0	0	0	0	0	0	0	0	0	0	0	0	0	0	0	0	0	0									88	0	0	0	0	0	0	0	0	0	0	0	0	0	0	0	0	0	0	0
	89	0	0	0	0	0	0	0	0	0	0	0	0	0	0	0	0	0	0	0	0									89	0	0	0	0	0	0	0	0	0	0	0	0	0	0	0	0	0	0	0
	90	0	0	0	0	0	0	0	0	0	0	0	0	0	0	0	0	0	0	0	0									90	0	0	0	0	0	0	0	0	0	0	0	0	0	0	0	0	0	0	0
	91	0	0	0	0	0	0	0	0	0	0	0	0	0	0	0	0	0	0	0	0									91	0	0	0	0	0	0	0	0	0	0	0	0	0	0	0	0	0	0	0
	92	0	0	0	0	0	0	0	0	0	0	0	0	0	0	0	0	0	0	0	0									92	0	0	0	0	0	0	0	0	0	0	0	0	0	0	0	0	0	0	0
	93	0	0	0	0	0	0	0	0	0	0	0	0	0	0	0	0	0	0	0	0									93	0	0	0	0	0	0	0	0	0	0	0	0	0	0	0	0	0	0	0
	94	0	0	0	0	0	0	0	0	0	0	0	0	0	0	0	0	0	0	0	0									94	0	0	0	0	0	0	0	0	0	0	0	0	0	0	0	0	0	0	0
	95	0	0	0	0	0	0	0	0	0	0	0	0	0	0	0	0	0	0	0	0									95	0	0	0	0	0	0	0	0	0	0	0	0	0	0	0	0	0	0	0
	96	0	0	0	0	0	0	0	0	0	0	0	0	0	0	0	0	0	0	0	0									96	0	0	0	0	0	0	0	0	0	0	0	0	0	0	0	0	0	0	0
	97	0	0	0	0	0	0	0	0	0	0	0	0	0	0	0	0	0	0	0	0									97	0	0	0	0	0	0	0	0	0	0	0	0	0	0	0	0	0	0	0
	98	0	0	0	0	0	0	0	0	0	0	0	0	0	0	0	0	0	0	0	0									98	0	0	0	0	0	0	0	0	0	0	0	0	0	0	0	0	0	0	0
	99	0	0	0	0	0	0	0	0	0	0	0	0	0	0	0	0	0	0	0	0									99	0	0	0	0	0	0	0	0	0	0	0	0	0	0	0	0	0	0	0
	100	0	0	0	0	0	0	0	0	0	0	0	0	0	0	0	0	0	0	0	0									100	0	0	0	0	0	0	0	0	0	0	0	0	0	0	0	0	0	0	0
	101	0	0	0	0	0	0	0	0	0	0	0	0	0	0	0	0	0	0	0	0									101	0	0	0	0	0	0	0	0	0	0	0	0	0	0	0	0	0	0	0
	102	0	0	0	0	0	0	0	0	0	0	0	0	0	0	0	0	0	0	0	0									102	0	0	0	0	0	0	0	0	0	0	0	0	0	0	0	0	0	0	0
	103	0	0	0	0	0	0	0	0	0	0	0	0	0	0	0	0	0	0	0	0									103	0	0	0	0	0	0	0	0	0	0	0	0	0	0	0	0	0	0	0
	104	0	0	0	0	0	0	0	0	0	0	0	0	0	0	0	0	0	0	0	0									104	0	0	0	0	0	0	0	0	0	0	0	0	0	0	0	0	0	0	0
	105	0	0	0	0	0	0	0	0	0	0	0	0	0	0	0	0	0	0	0	0									105	0	0	0	0	0	0	0	0	0	0	0	0	0	0	0	0	0	0	0
	106	0	0	0	0	0	0	0	0	0	0	0	0	0	0	0	0	0	0	0	0									106	0	0	0	0	0	0	0	0	0	0	0	0	0	0	0	0	0	0	0
	107	0	0	0	0	0	0	0	0	0	0	0	0	0	0	0	0	0	0	0	0									107	0	0	0	0	0	0	0	0	0	0	0	0	0	0	0	0	0	0	0
	108	0	0	0	0	0	0	0	0	0	0	0	0	0	0	0	0	0	0	0	0									108	0	0	0	0	0	0	0	0	0	0	0	0	0	0	0	0	0	0	0
	109	0	0	0	0	0	0	0	0	0	0	0	0	0	0	0	0	0	0	0	0									109	0	0	0	0	0	0	0	0	0	0	0	0	0	0	0	0	0	0	0
	110	0	0	0	0	0	0	0	0	0	0	0	0	0	0	0	0	0	0	0	0									110	0	0	0	0	0	0	0	0	0	0	0	0	0	0	0	0	0	0	0
	111	0	0	0	0	0	0	0	0	0	0	0	0	0	0	0	0	0	0	0	0									111	0	0	0	0	0	0	0	0	0	0	0	0	0	0	0	0	0	0	0
	112	0	0	0	0	0	0	0	0	0	0	0	0	0	0	0	0	0	0	0	0									112	0	0	0	0	0	0	0	0	0	0	0	0	0	0	0	0	0	0	0
	113	0	0	0	0	0	0	0	0	0	0	0	0	0	0	0	0	0	0	0	0									113	0	0	0	0	0	0	0	0	0	0	0	0	0	0	0	0	0	0	0
	114	0	0	0	0	0	0	0	0	0	0	0	0	0	0	0	0	0	0	0	0									114	0	0	0	0	0	0	0	0	0	0	0	0	0	0	0	0	0	0	0
	115	0	0	0	0	0	0	0	0	0	0	0	0	0	0	0	0	0	0	0	0									115	0	0	0	0	0	0	0	0	0	0	0	0	0	0	0	0	0	0	0
	116	0	0	0	0	0	0	0	0	0	0	0	0	0	0	0	0	0	0	0	0									116	0	0	0	0	0	0	0	0	0	0	0	0	0	0	0	0	0	0	0
	117	0	0	0	0	0	0	0	0	0	0	0	0	0	0	0	0	0	0	0	0									117	0	0	0	0	0	0	0	0	0	0	0	0	0	0	0	0	0	0	0
	118	0	0	0	0	0	0	0	0	0	0	0	0	0	0	0	0	0	0	0	0									118	0	0	0	0	0	0	0	0	0	0	0	0	0	0	0	0	0	0	0
	119	0	0	0	0	0	0	0	0	0	0	0	0	0	0	0	0	0	0	0	0									119	0	0	0	0	0	0	0	0	0	0	0	0	0	0	0	0	0	0	0
	120	0	0	0	0	0	0	0	0	0	0	0	0	0	0	0	0	0	0	0	0									120	0	0	0	0	0	0	0	0	0	0	0	0	0	0	0	0	0	0	0
	121	0	0	0	0	0	0	0	0	0	0	0	0	0	0	0	0	0	0	0	0									121	0	0	0	0	0	0	0	0	0	0	0	0	0	0	0	0	0	0	0
	122	0	0	0	0	0	0	0	0	0	0	0	0	0	0	0	0	0	0	0	0									122	0	0	0	0	0	0	0	0	0	0	0	0	0	0	0	0	0	0	0
	123	0	0	0	0	0	0	0	0	0	0	0	0	0	0	0	0	0	0	0	0									123	0	0	0	0	0	0	0	0	0	0	0	0	0	0	0	0	0	0	0
	124	0	0	0	0	0	0	0	0	0	0	0	0	0	0	0	0	0	0	0	0									124	0	0	0	0	0	0	0	0	0	0	0	0	0	0	0	0	0	0	0
	125	0	0	0	0	0	0	0	0	0	0	0	0	0	0	0	0	0	0	0	0									125	0	0	0	0	0	0	0	0	0	0	0	0	0	0	0	0	0	0	0
	126	0	0	0	0	0	0	0	0	0	0	0	0	0	0	0	0	0	0	0	0									126	0	0	0	0	0	0	0	0	0	0	0	0	0	0	0	0	0	0	0
	127	0	0	0	0	0	0	0	0	0	0	0	0	0	0	0	0	0	0	0	0									127	0	0	0	0	0	0	0	0	0	0	0	0	0	0	0	0	0	0	0
	128	0	0	0	0	0	0	0	0	0	0	0	0	0	0	0	0	0	0	0	0									128	0	0	0	0	0	0	0	0	0	0	0	0	0	0	0	0	0	0	0
	129	0	0	0	0	0	0	0	0	0	0	0	0	0	0	0	0	0	0	0	0									129	0	0	0	0	0	0	0	0	0	0	0	0	0	0	0	0	0	0	0
	130	0	0	0	0	0	0	0	0	0	0	0	0	0	0	0	0	0	0	0	0									130	0	0	0	0	0	0	0	0	0	0	0	0	0	0	0	0	0	0	0
	131	0	0	0	0	0	0	0	0	0	0	0	0	0	0	0	0	0	0	0	0									131	0	0	0	0	0	0	0	0	0	0	0	0	0	0	0	0	0	0	0
	132	0	0	0	0	0	0	0	0	0	0	0	0	0	0	0	0	0	0	0	0									132	0	0	0	0	0	0	0	0	0	0	0	0	0	0	0	0	0	0	0
	133	0	0	0	0	0	0	0	0	0	0	0	0	0	0	0	0	0	0	0	0									133	0	0	0	0	0	0	0	0	0	0	0	0	0	0	0	0	0	0	0
	134	0	0	0	0	0	0	0	0	0	0	0	0	0	0	0	0	0	0	0	0									134	0	0	0	0	0	0	0	0	0	0	0	0	0	0	0	0	0	0	0
	135	0	0	0	0	0	0	0	0	0	0	0	0	0	0	0	0	0	0	0	0									135	0	0	0	0	0	0	0	0	0	0	0	0	0	0	0	0	0	0	0
	136	0	0	0	0	0	0	0	0	0	0	0	0	0	0	0	0	0	0	0	0									136	0	0	0	0	0	0	0	0	0	0	0	0	0	0	0	0	0	0	0
	137	0	0	0	0	0	0	0	0	0	0	0	0	0	0	0	0	0	0	0	0									137	0	0	0	0	0	0	0	0	0	0	0	0	0	0	0	0	0	0	0
	138	0	0	0	0	0	0	0	0	0	0	0	0	0	0	0	0	0	0	0	0									138	0	0	0	0	0	0	0	0	0	0	0	0	0	0	0	0	0	0	0
	139	0	0	0	0	0	0	0	0	0	0	0	0	0	0	0	0	0	0	0	0									139	0	0	0	0	0	0	0	0	0	0	0	0	0	0	0	0	0	0	0
	140	0	0	0	0	0	0	0	0	0	0	0	0	0	0	0	0	0	0	0	0									140	0	0	0	0	0	0	0	0	0	0	0	0	0	0	0	0	0	0	0
	141	0	0	0	0	0	0	0	0	0	0	0	0	0	0	0	0	0	0	0	0									141	0	0	0	0	0	0	0	0	0	0	0	0	0	0	0	0	0	0	0
	142	0	0	0	0	0	0	0	0	0	0	0	0	0	0	0	0	0	0	0	0									142	0	0	0	0	0	0	0	0	0	0	0	0	0	0	0	0	0	0	0
	143	0	0	0	0	0	0	0	0	0	0	0	0	0	0	0	0	0	0	0	0									143	0	0	0	0	0	0	0	0	0	0	0	0	0	0	0	0	0	0	0
	144	0	0	0	0	0	0	0	0	0	0	0	0	0	0	0	0	0	0	0	0									144	0	0	0	0	0	0	0	0	0	0	0	0	0	0	0	0	0	0	0
	145	0	0	0	0	0	0	0	0	0	0	0	0	0	0	0	0	0	0	0	0									145	0	0	0	0	0	0	0	0	0	0	0	0	0	0	0	0	0	0	0
	146	0	0	0	0	0	0	0	0	0	0	0	0	0	0	0	0	0	0	0	0									146	0	0	0	0	0	0	0	0	0	0	0	0	0	0	0	0	0	0	0
	147	0	0	0	0	0	0	0	0	0	0	0	0	0	0	0	0	0	0	0	0									147	0	0	0	0	0	0	0	0	0	0	0	0	0	0	0	0	0	0	0
	148	0	0	0	0	0	0	0	0	0	0	0	0	0	0	0	0	0	0	0	0									148	0	0	0	0	0	0	0	0	0	0	0	0	0	0	0	0	0	0	0
	149	0	0	0	0	0	0	0	0	0	0	0	0	0	0	0	0	0	0	0	0									149	0	0	0	0	0	0	0	0	0	0	0	0	0	0	0	0	0	0	0
	150	0	0	0	0	0	0	0	0	0	0	0	0	0	0	0	0	0	0	0	0									150	0	0	0	0	0	0	0	0	0	0	0	0	0	0	0	0	0	0	0
	151	0	0	0	0	0	0	0	0	0	0	0	0	0	0	0	0	0	0	0	0									151	0	0	0	0	0	0	0	0	0	0	0	0	0	0	0	0	0	0	0
	152	0	0	0	0	0	0	0	0	0	0	0	0	0	0	0	0	0	0	0	0									152	0	0	0	0	0	0	0	0	0	0	0	0	0	0	0	0	0	0	0
	153	0	0	0	0	0	0	0	0	0	0	0	0	0	0	0	0	0	0	0	0									153	0	0	0	0	0	0	0	0	0	0	0	0	0	0	0	0	0	0	0
	154	0	0	0	0	0	0	0	0	0	0	0	0	0	0	0	0	0	0	0	0									154	0	0	0	0	0	0	0	0	0	0	0	0	0	0	0	0	0	0	0
	155	0	0	0	0	0	0	0	0	0	0	0	0	0	0	0	0	0	0	0	0									155	0	0	0	0	0	0	0	0	0	0	0	0	0	0	0	0	0	0	0
	156	0	0	0	0	0	0	0	0	0	0	0	0	0	0	0	0	0	0	0	0									156	0	0	0	0	0	0	0	0	0	0	0	0	0	0	0	0	0	0	0
	157	0	0	0	0	0	0	0	0	0	0	0	0	0	0	0	0	0	0	0	0									157	0	0	0	0	0	0	0	0	0	0	0	0	0	0	0	0	0	0	0
	158	0	0	0	0	0	0	0	0	0	0	0	0	0	0	0	0	0	0	0	0									158	0	0	0	0	0	0	0	0	0	0	0	0	0	0	0	0	0	0	0
	159	0	0	0	0	0	0	0	0	0	0	0	0	0	0	0	0	0	0	0	0									159	0	0	0	0	0	0	0	0	0	0	0	0	0	0	0	0	0	0	0
	160	0	0	0	0	0	0	0	0	0	0	0	0	0	0	0	0	0	0	0	0									160	0	0	0	0	0	0	0	0	0	0	0	0	0	0	0	0	0	0	0
	161	0	0	0	0	0	0	0	0	0	0	0	0	0	0	0	0	0	0	0	0									161	0	0	0	0	0	0	0	0	0	0	0	0	0	0	0	0	0	0	0
	162	0	0	0	0	0	0	0	0	0	0	0	0	0	0	0	0	0	0	0	0									162	0	0	0	0	0	0	0	0	0	0	0	0	0	0	0	0	0	0	0
	163	0	0	0	0	0	0	0	0	0	0	0	0	0	0	0	0	0	0	0	0									163	0	0	0	0	0	0	0	0	0	0	0	0	0	0	0	0	0	0	0
	164	0	0	0	0	0	0	0	0	0	0	0	0	0	0	0	0	0	0	0	0									164	0	0	0	0	0	0	0	0	0	0	0	0	0	0	0	0	0	0	0
	165	0	0	0	0	0	0	0	0	0	0	0	0	0	0	0	0	0	0	0	0									165	0	0	0	0	0	0	0	0	0	0	0	0	0	0	0	0	0	0	0
	166	0	0	0	0	0	0	0	0	0	0	0	0	0	0	0	0	0	0	0	0									166	0	0	0	0	0	0	0	0	0	0	0	0	0	0	0	0	0	0	0
	167	0	0	0	0	0	0	0	0	0	0	0	0	0	0	0	0	0	0	0	0									167	0	0	0	0	0	0	0	0	0	0	0	0	0	0	0	0	0	0	0
	168	0	0	0	0	0	0	0	0	0	0	0	0	0	0	0	0	0	0	0	0									168	0	0	0	0	0	0	0	0	0	0	0	0	0	0	0	0	0	0	0
	169	0	0	0	0	0	0	0	0	0	0	0	0	0	0	0	0	0	0	0	0									169	0	0	0	0	0	0	0	0	0	0	0	0	0	0	0	0	0	0	0
	170	0	0	0	0	0	0	0	0	0	0	0	0	0	0	0	0	0	0	0	0									170	0	0	0	0	0	0	0	0	0	0	0	0	0	0	0	0	0	0	0
	171	0	0	0	0	0	0	0	0	0	0	0	0	0	0	0	0	0	0	0	0									171	0	0	0	0	0	0	0	0	0	0	0	0	0	0	0	0	0	0	0
	172	0	0	0	0	0	0	0	0	0	0	0	0	0	0	0	0	0	0	0	0									172	0	0	0	0	0	0	0	0	0	0	0	0	0	0	0	0	0	0	0
	173	0	0	0	0	0	0	0	0	0	0	0	0	0	0	0	0	0	0	0	0									173	0	0	0	0	0	0	0	0	0	0	0	0	0	0	0	0	0	0	0
	174	0	0	0	0	0	0	0	0	0	0	0	0	0	0	0	0	0	0	0	0									174	0	0	0	0	0	0	0	0	0	0	0	0	0	0	0	0	0	0	0
	175	0	0	0	0	0	0	0	0	0	0	0	0	0	0	0	0	0	0	0	0									175	0	0	0	0	0	0	0	0	0	0	0	0	0	0	0	0	0	0	0
	176	0	0	0	0	0	0	0	0	0	0	0	0	0	0	0	0	0	0	0	0									176	0	0	0	0	0	0	0	0	0	0	0	0	0	0	0	0	0	0	0
	177	0	0	0	0	0	0	0	0	0	0	0	0	0	0	0	0	0	0	0	0									177	0	0	0	0	0	0	0	0	0	0	0	0	0	0	0	0	0	0	0
	178	0	0	0	0	0	0	0	0	0	0	0	0	0	0	0	0	0	0	0	0									178	0	0	0	0	0	0	0	0	0	0	0	0	0	0	0	0	0	0	0
	179	0	0	0	0	0	0	0	0	0	0	0	0	0	0	0	0	0	0	0	0									179	0	0	0	0	0	0	0	0	0	0	0	0	0	0	0	0	0	0	0
	180	0	0	0	0	0	0	0	0	0	0	0	0	0	0	0	0	0	0	0	0									180	0	0	0	0	0	0	0	0	0	0	0	0	0	0	0	0	0	0	0
	181	0	0	0	0	0	0	0	0	0	0	0	0	0	0	0	0	0	0	0	0									181	0	0	0	0	0	0	0	0	0	0	0	0	0	0	0	0	0	0	0
	182	0	0	0	0	0	0	0	0	0	0	0	0	0	0	0	0	0	0	0	0									182	0	0	0	0	0	0	0	0	0	0	0	0	0	0	0	0	0	0	0
	183	0	0	0	0	0	0	0	0	0	0	0	0	0	0	0	0	0	0	0	0									183	0	0	0	0	0	0	0	0	0	0	0	0	0	0	0	0	0	0	0
	184	0	0	0	0	0	0	0	0	0	0	0	0	0	0	0	0	0	0	0	0									184	0	0	0	0	0	0	0	0	0	0	0	0	0	0	0	0	0	0	0
	185	0	0	0	0	0	0	0	0	0	0	0	0	0	0	0	0	0	0	0	0									185	0	0	0	0	0	0	0	0	0	0	0	0	0	0	0	0	0	0	0
	186	0	0	0	0	0	0	0	0	0	0	0	0	0	0	0	0	0	0	0	0									186	0	0	0	0	0	0	0	0	0	0	0	0	0	0	0	0	0	0	0
	187	0	0	0	0	0	0	0	0	0	0	0	0	0	0	0	0	0	0	0	0									187	0	0	0	0	0	0	0	0	0	0	0	0	0	0	0	0	0	0	0
	188	0	0	0	0	0	0	0	0	0	0	0	0	0	0	0	0	0	0	0	0									188	0	0	0	0	0	0	0	0	0	0	0	0	0	0	0	0	0	0	0
	189	0	0	0	0	0	0	0	0	0	0	0	0	0	0	0	0	0	0	0	0									189	0	0	0	0	0	0	0	0	0	0	0	0	0	0	0	0	0	0	0
	190	0	0	0	0	0	0	0	0	0	0	0	0	0	0	0	0	0	0	0	0									190	0	0	0	0	0	0	0	0	0	0	0	0	0	0	0	0	0	0	0
	191	0	0	0	0	0	0	0	0	0	0	0	0	0	0	0	0	0	0	0	0									191	0	0	0	0	0	0	0	0	0	0	0	0	0	0	0	0	0	0	0
	192	0	0	0	0	0	0	0	0	0	0	0	0	0	0	0	0	0	0	0	0									192	0	0	0	0	0	0	0	0	0	0	0	0	0	0	0	0	0	0	0
	193	0	0	0	0	0	0	0	0	0	0	0	0	0	0	0	0	0	0	0	0									193	0	0	0	0	0	0	0	0	0	0	0	0	0	0	0	0	0	0	0
	194	0	0	0	0	0	0	0	0	0	0	0	0	0	0	0	0	0	0	0	0									194	0	0	0	0	0	0	0	0	0	0	0	0	0	0	0	0	0	0	0
	195	0	0	0	0	0	0	0	0	0	0	0	0	0	0	0	0	0	0	0	0									195	0	0	0	0	0	0	0	0	0	0	0	0	0	0	0	0	0	0	0
	196	0	0	0	0	0	0	0	0	0	0	0	0	0	0	0	0	0	0	0	0									196	0	0	0	0	0	0	0	0	0	0	0	0	0	0	0	0	0	0	0
	197	0	0	0	0	0	0	0	0	0	0	0	0	0	0	0	0	0	0	0	0									197	0	0	0	0	0	0	0	0	0	0	0	0	0	0	0	0	0	0	0
	198	0	0	0	0	0	0	0	0	0	0	0	0	0	0	0	0	0	0	0	0									198	0	0	0	0	0	0	0	0	0	0	0	0	0	0	0	0	0	0	0
	199	0	0	0	0	0	0	0	0	0	0	0	0	0	0	0	0	0	0	0	0									199	0	0	0	0	0	0	0	0	0	0	0	0	0	0	0	0	0	0	0
	200	0	0	0	0	0	0	0	0	0	0	0	0	0	0	0	0	0	0	0	0									200	0	0	0	0	0	0	0	0	0	0	0	0	0	0	0	0	0	0	0
	201	0	0	0	0	0	0	0	0	0	0	0	0	0	0	0	0	0	0	0	0									201	0	0	0	0	0	0	0	0	0	0	0	0	0	0	0	0	0	0	0
	202	0	0	0	0	0	0	0	0	0	0	0	0	0	0	0	0	0	0	0	0									202	0	0	0	0	0	0	0	0	0	0	0	0	0	0	0	0	0	0	0
	203	0	0	0	0	0	0	0	0	0	0	0	0	0	0	0	0	0	0	0	0									203	0	0	0	0	0	0	0	0	0	0	0	0	0	0	0	0	0	0	0
	204	0	0	0	0	0	0	0	0	0	0	0	0	0	0	0	0	0	0	0	0									204	0	0	0	0	0	0	0	0	0	0	0	0	0	0	0	0	0	0	0
	205	0	0	0	0	0	0	0	0	0	0	0	0	0	0	0	0	0	0	0	0									205	0	0	0	0	0	0	0	0	0	0	0	0	0	0	0	0	0	0	0
	206	0	0	0	0	0	0	0	0	0	0	0	0	0	0	0	0	0	0	0	0									206	0	0	0	0	0	0	0	0	0	0	0	0	0	0	0	0	0	0	0
	207	0	0	0	0	0	0	0	0	0	0	0	0	0	0	0	0	0	0	0	0									207	0	0	0	0	0	0	0	0	0	0	0	0	0	0	0	0	0	0	0
	208	0	0	0	0	0	0	0	0	0	0	0	0	0	0	0	0	0	0	0	0									208	0	0	0	0	0	0	0	0	0	0	0	0	0	0	0	0	0	0	0
	209	0	0	0	0	0	0	0	0	0	0	0	0	0	0	0	0	0	0	0	0									209	0	0	0	0	0	0	0	0	0	0	0	0	0	0	0	0	0	0	0
	210	0	0	0	0	0	0	0	0	0	0	0	0	0	0	0	0	0	0	0	0									210	0	0	0	0	0	0	0	0	0	0	0	0	0	0	0	0	0	0	0
	211	0	0	0	0	0	0	0	0	0	0	0	0	0	0	0	0	0	0	0	0									211	0	0	0	0	0	0	0	0	0	0	0	0	0	0	0	0	0	0	0
	212	0	0	0	0	0	0	0	0	0	0	0	0	0	0	0	0	0	0	0	0									212	0	0	0	0	0	0	0	0	0	0	0	0	0	0	0	0	0	0	0
	213	0	0	0	0	0	0	0	0	0	0	0	0	0	0	0	0	0	0	0	0									213	0	0	0	0	0	0	0	0	0	0	0	0	0	0	0	0	0	0	0
	214	0	0	0	0	0	0	0	0	0	0	0	0	0	0	0	0	0	0	0	0									214	0	0	0	0	0	0	0	0	0	0	0	0	0	0	0	0	0	0	0
	215	0	0	0	0	0	0	0	0	0	0	0	0	0	0	0	0	0	0	0	0									215	0	0	0	0	0	0	0	0	0	0	0	0	0	0	0	0	0	0	0
	216	0	0	0	0	0	0	0	0	0	0	0	0	0	0	0	0	0	0	0	0									216	0	0	0	0	0	0	0	0	0	0	0	0	0	0	0	0	0	0	0
	217	0	0	0	0	0	0	0	0	0	0	0	0	0	0	0	0	0	0	0	0									217	0	0	0	0	0	0	0	0	0	0	0	0	0	0	0	0	0	0	0
	218	0	0	0	0	0	0	0	0	0	0	0	0	0	0	0	0	0	0	0	0									218	0	0	0	0	0	0	0	0	0	0	0	0	0	0	0	0	0	0	0
	219	0	0	0	0	0	0	0	0	0	0	0	0	0	0	0	0	0	0	0	0									219	0	0	0	0	0	0	0	0	0	0	0	0	0	0	0	0	0	0	0
	220	0	0	0	0	0	0	0	0	0	0	0	0	0	0	0	0	0	0	0	0									220	0	0	0	0	0	0	0	0	0	0	0	0	0	0	0	0	0	0	0
	221	0	0	0	0	0	0	0	0	0	0	0	0	0	0	0	0	0	0	0	0									221	0	0	0	0	0	0	0	0	0	0	0	0	0	0	0	0	0	0	0
	222	0	0	0	0	0	0	0	0	0	0	0	0	0	0	0	0	0	0	0	0									222	0	0	0	0	0	0	0	0	0	0	0	0	0	0	0	0	0	0	0
	223	0	0	0	0	0	0	0	0	0	0	0	0	0	0	0	0	0	0	0	0									223	0	0	0	0	0	0	0	0	0	0	0	0	0	0	0	0	0	0	0
	224	0	0	0	0	0	0	0	0	0	0	0	0	0	0	0	0	0	0	0	0									224	0	0	0	0	0	0	0	0	0	0	0	0	0	0	0	0	0	0	0
	225	0	0	0	0	0	0	0	0	0	0	0	0	0	0	0	0	0	0	0	0									225	0	0	0	0	0	0	0	0	0	0	0	0	0	0	0	0	0	0	0
	226	0	0	0	0	0	0	0	0	0	0	0	0	0	0	0	0	0	0	0	0									226	0	0	0	0	0	0	0	0	0	0	0	0	0	0	0	0	0	0	0
	227	0	0	0	0	0	0	0	0	0	0	0	0	0	0	0	0	0	0	0	0									227	0	0	0	0	0	0	0	0	0	0	0	0	0	0	0	0	0	0	0
	228	0	0	0	0	0	0	0	0	0	0	0	0	0	0	0	0	0	0	0	0									228	0	0	0	0	0	0	0	0	0	0	0	0	0	0	0	0	0	0	0
	229	0	0	0	0	0	0	0	0	0	0	0	0	0	0	0	0	0	0	0	0									229	0	0	0	0	0	0	0	0	0	0	0	0	0	0	0	0	0	0	0
	230	0	0	0	0	0	0	0	0	0	0	0	0	0	0	0	0	0	0	0	0									230	0	0	0	0	0	0	0	0	0	0	0	0	0	0	0	0	0	0	0
	231	0	0	0	0	0	0	0	0	0	0	0	0	0	0	0	0	0	0	0	0									231	0	0	0	0	0	0	0	0	0	0	0	0	0	0	0	0	0	0	0
	232	0	0	0	0	0	0	0	0	0	0	0	0	0	0	0	0	0	0	0	0									232	0	0	0	0	0	0	0	0	0	0	0	0	0	0	0	0	0	0	0
	233	0	0	0	0	0	0	0	0	0	0	0	0	0	0	0	0	0	0	0	0									233	0	0	0	0	0	0	0	0	0	0	0	0	0	0	0	0	0	0	0
	234	0	0	0	0	0	0	0	0	0	0	0	0	0	0	0	0	0	0	0	0									234	0	0	0	0	0	0	0	0	0	0	0	0	0	0	0	0	0	0	0
	235	0	0	0	0	0	0	0	0	0	0	0	0	0	0	0	0	0	0	0	0									235	0	0	0	0	0	0	0	0	0	0	0	0	0	0	0	0	0	0	0
	236	0	0	0	0	0	0	0	0	0	0	0	0	0	0	0	0	0	0	0	0									236	0	0	0	0	0	0	0	0	0	0	0	0	0	0	0	0	0	0	0
	237	0	0	0	0	0	0	0	0	0	0	0	0	0	0	0	0	0	0	0	0									237	0	0	0	0	0	0	0	0	0	0	0	0	0	0	0	0	0	0	0
	238	0	0	0	0	0	0	0	0	0	0	0	0	0	0	0	0	0	0	0	0									238	0	0	0	0	0	0	0	0	0	0	0	0	0	0	0	0	0	0	0
	239	0	0	0	0	0	0	0	0	0	0	0	0	0	0	0	0	0	0	0	0									239	0	0	0	0	0	0	0	0	0	0	0	0	0	0	0	0	0	0	0
	240	0	0	0	0	0	0	0	0	0	0	0	0	0	0	0	0	0	0	0	0									240	0	0	0	0	0	0	0	0	0	0	0	0	0	0	0	0	0	0	0
	241	0	0	0	0	0	0	0	0	0	0	0	0	0	0	0	0	0	0	0	0									241	0	0	0	0	0	0	0	0	0	0	0	0	0	0	0	0	0	0	0
	242	0	0	0	0	0	0	0	0	0	0	0	0	0	0	0	0	0	0	0	0									242	0	0	0	0	0	0	0	0	0	0	0	0	0	0	0	0	0	0	0
	243	0	0	0	0	0	0	0	0	0	0	0	0	0	0	0	0	0	0	0	0									243	0	0	0	0	0	0	0	0	0	0	0	0	0	0	0	0	0	0	0
	244	0	0	0	0	0	0	0	0	0	0	0	0	0	0	0	0	0	0	0	0									244	0	0	0	0	0	0	0	0	0	0	0	0	0	0	0	0	0	0	0
	245	0	0	0	0	0	0	0	0	0	0	0	0	0	0	0	0	0	0	0	0									245	0	0	0	0	0	0	0	0	0	0	0	0	0	0	0	0	0	0	0
	246	0	0	0	0	0	0	0	0	0	0	0	0	0	0	0	0	0	0	0	0									246	0	0	0	0	0	0	0	0	0	0	0	0	0	0	0	0	0	0	0
	247	0	0	0	0	0	0	0	0	0	0	0	0	0	0	0	0	0	0	0	0									247	0	0	0	0	0	0	0	0	0	0	0	0	0	0	0	0	0	0	0
	248	0	0	0	0	0	0	0	0	0	0	0	0	0	0	0	0	0	0	0	0									248	0	0	0	0	0	0	0	0	0	0	0	0	0	0	0	0	0	0	0
	249	0	0	0	0	0	0	0	0	0	0	0	0	0	0	0	0	0	0	0	0									249	0	0	0	0	0	0	0	0	0	0	0	0	0	0	0	0	0	0	0
	250	0	0	0	0	0	0	0	0	0	0	0	0	0	0	0	0	0	0	0	0									250	0	0	0	0	0	0	0	0	0	0	0	0	0	0	0	0	0	0	0
	251	0	0	0	0	0	0	0	0	0	0	0	0	0	0	0	0	0	0	0	0									251	0	0	0	0	0	0	0	0	0	0	0	0	0	0	0	0	0	0	0
	252	0	0	0	0	0	0	0	0	0	0	0	0	0	0	0	0	0	0	0	0									252	0	0	0	0	0	0	0	0	0	0	0	0	0	0	0	0	0	0	0
	253	0	0	0	0	0	0	0	0	0	0	0	0	0	0	0	0	0	0	0	0									253	0	0	0	0	0	0	0	0	0	0	0	0	0	0	0	0	0	0	0
	254	0	0	0	0	0	0	0	0	0	0	0	0	0	0	0	0	0	0	0	0									254	0	0	0	0	0	0	0	0	0	0	0	0	0	0	0	0	0	0	0
	255	0	0	0	0	0	0	0	0	0	0	0	0	0	0	0	0	0	0	0	0									255	0	0	0	0	0	0	0	0	0	0	0	0	0	0	0	0	0	0	0
	256	0	0	0	0	0	0	0	0	0	0	0	0	0	0	0	0	0	0	0	0									256	0	0	0	0	0	0	0	0	0	0	0	0	0	0	0	0	0	0	0
	257	0	0	0	0	0	0	0	0	0	0	0	0	0	0	0	0	0	0	0	0									257	0	0	0	0	0	0	0	0	0	0	0	0	0	0	0	0	0	0	0
	258	0	0	0	0	0	0	0	0	0	0	0	0	0	0	0	0	0	0	0	0									258	0	0	0	0	0	0	0	0	0	0	0	0	0	0	0	0	0	0	0
	259	0	0	0	0	0	0	0	0	0	0	0	0	0	0	0	0	0	0	0	0									259	0	0	0	0	0	0	0	0	0	0	0	0	0	0	0	0	0	0	0
	260	0	0	0	0	0	0	0	0	0	0	0	0	0	0	0	0	0	0	0	0									260	0	0	0	0	0	0	0	0	0	0	0	0	0	0	0	0	0	0	0
	261	0	0	0	0	0	0	0	0	0	0	0	0	0	0	0	0	0	0	0	0									261	0	0	0	0	0	0	0	0	0	0	0	0	0	0	0	0	0	0	0
	262	0	0	0	0	0	0	0	0	0	0	0	0	0	0	0	0	0	0	0	0									262	0	0	0	0	0	0	0	0	0	0	0	0	0	0	0	0	0	0	0
	263	0	0	0	0	0	0	0	0	0	0	0	0	0	0	0	0	0	0	0	0									263	0	0	0	0	0	0	0	0	0	0	0	0	0	0	0	0	0	0	0
	264	0	0	0	0	0	0	0	0	0	0	0	0	0	0	0	0	0	0	0	0									264	0	0	0	0	0	0	0	0	0	0	0	0	0	0	0	0	0	0	0
	265	0	0	0	0	0	0	0	0	0	0	0	0	0	0	0	0	0	0	0	0									265	0	0	0	0	0	0	0	0	0	0	0	0	0	0	0	0	0	0	0
	266	0	0	0	0	0	0	0	0	0	0	0	0	0	0	0	0	0	0	0	0									266	0	0	0	0	0	0	0	0	0	0	0	0	0	0	0	0	0	0	0
	267	0	0	0	0	0	0	0	0	0	0	0	0	0	0	0	0	0	0	0	0									267	0	0	0	0	0	0	0	0	0	0	0	0	0	0	0	0	0	0	0
	268	0	0	0	0	0	0	0	0	0	0	0	0	0	0	0	0	0	0	0	0									268	0	0	0	0	0	0	0	0	0	0	0	0	0	0	0	0	0	0	0
	269	0	0	0	0	0	0	0	0	0	0	0	0	0	0	0	0	0	0	0	0									269	0	0	0	0	0	0	0	0	0	0	0	0	0	0	0	0	0	0	0
	270	0	0	0	0	0	0	0	0	0	0	0	0	0	0	0	0	0	0	0	0									270	0	0	0	0	0	0	0	0	0	0	0	0	0	0	0	0	0	0	0
	271	0	0	0	0	0	0	0	0	0	0	0	0	0	0	0	0	0	0	0	0									271	0	0	0	0	0	0	0	0	0	0	0	0	0	0	0	0	0	0	0
	272	0	0	0	0	0	0	0	0	0	0	0	0	0	0	0	0	0	0	0	0									272	0	0	0	0	0	0	0	0	0	0	0	0	0	0	0	0	0	0	0
	273	0	0	0	0	0	0	0	0	0	0	0	0	0	0	0	0	0	0	0	0									273	0	0	0	0	0	0	0	0	0	0	0	0	0	0	0	0	0	0	0
	274	0	0	0	0	0	0	0	0	0	0	0	0	0	0	0	0	0	0	0	0									274	0	0	0	0	0	0	0	0	0	0	0	0	0	0	0	0	0	0	0
	275	0	0	0	0	0	0	0	0	0	0	0	0	0	0	0	0	0	0	0	0									275	0	0	0	0	0	0	0	0	0	0	0	0	0	0	0	0	0	0	0
	276	0	0	0	0	0	0	0	0	0	0	0	0	0	0	0	0	0	0	0	0									276	0	0	0	0	0	0	0	0	0	0	0	0	0	0	0	0	0	0	0
	277	0	0	0	0	0	0	0	0	0	0	0	0	0	0	0	0	0	0	0	0									277	0	0	0	0	0	0	0	0	0	0	0	0	0	0	0	0	0	0	0
	278	0	0	0	0	0	0	0	0	0	0	0	0	0	0	0	0	0	0	0	0									278	0	0	0	0	0	0	0	0	0	0	0	0	0	0	0	0	0	0	0
	279	0	0	0	0	0	0	0	0	0	0	0	0	0	0	0	0	0	0	0	0									279	0	0	0	0	0	0	0	0	0	0	0	0	0	0	0	0	0	0	0
	280	0	0	0	0	0	0	0	0	0	0	0	0	0	0	0	0	0	0	0	0									280	0	0	0	0	0	0	0	0	0	0	0	0	0	0	0	0	0	0	0
	281	0	0	0	0	0	0	0	0	0	0	0	0	0	0	0	0	0	0	0	0									281	0	0	0	0	0	0	0	0	0	0	0	0	0	0	0	0	0	0	0
	282	0	0	0	0	0	0	0	0	0	0	0	0	0	0	0	0	0	0	0	0									282	0	0	0	0	0	0	0	0	0	0	0	0	0	0	0	0	0	0	0
	283	0	0	0	0	0	0	0	0	0	0	0	0	0	0	0	0	0	0	0	0									283	0	0	0	0	0	0	0	0	0	0	0	0	0	0	0	0	0	0	0
	284	0	0	0	0	0	0	0	0	0	0	0	0	0	0	0	0	0	0	0	0									284	0	0	0	0	0	0	0	0	0	0	0	0	0	0	0	0	0	0	0
	285	0	0	0	0	0	0	0	0	0	0	0	0	0	0	0	0	0	0	0	0									285	0	0	0	0	0	0	0	0	0	0	0	0	0	0	0	0	0	0	0
	286	0	0	0	0	0	0	0	0	0	0	0	0	0	0	0	0	0	0	0	0									286	0	0	0	0	0	0	0	0	0	0	0	0	0	0	0	0	0	0	0
	287	0	0	0	0	0	0	0	0	0	0	0	0	0	0	0	0	0	0	0	0									287	0	0	0	0	0	0	0	0	0	0	0	0	0	0	0	0	0	0	0
	288	0	0	0	0	0	0	0	0	0	0	0	0	0	0	0	0	0	0	0	0									288	0	0	0	0	0	0	0	0	0	0	0	0	0	0	0	0	0	0	0
	289	0	0	0	0	0	0	0	0	0	0	0	0	0	0	0	0	0	0	0	0									289	0	0	0	0	0	0	0	0	0	0	0	0	0	0	0	0	0	0	0
	290	0	0	0	0	0	0	0	0	0	0	0	0	0	0	0	0	0	0	0	0									290	0	0	0	0	0	0	0	0	0	0	0	0	0	0	0	0	0	0	0
	291	0	0	0	0	0	0	0	0	0	0	0	0	0	0	0	0	0	0	0	0									291	0	0	0	0	0	0	0	0	0	0	0	0	0	0	0	0	0	0	0
	292	0	0	0	0	0	0	0	0	0	0	0	0	0	0	0	0	0	0	0	0									292	0	0	0	0	0	0	0	0	0	0	0	0	0	0	0	0	0	0	0
	293	0	0	0	0	0	0	0	0	0	0	0	0	0	0	0	0	0	0	0	0									293	0	0	0	0	0	0	0	0	0	0	0	0	0	0	0	0	0	0	0
	294	0	0	0	0	0	0	0	0	0	0	0	0	0	0	0	0	0	0	0	0									294	0	0	0	0	0	0	0	0	0	0	0	0	0	0	0	0	0	0	0
	295	0	0	0	0	0	0	0	0	0	0	0	0	0	0	0	0	0	0	0	0									295	0	0	0	0	0	0	0	0	0	0	0	0	0	0	0	0	0	0	0
	296	0	0	0	0	0	0	0	0	0	0	0	0	0	0	0	0	0	0	0	0									296	0	0	0	0	0	0	0	0	0	0	0	0	0	0	0	0	0	0	0
	297	0	0	0	0	0	0	0	0	0	0	0	0	0	0	0	0	0	0	0	0									297	0	0	0	0	0	0	0	0	0	0	0	0	0	0	0	0	0	0	0
	298	0	0	0	0	0	0	0	0	0	0	0	0	0	0	0	0	0	0	0	0									298	0	0	0	0	0	0	0	0	0	0	0	0	0	0	0	0	0	0	0
	299	0	0	0	0	0	0	0	0	0	0	0	0	0	0	0	0	0	0	0	0									299	0	0	0	0	0	0	0	0	0	0	0	0	0	0	0	0	0	0	0
	300	0	0	0	0	0	0	0	0	0	0	0	0	0	0	0	0	0	0	0	0									300	0	0	0	0	0	0	0	0	0	0	0	0	0	0	0	0	0	0	0
	301	0	0	0	0	0	0	0	0	0	0	0	0	0	0	0	0	0	0	0	0									301	0	0	0	0	0	0	0	0	0	0	0	0	0	0	0	0	0	0	0
	302	0	0	0	0	0	0	0	0	0	0	0	0	0	0	0	0	0	0	0	0									302	0	0	0	0	0	0	0	0	0	0	0	0	0	0	0	0	0	0	0
	303	0	0	0	0	0	0	0	0	0	0	0	0	0	0	0	0	0	0	0	0									303	0	0	0	0	0	0	0	0	0	0	0	0	0	0	0	0	0	0	0
	304	0	0	0	0	0	0	0	0	0	0	0	0	0	0	0	0	0	0	0	0									304	0	0	0	0	0	0	0	0	0	0	0	0	0	0	0	0	0	0	0
	305	0	0	0	0	0	0	0	0	0	0	0	0	0	0	0	0	0	0	0	0									305	0	0	0	0	0	0	0	0	0	0	0	0	0	0	0	0	0	0	0
	306	0	0	0	0	0	0	0	0	0	0	0	0	0	0	0	0	0	0	0	0									306	0	0	0	0	0	0	0	0	0	0	0	0	0	0	0	0	0	0	0
	307	0	0	0	0	0	0	0	0	0	0	0	0	0	0	0	0	0	0	0	0									307	0	0	0	0	0	0	0	0	0	0	0	0	0	0	0	0	0	0	0
	308	0	0	0	0	0	0	0	0	0	0	0	0	0	0	0	0	0	0	0	0									308	0	0	0	0	0	0	0	0	0	0	0	0	0	0	0	0	0	0	0
	309	0	0	0	0	0	0	0	0	0	0	0	0	0	0	0	0	0	0	0	0									309	0	0	0	0	0	0	0	0	0	0	0	0	0	0	0	0	0	0	0
	310	0	0	0	0	0	0	0	0	0	0	0	0	0	0	0	0	0	0	0	0									310	0	0	0	0	0	0	0	0	0	0	0	0	0	0	0	0	0	0	0
	311	0	0	0	0	0	0	0	0	0	0	0	0	0	0	0	0	0	0	0	0									311	0	0	0	0	0	0	0	0	0	0	0	0	0	0	0	0	0	0	0
	312	0	0	0	0	0	0	0	0	0	0	0	0	0	0	0	0	0	0	0	0									312	0	0	0	0	0	0	0	0	0	0	0	0	0	0	0	0	0	0	0
	313	0	0	0	0	0	0	0	0	0	0	0	0	0	0	0	0	0	0	0	0									313	0	0	0	0	0	0	0	0	0	0	0	0	0	0	0	0	0	0	0
	314	0	0	0	0	0	0	0	0	0	0	0	0	0	0	0	0	0	0	0	0									314	0	0	0	0	0	0	0	0	0	0	0	0	0	0	0	0	0	0	0
	315	0	0	0	0	0	0	0	0	0	0	0	0	0	0	0	0	0	0	0	0									315	0	0	0	0	0	0	0	0	0	0	0	0	0	0	0	0	0	0	0
	316	0	0	0	0	0	0	0	0	0	0	0	0	0	0	0	0	0	0	0	0									316	0	0	0	0	0	0	0	0	0	0	0	0	0	0	0	0	0	0	0
	317	0	0	0	0	0	0	0	0	0	0	0	0	0	0	0	0	0	0	0	0									317	0	0	0	0	0	0	0	0	0	0	0	0	0	0	0	0	0	0	0
	318	0	0	0	0	0	0	0	0	0	0	0	0	0	0	0	0	0	0	0	0									318	0	0	0	0	0	0	0	0	0	0	0	0	0	0	0	0	0	0	0
	319	0	0	0	0	0	0	0	0	0	0	0	0	0	0	0	0	0	0	0	0									319	0	0	0	0	0	0	0	0	0	0	0	0	0	0	0	0	0	0	0
	320	0	0	0	0	0	0	0	0	0	0	0	0	0	0	0	0	0	0	0	0									320	0	0	0	0	0	0	0	0	0	0	0	0	0	0	0	0	0	0	0
	321	0	0	0	0	0	0	0	0	0	0	0	0	0	0	0	0	0	0	0	0									321	0	0	0	0	0	0	0	0	0	0	0	0	0	0	0	0	0	0	0
	322	0	0	0	0	0	0	0	0	0	0	0	0	0	0	0	0	0	0	0	0									322	0	0	0	0	0	0	0	0	0	0	0	0	0	0	0	0	0	0	0
	323	0	0	0	0	0	0	0	0	0	0	0	0	0	0	0	0	0	0	0	0									323	0	0	0	0	0	0	0	0	0	0	0	0	0	0	0	0	0	0	0
	324	0	0	0	0	0	0	0	0	0	0	0	0	0	0	0	0	0	0	0	0									324	0	0	0	0	0	0	0	0	0	0	0	0	0	0	0	0	0	0	0
	325	0	0	0	0	0	0	0	0	0	0	0	0	0	0	0	0	0	0	0	0									325	0	0	0	0	0	0	0	0	0	0	0	0	0	0	0	0	0	0	0
	326	0	0	0	0	0	0	0	0	0	0	0	0	0	0	0	0	0	0	0	0									326	0	0	0	0	0	0	0	0	0	0	0	0	0	0	0	0	0	0	0
	327	0	0	0	0	0	0	0	0	0	0	0	0	0	0	0	0	0	0	0	0									327	0	0	0	0	0	0	0	0	0	0	0	0	0	0	0	0	0	0	0
	328	0	0	0	0	0	0	0	0	0	0	0	0	0	0	0	0	0	0	0	0									328	0	0	0	0	0	0	0	0	0	0	0	0	0	0	0	0	0	0	0
	329	0	0	0	0	0	0	0	0	0	0	0	0	0	0	0	0	0	0	0	0									329	0	0	0	0	0	0	0	0	0	0	0	0	0	0	0	0	0	0	0
	330	0	0	0	0	0	0	0	0	0	0	0	0	0	0	0	0	0	0	0	0									330	0	0	0	0	0	0	0	0	0	0	0	0	0	0	0	0	0	0	0
	331	0	0	0	0	0	0	0	0	0	0	0	0	0	0	0	0	0	0	0	0									331	0	0	0	0	0	0	0	0	0	0	0	0	0	0	0	0	0	0	0
	332	0	0	0	0	0	0	0	0	0	0	0	0	0	0	0	0	0	0	0	0									332	0	0	0	0	0	0	0	0	0	0	0	0	0	0	0	0	0	0	0
	333	0	0	0	0	0	0	0	0	0	0	0	0	0	0	0	0	0	0	0	0									333	0	0	0	0	0	0	0	0	0	0	0	0	0	0	0	0	0	0	0
	334	0	0	0	0	0	0	0	0	0	0	0	0	0	0	0	0	0	0	0	0									334	0	0	0	0	0	0	0	0	0	0	0	0	0	0	0	0	0	0	0
	335	0	0	0	0	0	0	0	0	0	0	0	0	0	0	0	0	0	0	0	0									335	0	0	0	0	0	0	0	0	0	0	0	0	0	0	0	0	0	0	0
	336	0	0	0	0	0	0	0	0	0	0	0	0	0	0	0	0	0	0	0	0									336	0	0	0	0	0	0	0	0	0	0	0	0	0	0	0	0	0	0	0
	337	0	0	0	0	0	0	0	0	0	0	0	0	0	0	0	0	0	0	0	0									337	0	0	0	0	0	0	0	0	0	0	0	0	0	0	0	0	0	0	0
	338	0	0	0	0	0	0	0	0	0	0	0	0	0	0	0	0	0	0	0	0									338	0	0	0	0	0	0	0	0	0	0	0	0	0	0	0	0	0	0	0
	339	0	0	0	0	0	0	0	0	0	0	0	0	0	0	0	0	0	0	0	0									339	0	0	0	0	0	0	0	0	0	0	0	0	0	0	0	0	0	0	0
	340	0	0	0	0	0	0	0	0	0	0	0	0	0	0	0	0	0	0	0	0									340	0	0	0	0	0	0	0	0	0	0	0	0	0	0	0	0	0	0	0
	341	0	0	0	0	0	0	0	0	0	0	0	0	0	0	0	0	0	0	0	0									341	0	0	0	0	0	0	0	0	0	0	0	0	0	0	0	0	0	0	0
	342	0	0	0	0	0	0	0	0	0	0	0	0	0	0	0	0	0	0	0	0									342	0	0	0	0	0	0	0	0	0	0	0	0	0	0	0	0	0	0	0
	343	0	0	0	0	0	0	0	0	0	0	0	0	0	0	0	0	0	0	0	0									343	0	0	0	0	0	0	0	0	0	0	0	0	0	0	0	0	0	0	0
	344	0	0	0	0	0	0	0	0	0	0	0	0	0	0	0	0	0	0	0	0									344	0	0	0	0	0	0	0	0	0	0	0	0	0	0	0	0	0	0	0
	345	0	0	0	0	0	0	0	0	0	0	0	0	0	0	0	0	0	0	0	0									345	0	0	0	0	0	0	0	0	0	0	0	0	0	0	0	0	0	0	0
	346	0	0	0	0	0	0	0	0	0	0	0	0	0	0	0	0	0	0	0	0									346	0	0	0	0	0	0	0	0	0	0	0	0	0	0	0	0	0	0	0
	347	0	0	0	0	0	0	0	0	0	0	0	0	0	0	0	0	0	0	0	0									347	0	0	0	0	0	0	0	0	0	0	0	0	0	0	0	0	0	0	0
	348	0	0	0	0	0	0	0	0	0	0	0	0	0	0	0	0	0	0	0	0									348	0	0	0	0	0	0	0	0	0	0	0	0	0	0	0	0	0	0	0
	349	0	0	0	0	0	0	0	0	0	0	0	0	0	0	0	0	0	0	0	0									349	0	0	0	0	0	0	0	0	0	0	0	0	0	0	0	0	0	0	0
	350	0	0	0	0	0	0	0	0	0	0	0	0	0	0	0	0	0	0	0	0									350	0	0	0	0	0	0	0	0	0	0	0	0	0	0	0	0	0	0	0
	351	0	0	0	0	0	0	0	0	0	0	0	0	0	0	0	0	0	0	0	0									351	0	0	0	0	0	0	0	0	0	0	0	0	0	0	0	0	0	0	0
	352	0	0	0	0	0	0	0	0	0	0	0	0	0	0	0	0	0	0	0	0									352	0	0	0	0	0	0	0	0	0	0	0	0	0	0	0	0	0	0	0
	353	0	0	0	0	0	0	0	0	0	0	0	0	0	0	0	0	0	0	0	0									353	0	0	0	0	0	0	0	0	0	0	0	0	0	0	0	0	0	0	0
	354	0	0	0	0	0	0	0	0	0	0	0	0	0	0	0	0	0	0	0	0									354	0	0	0	0	0	0	0	0	0	0	0	0	0	0	0	0	0	0	0
	355	0	0	0	0	0	0	0	0	0	0	0	0	0	0	0	0	0	0	0	0									355	0	0	0	0	0	0	0	0	0	0	0	0	0	0	0	0	0	0	0
	356	0	0	0	0	0	0	0	0	0	0	0	0	0	0	0	0	0	0	0	0									356	0	0	0	0	0	0	0	0	0	0	0	0	0	0	0	0	0	0	0
	357	0	0	0	0	0	0	0	0	0	0	0	0	0	0	0	0	0	0	0	0									357	0	0	0	0	0	0	0	0	0	0	0	0	0	0	0	0	0	0	0
	358	0	0	0	0	0	0	0	0	0	0	0	0	0	0	0	0	0	0	0	0									358	0	0	0	0	0	0	0	0	0	0	0	0	0	0	0	0	0	0	0
	359	0	0	0	0	0	0	0	0	0	0	0	0	0	0	0	0	0	0	0	0									359	0	0	0	0	0	0	0	0	0	0	0	0	0	0	0	0	0	0	0
	360	0	0	0	0	0	0	0	0	0	0	0	0	0	0	0	0	0	0	0	0									360	0	0	0	0	0	0	0	0	0	0	0	0	0	0	0	0	0	0	0
	361	0	0	0	0	0	0	0	0	0	0	0	0	0	0	0	0	0	0	0	0									361	0	0	0	0	0	0	0	0	0	0	0	0	0	0	0	0	0	0	0
	362	0	0	0	0	0	0	0	0	0	0	0	0	0	0	0	0	0	0	0	0									362	0	0	0	0	0	0	0	0	0	0	0	0	0	0	0	0	0	0	0
	363	0	0	0	0	0	0	0	0	0	0	0	0	0	0	0	0	0	0	0	0									363	0	0	0	0	0	0	0	0	0	0	0	0	0	0	0	0	0	0	0
	364	0	0	0	0	0	0	0	0	0	0	0	0	0	0	0	0	0	0	0	0									364	0	0	0	0	0	0	0	0	0	0	0	0	0	0	0	0	0	0	0
	365	0	0	0	0	0	0	0	0	0	0	0	0	0	0	0	0	0	0	0	0									365	0	0	0	0	0	0	0	0	0	0	0	0	0	0	0	0	0	0	0
	366	0	0	0	0	0	0	0	0	0	0	0	0	0	0	0	0	0	0	0	0									366	0	0	0	0	0	0	0	0	0	0	0	0	0	0	0	0	0	0	0
	367	0	0	0	0	0	0	0	0	0	0	0	0	0	0	0	0	0	0	0	0									367	0	0	0	0	0	0	0	0	0	0	0	0	0	0	0	0	0	0	0
	368	0	0	0	0	0	0	0	0	0	0	0	0	0	0	0	0	0	0	0	0									368	0	0	0	0	0	0	0	0	0	0	0	0	0	0	0	0	0	0	0
	369	0	0	0	0	0	0	0	0	0	0	0	0	0	0	0	0	0	0	0	0									369	0	0	0	0	0	0	0	0	0	0	0	0	0	0	0	0	0	0	0
	370	0	0	0	0	0	0	0	0	0	0	0	0	0	0	0	0	0	0	0	0									370	0	0	0	0	0	0	0	0	0	0	0	0	0	0	0	0	0	0	0
	371	0	0	0	0	0	0	0	0	0	0	0	0	0	0	0	0	0	0	0	0									371	0	0	0	0	0	0	0	0	0	0	0	0	0	0	0	0	0	0	0
	372	0	0	0	0	0	0	0	0	0	0	0	0	0	0	0	0	0	0	0	0									372	0	0	0	0	0	0	0	0	0	0	0	0	0	0	0	0	0	0	0
	373	0	0	0	0	0	0	0	0	0	0	0	0	0	0	0	0	0	0	0	0									373	0	0	0	0	0	0	0	0	0	0	0	0	0	0	0	0	0	0	0
	374	0	0	0	0	0	0	0	0	0	0	0	0	0	0	0	0	0	0	0	0									374	0	0	0	0	0	0	0	0	0	0	0	0	0	0	0	0	0	0	0
	375	0	0	0	0	0	0	0	0	0	0	0	0	0	0	0	0	0	0	0	0									375	0	0	0	0	0	0	0	0	0	0	0	0	0	0	0	0	0	0	0
	376	0	0	0	0	0	0	0	0	0	0	0	0	0	0	0	0	0	0	0	0									376	0	0	0	0	0	0	0	0	0	0	0	0	0	0	0	0	0	0	0
	377	0	0	0	0	0	0	0	0	0	0	0	0	0	0	0	0	0	0	0	0									377	0	0	0	0	0	0	0	0	0	0	0	0	0	0	0	0	0	0	0
	378	0	0	0	0	0	0	0	0	0	0	0	0	0	0	0	0	0	0	0	0									378	0	0	0	0	0	0	0	0	0	0	0	0	0	0	0	0	0	0	0
	379	0	0	0	0	0	0	0	0	0	0	0	0	0	0	0	0	0	0	0	0									379	0	0	0	0	0	0	0	0	0	0	0	0	0	0	0	0	0	0	0
	380	0	0	0	0	0	0	0	0	0	0	0	0	0	0	0	0	0	0	0	0									380	0	0	0	0	0	0	0	0	0	0	0	0	0	0	0	0	0	0	0
	381	0	0	0	0	0	0	0	0	0	0	0	0	0	0	0	0	0	0	0	0									381	0	0	0	0	0	0	0	0	0	0	0	0	0	0	0	0	0	0	0
	382	0	0	0	0	0	0	0	0	0	0	0	0	0	0	0	0	0	0	0	0									382	0	0	0	0	0	0	0	0	0	0	0	0	0	0	0	0	0	0	0
	383	0	0	0	0	0	0	0	0	0	0	0	0	0	0	0	0	0	0	0	0									383	0	0	0	0	0	0	0	0	0	0	0	0	0	0	0	0	0	0	0
	384	0	0	0	0	0	0	0	0	0	0	0	0	0	0	0	0	0	0	0	0									384	0	0	0	0	0	0	0	0	0	0	0	0	0	0	0	0	0	0	0
	385	0	0	0	0	0	0	0	0	0	0	0	0	0	0	0	0	0	0	0	0									385	0	0	0	0	0	0	0	0	0	0	0	0	0	0	0	0	0	0	0
	386	0	0	0	0	0	0	0	0	0	0	0	0	0	0	0	0	0	0	0	0									386	0	0	0	0	0	0	0	0	0	0	0	0	0	0	0	0	0	0	0
	387	0	0	0	0	0	0	0	0	0	0	0	0	0	0	0	0	0	0	0	0									387	0	0	0	0	0	0	0	0	0	0	0	0	0	0	0	0	0	0	0
	388	0	0	0	0	0	0	0	0	0	0	0	0	0	0	0	0	0	0	0	0									388	0	0	0	0	0	0	0	0	0	0	0	0	0	0	0	0	0	0	0
	389	0	0	0	0	0	0	0	0	0	0	0	0	0	0	0	0	0	0	0	0									389	0	0	0	0	0	0	0	0	0	0	0	0	0	0	0	0	0	0	0
	390	0	0	0	0	0	0	0	0	0	0	0	0	0	0	0	0	0	0	0	0									390	0	0	0	0	0	0	0	0	0	0	0	0	0	0	0	0	0	0	0
	391	0	0	0	0	0	0	0	0	0	0	0	0	0	0	0	0	0	0	0	0									391	0	0	0	0	0	0	0	0	0	0	0	0	0	0	0	0	0	0	0
	392	0	0	0	0	0	0	0	0	0	0	0	0	0	0	0	0	0	0	0	0									392	0	0	0	0	0	0	0	0	0	0	0	0	0	0	0	0	0	0	0
	393	0	0	0	0	0	0	0	0	0	0	0	0	0	0	0	0	0	0	0	0									393	0	0	0	0	0	0	0	0	0	0	0	0	0	0	0	0	0	0	0
	394	0	0	0	0	0	0	0	0	0	0	0	0	0	0	0	0	0	0	0	0									394	0	0	0	0	0	0	0	0	0	0	0	0	0	0	0	0	0	0	0
	395	0	0	0	0	0	0	0	0	0	0	0	0	0	0	0	0	0	0	0	0									395	0	0	0	0	0	0	0	0	0	0	0	0	0	0	0	0	0	0	0
	396	0	0	0	0	0	0	0	0	0	0	0	0	0	0	0	0	0	0	0	0									396	0	0	0	0	0	0	0	0	0	0	0	0	0	0	0	0	0	0	0
	397	0	0	0	0	0	0	0	0	0	0	0	0	0	0	0	0	0	0	0	0									397	0	0	0	0	0	0	0	0	0	0	0	0	0	0	0	0	0	0	0
	398	0	0	0	0	0	0	0	0	0	0	0	0	0	0	0	0	0	0	0	0									398	0	0	0	0	0	0	0	0	0	0	0	0	0	0	0	0	0	0	0
	399	0	0	0	0	0	0	0	0	0	0	0	0	0	0	0	0	0	0	0	0									399	0	0	0	0	0	0	0	0	0	0	0	0	0	0	0	0	0	0	0
	400	0	0	0	0	0	0	0	0	0	0	0	0	0	0	0	0	0	0	0	0									400	0	0	0	0	0	0	0	0	0	0	0	0	0	0	0	0	0	0	0
	401	0	0	0	0	0	0	0	0	0	0	0	0	0	0	0	0	0	0	0	0									401	0	0	0	0	0	0	0	0	0	0	0	0	0	0	0	0	0	0	0
	402	0	0	0	0	0	0	0	0	0	0	0	0	0	0	0	0	0	0	0	0									402	0	0	0	0	0	0	0	0	0	0	0	0	0	0	0	0	0	0	0
	403	0	0	0	0	0	0	0	0	0	0	0	0	0	0	0	0	0	0	0	0									403	0	0	0	0	0	0	0	0	0	0	0	0	0	0	0	0	0	0	0
	404	0	0	0	0	0	0	0	0	0	0	0	0	0	0	0	0	0	0	0	0									404	0	0	0	0	0	0	0	0	0	0	0	0	0	0	0	0	0	0	0
	405	0	0	0	0	0	0	0	0	0	0	0	0	0	0	0	0	0	0	0	0									405	0	0	0	0	0	0	0	0	0	0	0	0	0	0	0	0	0	0	0
	406	0	0	0	0	0	0	0	0	0	0	0	0	0	0	0	0	0	0	0	0									406	0	0	0	0	0	0	0	0	0	0	0	0	0	0	0	0	0	0	0
	407	0	0	0	0	0	0	0	0	0	0	0	0	0	0	0	0	0	0	0	0									407	0	0	0	0	0	0	0	0	0	0	0	0	0	0	0	0	0	0	0
	408	0	0	0	0	0	0	0	0	0	0	0	0	0	0	0	0	0	0	0	0									408	0	0	0	0	0	0	0	0	0	0	0	0	0	0	0	0	0	0	0
	409	0	0	0	0	0	0	0	0	0	0	0	0	0	0	0	0	0	0	0	0									409	0	0	0	0	0	0	0	0	0	0	0	0	0	0	0	0	0	0	0
	410	0	0	0	0	0	0	0	0	0	0	0	0	0	0	0	0	0	0	0	0									410	0	0	0	0	0	0	0	0	0	0	0	0	0	0	0	0	0	0	0
	411	0	0	0	0	0	0	0	0	0	0	0	0	0	0	0	0	0	0	0	0									411	0	0	0	0	0	0	0	0	0	0	0	0	0	0	0	0	0	0	0
	412	0	0	0	0	0	0	0	0	0	0	0	0	0	0	0	0	0	0	0	0									412	0	0	0	0	0	0	0	0	0	0	0	0	0	0	0	0	0	0	0
	413	0	0	0	0	0	0	0	0	0	0	0	0	0	0	0	0	0	0	0	0									413	0	0	0	0	0	0	0	0	0	0	0	0	0	0	0	0	0	0	0
	414	0	0	0	0	0	0	0	0	0	0	0	0	0	0	0	0	0	0	0	0									414	0	0	0	0	0	0	0	0	0	0	0	0	0	0	0	0	0	0	0
	415	0	0	0	0	0	0	0	0	0	0	0	0	0	0	0	0	0	0	0	0									415	0	0	0	0	0	0	0	0	0	0	0	0	0	0	0	0	0	0	0
	416	0	0	0	0	0	0	0	0	0	0	0	0	0	0	0	0	0	0	0	0									416	0	0	0	0	0	0	0	0	0	0	0	0	0	0	0	0	0	0	0
	417	0	0	0	0	0	0	0	0	0	0	0	0	0	0	0	0	0	0	0	0									417	0	0	0	0	0	0	0	0	0	0	0	0	0	0	0	0	0	0	0
	418	0	0	0	0	0	0	0	0	0	0	0	0	0	0	0	0	0	0	0	0									418	0	0	0	0	0	0	0	0	0	0	0	0	0	0	0	0	0	0	0
	419	0	0	0	0	0	0	0	0	0	0	0	0	0	0	0	0	0	0	0	0									419	0	0	0	0	0	0	0	0	0	0	0	0	0	0	0	0	0	0	0
	420	0	0	0	0	0	0	0	0	0	0	0	0	0	0	0	0	0	0	0	0									420	0	0	0	0	0	0	0	0	0	0	0	0	0	0	0	0	0	0	0
	421	0	0	0	0	0	0	0	0	0	0	0	0	0	0	0	0	0	0	0	0									421	0	0	0	0	0	0	0	0	0	0	0	0	0	0	0	0	0	0	0
	422	0	0	0	0	0	0	0	0	0	0	0	0	0	0	0	0	0	0	0	0									422	0	0	0	0	0	0	0	0	0	0	0	0	0	0	0	0	0	0	0
	423	0	0	0	0	0	0	0	0	0	0	0	0	0	0	0	0	0	0	0	0									423	0	0	0	0	0	0	0	0	0	0	0	0	0	0	0	0	0	0	0
	424	0	0	0	0	0	0	0	0	0	0	0	0	0	0	0	0	0	0	0	0									424	0	0	0	0	0	0	0	0	0	0	0	0	0	0	0	0	0	0	0
	425	0	0	0	0	0	0	0	0	0	0	0	0	0	0	0	0	0	0	0	0									425	0	0	0	0	0	0	0	0	0	0	0	0	0	0	0	0	0	0	0
	426	0	0	0	0	0	0	0	0	0	0	0	0	0	0	0	0	0	0	0	0									426	0	0	0	0	0	0	0	0	0	0	0	0	0	0	0	0	0	0	0
	427	0	0	0	0	0	0	0	0	0	0	0	0	0	0	0	0	0	0	0	0									427	0	0	0	0	0	0	0	0	0	0	0	0	0	0	0	0	0	0	0
	428	0	0	0	0	0	0	0	0	0	0	0	0	0	0	0	0	0	0	0	0									428	0	0	0	0	0	0	0	0	0	0	0	0	0	0	0	0	0	0	0
	429	0	0	0	0	0	0	0	0	0	0	0	0	0	0	0	0	0	0	0	0									429	0	0	0	0	0	0	0	0	0	0	0	0	0	0	0	0	0	0	0
	430	0	0	0	0	0	0	0	0	0	0	0	0	0	0	0	0	0	0	0	0									430	0	0	0	0	0	0	0	0	0	0	0	0	0	0	0	0	0	0	0
	431	0	0	0	0	0	0	0	0	0	0	0	0	0	0	0	0	0	0	0	0									431	0	0	0	0	0	0	0	0	0	0	0	0	0	0	0	0	0	0	0
	432	0	0	0	0	0	0	0	0	0	0	0	0	0	0	0	0	0	0	0	0									432	0	0	0	0	0	0	0	0	0	0	0	0	0	0	0	0	0	0	0
	433	0	0	0	0	0	0	0	0	0	0	0	0	0	0	0	0	0	0	0	0									433	0	0	0	0	0	0	0	0	0	0	0	0	0	0	0	0	0	0	0
	434	0	0	0	0	0	0	0	0	0	0	0	0	0	0	0	0	0	0	0	0									434	0	0	0	0	0	0	0	0	0	0	0	0	0	0	0	0	0	0	0
	435	0	0	0	0	0	0	0	0	0	0	0	0	0	0	0	0	0	0	0	0									435	0	0	0	0	0	0	0	0	0	0	0	0	0	0	0	0	0	0	0
	436	0	0	0	0	0	0	0	0	0	0	0	0	0	0	0	0	0	0	0	0									436	0	0	0	0	0	0	0	0	0	0	0	0	0	0	0	0	0	0	0
	437	0	0	0	0	0	0	0	0	0	0	0	0	0	0	0	0	0	0	0	0									437	0	0	0	0	0	0	0	0	0	0	0	0	0	0	0	0	0	0	0
	438	0	0	0	0	0	0	0	0	0	0	0	0	0	0	0	0	0	0	0	0									438	0	0	0	0	0	0	0	0	0	0	0	0	0	0	0	0	0	0	0
	439	0	0	0	0	0	0	0	0	0	0	0	0	0	0	0	0	0	0	0	0									439	0	0	0	0	0	0	0	0	0	0	0	0	0	0	0	0	0	0	0
	440	0	0	0	0	0	0	0	0	0	0	0	0	0	0	0	0	0	0	0	0									440	0	0	0	0	0	0	0	0	0	0	0	0	0	0	0	0	0	0	0
	441	0	0	0	0	0	0	0	0	0	0	0	0	0	0	0	0	0	0	0	0									441	0	0	0	0	0	0	0	0	0	0	0	0	0	0	0	0	0	0	0
	442	0	0	0	0	0	0	0	0	0	0	0	0	0	0	0	0	0	0	0	0									442	0	0	0	0	0	0	0	0	0	0	0	0	0	0	0	0	0	0	0
	443	0	0	0	0	0	0	0	0	0	0	0	0	0	0	0	0	0	0	0	0									443	0	0	0	0	0	0	0	0	0	0	0	0	0	0	0	0	0	0	0
	444	0	0	0	0	0	0	0	0	0	0	0	0	0	0	0	0	0	0	0	0									444	0	0	0	0	0	0	0	0	0	0	0	0	0	0	0	0	0	0	0
	445	0	0	0	0	0	0	0	0	0	0	0	0	0	0	0	0	0	0	0	0									445	0	0	0	0	0	0	0	0	0	0	0	0	0	0	0	0	0	0	0
	446	0	0	0	0	0	0	0	0	0	0	0	0	0	0	0	0	0	0	0	0									446	0	0	0	0	0	0	0	0	0	0	0	0	0	0	0	0	0	0	0
	447	0	0	0	0	0	0	0	0	0	0	0	0	0	0	0	0	0	0	0	0									447	0	0	0	0	0	0	0	0	0	0	0	0	0	0	0	0	0	0	0
	448	0	0	0	0	0	0	0	0	0	0	0	0	0	0	0	0	0	0	0	0									448	0	0	0	0	0	0	0	0	0	0	0	0	0	0	0	0	0	0	0
	449	0	0	0	0	0	0	0	0	0	0	0	0	0	0	0	0	0	0	0	0									449	0	0	0	0	0	0	0	0	0	0	0	0	0	0	0	0	0	0	0
	450	0	0	0	0	0	0	0	0	0	0	0	0	0	0	0	0	0	0	0	0									450	0	0	0	0	0	0	0	0	0	0	0	0	0	0	0	0	0	0	0
	451	0	0	0	0	0	0	0	0	0	0	0	0	0	0	0	0	0	0	0	0									451	0	0	0	0	0	0	0	0	0	0	0	0	0	0	0	0	0	0	0
	452	0	0	0	0	0	0	0	0	0	0	0	0	0	0	0	0	0	0	0	0									452	0	0	0	0	0	0	0	0	0	0	0	0	0	0	0	0	0	0	0
	453	0	0	0	0	0	0	0	0	0	0	0	0	0	0	0	0	0	0	0	0									453	0	0	0	0	0	0	0	0	0	0	0	0	0	0	0	0	0	0	0
	454	0	0	0	0	0	0	0	0	0	0	0	0	0	0	0	0	0	0	0	0									454	0	0	0	0	0	0	0	0	0	0	0	0	0	0	0	0	0	0	0
	455	0	0	0	0	0	0	0	0	0	0	0	0	0	0	0	0	0	0	0	0									455	0	0	0	0	0	0	0	0	0	0	0	0	0	0	0	0	0	0	0
	456	0	0	0	0	0	0	0	0	0	0	0	0	0	0	0	0	0	0	0	0									456	0	0	0	0	0	0	0	0	0	0	0	0	0	0	0	0	0	0	0
	457	0	0	0	0	0	0	0	0	0	0	0	0	0	0	0	0	0	0	0	0									457	0	0	0	0	0	0	0	0	0	0	0	0	0	0	0	0	0	0	0
	458	0	0	0	0	0	0	0	0	0	0	0	0	0	0	0	0	0	0	0	0									458	0	0	0	0	0	0	0	0	0	0	0	0	0	0	0	0	0	0	0
	459	0	0	0	0	0	0	0	0	0	0	0	0	0	0	0	0	0	0	0	0									459	0	0	0	0	0	0	0	0	0	0	0	0	0	0	0	0	0	0	0
	460	0	0	0	0	0	0	0	0	0	0	0	0	0	0	0	0	0	0	0	0									460	0	0	0	0	0	0	0	0	0	0	0	0	0	0	0	0	0	0	0
	461	0	0	0	0	0	0	0	0	0	0	0	0	0	0	0	0	0	0	0	0									461	0	0	0	0	0	0	0	0	0	0	0	0	0	0	0	0	0	0	0
	462	0	0	0	0	0	0	0	0	0	0	0	0	0	0	0	0	0	0	0	0									462	0	0	0	0	0	0	0	0	0	0	0	0	0	0	0	0	0	0	0
	463	0	0	0	0	0	0	0	0	0	0	0	0	0	0	0	0	0	0	0	0									463	0	0	0	0	0	0	0	0	0	0	0	0	0	0	0	0	0	0	0
	464	0	0	0	0	0	0	0	0	0	0	0	0	0	0	0	0	0	0	0	0									464	0	0	0	0	0	0	0	0	0	0	0	0	0	0	0	0	0	0	0
	465	0	0	0	0	0	0	0	0	0	0	0	0	0	0	0	0	0	0	0	0									465	0	0	0	0	0	0	0	0	0	0	0	0	0	0	0	0	0	0	0
	466	0	0	0	0	0	0	0	0	0	0	0	0	0	0	0	0	0	0	0	0									466	0	0	0	0	0	0	0	0	0	0	0	0	0	0	0	0	0	0	0
	467	0	0	0	0	0	0	0	0	0	0	0	0	0	0	0	0	0	0	0	0									467	0	0	0	0	0	0	0	0	0	0	0	0	0	0	0	0	0	0	0
	468	0	0	0	0	0	0	0	0	0	0	0	0	0	0	0	0	0	0	0	0									468	0	0	0	0	0	0	0	0	0	0	0	0	0	0	0	0	0	0	0
	469	0	0	0	0	0	0	0	0	0	0	0	0	0	0	0	0	0	0	0	0									469	0	0	0	0	0	0	0	0	0	0	0	0	0	0	0	0	0	0	0
	470	0	0	0	0	0	0	0	0	0	0	0	0	0	0	0	0	0	0	0	0									470	0	0	0	0	0	0	0	0	0	0	0	0	0	0	0	0	0	0	0
	471	0	0	0	0	0	0	0	0	0	0	0	0	0	0	0	0	0	0	0	0									471	0	0	0	0	0	0	0	0	0	0	0	0	0	0	0	0	0	0	0
	472	0	0	0	0	0	0	0	0	0	0	0	0	0	0	0	0	0	0	0	0									472	0	0	0	0	0	0	0	0	0	0	0	0	0	0	0	0	0	0	0
	473	0	0	0	0	0	0	0	0	0	0	0	0	0	0	0	0	0	0	0	0									473	0	0	0	0	0	0	0	0	0	0	0	0	0	0	0	0	0	0	0
	474	0	0	0	0	0	0	0	0	0	0	0	0	0	0	0	0	0	0	0	0									474	0	0	0	0	0	0	0	0	0	0	0	0	0	0	0	0	0	0	0
	475	0	0	0	0	0	0	0	0	0	0	0	0	0	0	0	0	0	0	0	0									475	0	0	0	0	0	0	0	0	0	0	0	0	0	0	0	0	0	0	0
	476	0	0	0	0	0	0	0	0	0	0	0	0	0	0	0	0	0	0	0	0									476	0	0	0	0	0	0	0	0	0	0	0	0	0	0	0	0	0	0	0
	477	0	0	0	0	0	0	0	0	0	0	0	0	0	0	0	0	0	0	0	0									477	0	0	0	0	0	0	0	0	0	0	0	0	0	0	0	0	0	0	0
	478	0	0	0	0	0	0	0	0	0	0	0	0	0	0	0	0	0	0	0	0									478	0	0	0	0	0	0	0	0	0	0	0	0	0	0	0	0	0	0	0
	479	0	0	0	0	0	0	0	0	0	0	0	0	0	0	0	0	0	0	0	0									479	0	0	0	0	0	0	0	0	0	0	0	0	0	0	0	0	0	0	0
	480	0	0	0	0	0	0	0	0	0	0	0	0	0	0	0	0	0	0	0	0									480	0	0	0	0	0	0	0	0	0	0	0	0	0	0	0	0	0	0	0
	481	0	0	0	0	0	0	0	0	0	0	0	0	0	0	0	0	0	0	0	0									481	0	0	0	0	0	0	0	0	0	0	0	0	0	0	0	0	0	0	0
	482	0	0	0	0	0	0	0	0	0	0	0	0	0	0	0	0	0	0	0	0									482	0	0	0	0	0	0	0	0	0	0	0	0	0	0	0	0	0	0	0
	483	0	0	0	0	0	0	0	0	0	0	0	0	0	0	0	0	0	0	0	0									483	0	0	0	0	0	0	0	0	0	0	0	0	0	0	0	0	0	0	0
	484	0	0	0	0	0	0	0	0	0	0	0	0	0	0	0	0	0	0	0	0									484	0	0	0	0	0	0	0	0	0	0	0	0	0	0	0	0	0	0	0
	485	0	0	0	0	0	0	0	0	0	0	0	0	0	0	0	0	0	0	0	0									485	0	0	0	0	0	0	0	0	0	0	0	0	0	0	0	0	0	0	0
	486	0	0	0	0	0	0	0	0	0	0	0	0	0	0	0	0	0	0	0	0									486	0	0	0	0	0	0	0	0	0	0	0	0	0	0	0	0	0	0	0
	487	0	0	0	0	0	0	0	0	0	0	0	0	0	0	0	0	0	0	0	0									487	0	0	0	0	0	0	0	0	0	0	0	0	0	0	0	0	0	0	0
	488	0	0	0	0	0	0	0	0	0	0	0	0	0	0	0	0	0	0	0	0									488	0	0	0	0	0	0	0	0	0	0	0	0	0	0	0	0	0	0	0
	489	0	0	0	0	0	0	0	0	0	0	0	0	0	0	0	0	0	0	0	0									489	0	0	0	0	0	0	0	0	0	0	0	0	0	0	0	0	0	0	0
	490	0	0	0	0	0	0	0	0	0	0	0	0	0	0	0	0	0	0	0	0									490	0	0	0	0	0	0	0	0	0	0	0	0	0	0	0	0	0	0	0
	491	0	0	0	0	0	0	0	0	0	0	0	0	0	0	0	0	0	0	0	0									491	0	0	0	0	0	0	0	0	0	0	0	0	0	0	0	0	0	0	0
	492	0	0	0	0	0	0	0	0	0	0	0	0	0	0	0	0	0	0	0	0									492	0	0	0	0	0	0	0	0	0	0	0	0	0	0	0	0	0	0	0
	493	0	0	0	0	0	0	0	0	0	0	0	0	0	0	0	0	0	0	0	0									493	0	0	0	0	0	0	0	0	0	0	0	0	0	0	0	0	0	0	0
	494	0	0	0	0	0	0	0	0	0	0	0	0	0	0	0	0	0	0	0	0									494	0	0	0	0	0	0	0	0	0	0	0	0	0	0	0	0	0	0	0
	495	0	0	0	0	0	0	0	0	0	0	0	0	0	0	0	0	0	0	0	0									495	0	0	0	0	0	0	0	0	0	0	0	0	0	0	0	0	0	0	0
	496	0	0	0	0	0	0	0	0	0	0	0	0	0	0	0	0	0	0	0	0									496	0	0	0	0	0	0	0	0	0	0	0	0	0	0	0	0	0	0	0
	497	0	0	0	0	0	0	0	0	0	0	0	0	0	0	0	0	0	0	0	0									497	0	0	0	0	0	0	0	0	0	0	0	0	0	0	0	0	0	0	0
	498	0	0	0	0	0	0	0	0	0	0	0	0	0	0	0	0	0	0	0	0									498	0	0	0	0	0	0	0	0	0	0	0	0	0	0	0	0	0	0	0
	499	0	0	0	0	0	0	0	0	0	0	0	0	0	0	0	0	0	0	0	0									499	0	0	0	0	0	0	0	0	0	0	0	0	0	0	0	0	0	0	0
	500	0	0	0	0	0	0	0	0	0	0	0	0	0	0	0	0	0	0	0	0									500	0	0	0	0	0	0	0	0	0	0	0	0	0	0	0	0	0	0	0
	501	0	0	0	0	0	0	0	0	0	0	0	0	0	0	0	0	0	0	0	0									501	0	0	0	0	0	0	0	0	0	0	0	0	0	0	0	0	0	0	0
	502	0	0	0	0	0	0	0	0	0	0	0	0	0	0	0	0	0	0	0	0									502	0	0	0	0	0	0	0	0	0	0	0	0	0	0	0	0	0	0	0
	503	0	0	0	0	0	0	0	0	0	0	0	0	0	0	0	0	0	0	0	0									503	0	0	0	0	0	0	0	0	0	0	0	0	0	0	0	0	0	0	0
	504	0	0	0	0	0	0	0	0	0	0	0	0	0	0	0	0	0	0	0	0									504	0	0	0	0	0	0	0	0	0	0	0	0	0	0	0	0	0	0	0
	505	0	0	0	0	0	0	0	0	0	0	0	0	0	0	0	0	0	0	0	0									505	0	0	0	0	0	0	0	0	0	0	0	0	0	0	0	0	0	0	0
	506	0	0	0	0	0	0	0	0	0	0	0	0	0	0	0	0	0	0	0	0									506	0	0	0	0	0	0	0	0	0	0	0	0	0	0	0	0	0	0	0
	507	0	0	0	0	0	0	0	0	0	0	0	0	0	0	0	0	0	0	0	0									507	0	0	0	0	0	0	0	0	0	0	0	0	0	0	0	0	0	0	0
	508	0	0	0	0	0	0	0	0	0	0	0	0	0	0	0	0	0	0	0	0									508	0	0	0	0	0	0	0	0	0	0	0	0	0	0	0	0	0	0	0
	509	0	0	0	0	0	0	0	0	0	0	0	0	0	0	0	0	0	0	0	0									509	0	0	0	0	0	0	0	0	0	0	0	0	0	0	0	0	0	0	0
	510	0	0	0	0	0	0	0	0	0	0	0	0	0	0	0	0	0	0	0	0									510	0	0	0	0	0	0	0	0	0	0	0	0	0	0	0	0	0	0	0
	511	0	0	0	0	0	0	0	0	0	0	0	0	0	0	0	0	0	0	0	0									511	0	0	0	0	0	0	0	0	0	0	0	0	0	0	0	0	0	0	0
	512	0	0	0	0	0	0	0	0	0	0	0	0	0	0	0	0	0	0	0	0									512	0	0	0	0	0	0	0	0	0	0	0	0	0	0	0	0	0	0	0
	513	0	0	0	0	0	0	0	0	0	0	0	0	0	0	0	0	0	0	0	0									513	0	0	0	0	0	0	0	0	0	0	0	0	0	0	0	0	0	0	0
	514	0	0	0	0	0	0	0	0	0	0	0	0	0	0	0	0	0	0	0	0									514	0	0	0	0	0	0	0	0	0	0	0	0	0	0	0	0	0	0	0
	515	0	0	0	0	0	0	0	0	0	0	0	0	0	0	0	0	0	0	0	0									515	0	0	0	0	0	0	0	0	0	0	0	0	0	0	0	0	0	0	0
	516	0	0	0	0	0	0	0	0	0	0	0	0	0	0	0	0	0	0	0	0									516	0	0	0	0	0	0	0	0	0	0	0	0	0	0	0	0	0	0	0
	517	0	0	0	0	0	0	0	0	0	0	0	0	0	0	0	0	0	0	0	0									517	0	0	0	0	0	0	0	0	0	0	0	0	0	0	0	0	0	0	0
	518	0	0	0	0	0	0	0	0	0	0	0	0	0	0	0	0	0	0	0	0									518	0	0	0	0	0	0	0	0	0	0	0	0	0	0	0	0	0	0	0
	519	0	0	0	0	0	0	0	0	0	0	0	0	0	0	0	0	0	0	0	0									519	0	0	0	0	0	0	0	0	0	0	0	0	0	0	0	0	0	0	0
	520	0	0	0	0	0	0	0	0	0	0	0	0	0	0	0	0	0	0	0	0									520	0	0	0	0	0	0	0	0	0	0	0	0	0	0	0	0	0	0	0
	521	0	0	0	0	0	0	0	0	0	0	0	0	0	0	0	0	0	0	0	0									521	0	0	0	0	0	0	0	0	0	0	0	0	0	0	0	0	0	0	0
	522	0	0	0	0	0	0	0	0	0	0	0	0	0	0	0	0	0	0	0	0									522	0	0	0	0	0	0	0	0	0	0	0	0	0	0	0	0	0	0	0
	523	0	0	0	0	0	0	0	0	0	0	0	0	0	0	0	0	0	0	0	0									523	0	0	0	0	0	0	0	0	0	0	0	0	0	0	0	0	0	0	0
	524	0	0	0	0	0	0	0	0	0	0	0	0	0	0	0	0	0	0	0	0									524	0	0	0	0	0	0	0	0	0	0	0	0	0	0	0	0	0	0	0
	525	0	0	0	0	0	0	0	0	0	0	0	0	0	0	0	0	0	0	0	0									525	0	0	0	0	0	0	0	0	0	0	0	0	0	0	0	0	0	0	0
	526	0	0	0	0	0	0	0	0	0	0	0	0	0	0	0	0	0	0	0	0									526	0	0	0	0	0	0	0	0	0	0	0	0	0	0	0	0	0	0	0
	527	0	0	0	0	0	0	0	0	0	0	0	0	0	0	0	0	0	0	0	0									527	0	0	0	0	0	0	0	0	0	0	0	0	0	0	0	0	0	0	0
	528	0	0	0	0	0	0	0	0	0	0	0	0	0	0	0	0	0	0	0	0									528	0	0	0	0	0	0	0	0	0	0	0	0	0	0	0	0	0	0	0
	529	0	0	0	0	0	0	0	0	0	0	0	0	0	0	0	0	0	0	0	0									529	0	0	0	0	0	0	0	0	0	0	0	0	0	0	0	0	0	0	0
	530	0	0	0	0	0	0	0	0	0	0	0	0	0	0	0	0	0	0	0	0									530	0	0	0	0	0	0	0	0	0	0	0	0	0	0	0	0	0	0	0
	531	0	0	0	0	0	0	0	0	0	0	0	0	0	0	0	0	0	0	0	0									531	0	0	0	0	0	0	0	0	0	0	0	0	0	0	0	0	0	0	0
	532	0	0	0	0	0	0	0	0	0	0	0	0	0	0	0	0	0	0	0	0									532	0	0	0	0	0	0	0	0	0	0	0	0	0	0	0	0	0	0	0
	533	0	0	0	0	0	0	0	0	0	0	0	0	0	0	0	0	0	0	0	0									533	0	0	0	0	0	0	0	0	0	0	0	0	0	0	0	0	0	0	0
	534	0	0	0	0	0	0	0	0	0	0	0	0	0	0	0	0	0	0	0	0									534	0	0	0	0	0	0	0	0	0	0	0	0	0	0	0	0	0	0	0
	535	0	0	0	0	0	0	0	0	0	0	0	0	0	0	0	0	0	0	0	0									535	0	0	0	0	0	0	0	0	0	0	0	0	0	0	0	0	0	0	0
	536	0	0	0	0	0	0	0	0	0	0	0	0	0	0	0	0	0	0	0	0									536	0	0	0	0	0	0	0	0	0	0	0	0	0	0	0	0	0	0	0
	537	0	0	0	0	0	0	0	0	0	0	0	0	0	0	0	0	0	0	0	0									537	0	0	0	0	0	0	0	0	0	0	0	0	0	0	0	0	0	0	0
	538	0	0	0	0	0	0	0	0	0	0	0	0	0	0	0	0	0	0	0	0									538	0	0	0	0	0	0	0	0	0	0	0	0	0	0	0	0	0	0	0
	539	0	0	0	0	0	0	0	0	0	0	0	0	0	0	0	0	0	0	0	0									539	0	0	0	0	0	0	0	0	0	0	0	0	0	0	0	0	0	0	0
	540	0	0	0	0	0	0	0	0	0	0	0	0	0	0	0	0	0	0	0	0									540	0	0	0	0	0	0	0	0	0	0	0	0	0	0	0	0	0	0	0
	541	0	0	0	0	0	0	0	0	0	0	0	0	0	0	0	0	0	0	0	0									541	0	0	0	0	0	0	0	0	0	0	0	0	0	0	0	0	0	0	0
	542	0	0	0	0	0	0	0	0	0	0	0	0	0	0	0	0	0	0	0	0									542	0	0	0	0	0	0	0	0	0	0	0	0	0	0	0	0	0	0	0
	543	0	0	0	0	0	0	0	0	0	0	0	0	0	0	0	0	0	0	0	0									543	0	0	0	0	0	0	0	0	0	0	0	0	0	0	0	0	0	0	0
	544	0	0	0	0	0	0	0	0	0	0	0	0	0	0	0	0	0	0	0	0									544	0	0	0	0	0	0	0	0	0	0	0	0	0	0	0	0	0	0	0
	545	0	0	0	0	0	0	0	0	0	0	0	0	0	0	0	0	0	0	0	0									545	0	0	0	0	0	0	0	0	0	0	0	0	0	0	0	0	0	0	0
	546	0	0	0	0	0	0	0	0	0	0	0	0	0	0	0	0	0	0	0	0									546	0	0	0	0	0	0	0	0	0	0	0	0	0	0	0	0	0	0	0
	547	0	0	0	0	0	0	0	0	0	0	0	0	0	0	0	0	0	0	0	0									547	0	0	0	0	0	0	0	0	0	0	0	0	0	0	0	0	0	0	0
	548	0	0	0	0	0	0	0	0	0	0	0	0	0	0	0	0	0	0	0	0									548	0	0	0	0	0	0	0	0	0	0	0	0	0	0	0	0	0	0	0
	549	0	0	0	0	0	0	0	0	0	0	0	0	0	0	0	0	0	0	0	0									549	0	0	0	0	0	0	0	0	0	0	0	0	0	0	0	0	0	0	0
	550	0	0	0	0	0	0	0	0	0	0	0	0	0	0	0	0	0	0	0	0									550	0	0	0	0	0	0	0	0	0	0	0	0	0	0	0	0	0	0	0
	551	0	0	0	0	0	0	0	0	0	0	0	0	0	0	0	0	0	0	0	0									551	0	0	0	0	0	0	0	0	0	0	0	0	0	0	0	0	0	0	0
	552	0	0	0	0	0	0	0	0	0	0	0	0	0	0	0	0	0	0	0	0									552	0	0	0	0	0	0	0	0	0	0	0	0	0	0	0	0	0	0	0
	553	0	0	0	0	0	0	0	0	0	0	0	0	0	0	0	0	0	0	0	0									553	0	0	0	0	0	0	0	0	0	0	0	0	0	0	0	0	0	0	0
	554	0	0	0	0	0	0	0	0	0	0	0	0	0	0	0	0	0	0	0	0									554	0	0	0	0	0	0	0	0	0	0	0	0	0	0	0	0	0	0	0
	555	0	0	0	0	0	0	0	0	0	0	0	0	0	0	0	0	0	0	0	0									555	0	0	0	0	0	0	0	0	0	0	0	0	0	0	0	0	0	0	0
	556	0	0	0	0	0	0	0	0	0	0	0	0	0	0	0	0	0	0	0	0									556	0	0	0	0	0	0	0	0	0	0	0	0	0	0	0	0	0	0	0
	557	0	0	0	0	0	0	0	0	0	0	0	0	0	0	0	0	0	0	0	0									557	0	0	0	0	0	0	0	0	0	0	0	0	0	0	0	0	0	0	0
	558	0	0	0	0	0	0	0	0	0	0	0	0	0	0	0	0	0	0	0	0									558	0	0	0	0	0	0	0	0	0	0	0	0	0	0	0	0	0	0	0
	559	0	0	0	0	0	0	0	0	0	0	0	0	0	0	0	0	0	0	0	0									559	0	0	0	0	0	0	0	0	0	0	0	0	0	0	0	0	0	0	0
	560	0	0	0	0	0	0	0	0	0	0	0	0	0	0	0	0	0	0	0	0									560	0	0	0	0	0	0	0	0	0	0	0	0	0	0	0	0	0	0	0
	561	0	0	0	0	0	0	0	0	0	0	0	0	0	0	0	0	0	0	0	0									561	0	0	0	0	0	0	0	0	0	0	0	0	0	0	0	0	0	0	0
	562	0	0	0	0	0	0	0	0	0	0	0	0	0	0	0	0	0	0	0	0									562	0	0	0	0	0	0	0	0	0	0	0	0	0	0	0	0	0	0	0
	563	0	0	0	0	0	0	0	0	0	0	0	0	0	0	0	0	0	0	0	0									563	0	0	0	0	0	0	0	0	0	0	0	0	0	0	0	0	0	0	0
	564	0	0	0	0	0	0	0	0	0	0	0	0	0	0	0	0	0	0	0	0									564	0	0	0	0	0	0	0	0	0	0	0	0	0	0	0	0	0	0	0
	565	0	0	0	0	0	0	0	0	0	0	0	0	0	0	0	0	0	0	0	0									565	0	0	0	0	0	0	0	0	0	0	0	0	0	0	0	0	0	0	0
	566	0	0	0	0	0	0	0	0	0	0	0	0	0	0	0	0	0	0	0	0									566	0	0	0	0	0	0	0	0	0	0	0	0	0	0	0	0	0	0	0
	567	0	0	0	0	0	0	0	0	0	0	0	0	0	0	0	0	0	0	0	0									567	0	0	0	0	0	0	0	0	0	0	0	0	0	0	0	0	0	0	0
	568	0	0	0	0	0	0	0	0	0	0	0	0	0	0	0	0	0	0	0	0									568	0	0	0	0	0	0	0	0	0	0	0	0	0	0	0	0	0	0	0
	569	0	0	0	0	0	0	0	0	0	0	0	0	0	0	0	0	0	0	0	0									569	0	0	0	0	0	0	0	0	0	0	0	0	0	0	0	0	0	0	0
	570	0	0	0	0	0	0	0	0	0	0	0	0	0	0	0	0	0	0	0	0									570	0	0	0	0	0	0	0	0	0	0	0	0	0	0	0	0	0	0	0
	571	0	0	0	0	0	0	0	0	0	0	0	0	0	0	0	0	0	0	0	0									571	0	0	0	0	0	0	0	0	0	0	0	0	0	0	0	0	0	0	0
	572	0	0	0	0	0	0	0	0	0	0	0	0	0	0	0	0	0	0	0	0									572	0	0	0	0	0	0	0	0	0	0	0	0	0	0	0	0	0	0	0
	573	0	0	0	0	0	0	0	0	0	0	0	0	0	0	0	0	0	0	0	0									573	0	0	0	0	0	0	0	0	0	0	0	0	0	0	0	0	0	0	0
	574	0	0	0	0	0	0	0	0	0	0	0	0	0	0	0	0	0	0	0	0									574	0	0	0	0	0	0	0	0	0	0	0	0	0	0	0	0	0	0	0
	575	0	0	0	0	0	0	0	0	0	0	0	0	0	0	0	0	0	0	0	0									575	0	0	0	0	0	0	0	0	0	0	0	0	0	0	0	0	0	0	0
	576	0	0	0	0	0	0	0	0	0	0	0	0	0	0	0	0	0	0	0	0									576	0	0	0	0	0	0	0	0	0	0	0	0	0	0	0	0	0	0	0
	577	0	0	0	0	0	0	0	0	0	0	0	0	0	0	0	0	0	0	0	0									577	0	0	0	0	0	0	0	0	0	0	0	0	0	0	0	0	0	0	0
	578	0	0	0	0	0	0	0	0	0	0	0	0	0	0	0	0	0	0	0	0									578	0	0	0	0	0	0	0	0	0	0	0	0	0	0	0	0	0	0	0
	579	0	0	0	0	0	0	0	0	0	0	0	0	0	0	0	0	0	0	0	0									579	0	0	0	0	0	0	0	0	0	0	0	0	0	0	0	0	0	0	0
	580	0	0	0	0	0	0	0	0	0	0	0	0	0	0	0	0	0	0	0	0									580	0	0	0	0	0	0	0	0	0	0	0	0	0	0	0	0	0	0	0
	581	0	0	0	0	0	0	0	0	0	0	0	0	0	0	0	0	0	0	0	0									581	0	0	0	0	0	0	0	0	0	0	0	0	0	0	0	0	0	0	0
	582	0	0	0	0	0	0	0	0	0	0	0	0	0	0	0	0	0	0	0	0									582	0	0	0	0	0	0	0	0	0	0	0	0	0	0	0	0	0	0	0
	583	0	0	0	0	0	0	0	0	0	0	0	0	0	0	0	0	0	0	0	0									583	0	0	0	0	0	0	0	0	0	0	0	0	0	0	0	0	0	0	0
	584	0	0	0	0	0	0	0	0	0	0	0	0	0	0	0	0	0	0	0	0									584	0	0	0	0	0	0	0	0	0	0	0	0	0	0	0	0	0	0	0
	585	0	0	0	0	0	0	0	0	0	0	0	0	0	0	0	0	0	0	0	0									585	0	0	0	0	0	0	0	0	0	0	0	0	0	0	0	0	0	0	0
	586	0	0	0	0	0	0	0	0	0	0	0	0	0	0	0	0	0	0	0	0									586	0	0	0	0	0	0	0	0	0	0	0	0	0	0	0	0	0	0	0
	587	0	0	0	0	0	0	0	0	0	0	0	0	0	0	0	0	0	0	0	0									587	0	0	0	0	0	0	0	0	0	0	0	0	0	0	0	0	0	0	0
	588	0	0	0	0	0	0	0	0	0	0	0	0	0	0	0	0	0	0	0	0									588	0	0	0	0	0	0	0	0	0	0	0	0	0	0	0	0	0	0	0
	589	0	0	0	0	0	0	0	0	0	0	0	0	0	0	0	0	0	0	0	0									589	0	0	0	0	0	0	0	0	0	0	0	0	0	0	0	0	0	0	0
	590	0	0	0	0	0	0	0	0	0	0	0	0	0	0	0	0	0	0	0	0									590	0	0	0	0	0	0	0	0	0	0	0	0	0	0	0	0	0	0	0
	591	0	0	0	0	0	0	0	0	0	0	0	0	0	0	0	0	0	0	0	0									591	0	0	0	0	0	0	0	0	0	0	0	0	0	0	0	0	0	0	0
	592	0	0	0	0	0	0	0	0	0	0	0	0	0	0	0	0	0	0	0	0									592	0	0	0	0	0	0	0	0	0	0	0	0	0	0	0	0	0	0	0
	593	0	0	0	0	0	0	0	0	0	0	0	0	0	0	0	0	0	0	0	0									593	0	0	0	0	0	0	0	0	0	0	0	0	0	0	0	0	0	0	0
	594	0	0	0	0	0	0	0	0	0	0	0	0	0	0	0	0	0	0	0	0									594	0	0	0	0	0	0	0	0	0	0	0	0	0	0	0	0	0	0	0
	595	0	0	0	0	0	0	0	0	0	0	0	0	0	0	0	0	0	0	0	0									595	0	0	0	0	0	0	0	0	0	0	0	0	0	0	0	0	0	0	0
	596	0	0	0	0	0	0	0	0	0	0	0	0	0	0	0	0	0	0	0	0									596	0	0	0	0	0	0	0	0	0	0	0	0	0	0	0	0	0	0	0
	597	0	0	0	0	0	0	0	0	0	0	0	0	0	0	0	0	0	0	0	0									597	0	0	0	0	0	0	0	0	0	0	0	0	0	0	0	0	0	0	0
	598	0	0	0	0	0	0	0	0	0	0	0	0	0	0	0	0	0	0	0	0									598	0	0	0	0	0	0	0	0	0	0	0	0	0	0	0	0	0	0	0
	599	0	0	0	0	0	0	0	0	0	0	0	0	0	0	0	0	0	0	0	0									599	0	0	0	0	0	0	0	0	0	0	0	0	0	0	0	0	0	0	0
	600	0	0	0	0	0	0	0	0	0	0	0	0	0	0	0	0	0	0	0	0									600	0	0	0	0	0	0	0	0	0	0	0	0	0	0	0	0	0	0	0
	601	0	0	0	0	0	0	0	0	0	0	0	0	0	0	0	0	0	0	0	0									601	0	0	0	0	0	0	0	0	0	0	0	0	0	0	0	0	0	0	0
	602	0	0	0	0	0	0	0	0	0	0	0	0	0	0	0	0	0	0	0	0									602	0	0	0	0	0	0	0	0	0	0	0	0	0	0	0	0	0	0	0
	603	0	0	0	0	0	0	0	0	0	0	0	0	0	0	0	0	0	0	0	0									603	0	0	0	0	0	0	0	0	0	0	0	0	0	0	0	0	0	0	0
	604	0	0	0	0	0	0	0	0	0	0	0	0	0	0	0	0	0	0	0	0									604	0	0	0	0	0	0	0	0	0	0	0	0	0	0	0	0	0	0	0
	605	0	0	0	0	0	0	0	0	0	0	0	0	0	0	0	0	0	0	0	0									605	0	0	0	0	0	0	0	0	0	0	0	0	0	0	0	0	0	0	0
	606	0	0	0	0	0	0	0	0	0	0	0	0	0	0	0	0	0	0	0	0									606	0	0	0	0	0	0	0	0	0	0	0	0	0	0	0	0	0	0	0
	607	0	0	0	0	0	0	0	0	0	0	0	0	0	0	0	0	0	0	0	0									607	0	0	0	0	0	0	0	0	0	0	0	0	0	0	0	0	0	0	0
	608	0	0	0	0	0	0	0	0	0	0	0	0	0	0	0	0	0	0	0	0									608	0	0	0	0	0	0	0	0	0	0	0	0	0	0	0	0	0	0	0
	609	0	0	0	0	0	0	0	0	0	0	0	0	0	0	0	0	0	0	0	0									609	0	0	0	0	0	0	0	0	0	0	0	0	0	0	0	0	0	0	0
	610	0	0	0	0	0	0	0	0	0	0	0	0	0	0	0	0	0	0	0	0									610	0	0	0	0	0	0	0	0	0	0	0	0	0	0	0	0	0	0	0
	611	0	0	0	0	0	0	0	0	0	0	0	0	0	0	0	0	0	0	0	0									611	0	0	0	0	0	0	0	0	0	0	0	0	0	0	0	0	0	0	0
	612	0	0	0	0	0	0	0	0	0	0	0	0	0	0	0	0	0	0	0	0									612	0	0	0	0	0	0	0	0	0	0	0	0	0	0	0	0	0	0	0
	613	0	0	0	0	0	0	0	0	0	0	0	0	0	0	0	0	0	0	0	0									613	0	0	0	0	0	0	0	0	0	0	0	0	0	0	0	0	0	0	0
	614	0	0	0	0	0	0	0	0	0	0	0	0	0	0	0	0	0	0	0	0									614	0	0	0	0	0	0	0	0	0	0	0	0	0	0	0	0	0	0	0
	615	0	0	0	0	0	0	0	0	0	0	0	0	0	0	0	0	0	0	0	0									615	0	0	0	0	0	0	0	0	0	0	0	0	0	0	0	0	0	0	0
	616	0	0	0	0	0	0	0	0	0	0	0	0	0	0	0	0	0	0	0	0									616	0	0	0	0	0	0	0	0	0	0	0	0	0	0	0	0	0	0	0
	617	0	0	0	0	0	0	0	0	0	0	0	0	0	0	0	0	0	0	0	0									617	0	0	0	0	0	0	0	0	0	0	0	0	0	0	0	0	0	0	0
	618	0	0	0	0	0	0	0	0	0	0	0	0	0	0	0	0	0	0	0	0									618	0	0	0	0	0	0	0	0	0	0	0	0	0	0	0	0	0	0	0
	619	0	0	0	0	0	0	0	0	0	0	0	0	0	0	0	0	0	0	0	0									619	0	0	0	0	0	0	0	0	0	0	0	0	0	0	0	0	0	0	0
	620	0	0	0	0	0	0	0	0	0	0	0	0	0	0	0	0	0	0	0	0									620	0	0	0	0	0	0	0	0	0	0	0	0	0	0	0	0	0	0	0
	621	0	0	0	0	0	0	0	0	0	0	0	0	0	0	0	0	0	0	0	0									621	0	0	0	0	0	0	0	0	0	0	0	0	0	0	0	0	0	0	0
	622	0	0	0	0	0	0	0	0	0	0	0	0	0	0	0	0	0	0	0	0									622	0	0	0	0	0	0	0	0	0	0	0	0	0	0	0	0	0	0	0
	623	0	0	0	0	0	0	0	0	0	0	0	0	0	0	0	0	0	0	0	0									623	0	0	0	0	0	0	0	0	0	0	0	0	0	0	0	0	0	0	0
	624	0	0	0	0	0	0	0	0	0	0	0	0	0	0	0	0	0	0	0	0									624	0	0	0	0	0	0	0	0	0	0	0	0	0	0	0	0	0	0	0
	625	0	0	0	0	0	0	0	0	0	0	0	0	0	0	0	0	0	0	0	0									625	0	0	0	0	0	0	0	0	0	0	0	0	0	0	0	0	0	0	0
	626	0	0	0	0	0	0	0	0	0	0	0	0	0	0	0	0	0	0	0	0									626	0	0	0	0	0	0	0	0	0	0	0	0	0	0	0	0	0	0	0
	627	0	0	0	0	0	0	0	0	0	0	0	0	0	0	0	0	0	0	0	0									627	0	0	0	0	0	0	0	0	0	0	0	0	0	0	0	0	0	0	0
	628	0	0	0	0	0	0	0	0	0	0	0	0	0	0	0	0	0	0	0	0									628	0	0	0	0	0	0	0	0	0	0	0	0	0	0	0	0	0	0	0
	629	0	0	0	0	0	0	0	0	0	0	0	0	0	0	0	0	0	0	0	0									629	0	0	0	0	0	0	0	0	0	0	0	0	0	0	0	0	0	0	0
	630	0	0	0	0	0	0	0	0	0	0	0	0	0	0	0	0	0	0	0	0									630	0	0	0	0	0	0	0	0	0	0	0	0	0	0	0	0	0	0	0
	631	0	0	0	0	0	0	0	0	0	0	0	0	0	0	0	0	0	0	0	0									631	0	0	0	0	0	0	0	0	0	0	0	0	0	0	0	0	0	0	0
	632	0	0	0	0	0	0	0	0	0	0	0	0	0	0	0	0	0	0	0	0									632	0	0	0	0	0	0	0	0	0	0	0	0	0	0	0	0	0	0	0
	633	0	0	0	0	0	0	0	0	0	0	0	0	0	0	0	0	0	0	0	0									633	0	0	0	0	0	0	0	0	0	0	0	0	0	0	0	0	0	0	0
	634	0	0	0	0	0	0	0	0	0	0	0	0	0	0	0	0	0	0	0	0									634	0	0	0	0	0	0	0	0	0	0	0	0	0	0	0	0	0	0	0
	635	0	0	0	0	0	0	0	0	0	0	0	0	0	0	0	0	0	0	0	0									635	0	0	0	0	0	0	0	0	0	0	0	0	0	0	0	0	0	0	0
	636	0	0	0	0	0	0	0	0	0	0	0	0	0	0	0	0	0	0	0	0									636	0	0	0	0	0	0	0	0	0	0	0	0	0	0	0	0	0	0	0
	637	0	0	0	0	0	0	0	0	0	0	0	0	0	0	0	0	0	0	0	0									637	0	0	0	0	0	0	0	0	0	0	0	0	0	0	0	0	0	0	0
	638	0	0	0	0	0	0	0	0	0	0	0	0	0	0	0	0	0	0	0	0									638	0	0	0	0	0	0	0	0	0	0	0	0	0	0	0	0	0	0	0
	639	0	0	0	0	0	0	0	0	0	0	0	0	0	0	0	0	0	0	0	0									639	0	0	0	0	0	0	0	0	0	0	0	0	0	0	0	0	0	0	0
	640	0	0	0	0	0	0	0	0	0	0	0	0	0	0	0	0	0	0	0	0									640	0	0	0	0	0	0	0	0	0	0	0	0	0	0	0	0	0	0	0
	641	0	0	0	0	0	0	0	0	0	0	0	0	0	0	0	0	0	0	0	0									641	0	0	0	0	0	0	0	0	0	0	0	0	0	0	0	0	0	0	0
	642	0	0	0	0	0	0	0	0	0	0	0	0	0	0	0	0	0	0	0	0									642	0	0	0	0	0	0	0	0	0	0	0	0	0	0	0	0	0	0	0
	643	0	0	0	0	0	0	0	0	0	0	0	0	0	0	0	0	0	0	0	0									643	0	0	0	0	0	0	0	0	0	0	0	0	0	0	0	0	0	0	0
	644	0	0	0	0	0	0	0	0	0	0	0	0	0	0	0	0	0	0	0	0									644	0	0	0	0	0	0	0	0	0	0	0	0	0	0	0	0	0	0	0
	645	0	0	0	0	0	0	0	0	0	0	0	0	0	0	0	0	0	0	0	0									645	0	0	0	0	0	0	0	0	0	0	0	0	0	0	0	0	0	0	0
	646	0	0	0	0	0	0	0	0	0	0	0	0	0	0	0	0	0	0	0	0									646	0	0	0	0	0	0	0	0	0	0	0	0	0	0	0	0	0	0	0
	647	0	0	0	0	0	0	0	0	0	0	0	0	0	0	0	0	0	0	0	0									647	0	0	0	0	0	0	0	0	0	0	0	0	0	0	0	0	0	0	0
	648	0	0	0	0	0	0	0	0	0	0	0	0	0	0	0	0	0	0	0	0									648	0	0	0	0	0	0	0	0	0	0	0	0	0	0	0	0	0	0	0
	649	0	0	0	0	0	0	0	0	0	0	0	0	0	0	0	0	0	0	0	0									649	0	0	0	0	0	0	0	0	0	0	0	0	0	0	0	0	0	0	0
	650	0	0	0	0	0	0	0	0	0	0	0	0	0	0	0	0	0	0	0	0									650	0	0	0	0	0	0	0	0	0	0	0	0	0	0	0	0	0	0	0
	651	0	0	0	0	0	0	0	0	0	0	0	0	0	0	0	0	0	0	0	0									651	0	0	0	0	0	0	0	0	0	0	0	0	0	0	0	0	0	0	0
	652	0	0	0	0	0	0	0	0	0	0	0	0	0	0	0	0	0	0	0	0									652	0	0	0	0	0	0	0	0	0	0	0	0	0	0	0	0	0	0	0
	653	0	0	0	0	0	0	0	0	0	0	0	0	0	0	0	0	0	0	0	0									653	0	0	0	0	0	0	0	0	0	0	0	0	0	0	0	0	0	0	0
	654	0	0	0	0	0	0	0	0	0	0	0	0	0	0	0	0	0	0	0	0									654	0	0	0	0	0	0	0	0	0	0	0	0	0	0	0	0	0	0	0
	655	0	0	0	0	0	0	0	0	0	0	0	0	0	0	0	0	0	0	0	0									655	0	0	0	0	0	0	0	0	0	0	0	0	0	0	0	0	0	0	0
	656	0	0	0	0	0	0	0	0	0	0	0	0	0	0	0	0	0	0	0	0									656	0	0	0	0	0	0	0	0	0	0	0	0	0	0	0	0	0	0	0
	657	0	0	0	0	0	0	0	0	0	0	0	0	0	0	0	0	0	0	0	0									657	0	0	0	0	0	0	0	0	0	0	0	0	0	0	0	0	0	0	0
	658	0	0	0	0	0	0	0	0	0	0	0	0	0	0	0	0	0	0	0	0									658	0	0	0	0	0	0	0	0	0	0	0	0	0	0	0	0	0	0	0
	659	0	0	0	0	0	0	0	0	0	0	0	0	0	0	0	0	0	0	0	0									659	0	0	0	0	0	0	0	0	0	0	0	0	0	0	0	0	0	0	0
	660	0	0	0	0	0	0	0	0	0	0	0	0	0	0	0	0	0	0	0	0									660	0	0	0	0	0	0	0	0	0	0	0	0	0	0	0	0	0	0	0
	661	0	0	0	0	0	0	0	0	0	0	0	0	0	0	0	0	0	0	0	0									661	0	0	0	0	0	0	0	0	0	0	0	0	0	0	0	0	0	0	0
	662	0	0	0	0	0	0	0	0	0	0	0	0	0	0	0	0	0	0	0	0									662	0	0	0	0	0	0	0	0	0	0	0	0	0	0	0	0	0	0	0
	663	0	0	0	0	0	0	0	0	0	0	0	0	0	0	0	0	0	0	0	0									663	0	0	0	0	0	0	0	0	0	0	0	0	0	0	0	0	0	0	0
	664	0	0	0	0	0	0	0	0	0	0	0	0	0	0	0	0	0	0	0	0									664	0	0	0	0	0	0	0	0	0	0	0	0	0	0	0	0	0	0	0
	665	0	0	0	0	0	0	0	0	0	0	0	0	0	0	0	0	0	0	0	0									665	0	0	0	0	0	0	0	0	0	0	0	0	0	0	0	0	0	0	0
	666	0	0	0	0	0	0	0	0	0	0	0	0	0	0	0	0	0	0	0	0									666	0	0	0	0	0	0	0	0	0	0	0	0	0	0	0	0	0	0	0
	667	0	0	0	0	0	0	0	0	0	0	0	0	0	0	0	0	0	0	0	0									667	0	0	0	0	0	0	0	0	0	0	0	0	0	0	0	0	0	0	0
	668	0	0	0	0	0	0	0	0	0	0	0	0	0	0	0	0	0	0	0	0									668	0	0	0	0	0	0	0	0	0	0	0	0	0	0	0	0	0	0	0
	669	0	0	0	0	0	0	0	0	0	0	0	0	0	0	0	0	0	0	0	0									669	0	0	0	0	0	0	0	0	0	0	0	0	0	0	0	0	0	0	0
	670	0	0	0	0	0	0	0	0	0	0	0	0	0	0	0	0	0	0	0	0									670	0	0	0	0	0	0	0	0	0	0	0	0	0	0	0	0	0	0	0
	671	0	0	0	0	0	0	0	0	0	0	0	0	0	0	0	0	0	0	0	0									671	0	0	0	0	0	0	0	0	0	0	0	0	0	0	0	0	0	0	0
	672	0	0	0	0	0	0	0	0	0	0	0	0	0	0	0	0	0	0	0	0									672	0	0	0	0	0	0	0	0	0	0	0	0	0	0	0	0	0	0	0
	673	0	0	0	0	0	0	0	0	0	0	0	0	0	0	0	0	0	0	0	0									673	0	0	0	0	0	0	0	0	0	0	0	0	0	0	0	0	0	0	0
	674	0	0	0	0	0	0	0	0	0	0	0	0	0	0	0	0	0	0	0	0									674	0	0	0	0	0	0	0	0	0	0	0	0	0	0	0	0	0	0	0
	675	0	0	0	0	0	0	0	0	0	0	0	0	0	0	0	0	0	0	0	0									675	0	0	0	0	0	0	0	0	0	0	0	0	0	0	0	0	0	0	0
	676	0	0	0	0	0	0	0	0	0	0	0	0	0	0	0	0	0	0	0	0									676	0	0	0	0	0	0	0	0	0	0	0	0	0	0	0	0	0	0	0
	677	0	0	0	0	0	0	0	0	0	0	0	0	0	0	0	0	0	0	0	0									677	0	0	0	0	0	0	0	0	0	0	0	0	0	0	0	0	0	0	0
	678	0	0	0	0	0	0	0	0	0	0	0	0	0	0	0	0	0	0	0	0									678	0	0	0	0	0	0	0	0	0	0	0	0	0	0	0	0	0	0	0
	679	0	0	0	0	0	0	0	0	0	0	0	0	0	0	0	0	0	0	0	0									679	0	0	0	0	0	0	0	0	0	0	0	0	0	0	0	0	0	0	0
	680	0	0	0	0	0	0	0	0	0	0	0	0	0	0	0	0	0	0	0	0									680	0	0	0	0	0	0	0	0	0	0	0	0	0	0	0	0	0	0	0
	681	0	0	0	0	0	0	0	0	0	0	0	0	0	0	0	0	0	0	0	0									681	0	0	0	0	0	0	0	0	0	0	0	0	0	0	0	0	0	0	0
	682	0	0	0	0	0	0	0	0	0	0	0	0	0	0	0	0	0	0	0	0									682	0	0	0	0	0	0	0	0	0	0	0	0	0	0	0	0	0	0	0
	683	0	0	0	0	0	0	0	0	0	0	0	0	0	0	0	0	0	0	0	0									683	0	0	0	0	0	0	0	0	0	0	0	0	0	0	0	0	0	0	0
	684	0	0	0	0	0	0	0	0	0	0	0	0	0	0	0	0	0	0	0	0									684	0	0	0	0	0	0	0	0	0	0	0	0	0	0	0	0	0	0	0
	685	0	0	0	0	0	0	0	0	0	0	0	0	0	0	0	0	0	0	0	0									685	0	0	0	0	0	0	0	0	0	0	0	0	0	0	0	0	0	0	0
	686	0	0	0	0	0	0	0	0	0	0	0	0	0	0	0	0	0	0	0	0									686	0	0	0	0	0	0	0	0	0	0	0	0	0	0	0	0	0	0	0
	687	0	0	0	0	0	0	0	0	0	0	0	0	0	0	0	0	0	0	0	0									687	0	0	0	0	0	0	0	0	0	0	0	0	0	0	0	0	0	0	0
	688	0	0	0	0	0	0	0	0	0	0	0	0	0	0	0	0	0	0	0	0									688	0	0	0	0	0	0	0	0	0	0	0	0	0	0	0	0	0	0	0
	689	0	0	0	0	0	0	0	0	0	0	0	0	0	0	0	0	0	0	0	0									689	0	0	0	0	0	0	0	0	0	0	0	0	0	0	0	0	0	0	0
	690	0	0	0	0	0	0	0	0	0	0	0	0	0	0	0	0	0	0	0	0									690	0	0	0	0	0	0	0	0	0	0	0	0	0	0	0	0	0	0	0
	691	0	0	0	0	0	0	0	0	0	0	0	0	0	0	0	0	0	0	0	0									691	0	0	0	0	0	0	0	0	0	0	0	0	0	0	0	0	0	0	0
	692	0	0	0	0	0	0	0	0	0	0	0	0	0	0	0	0	0	0	0	0									692	0	0	0	0	0	0	0	0	0	0	0	0	0	0	0	0	0	0	0
	693	0	0	0	0	0	0	0	0	0	0	0	0	0	0	0	0	0	0	0	0									693	0	0	0	0	0	0	0	0	0	0	0	0	0	0	0	0	0	0	0
	694	0	0	0	0	0	0	0	0	0	0	0	0	0	0	0	0	0	0	0	0									694	0	0	0	0	0	0	0	0	0	0	0	0	0	0	0	0	0	0	0
	695	0	0	0	0	0	0	0	0	0	0	0	0	0	0	0	0	0	0	0	0									695	0	0	0	0	0	0	0	0	0	0	0	0	0	0	0	0	0	0	0
	696	0	0	0	0	0	0	0	0	0	0	0	0	0	0	0	0	0	0	0	0									696	0	0	0	0	0	0	0	0	0	0	0	0	0	0	0	0	0	0	0
	697	0	0	0	0	0	0	0	0	0	0	0	0	0	0	0	0	0	0	0	0									697	0	0	0	0	0	0	0	0	0	0	0	0	0	0	0	0	0	0	0
	698	0	0	0	0	0	0	0	0	0	0	0	0	0	0	0	0	0	0	0	0									698	0	0	0	0	0	0	0	0	0	0	0	0	0	0	0	0	0	0	0
	699	0	0	0	0	0	0	0	0	0	0	0	0	0	0	0	0	0	0	0	0									699	0	0	0	0	0	0	0	0	0	0	0	0	0	0	0	0	0	0	0
	700	0	0	0	0	0	0	0	0	0	0	0	0	0	0	0	0	0	0	0	0									700	0	0	0	0	0	0	0	0	0	0	0	0	0	0	0	0	0	0	0
	701	0	0	0	0	0	0	0	0	0	0	0	0	0	0	0	0	0	0	0	0									701	0	0	0	0	0	0	0	0	0	0	0	0	0	0	0	0	0	0	0
	702	0	0	0	0	0	0	0	0	0	0	0	0	0	0	0	0	0	0	0	0									702	0	0	0	0	0	0	0	0	0	0	0	0	0	0	0	0	0	0	0
	703	0	0	0	0	0	0	0	0	0	0	0	0	0	0	0	0	0	0	0	0									703	0	0	0	0	0	0	0	0	0	0	0	0	0	0	0	0	0	0	0
	704	0	0	0	0	0	0	0	0	0	0	0	0	0	0	0	0	0	0	0	0									704	0	0	0	0	0	0	0	0	0	0	0	0	0	0	0	0	0	0	0
	705	0	0	0	0	0	0	0	0	0	0	0	0	0	0	0	0	0	0	0	0									705	0	0	0	0	0	0	0	0	0	0	0	0	0	0	0	0	0	0	0
	706	0	0	0	0	0	0	0	0	0	0	0	0	0	0	0	0	0	0	0	0									706	0	0	0	0	0	0	0	0	0	0	0	0	0	0	0	0	0	0	0
	707	0	0	0	0	0	0	0	0	0	0	0	0	0	0	0	0	0	0	0	0									707	0	0	0	0	0	0	0	0	0	0	0	0	0	0	0	0	0	0	0
	708	0	0	0	0	0	0	0	0	0	0	0	0	0	0	0	0	0	0	0	0									708	0	0	0	0	0	0	0	0	0	0	0	0	0	0	0	0	0	0	0
	709	0	0	0	0	0	0	0	0	0	0	0	0	0	0	0	0	0	0	0	0									709	0	0	0	0	0	0	0	0	0	0	0	0	0	0	0	0	0	0	0
	710	0	0	0	0	0	0	0	0	0	0	0	0	0	0	0	0	0	0	0	0									710	0	0	0	0	0	0	0	0	0	0	0	0	0	0	0	0	0	0	0
	711	0	0	0	0	0	0	0	0	0	0	0	0	0	0	0	0	0	0	0	0									711	0	0	0	0	0	0	0	0	0	0	0	0	0	0	0	0	0	0	0
	712	0	0	0	0	0	0	0	0	0	0	0	0	0	0	0	0	0	0	0	0									712	0	0	0	0	0	0	0	0	0	0	0	0	0	0	0	0	0	0	0
	713	0	0	0	0	0	0	0	0	0	0	0	0	0	0	0	0	0	0	0	0									713	0	0	0	0	0	0	0	0	0	0	0	0	0	0	0	0	0	0	0
	714	0	0	0	0	0	0	0	0	0	0	0	0	0	0	0	0	0	0	0	0									714	0	0	0	0	0	0	0	0	0	0	0	0	0	0	0	0	0	0	0
	715	0	0	0	0	0	0	0	0	0	0	0	0	0	0	0	0	0	0	0	0									715	0	0	0	0	0	0	0	0	0	0	0	0	0	0	0	0	0	0	0
	716	0	0	0	0	0	0	0	0	0	0	0	0	0	0	0	0	0	0	0	0									716	0	0	0	0	0	0	0	0	0	0	0	0	0	0	0	0	0	0	0
	717	0	0	0	0	0	0	0	0	0	0	0	0	0	0	0	0	0	0	0	0									717	0	0	0	0	0	0	0	0	0	0	0	0	0	0	0	0	0	0	0
	718	0	0	0	0	0	0	0	0	0	0	0	0	0	0	0	0	0	0	0	0									718	0	0	0	0	0	0	0	0	0	0	0	0	0	0	0	0	0	0	0
	719	0	0	0	0	0	0	0	0	0	0	0	0	0	0	0	0	0	0	0	0									719	0	0	0	0	0	0	0	0	0	0	0	0	0	0	0	0	0	0	0
	720	0	0	0	0	0	0	0	0	0	0	0	0	0	0	0	0	0	0	0	0									720	0	0	0	0	0	0	0	0	0	0	0	0	0	0	0	0	0	0	0
	721	0	0	0	0	0	0	0	0	0	0	0	0	0	0	0	0	0	0	0	0									721	0	0	0	0	0	0	0	0	0	0	0	0	0	0	0	0	0	0	0
	722	0	0	0	0	0	0	0	0	0	0	0	0	0	0	0	0	0	0	0	0									722	0	0	0	0	0	0	0	0	0	0	0	0	0	0	0	0	0	0	0
	723	0	0	0	0	0	0	0	0	0	0	0	0	0	0	0	0	0	0	0	0									723	0	0	0	0	0	0	0	0	0	0	0	0	0	0	0	0	0	0	0
	724	0	0	0	0	0	0	0	0	0	0	0	0	0	0	0	0	0	0	0	0									724	0	0	0	0	0	0	0	0	0	0	0	0	0	0	0	0	0	0	0
	725	0	0	0	0	0	0	0	0	0	0	0	0	0	0	0	0	0	0	0	0									725	0	0	0	0	0	0	0	0	0	0	0	0	0	0	0	0	0	0	0
	726	0	0	0	0	0	0	0	0	0	0	0	0	0	0	0	0	0	0	0	0									726	0	0	0	0	0	0	0	0	0	0	0	0	0	0	0	0	0	0	0
	727	0	0	0	0	0	0	0	0	0	0	0	0	0	0	0	0	0	0	0	0									727	0	0	0	0	0	0	0	0	0	0	0	0	0	0	0	0	0	0	0
	728	0	0	0	0	0	0	0	0	0	0	0	0	0	0	0	0	0	0	0	0									728	0	0	0	0	0	0	0	0	0	0	0	0	0	0	0	0	0	0	0
	729	0	0	0	0	0	0	0	0	0	0	0	0	0	0	0	0	0	0	0	0									729	0	0	0	0	0	0	0	0	0	0	0	0	0	0	0	0	0	0	0
	730	0	0	0	0	0	0	0	0	0	0	0	0	0	0	0	0	0	0	0	0									730	0	0	0	0	0	0	0	0	0	0	0	0	0	0	0	0	0	0	0
	731	0	0	0	0	0	0	0	0	0	0	0	0	0	0	0	0	0	0	0	0									731	0	0	0	0	0	0	0	0	0	0	0	0	0	0	0	0	0	0	0
	732	0	0	0	0	0	0	0	0	0	0	0	0	0	0	0	0	0	0	0	0									732	0	0	0	0	0	0	0	0	0	0	0	0	0	0	0	0	0	0	0
	733	0	0	0	0	0	0	0	0	0	0	0	0	0	0	0	0	0	0	0	0									733	0	0	0	0	0	0	0	0	0	0	0	0	0	0	0	0	0	0	0
	734	0	0	0	0	0	0	0	0	0	0	0	0	0	0	0	0	0	0	0	0									734	0	0	0	0	0	0	0	0	0	0	0	0	0	0	0	0	0	0	0
	735	0	0	0	0	0	0	0	0	0	0	0	0	0	0	0	0	0	0	0	0									735	0	0	0	0	0	0	0	0	0	0	0	0	0	0	0	0	0	0	0
	736	0	0	0	0	0	0	0	0	0	0	0	0	0	0	0	0	0	0	0	0									736	0	0	0	0	0	0	0	0	0	0	0	0	0	0	0	0	0	0	0
	737	0	0	0	0	0	0	0	0	0	0	0	0	0	0	0	0	0	0	0	0									737	0	0	0	0	0	0	0	0	0	0	0	0	0	0	0	0	0	0	0
	738	0	0	0	0	0	0	0	0	0	0	0	0	0	0	0	0	0	0	0	0									738	0	0	0	0	0	0	0	0	0	0	0	0	0	0	0	0	0	0	0
	739	0	0	0	0	0	0	0	0	0	0	0	0	0	0	0	0	0	0	0	0									739	0	0	0	0	0	0	0	0	0	0	0	0	0	0	0	0	0	0	0
	740	0	0	0	0	0	0	0	0	0	0	0	0	0	0	0	0	0	0	0	0									740	0	0	0	0	0	0	0	0	0	0	0	0	0	0	0	0	0	0	0
	741	0	0	0	0	0	0	0	0	0	0	0	0	0	0	0	0	0	0	0	0									741	0	0	0	0	0	0	0	0	0	0	0	0	0	0	0	0	0	0	0
	742	0	0	0	0	0	0	0	0	0	0	0	0	0	0	0	0	0	0	0	0									742	0	0	0	0	0	0	0	0	0	0	0	0	0	0	0	0	0	0	0
	743	0	0	0	0	0	0	0	0	0	0	0	0	0	0	0	0	0	0	0	0									743	0	0	0	0	0	0	0	0	0	0	0	0	0	0	0	0	0	0	0
	744	0	0	0	0	0	0	0	0	0	0	0	0	0	0	0	0	0	0	0	0									744	0	0	0	0	0	0	0	0	0	0	0	0	0	0	0	0	0	0	0
	745	0	0	0	0	0	0	0	0	0	0	0	0	0	0	0	0	0	0	0	0									745	0	0	0	0	0	0	0	0	0	0	0	0	0	0	0	0	0	0	0
	746	0	0	0	0	0	0	0	0	0	0	0	0	0	0	0	0	0	0	0	0									746	0	0	0	0	0	0	0	0	0	0	0	0	0	0	0	0	0	0	0
	747	0	0	0	0	0	0	0	0	0	0	0	0	0	0	0	0	0	0	0	0									747	0	0	0	0	0	0	0	0	0	0	0	0	0	0	0	0	0	0	0
	748	0	0	0	0	0	0	0	0	0	0	0	0	0	0	0	0	0	0	0	0									748	0	0	0	0	0	0	0	0	0	0	0	0	0	0	0	0	0	0	0
	749	0	0	0	0	0	0	0	0	0	0	0	0	0	0	0	0	0	0	0	0									749	0	0	0	0	0	0	0	0	0	0	0	0	0	0	0	0	0	0	0
	750	0	0	0	0	0	0	0	0	0	0	0	0	0	0	0	0	0	0	0	0									750	0	0	0	0	0	0	0	0	0	0	0	0	0	0	0	0	0	0	0
	751	0	0	0	0	0	0	0	0	0	0	0	0	0	0	0	0	0	0	0	0									751	0	0	0	0	0	0	0	0	0	0	0	0	0	0	0	0	0	0	0
	752	0	0	0	0	0	0	0	0	0	0	0	0	0	0	0	0	0	0	0	0									752	0	0	0	0	0	0	0	0	0	0	0	0	0	0	0	0	0	0	0
	753	0	0	0	0	0	0	0	0	0	0	0	0	0	0	0	0	0	0	0	0									753	0	0	0	0	0	0	0	0	0	0	0	0	0	0	0	0	0	0	0
	754	0	0	0	0	0	0	0	0	0	0	0	0	0	0	0	0	0	0	0	0									754	0	0	0	0	0	0	0	0	0	0	0	0	0	0	0	0	0	0	0
	755	0	0	0	0	0	0	0	0	0	0	0	0	0	0	0	0	0	0	0	0									755	0	0	0	0	0	0	0	0	0	0	0	0	0	0	0	0	0	0	0
	756	0	0	0	0	0	0	0	0	0	0	0	0	0	0	0	0	0	0	0	0									756	0	0	0	0	0	0	0	0	0	0	0	0	0	0	0	0	0	0	0
	757	0	0	0	0	0	0	0	0	0	0	0	0	0	0	0	0	0	0	0	0									757	0	0	0	0	0	0	0	0	0	0	0	0	0	0	0	0	0	0	0
	758	0	0	0	0	0	0	0	0	0	0	0	0	0	0	0	0	0	0	0	0									758	0	0	0	0	0	0	0	0	0	0	0	0	0	0	0	0	0	0	0
	759	0	0	0	0	0	0	0	0	0	0	0	0	0	0	0	0	0	0	0	0									759	0	0	0	0	0	0	0	0	0	0	0	0	0	0	0	0	0	0	0
	760	0	0	0	0	0	0	0	0	0	0	0	0	0	0	0	0	0	0	0	0									760	0	0	0	0	0	0	0	0	0	0	0	0	0	0	0	0	0	0	0
	761	0	0	0	0	0	0	0	0	0	0	0	0	0	0	0	0	0	0	0	0									761	0	0	0	0	0	0	0	0	0	0	0	0	0	0	0	0	0	0	0
	762	0	0	0	0	0	0	0	0	0	0	0	0	0	0	0	0	0	0	0	0									762	0	0	0	0	0	0	0	0	0	0	0	0	0	0	0	0	0	0	0
	763	0	0	0	0	0	0	0	0	0	0	0	0	0	0	0	0	0	0	0	0									763	0	0	0	0	0	0	0	0	0	0	0	0	0	0	0	0	0	0	0
	764	0	0	0	0	0	0	0	0	0	0	0	0	0	0	0	0	0	0	0	0									764	0	0	0	0	0	0	0	0	0	0	0	0	0	0	0	0	0	0	0
	765	0	0	0	0	0	0	0	0	0	0	0	0	0	0	0	0	0	0	0	0									765	0	0	0	0	0	0	0	0	0	0	0	0	0	0	0	0	0	0	0
	766	0	0	0	0	0	0	0	0	0	0	0	0	0	0	0	0	0	0	0	0									766	0	0	0	0	0	0	0	0	0	0	0	0	0	0	0	0	0	0	0
	767	0	0	0	0	0	0	0	0	0	0	0	0	0	0	0	0	0	0	0	0									767	0	0	0	0	0	0	0	0	0	0	0	0	0	0	0	0	0	0	0
	768	0	0	0	0	0	0	0	0	0	0	0	0	0	0	0	0	0	0	0	0									768	0	0	0	0	0	0	0	0	0	0	0	0	0	0	0	0	0	0	0
	769	0	0	0	0	0	0	0	0	0	0	0	0	0	0	0	0	0	0	0	0									769	0	0	0	0	0	0	0	0	0	0	0	0	0	0	0	0	0	0	0
	770	0	0	0	0	0	0	0	0	0	0	0	0	0	0	0	0	0	0	0	0									770	0	0	0	0	0	0	0	0	0	0	0	0	0	0	0	0	0	0	0
	771	0	0	0	0	0	0	0	0	0	0	0	0	0	0	0	0	0	0	0	0									771	0	0	0	0	0	0	0	0	0	0	0	0	0	0	0	0	0	0	0
	772	0	0	0	0	0	0	0	0	0	0	0	0	0	0	0	0	0	0	0	0									772	0	0	0	0	0	0	0	0	0	0	0	0	0	0	0	0	0	0	0
	773	0	0	0	0	0	0	0	0	0	0	0	0	0	0	0	0	0	0	0	0									773	0	0	0	0	0	0	0	0	0	0	0	0	0	0	0	0	0	0	0
	774	0	0	0	0	0	0	0	0	0	0	0	0	0	0	0	0	0	0	0	0									774	0	0	0	0	0	0	0	0	0	0	0	0	0	0	0	0	0	0	0
	775	0	0	0	0	0	0	0	0	0	0	0	0	0	0	0	0	0	0	0	0									775	0	0	0	0	0	0	0	0	0	0	0	0	0	0	0	0	0	0	0
	776	0	0	0	0	0	0	0	0	0	0	0	0	0	0	0	0	0	0	0	0									776	0	0	0	0	0	0	0	0	0	0	0	0	0	0	0	0	0	0	0
	777	0	0	0	0	0	0	0	0	0	0	0	0	0	0	0	0	0	0	0	0									777	0	0	0	0	0	0	0	0	0	0	0	0	0	0	0	0	0	0	0
	778	0	0	0	0	0	0	0	0	0	0	0	0	0	0	0	0	0	0	0	0									778	0	0	0	0	0	0	0	0	0	0	0	0	0	0	0	0	0	0	0
	779	0	0	0	0	0	0	0	0	0	0	0	0	0	0	0	0	0	0	0	0									779	0	0	0	0	0	0	0	0	0	0	0	0	0	0	0	0	0	0	0
	780	0	0	0	0	0	0	0	0	0	0	0	0	0	0	0	0	0	0	0	0									780	0	0	0	0	0	0	0	0	0	0	0	0	0	0	0	0	0	0	0
	781	0	0	0	0	0	0	0	0	0	0	0	0	0	0	0	0	0	0	0	0									781	0	0	0	0	0	0	0	0	0	0	0	0	0	0	0	0	0	0	0
	782	0	0	0	0	0	0	0	0	0	0	0	0	0	0	0	0	0	0	0	0									782	0	0	0	0	0	0	0	0	0	0	0	0	0	0	0	0	0	0	0
	783	0	0	0	0	0	0	0	0	0	0	0	0	0	0	0	0	0	0	0	0									783	0	0	0	0	0	0	0	0	0	0	0	0	0	0	0	0	0	0	0
	784	0	0	0	0	0	0	0	0	0	0	0	0	0	0	0	0	0	0	0	0									784	0	0	0	0	0	0	0	0	0	0	0	0	0	0	0	0	0	0	0
	785	0	0	0	0	0	0	0	0	0	0	0	0	0	0	0	0	0	0	0	0									785	0	0	0	0	0	0	0	0	0	0	0	0	0	0	0	0	0	0	0
	786	0	0	0	0	0	0	0	0	0	0	0	0	0	0	0	0	0	0	0	0									786	0	0	0	0	0	0	0	0	0	0	0	0	0	0	0	0	0	0	0
	787	0	0	0	0	0	0	0	0	0	0	0	0	0	0	0	0	0	0	0	0									787	0	0	0	0	0	0	0	0	0	0	0	0	0	0	0	0	0	0	0
	788	0	0	0	0	0	0	0	0	0	0	0	0	0	0	0	0	0	0	0	0									788	0	0	0	0	0	0	0	0	0	0	0	0	0	0	0	0	0	0	0
	789	0	0	0	0	0	0	0	0	0	0	0	0	0	0	0	0	0	0	0	0									789	0	0	0	0	0	0	0	0	0	0	0	0	0	0	0	0	0	0	0
	790	0	0	0	0	0	0	0	0	0	0	0	0	0	0	0	0	0	0	0	0									790	0	0	0	0	0	0	0	0	0	0	0	0	0	0	0	0	0	0	0
	791	0	0	0	0	0	0	0	0	0	0	0	0	0	0	0	0	0	0	0	0									791	0	0	0	0	0	0	0	0	0	0	0	0	0	0	0	0	0	0	0
	792	0	0	0	0	0	0	0	0	0	0	0	0	0	0	0	0	0	0	0	0									792	0	0	0	0	0	0	0	0	0	0	0	0	0	0	0	0	0	0	0
	793	0	0	0	0	0	0	0	0	0	0	0	0	0	0	0	0	0	0	0	0									793	0	0	0	0	0	0	0	0	0	0	0	0	0	0	0	0	0	0	0
	794	0	0	0	0	0	0	0	0	0	0	0	0	0	0	0	0	0	0	0	0									794	0	0	0	0	0	0	0	0	0	0	0	0	0	0	0	0	0	0	0
	795	0	0	0	0	0	0	0	0	0	0	0	0	0	0	0	0	0	0	0	0									795	0	0	0	0	0	0	0	0	0	0	0	0	0	0	0	0	0	0	0
	796	0	0	0	0	0	0	0	0	0	0	0	0	0	0	0	0	0	0	0	0									796	0	0	0	0	0	0	0	0	0	0	0	0	0	0	0	0	0	0	0
	797	0	0	0	0	0	0	0	0	0	0	0	0	0	0	0	0	0	0	0	0									797	0	0	0	0	0	0	0	0	0	0	0	0	0	0	0	0	0	0	0
	798	0	0	0	0	0	0	0	0	0	0	0	0	0	0	0	0	0	0	0	0									798	0	0	0	0	0	0	0	0	0	0	0	0	0	0	0	0	0	0	0
	799	0	0	0	0	0	0	0	0	0	0	0	0	0	0	0	0	0	0	0	0									799	0	0	0	0	0	0	0	0	0	0	0	0	0	0	0	0	0	0	0
	800	0	0	0	0	0	0	0	0	0	0	0	0	0	0	0	0	0	0	0	0									800	0	0	0	0	0	0	0	0	0	0	0	0	0	0	0	0	0	0	0
	801	0	0	0	0	0	0	0	0	0	0	0	0	0	0	0	0	0	0	0	0									801	0	0	0	0	0	0	0	0	0	0	0	0	0	0	0	0	0	0	0
	802	0	0	0	0	0	0	0	0	0	0	0	0	0	0	0	0	0	0	0	0									802	0	0	0	0	0	0	0	0	0	0	0	0	0	0	0	0	0	0	0
	803	0	0	0	0	0	0	0	0	0	0	0	0	0	0	0	0	0	0	0	0									803	0	0	0	0	0	0	0	0	0	0	0	0	0	0	0	0	0	0	0
	804	0	0	0	0	0	0	0	0	0	0	0	0	0	0	0	0	0	0	0	0									804	0	0	0	0	0	0	0	0	0	0	0	0	0	0	0	0	0	0	0
	805	0	0	0	0	0	0	0	0	0	0	0	0	0	0	0	0	0	0	0	0									805	0	0	0	0	0	0	0	0	0	0	0	0	0	0	0	0	0	0	0
	806	0	0	0	0	0	0	0	0	0	0	0	0	0	0	0	0	0	0	0	0									806	0	0	0	0	0	0	0	0	0	0	0	0	0	0	0	0	0	0	0
	807	0	0	0	0	0	0	0	0	0	0	0	0	0	0	0	0	0	0	0	0									807	0	0	0	0	0	0	0	0	0	0	0	0	0	0	0	0	0	0	0
	808	0	0	0	0	0	0	0	0	0	0	0	0	0	0	0	0	0	0	0	0									808	0	0	0	0	0	0	0	0	0	0	0	0	0	0	0	0	0	0	0
	809	0	0	0	0	0	0	0	0	0	0	0	0	0	0	0	0	0	0	0	0									809	0	0	0	0	0	0	0	0	0	0	0	0	0	0	0	0	0	0	0
	810	0	0	0	0	0	0	0	0	0	0	0	0	0	0	0	0	0	0	0	0									810	0	0	0	0	0	0	0	0	0	0	0	0	0	0	0	0	0	0	0
	811	0	0	0	0	0	0	0	0	0	0	0	0	0	0	0	0	0	0	0	0									811	0	0	0	0	0	0	0	0	0	0	0	0	0	0	0	0	0	0	0
	812	0	0	0	0	0	0	0	0	0	0	0	0	0	0	0	0	0	0	0	0									812	0	0	0	0	0	0	0	0	0	0	0	0	0	0	0	0	0	0	0
	813	0	0	0	0	0	0	0	0	0	0	0	0	0	0	0	0	0	0	0	0									813	0	0	0	0	0	0	0	0	0	0	0	0	0	0	0	0	0	0	0
	814	0	0	0	0	0	0	0	0	0	0	0	0	0	0	0	0	0	0	0	0									814	0	0	0	0	0	0	0	0	0	0	0	0	0	0	0	0	0	0	0
	815	0	0	0	0	0	0	0	0	0	0	0	0	0	0	0	0	0	0	0	0									815	0	0	0	0	0	0	0	0	0	0	0	0	0	0	0	0	0	0	0
	816	0	0	0	0	0	0	0	0	0	0	0	0	0	0	0	0	0	0	0	0									816	0	0	0	0	0	0	0	0	0	0	0	0	0	0	0	0	0	0	0
	817	0	0	0	0	0	0	0	0	0	0	0	0	0	0	0	0	0	0	0	0									817	0	0	0	0	0	0	0	0	0	0	0	0	0	0	0	0	0	0	0
	818	0	0	0	0	0	0	0	0	0	0	0	0	0	0	0	0	0	0	0	0									818	0	0	0	0	0	0	0	0	0	0	0	0	0	0	0	0	0	0	0
	819	0	0	0	0	0	0	0	0	0	0	0	0	0	0	0	0	0	0	0	0									819	0	0	0	0	0	0	0	0	0	0	0	0	0	0	0	0	0	0	0
	820	0	0	0	0	0	0	0	0	0	0	0	0	0	0	0	0	0	0	0	0									820	0	0	0	0	0	0	0	0	0	0	0	0	0	0	0	0	0	0	0
	821	0	0	0	0	0	0	0	0	0	0	0	0	0	0	0	0	0	0	0	0									821	0	0	0	0	0	0	0	0	0	0	0	0	0	0	0	0	0	0	0
	822	0	0	0	0	0	0	0	0	0	0	0	0	0	0	0	0	0	0	0	0									822	0	0	0	0	0	0	0	0	0	0	0	0	0	0	0	0	0	0	0
	823	0	0	0	0	0	0	0	0	0	0	0	0	0	0	0	0	0	0	0	0									823	0	0	0	0	0	0	0	0	0	0	0	0	0	0	0	0	0	0	0
	824	0	0	0	0	0	0	0	0	0	0	0	0	0	0	0	0	0	0	0	0									824	0	0	0	0	0	0	0	0	0	0	0	0	0	0	0	0	0	0	0
	825	0	0	0	0	0	0	0	0	0	0	0	0	0	0	0	0	0	0	0	0									825	0	0	0	0	0	0	0	0	0	0	0	0	0	0	0	0	0	0	0
	826	0	0	0	0	0	0	0	0	0	0	0	0	0	0	0	0	0	0	0	0									826	0	0	0	0	0	0	0	0	0	0	0	0	0	0	0	0	0	0	0
	827	0	0	0	0	0	0	0	0	0	0	0	0	0	0	0	0	0	0	0	0									827	0	0	0	0	0	0	0	0	0	0	0	0	0	0	0	0	0	0	0
	828	0	0	0	0	0	0	0	0	0	0	0	0	0	0	0	0	0	0	0	0									828	0	0	0	0	0	0	0	0	0	0	0	0	0	0	0	0	0	0	0
	829	0	0	0	0	0	0	0	0	0	0	0	0	0	0	0	0	0	0	0	0									829	0	0	0	0	0	0	0	0	0	0	0	0	0	0	0	0	0	0	0
	830	0	0	0	0	0	0	0	0	0	0	0	0	0	0	0	0	0	0	0	0									830	0	0	0	0	0	0	0	0	0	0	0	0	0	0	0	0	0	0	0
	831	0	0	0	0	0	0	0	0	0	0	0	0	0	0	0	0	0	0	0	0									831	0	0	0	0	0	0	0	0	0	0	0	0	0	0	0	0	0	0	0
	832	0	0	0	0	0	0	0	0	0	0	0	0	0	0	0	0	0	0	0	0									832	0	0	0	0	0	0	0	0	0	0	0	0	0	0	0	0	0	0	0
	833	0	0	0	0	0	0	0	0	0	0	0	0	0	0	0	0	0	0	0	0									833	0	0	0	0	0	0	0	0	0	0	0	0	0	0	0	0	0	0	0
	834	0	0	0	0	0	0	0	0	0	0	0	0	0	0	0	0	0	0	0	0									834	0	0	0	0	0	0	0	0	0	0	0	0	0	0	0	0	0	0	0
	835	0	0	0	0	0	0	0	0	0	0	0	0	0	0	0	0	0	0	0	0									835	0	0	0	0	0	0	0	0	0	0	0	0	0	0	0	0	0	0	0
	836	0	0	0	0	0	0	0	0	0	0	0	0	0	0	0	0	0	0	0	0									836	0	0	0	0	0	0	0	0	0	0	0	0	0	0	0	0	0	0	0
	837	0	0	0	0	0	0	0	0	0	0	0	0	0	0	0	0	0	0	0	0									837	0	0	0	0	0	0	0	0	0	0	0	0	0	0	0	0	0	0	0
	838	0	0	0	0	0	0	0	0	0	0	0	0	0	0	0	0	0	0	0	0									838	0	0	0	0	0	0	0	0	0	0	0	0	0	0	0	0	0	0	0
	839	0	0	0	0	0	0	0	0	0	0	0	0	0	0	0	0	0	0	0	0									839	0	0	0	0	0	0	0	0	0	0	0	0	0	0	0	0	0	0	0
	840	0	0	0	0	0	0	0	0	0	0	0	0	0	0	0	0	0	0	0	0									840	0	0	0	0	0	0	0	0	0	0	0	0	0	0	0	0	0	0	0
	841	0	0	0	0	0	0	0	0	0	0	0	0	0	0	0	0	0	0	0	0									841	0	0	0	0	0	0	0	0	0	0	0	0	0	0	0	0	0	0	0
	842	0	0	0	0	0	0	0	0	0	0	0	0	0	0	0	0	0	0	0	0									842	0	0	0	0	0	0	0	0	0	0	0	0	0	0	0	0	0	0	0
	843	0	0	0	0	0	0	0	0	0	0	0	0	0	0	0	0	0	0	0	0									843	0	0	0	0	0	0	0	0	0	0	0	0	0	0	0	0	0	0	0
	844	0	0	0	0	0	0	0	0	0	0	0	0	0	0	0	0	0	0	0	0									844	0	0	0	0	0	0	0	0	0	0	0	0	0	0	0	0	0	0	0
	845	0	0	0	0	0	0	0	0	0	0	0	0	0	0	0	0	0	0	0	0									845	0	0	0	0	0	0	0	0	0	0	0	0	0	0	0	0	0	0	0
	846	0	0	0	0	0	0	0	0	0	0	0	0	0	0	0	0	0	0	0	0									846	0	0	0	0	0	0	0	0	0	0	0	0	0	0	0	0	0	0	0
	847	0	0	0	0	0	0	0	0	0	0	0	0	0	0	0	0	0	0	0	0									847	0	0	0	0	0	0	0	0	0	0	0	0	0	0	0	0	0	0	0
	848	0	0	0	0	0	0	0	0	0	0	0	0	0	0	0	0	0	0	0	0									848	0	0	0	0	0	0	0	0	0	0	0	0	0	0	0	0	0	0	0
	849	0	0	0	0	0	0	0	0	0	0	0	0	0	0	0	0	0	0	0	0									849	0	0	0	0	0	0	0	0	0	0	0	0	0	0	0	0	0	0	0
	850	0	0	0	0	0	0	0	0	0	0	0	0	0	0	0	0	0	0	0	0									850	0	0	0	0	0	0	0	0	0	0	0	0	0	0	0	0	0	0	0
	851	0	0	0	0	0	0	0	0	0	0	0	0	0	0	0	0	0	0	0	0									851	0	0	0	0	0	0	0	0	0	0	0	0	0	0	0	0	0	0	0
	852	0	0	0	0	0	0	0	0	0	0	0	0	0	0	0	0	0	0	0	0									852	0	0	0	0	0	0	0	0	0	0	0	0	0	0	0	0	0	0	0
	853	0	0	0	0	0	0	0	0	0	0	0	0	0	0	0	0	0	0	0	0									853	0	0	0	0	0	0	0	0	0	0	0	0	0	0	0	0	0	0	0
	854	0	0	0	0	0	0	0	0	0	0	0	0	0	0	0	0	0	0	0	0									854	0	0	0	0	0	0	0	0	0	0	0	0	0	0	0	0	0	0	0
	855	0	0	0	0	0	0	0	0	0	0	0	0	0	0	0	0	0	0	0	0									855	0	0	0	0	0	0	0	0	0	0	0	0	0	0	0	0	0	0	0
	856	0	0	0	0	0	0	0	0	0	0	0	0	0	0	0	0	0	0	0	0									856	0	0	0	0	0	0	0	0	0	0	0	0	0	0	0	0	0	0	0
	857	0	0	0	0	0	0	0	0	0	0	0	0	0	0	0	0	0	0	0	0									857	0	0	0	0	0	0	0	0	0	0	0	0	0	0	0	0	0	0	0
	858	0	0	0	0	0	0	0	0	0	0	0	0	0	0	0	0	0	0	0	0									858	0	0	0	0	0	0	0	0	0	0	0	0	0	0	0	0	0	0	0
	859	0	0	0	0	0	0	0	0	0	0	0	0	0	0	0	0	0	0	0	0									859	0	0	0	0	0	0	0	0	0	0	0	0	0	0	0	0	0	0	0
	860	0	0	0	0	0	0	0	0	0	0	0	0	0	0	0	0	0	0	0	0									860	0	0	0	0	0	0	0	0	0	0	0	0	0	0	0	0	0	0	0
	861	0	0	0	0	0	0	0	0	0	0	0	0	0	0	0	0	0	0	0	0									861	0	0	0	0	0	0	0	0	0	0	0	0	0	0	0	0	0	0	0
	862	0	0	0	0	0	0	0	0	0	0	0	0	0	0	0	0	0	0	0	0									862	0	0	0	0	0	0	0	0	0	0	0	0	0	0	0	0	0	0	0
	863	0	0	0	0	0	0	0	0	0	0	0	0	0	0	0	0	0	0	0	0									863	0	0	0	0	0	0	0	0	0	0	0	0	0	0	0	0	0	0	0
	864	0	0	0	0	0	0	0	0	0	0	0	0	0	0	0	0	0	0	0	0									864	0	0	0	0	0	0	0	0	0	0	0	0	0	0	0	0	0	0	0
	865	0	0	0	0	0	0	0	0	0	0	0	0	0	0	0	0	0	0	0	0									865	0	0	0	0	0	0	0	0	0	0	0	0	0	0	0	0	0	0	0
	866	0	0	0	0	0	0	0	0	0	0	0	0	0	0	0	0	0	0	0	0									866	0	0	0	0	0	0	0	0	0	0	0	0	0	0	0	0	0	0	0
	867	0	0	0	0	0	0	0	0	0	0	0	0	0	0	0	0	0	0	0	0									867	0	0	0	0	0	0	0	0	0	0	0	0	0	0	0	0	0	0	0
	868	0	0	0	0	0	0	0	0	0	0	0	0	0	0	0	0	0	0	0	0									868	0	0	0	0	0	0	0	0	0	0	0	0	0	0	0	0	0	0	0
	869	0	0	0	0	0	0	0	0	0	0	0	0	0	0	0	0	0	0	0	0									869	0	0	0	0	0	0	0	0	0	0	0	0	0	0	0	0	0	0	0
	870	0	0	0	0	0	0	0	0	0	0	0	0	0	0	0	0	0	0	0	0									870	0	0	0	0	0	0	0	0	0	0	0	0	0	0	0	0	0	0	0
	871	0	0	0	0	0	0	0	0	0	0	0	0	0	0	0	0	0	0	0	0									871	0	0	0	0	0	0	0	0	0	0	0	0	0	0	0	0	0	0	0
	872	0	0	0	0	0	0	0	0	0	0	0	0	0	0	0	0	0	0	0	0									872	0	0	0	0	0	0	0	0	0	0	0	0	0	0	0	0	0	0	0
	873	0	0	0	0	0	0	0	0	0	0	0	0	0	0	0	0	0	0	0	0									873	0	0	0	0	0	0	0	0	0	0	0	0	0	0	0	0	0	0	0
	874	0	0	0	0	0	0	0	0	0	0	0	0	0	0	0	0	0	0	0	0									874	0	0	0	0	0	0	0	0	0	0	0	0	0	0	0	0	0	0	0
	875	0	0	0	0	0	0	0	0	0	0	0	0	0	0	0	0	0	0	0	0									875	0	0	0	0	0	0	0	0	0	0	0	0	0	0	0	0	0	0	0
	876	0	0	0	0	0	0	0	0	0	0	0	0	0	0	0	0	0	0	0	0									876	0	0	0	0	0	0	0	0	0	0	0	0	0	0	0	0	0	0	0
	877	0	0	0	0	0	0	0	0	0	0	0	0	0	0	0	0	0	0	0	0									877	0	0	0	0	0	0	0	0	0	0	0	0	0	0	0	0	0	0	0
	878	0	0	0	0	0	0	0	0	0	0	0	0	0	0	0	0	0	0	0	0									878	0	0	0	0	0	0	0	0	0	0	0	0	0	0	0	0	0	0	0
	879	0	0	0	0	0	0	0	0	0	0	0	0	0	0	0	0	0	0	0	0									879	0	0	0	0	0	0	0	0	0	0	0	0	0	0	0	0	0	0	0
	880	0	0	0	0	0	0	0	0	0	0	0	0	0	0	0	0	0	0	0	0									880	0	0	0	0	0	0	0	0	0	0	0	0	0	0	0	0	0	0	0
	881	0	0	0	0	0	0	0	0	0	0	0	0	0	0	0	0	0	0	0	0									881	0	0	0	0	0	0	0	0	0	0	0	0	0	0	0	0	0	0	0
	882	0	0	0	0	0	0	0	0	0	0	0	0	0	0	0	0	0	0	0	0									882	0	0	0	0	0	0	0	0	0	0	0	0	0	0	0	0	0	0	0
	883	0	0	0	0	0	0	0	0	0	0	0	0	0	0	0	0	0	0	0	0									883	0	0	0	0	0	0	0	0	0	0	0	0	0	0	0	0	0	0	0
	884	0	0	0	0	0	0	0	0	0	0	0	0	0	0	0	0	0	0	0	0									884	0	0	0	0	0	0	0	0	0	0	0	0	0	0	0	0	0	0	0
	885	0	0	0	0	0	0	0	0	0	0	0	0	0	0	0	0	0	0	0	0									885	0	0	0	0	0	0	0	0	0	0	0	0	0	0	0	0	0	0	0
	886	0	0	0	0	0	0	0	0	0	0	0	0	0	0	0	0	0	0	0	0									886	0	0	0	0	0	0	0	0	0	0	0	0	0	0	0	0	0	0	0
	887	0	0	0	0	0	0	0	0	0	0	0	0	0	0	0	0	0	0	0	0									887	0	0	0	0	0	0	0	0	0	0	0	0	0	0	0	0	0	0	0
	888	0	0	0	0	0	0	0	0	0	0	0	0	0	0	0	0	0	0	0	0									888	0	0	0	0	0	0	0	0	0	0	0	0	0	0	0	0	0	0	0
	889	0	0	0	0	0	0	0	0	0	0	0	0	0	0	0	0	0	0	0	0									889	0	0	0	0	0	0	0	0	0	0	0	0	0	0	0	0	0	0	0
	890	0	0	0	0	0	0	0	0	0	0	0	0	0	0	0	0	0	0	0	0									890	0	0	0	0	0	0	0	0	0	0	0	0	0	0	0	0	0	0	0
	891	0	0	0	0	0	0	0	0	0	0	0	0	0	0	0	0	0	0	0	0									891	0	0	0	0	0	0	0	0	0	0	0	0	0	0	0	0	0	0	0
	892	0	0	0	0	0	0	0	0	0	0	0	0	0	0	0	0	0	0	0	0									892	0	0	0	0	0	0	0	0	0	0	0	0	0	0	0	0	0	0	0
	893	0	0	0	0	0	0	0	0	0	0	0	0	0	0	0	0	0	0	0	0									893	0	0	0	0	0	0	0	0	0	0	0	0	0	0	0	0	0	0	0
	894	0	0	0	0	0	0	0	0	0	0	0	0	0	0	0	0	0	0	0	0									894	0	0	0	0	0	0	0	0	0	0	0	0	0	0	0	0	0	0	0
	895	0	0	0	0	0	0	0	0	0	0	0	0	0	0	0	0	0	0	0	0									895	0	0	0	0	0	0	0	0	0	0	0	0	0	0	0	0	0	0	0
	896	0	0	0	0	0	0	0	0	0	0	0	0	0	0	0	0	0	0	0	0									896	0	0	0	0	0	0	0	0	0	0	0	0	0	0	0	0	0	0	0
	897	0	0	0	0	0	0	0	0	0	0	0	0	0	0	0	0	0	0	0	0									897	0	0	0	0	0	0	0	0	0	0	0	0	0	0	0	0	0	0	0
	898	0	0	0	0	0	0	0	0	0	0	0	0	0	0	0	0	0	0	0	0									898	0	0	0	0	0	0	0	0	0	0	0	0	0	0	0	0	0	0	0
	899	0	0	0	0	0	0	0	0	0	0	0	0	0	0	0	0	0	0	0	0									899	0	0	0	0	0	0	0	0	0	0	0	0	0	0	0	0	0	0	0
	900	0	0	0	0	0	0	0	0	0	0	0	0	0	0	0	0	0	0	0	0									900	0	0	0	0	0	0	0	0	0	0	0	0	0	0	0	0	0	0	0
	901	0	0	0	0	0	0	0	0	0	0	0	0	0	0	0	0	0	0	0	0									901	0	0	0	0	0	0	0	0	0	0	0	0	0	0	0	0	0	0	0
	902	0	0	0	0	0	0	0	0	0	0	0	0	0	0	0	0	0	0	0	0									902	0	0	0	0	0	0	0	0	0	0	0	0	0	0	0	0	0	0	0
	903	0	0	0	0	0	0	0	0	0	0	0	0	0	0	0	0	0	0	0	0									903	0	0	0	0	0	0	0	0	0	0	0	0	0	0	0	0	0	0	0
	904	0	0	0	0	0	0	0	0	0	0	0	0	0	0	0	0	0	0	0	0									904	0	0	0	0	0	0	0	0	0	0	0	0	0	0	0	0	0	0	0
	905	0	0	0	0	0	0	0	0	0	0	0	0	0	0	0	0	0	0	0	0									905	0	0	0	0	0	0	0	0	0	0	0	0	0	0	0	0	0	0	0
	906	0	0	0	0	0	0	0	0	0	0	0	0	0	0	0	0	0	0	0	0									906	0	0	0	0	0	0	0	0	0	0	0	0	0	0	0	0	0	0	0
	907	0	0	0	0	0	0	0	0	0	0	0	0	0	0	0	0	0	0	0	0									907	0	0	0	0	0	0	0	0	0	0	0	0	0	0	0	0	0	0	0
	908	0	0	0	0	0	0	0	0	0	0	0	0	0	0	0	0	0	0	0	0									908	0	0	0	0	0	0	0	0	0	0	0	0	0	0	0	0	0	0	0
	909	0	0	0	0	0	0	0	0	0	0	0	0	0	0	0	0	0	0	0	0									909	0	0	0	0	0	0	0	0	0	0	0	0	0	0	0	0	0	0	0
	910	0	0	0	0	0	0	0	0	0	0	0	0	0	0	0	0	0	0	0	0									910	0	0	0	0	0	0	0	0	0	0	0	0	0	0	0	0	0	0	0
	911	0	0	0	0	0	0	0	0	0	0	0	0	0	0	0	0	0	0	0	0									911	0	0	0	0	0	0	0	0	0	0	0	0	0	0	0	0	0	0	0
	912	0	0	0	0	0	0	0	0	0	0	0	0	0	0	0	0	0	0	0	0									912	0	0	0	0	0	0	0	0	0	0	0	0	0	0	0	0	0	0	0
	913	0	0	0	0	0	0	0	0	0	0	0	0	0	0	0	0	0	0	0	0									913	0	0	0	0	0	0	0	0	0	0	0	0	0	0	0	0	0	0	0
	914	0	0	0	0	0	0	0	0	0	0	0	0	0	0	0	0	0	0	0	0									914	0	0	0	0	0	0	0	0	0	0	0	0	0	0	0	0	0	0	0
	915	0	0	0	0	0	0	0	0	0	0	0	0	0	0	0	0	0	0	0	0									915	0	0	0	0	0	0	0	0	0	0	0	0	0	0	0	0	0	0	0
	916	0	0	0	0	0	0	0	0	0	0	0	0	0	0	0	0	0	0	0	0									916	0	0	0	0	0	0	0	0	0	0	0	0	0	0	0	0	0	0	0
	917	0	0	0	0	0	0	0	0	0	0	0	0	0	0	0	0	0	0	0	0									917	0	0	0	0	0	0	0	0	0	0	0	0	0	0	0	0	0	0	0
	918	0	0	0	0	0	0	0	0	0	0	0	0	0	0	0	0	0	0	0	0									918	0	0	0	0	0	0	0	0	0	0	0	0	0	0	0	0	0	0	0
	919	0	0	0	0	0	0	0	0	0	0	0	0	0	0	0	0	0	0	0	0									919	0	0	0	0	0	0	0	0	0	0	0	0	0	0	0	0	0	0	0
	920	0	0	0	0	0	0	0	0	0	0	0	0	0	0	0	0	0	0	0	0									920	0	0	0	0	0	0	0	0	0	0	0	0	0	0	0	0	0	0	0
	921	0	0	0	0	0	0	0	0	0	0	0	0	0	0	0	0	0	0	0	0									921	0	0	0	0	0	0	0	0	0	0	0	0	0	0	0	0	0	0	0
	922	0	0	0	0	0	0	0	0	0	0	0	0	0	0	0	0	0	0	0	0									922	0	0	0	0	0	0	0	0	0	0	0	0	0	0	0	0	0	0	0
	923	0	0	0	0	0	0	0	0	0	0	0	0	0	0	0	0	0	0	0	0									923	0	0	0	0	0	0	0	0	0	0	0	0	0	0	0	0	0	0	0
	924	0	0	0	0	0	0	0	0	0	0	0	0	0	0	0	0	0	0	0	0									924	0	0	0	0	0	0	0	0	0	0	0	0	0	0	0	0	0	0	0
	925	0	0	0	0	0	0	0	0	0	0	0	0	0	0	0	0	0	0	0	0									925	0	0	0	0	0	0	0	0	0	0	0	0	0	0	0	0	0	0	0
	926	0	0	0	0	0	0	0	0	0	0	0	0	0	0	0	0	0	0	0	0									926	0	0	0	0	0	0	0	0	0	0	0	0	0	0	0	0	0	0	0
	927	0	0	0	0	0	0	0	0	0	0	0	0	0	0	0	0	0	0	0	0									927	0	0	0	0	0	0	0	0	0	0	0	0	0	0	0	0	0	0	0
	928	0	0	0	0	0	0	0	0	0	0	0	0	0	0	0	0	0	0	0	0									928	0	0	0	0	0	0	0	0	0	0	0	0	0	0	0	0	0	0	0
	929	0	0	0	0	0	0	0	0	0	0	0	0	0	0	0	0	0	0	0	0									929	0	0	0	0	0	0	0	0	0	0	0	0	0	0	0	0	0	0	0
	930	0	0	0	0	0	0	0	0	0	0	0	0	0	0	0	0	0	0	0	0									930	0	0	0	0	0	0	0	0	0	0	0	0	0	0	0	0	0	0	0
	931	0	0	0	0	0	0	0	0	0	0	0	0	0	0	0	0	0	0	0	0									931	0	0	0	0	0	0	0	0	0	0	0	0	0	0	0	0	0	0	0
	932	0	0	0	0	0	0	0	0	0	0	0	0	0	0	0	0	0	0	0	0									932	0	0	0	0	0	0	0	0	0	0	0	0	0	0	0	0	0	0	0
	933	0	0	0	0	0	0	0	0	0	0	0	0	0	0	0	0	0	0	0	0									933	0	0	0	0	0	0	0	0	0	0	0	0	0	0	0	0	0	0	0
	934	0	0	0	0	0	0	0	0	0	0	0	0	0	0	0	0	0	0	0	0									934	0	0	0	0	0	0	0	0	0	0	0	0	0	0	0	0	0	0	0
	935	0	0	0	0	0	0	0	0	0	0	0	0	0	0	0	0	0	0	0	0									935	0	0	0	0	0	0	0	0	0	0	0	0	0	0	0	0	0	0	0
	936	0	0	0	0	0	0	0	0	0	0	0	0	0	0	0	0	0	0	0	0									936	0	0	0	0	0	0	0	0	0	0	0	0	0	0	0	0	0	0	0
	937	0	0	0	0	0	0	0	0	0	0	0	0	0	0	0	0	0	0	0	0									937	0	0	0	0	0	0	0	0	0	0	0	0	0	0	0	0	0	0	0
	938	0	0	0	0	0	0	0	0	0	0	0	0	0	0	0	0	0	0	0	0									938	0	0	0	0	0	0	0	0	0	0	0	0	0	0	0	0	0	0	0
	939	0	0	0	0	0	0	0	0	0	0	0	0	0	0	0	0	0	0	0	0									939	0	0	0	0	0	0	0	0	0	0	0	0	0	0	0	0	0	0	0
	940	0	0	0	0	0	0	0	0	0	0	0	0	0	0	0	0	0	0	0	0									940	0	0	0	0	0	0	0	0	0	0	0	0	0	0	0	0	0	0	0
	941	0	0	0	0	0	0	0	0	0	0	0	0	0	0	0	0	0	0	0	0									941	0	0	0	0	0	0	0	0	0	0	0	0	0	0	0	0	0	0	0
	942	0	0	0	0	0	0	0	0	0	0	0	0	0	0	0	0	0	0	0	0									942	0	0	0	0	0	0	0	0	0	0	0	0	0	0	0	0	0	0	0
	943	0	0	0	0	0	0	0	0	0	0	0	0	0	0	0	0	0	0	0	0									943	0	0	0	0	0	0	0	0	0	0	0	0	0	0	0	0	0	0	0
	944	0	0	0	0	0	0	0	0	0	0	0	0	0	0	0	0	0	0	0	0									944	0	0	0	0	0	0	0	0	0	0	0	0	0	0	0	0	0	0	0
	945	0	0	0	0	0	0	0	0	0	0	0	0	0	0	0	0	0	0	0	0									945	0	0	0	0	0	0	0	0	0	0	0	0	0	0	0	0	0	0	0
	946	0	0	0	0	0	0	0	0	0	0	0	0	0	0	0	0	0	0	0	0									946	0	0	0	0	0	0	0	0	0	0	0	0	0	0	0	0	0	0	0
	947	0	0	0	0	0	0	0	0	0	0	0	0	0	0	0	0	0	0	0	0									947	0	0	0	0	0	0	0	0	0	0	0	0	0	0	0	0	0	0	0
	948	0	0	0	0	0	0	0	0	0	0	0	0	0	0	0	0	0	0	0	0									948	0	0	0	0	0	0	0	0	0	0	0	0	0	0	0	0	0	0	0
	949	0	0	0	0	0	0	0	0	0	0	0	0	0	0	0	0	0	0	0	0									949	0	0	0	0	0	0	0	0	0	0	0	0	0	0	0	0	0	0	0
	950	0	0	0	0	0	0	0	0	0	0	0	0	0	0	0	0	0	0	0	0									950	0	0	0	0	0	0	0	0	0	0	0	0	0	0	0	0	0	0	0
	951	0	0	0	0	0	0	0	0	0	0	0	0	0	0	0	0	0	0	0	0									951	0	0	0	0	0	0	0	0	0	0	0	0	0	0	0	0	0	0	0
	952	0	0	0	0	0	0	0	0	0	0	0	0	0	0	0	0	0	0	0	0									952	0	0	0	0	0	0	0	0	0	0	0	0	0	0	0	0	0	0	0
	953	0	0	0	0	0	0	0	0	0	0	0	0	0	0	0	0	0	0	0	0									953	0	0	0	0	0	0	0	0	0	0	0	0	0	0	0	0	0	0	0
	954	0	0	0	0	0	0	0	0	0	0	0	0	0	0	0	0	0	0	0	0									954	0	0	0	0	0	0	0	0	0	0	0	0	0	0	0	0	0	0	0
	955	0	0	0	0	0	0	0	0	0	0	0	0	0	0	0	0	0	0	0	0									955	0	0	0	0	0	0	0	0	0	0	0	0	0	0	0	0	0	0	0
	956	0	0	0	0	0	0	0	0	0	0	0	0	0	0	0	0	0	0	0	0									956	0	0	0	0	0	0	0	0	0	0	0	0	0	0	0	0	0	0	0
	957	0	0	0	0	0	0	0	0	0	0	0	0	0	0	0	0	0	0	0	0									957	0	0	0	0	0	0	0	0	0	0	0	0	0	0	0	0	0	0	0
	958	0	0	0	0	0	0	0	0	0	0	0	0	0	0	0	0	0	0	0	0									958	0	0	0	0	0	0	0	0	0	0	0	0	0	0	0	0	0	0	0
	959	0	0	0	0	0	0	0	0	0	0	0	0	0	0	0	0	0	0	0	0									959	0	0	0	0	0	0	0	0	0	0	0	0	0	0	0	0	0	0	0
	960	0	0	0	0	0	0	0	0	0	0	0	0	0	0	0	0	0	0	0	0									960	0	0	0	0	0	0	0	0	0	0	0	0	0	0	0	0	0	0	0
	961	0	0	0	0	0	0	0	0	0	0	0	0	0	0	0	0	0	0	0	0									961	0	0	0	0	0	0	0	0	0	0	0	0	0	0	0	0	0	0	0
	962	0	0	0	0	0	0	0	0	0	0	0	0	0	0	0	0	0	0	0	0									962	0	0	0	0	0	0	0	0	0	0	0	0	0	0	0	0	0	0	0
	963	0	0	0	0	0	0	0	0	0	0	0	0	0	0	0	0	0	0	0	0									963	0	0	0	0	0	0	0	0	0	0	0	0	0	0	0	0	0	0	0
	964	0	0	0	0	0	0	0	0	0	0	0	0	0	0	0	0	0	0	0	0									964	0	0	0	0	0	0	0	0	0	0	0	0	0	0	0	0	0	0	0
	965	0	0	0	0	0	0	0	0	0	0	0	0	0	0	0	0	0	0	0	0									965	0	0	0	0	0	0	0	0	0	0	0	0	0	0	0	0	0	0	0
	966	0	0	0	0	0	0	0	0	0	0	0	0	0	0	0	0	0	0	0	0									966	0	0	0	0	0	0	0	0	0	0	0	0	0	0	0	0	0	0	0
	967	0	0	0	0	0	0	0	0	0	0	0	0	0	0	0	0	0	0	0	0									967	0	0	0	0	0	0	0	0	0	0	0	0	0	0	0	0	0	0	0
	968	0	0	0	0	0	0	0	0	0	0	0	0	0	0	0	0	0	0	0	0									968	0	0	0	0	0	0	0	0	0	0	0	0	0	0	0	0	0	0	0
	969	0	0	0	0	0	0	0	0	0	0	0	0	0	0	0	0	0	0	0	0									969	0	0	0	0	0	0	0	0	0	0	0	0	0	0	0	0	0	0	0
	970	0	0	0	0	0	0	0	0	0	0	0	0	0	0	0	0	0	0	0	0									970	0	0	0	0	0	0	0	0	0	0	0	0	0	0	0	0	0	0	0
	971	0	0	0	0	0	0	0	0	0	0	0	0	0	0	0	0	0	0	0	0									971	0	0	0	0	0	0	0	0	0	0	0	0	0	0	0	0	0	0	0
	972	0	0	0	0	0	0	0	0	0	0	0	0	0	0	0	0	0	0	0	0									972	0	0	0	0	0	0	0	0	0	0	0	0	0	0	0	0	0	0	0
	973	0	0	0	0	0	0	0	0	0	0	0	0	0	0	0	0	0	0	0	0									973	0	0	0	0	0	0	0	0	0	0	0	0	0	0	0	0	0	0	0
	974	0	0	0	0	0	0	0	0	0	0	0	0	0	0	0	0	0	0	0	0									974	0	0	0	0	0	0	0	0	0	0	0	0	0	0	0	0	0	0	0
	975	0	0	0	0	0	0	0	0	0	0	0	0	0	0	0	0	0	0	0	0									975	0	0	0	0	0	0	0	0	0	0	0	0	0	0	0	0	0	0	0
	976	0	0	0	0	0	0	0	0	0	0	0	0	0	0	0	0	0	0	0	0									976	0	0	0	0	0	0	0	0	0	0	0	0	0	0	0	0	0	0	0
	977	0	0	0	0	0	0	0	0	0	0	0	0	0	0	0	0	0	0	0	0									977	0	0	0	0	0	0	0	0	0	0	0	0	0	0	0	0	0	0	0
	978	0	0	0	0	0	0	0	0	0	0	0	0	0	0	0	0	0	0	0	0									978	0	0	0	0	0	0	0	0	0	0	0	0	0	0	0	0	0	0	0
	979	0	0	0	0	0	0	0	0	0	0	0	0	0	0	0	0	0	0	0	0									979	0	0	0	0	0	0	0	0	0	0	0	0	0	0	0	0	0	0	0
	980	0	0	0	0	0	0	0	0	0	0	0	0	0	0	0	0	0	0	0	0									980	0	0	0	0	0	0	0	0	0	0	0	0	0	0	0	0	0	0	0
	981	0	0	0	0	0	0	0	0	0	0	0	0	0	0	0	0	0	0	0	0									981	0	0	0	0	0	0	0	0	0	0	0	0	0	0	0	0	0	0	0
	982	0	0	0	0	0	0	0	0	0	0	0	0	0	0	0	0	0	0	0	0									982	0	0	0	0	0	0	0	0	0	0	0	0	0	0	0	0	0	0	0
	983	0	0	0	0	0	0	0	0	0	0	0	0	0	0	0	0	0	0	0	0									983	0	0	0	0	0	0	0	0	0	0	0	0	0	0	0	0	0	0	0
	984	0	0	0	0	0	0	0	0	0	0	0	0	0	0	0	0	0	0	0	0									984	0	0	0	0	0	0	0	0	0	0	0	0	0	0	0	0	0	0	0
	985	0	0	0	0	0	0	0	0	0	0	0	0	0	0	0	0	0	0	0	0									985	0	0	0	0	0	0	0	0	0	0	0	0	0	0	0	0	0	0	0
	986	0	0	0	0	0	0	0	0	0	0	0	0	0	0	0	0	0	0	0	0									986	0	0	0	0	0	0	0	0	0	0	0	0	0	0	0	0	0	0	0
	987	0	0	0	0	0	0	0	0	0	0	0	0	0	0	0	0	0	0	0	0									987	0	0	0	0	0	0	0	0	0	0	0	0	0	0	0	0	0	0	0
	988	0	0	0	0	0	0	0	0	0	0	0	0	0	0	0	0	0	0	0	0									988	0	0	0	0	0	0	0	0	0	0	0	0	0	0	0	0	0	0	0
	989	0	0	0	0	0	0	0	0	0	0	0	0	0	0	0	0	0	0	0	0									989	0	0	0	0	0	0	0	0	0	0	0	0	0	0	0	0	0	0	0
	990	0	0	0	0	0	0	0	0	0	0	0	0	0	0	0	0	0	0	0	0									990	0	0	0	0	0	0	0	0	0	0	0	0	0	0	0	0	0	0	0
	991	0	0	0	0	0	0	0	0	0	0	0	0	0	0	0	0	0	0	0	0									991	0	0	0	0	0	0	0	0	0	0	0	0	0	0	0	0	0	0	0
	992	0	0	0	0	0	0	0	0	0	0	0	0	0	0	0	0	0	0	0	0									992	0	0	0	0	0	0	0	0	0	0	0	0	0	0	0	0	0	0	0
	993	0	0	0	0	0	0	0	0	0	0	0	0	0	0	0	0	0	0	0	0									993	0	0	0	0	0	0	0	0	0	0	0	0	0	0	0	0	0	0	0
	994	0	0	0	0	0	0	0	0	0	0	0	0	0	0	0	0	0	0	0	0									994	0	0	0	0	0	0	0	0	0	0	0	0	0	0	0	0	0	0	0
	995	0	0	0	0	0	0	0	0	0	0	0	0	0	0	0	0	0	0	0	0									995	0	0	0	0	0	0	0	0	0	0	0	0	0	0	0	0	0	0	0
	996	0	0	0	0	0	0	0	0	0	0	0	0	0	0	0	0	0	0	0	0									996	0	0	0	0	0	0	0	0	0	0	0	0	0	0	0	0	0	0	0
	997	0	0	0	0	0	0	0	0	0	0	0	0	0	0	0	0	0	0	0	0									997	0	0	0	0	0	0	0	0	0	0	0	0	0	0	0	0	0	0	0
	998	0	0	0	0	0	0	0	0	0	0	0	0	0	0	0	0	0	0	0	0									998	0	0	0	0	0	0	0	0	0	0	0	0	0	0	0	0	0	0	0
	999	0	0	0	0	0	0	0	0	0	0	0	0	0	0	0	0	0	0	0	0									999	0	0	0	0	0	0	0	0	0	0	0	0	0	0	0	0	0	0	0
	1000	0	0	0	0	0	0	0	0	0	0	0	0	0	0	0	0	0	0	0	0									1000	0	0	0	0	0	0	0	0	0	0	0	0	0	0	0	0	0	0	0
	1001	0	0	0	0	0	0	0	0	0	0	0	0	0	0	0	0	0	0	0	0									1001	0	0	0	0	0	0	0	0	0	0	0	0	0	0	0	0	0	0	0
	1002	0	0	0	0	0	0	0	0	0	0	0	0	0	0	0	0	0	0	0	0									1002	0	0	0	0	0	0	0	0	0	0	0	0	0	0	0	0	0	0	0
	1003	0	0	0	0	0	0	0	0	0	0	0	0	0	0	0	0	0	0	0	0									1003	0	0	0	0	0	0	0	0	0	0	0	0	0	0	0	0	0	0	0
	1004	0	0	0	0	0	0	0	0	0	0	0	0	0	0	0	0	0	0	0	0									1004	0	0	0	0	0	0	0	0	0	0	0	0	0	0	0	0	0	0	0
	1005	0	0	0	0	0	0	0	0	0	0	0	0	0	0	0	0	0	0	0	0									1005	0	0	0	0	0	0	0	0	0	0	0	0	0	0	0	0	0	0	0
	1006	0	0	0	0	0	0	0	0	0	0	0	0	0	0	0	0	0	0	0	0									1006	0	0	0	0	0	0	0	0	0	0	0	0	0	0	0	0	0	0	0
	1007	0	0	0	0	0	0	0	0	0	0	0	0	0	0	0	0	0	0	0	0									1007	0	0	0	0	0	0	0	0	0	0	0	0	0	0	0	0	0	0	0
	1008	0	0	0	0	0	0	0	0	0	0	0	0	0	0	0	0	0	0	0	0									1008	0	0	0	0	0	0	0	0	0	0	0	0	0	0	0	0	0	0	0
	1009	0	0	0	0	0	0	0	0	0	0	0	0	0	0	0	0	0	0	0	0									1009	0	0	0	0	0	0	0	0	0	0	0	0	0	0	0	0	0	0	0
	1010	0	0	0	0	0	0	0	0	0	0	0	0	0	0	0	0	0	0	0	0									1010	0	0	0	0	0	0	0	0	0	0	0	0	0	0	0	0	0	0	0
	1011	0	0	0	0	0	0	0	0	0	0	0	0	0	0	0	0	0	0	0	0									1011	0	0	0	0	0	0	0	0	0	0	0	0	0	0	0	0	0	0	0
	1012	0	0	0	0	0	0	0	0	0	0	0	0	0	0	0	0	0	0	0	0									1012	0	0	0	0	0	0	0	0	0	0	0	0	0	0	0	0	0	0	0
	1013	0	0	0	0	0	0	0	0	0	0	0	0	0	0	0	0	0	0	0	0									1013	0	0	0	0	0	0	0	0	0	0	0	0	0	0	0	0	0	0	0
	1014	0	0	0	0	0	0	0	0	0	0	0	0	0	0	0	0	0	0	0	0									1014	0	0	0	0	0	0	0	0	0	0	0	0	0	0	0	0	0	0	0
	1015	0	0	0	0	0	0	0	0	0	0	0	0	0	0	0	0	0	0	0	0									1015	0	0	0	0	0	0	0	0	0	0	0	0	0	0	0	0	0	0	0
	1016	0	0	0	0	0	0	0	0	0	0	0	0	0	0	0	0	0	0	0	0									1016	0	0	0	0	0	0	0	0	0	0	0	0	0	0	0	0	0	0	0
	1017	0	0	0	0	0	0	0	0	0	0	0	0	0	0	0	0	0	0	0	0									1017	0	0	0	0	0	0	0	0	0	0	0	0	0	0	0	0	0	0	0
	1018	0	0	0	0	0	0	0	0	0	0	0	0	0	0	0	0	0	0	0	0									1018	0	0	0	0	0	0	0	0	0	0	0	0	0	0	0	0	0	0	0
	1019	0	0	0	0	0	0	0	0	0	0	0	0	0	0	0	0	0	0	0	0									1019	0	0	0	0	0	0	0	0	0	0	0	0	0	0	0	0	0	0	0
	1020	0	0	0	0	0	0	0	0	0	0	0	0	0	0	0	0	0	0	0	0									1020	0	0	0	0	0	0	0	0	0	0	0	0	0	0	0	0	0	0	0
	1021	0	0	0	0	0	0	0	0	0	0	0	0	0	0	0	0	0	0	0	0									1021	0	0	0	0	0	0	0	0	0	0	0	0	0	0	0	0	0	0	0
	1022	0	0	0	0	0	0	0	0	0	0	0	0	0	0	0	0	0	0	0	0									1022	0	0	0	0	0	0	0	0	0	0	0	0	0	0	0	0	0	0	0
	1023	0	0	0	0	0	0	0	0	0	0	0	0	0	0	0	0	0	0	0	0									1023	0	0	0	0	0	0	0	0	0	0	0	0	0	0	0	0	0	0	0
	1024	0	0	0	0	0	0	0	0	0	0	0	0	0	0	0	0	0	0	0	0									1024	0	0	0	0	0	0	0	0	0	0	0	0	0	0	0	0	0	0	0
	1025	0	0	0	0	0	0	0	0	0	0	0	0	0	0	0	0	0	0	0	0									1025	0	0	0	0	0	0	0	0	0	0	0	0	0	0	0	0	0	0	0
	1026	0	0	0	0	0	0	0	0	0	0	0	0	0	0	0	0	0	0	0	0									1026	0	0	0	0	0	0	0	0	0	0	0	0	0	0	0	0	0	0	0
	1027	0	0	0	0	0	0	0	0	0	0	0	0	0	0	0	0	0	0	0	0									1027	0	0	0	0	0	0	0	0	0	0	0	0	0	0	0	0	0	0	0
	1028	0	0	0	0	0	0	0	0	0	0	0	0	0	0	0	0	0	0	0	0									1028	0	0	0	0	0	0	0	0	0	0	0	0	0	0	0	0	0	0	0
	1029	0	0	0	0	0	0	0	0	0	0	0	0	0	0	0	0	0	0	0	0									1029	0	0	0	0	0	0	0	0	0	0	0	0	0	0	0	0	0	0	0
	1030	0	0	0	0	0	0	0	0	0	0	0	0	0	0	0	0	0	0	0	0									1030	0	0	0	0	0	0	0	0	0	0	0	0	0	0	0	0	0	0	0
	1031	0	0	0	0	0	0	0	0	0	0	0	0	0	0	0	0	0	0	0	0									1031	0	0	0	0	0	0	0	0	0	0	0	0	0	0	0	0	0	0	0
	1032	0	0	0	0	0	0	0	0	0	0	0	0	0	0	0	0	0	0	0	0									1032	0	0	0	0	0	0	0	0	0	0	0	0	0	0	0	0	0	0	0
	1033	0	0	0	0	0	0	0	0	0	0	0	0	0	0	0	0	0	0	0	0									1033	0	0	0	0	0	0	0	0	0	0	0	0	0	0	0	0	0	0	0
	1034	0	0	0	0	0	0	0	0	0	0	0	0	0	0	0	0	0	0	0	0									1034	0	0	0	0	0	0	0	0	0	0	0	0	0	0	0	0	0	0	0
	1035	0	0	0	0	0	0	0	0	0	0	0	0	0	0	0	0	0	0	0	0									1035	0	0	0	0	0	0	0	0	0	0	0	0	0	0	0	0	0	0	0
	1036	0	0	0	0	0	0	0	0	0	0	0	0	0	0	0	0	0	0	0	0									1036	0	0	0	0	0	0	0	0	0	0	0	0	0	0	0	0	0	0	0
	1037	0	0	0	0	0	0	0	0	0	0	0	0	0	0	0	0	0	0	0	0									1037	0	0	0	0	0	0	0	0	0	0	0	0	0	0	0	0	0	0	0
	1038	0	0	0	0	0	0	0	0	0	0	0	0	0	0	0	0	0	0	0	0									1038	0	0	0	0	0	0	0	0	0	0	0	0	0	0	0	0	0	0	0
	1039	0	0	0	0	0	0	0	0	0	0	0	0	0	0	0	0	0	0	0	0									1039	0	0	0	0	0	0	0	0	0	0	0	0	0	0	0	0	0	0	0
	1040	0	0	0	0	0	0	0	0	0	0	0	0	0	0	0	0	0	0	0	0									1040	0	0	0	0	0	0	0	0	0	0	0	0	0	0	0	0	0	0	0
	1041	0	0	0	0	0	0	0	0	0	0	0	0	0	0	0	0	0	0	0	0									1041	0	0	0	0	0	0	0	0	0	0	0	0	0	0	0	0	0	0	0
	1042	0	0	0	0	0	0	0	0	0	0	0	0	0	0	0	0	0	0	0	0									1042	0	0	0	0	0	0	0	0	0	0	0	0	0	0	0	0	0	0	0
	1043	0	0	0	0	0	0	0	0	0	0	0	0	0	0	0	0	0	0	0	0									1043	0	0	0	0	0	0	0	0	0	0	0	0	0	0	0	0	0	0	0
	1044	0	0	0	0	0	0	0	0	0	0	0	0	0	0	0	0	0	0	0	0									1044	0	0	0	0	0	0	0	0	0	0	0	0	0	0	0	0	0	0	0
	1045	0	0	0	0	0	0	0	0	0	0	0	0	0	0	0	0	0	0	0	0									1045	0	0	0	0	0	0	0	0	0	0	0	0	0	0	0	0	0	0	0
	1046	0	0	0	0	0	0	0	0	0	0	0	0	0	0	0	0	0	0	0	0									1046	0	0	0	0	0	0	0	0	0	0	0	0	0	0	0	0	0	0	0
	1047	0	0	0	0	0	0	0	0	0	0	0	0	0	0	0	0	0	0	0	0									1047	0	0	0	0	0	0	0	0	0	0	0	0	0	0	0	0	0	0	0
	1048	0	0	0	0	0	0	0	0	0	0	0	0	0	0	0	0	0	0	0	0									1048	0	0	0	0	0	0	0	0	0	0	0	0	0	0	0	0	0	0	0
	1049	0	0	0	0	0	0	0	0	0	0	0	0	0	0	0	0	0	0	0	0									1049	0	0	0	0	0	0	0	0	0	0	0	0	0	0	0	0	0	0	0
	1050	0	0	0	0	0	0	0	0	0	0	0	0	0	0	0	0	0	0	0	0									1050	0	0	0	0	0	0	0	0	0	0	0	0	0	0	0	0	0	0	0
	1051	0	0	0	0	0	0	0	0	0	0	0	0	0	0	0	0	0	0	0	0									1051	0	0	0	0	0	0	0	0	0	0	0	0	0	0	0	0	0	0	0
	1052	0	0	0	0	0	0	0	0	0	0	0	0	0	0	0	0	0	0	0	0									1052	0	0	0	0	0	0	0	0	0	0	0	0	0	0	0	0	0	0	0
	1053	0	0	0	0	0	0	0	0	0	0	0	0	0	0	0	0	0	0	0	0									1053	0	0	0	0	0	0	0	0	0	0	0	0	0	0	0	0	0	0	0
	1054	0	0	0	0	0	0	0	0	0	0	0	0	0	0	0	0	0	0	0	0									1054	0	0	0	0	0	0	0	0	0	0	0	0	0	0	0	0	0	0	0
	1055	0	0	0	0	0	0	0	0	0	0	0	0	0	0	0	0	0	0	0	0									1055	0	0	0	0	0	0	0	0	0	0	0	0	0	0	0	0	0	0	0
	1056	0	0	0	0	0	0	0	0	0	0	0	0	0	0	0	0	0	0	0	0									1056	0	0	0	0	0	0	0	0	0	0	0	0	0	0	0	0	0	0	0
	1057	0	0	0	0	0	0	0	0	0	0	0	0	0	0	0	0	0	0	0	0									1057	0	0	0	0	0	0	0	0	0	0	0	0	0	0	0	0	0	0	0
	1058	0	0	0	0	0	0	0	0	0	0	0	0	0	0	0	0	0	0	0	0									1058	0	0	0	0	0	0	0	0	0	0	0	0	0	0	0	0	0	0	0
	1059	0	0	0	0	0	0	0	0	0	0	0	0	0	0	0	0	0	0	0	0									1059	0	0	0	0	0	0	0	0	0	0	0	0	0	0	0	0	0	0	0
	1060	0	0	0	0	0	0	0	0	0	0	0	0	0	0	0	0	0	0	0	0									1060	0	0	0	0	0	0	0	0	0	0	0	0	0	0	0	0	0	0	0
	1061	0	0	0	0	0	0	0	0	0	0	0	0	0	0	0	0	0	0	0	0									1061	0	0	0	0	0	0	0	0	0	0	0	0	0	0	0	0	0	0	0
	1062	0	0	0	0	0	0	0	0	0	0	0	0	0	0	0	0	0	0	0	0									1062	0	0	0	0	0	0	0	0	0	0	0	0	0	0	0	0	0	0	0
	1063	0	0	0	0	0	0	0	0	0	0	0	0	0	0	0	0	0	0	0	0									1063	0	0	0	0	0	0	0	0	0	0	0	0	0	0	0	0	0	0	0
	1064	0	0	0	0	0	0	0	0	0	0	0	0	0	0	0	0	0	0	0	0									1064	0	0	0	0	0	0	0	0	0	0	0	0	0	0	0	0	0	0	0
	1065	0	0	0	0	0	0	0	0	0	0	0	0	0	0	0	0	0	0	0	0									1065	0	0	0	0	0	0	0	0	0	0	0	0	0	0	0	0	0	0	0
	1066	0	0	0	0	0	0	0	0	0	0	0	0	0	0	0	0	0	0	0	0									1066	0	0	0	0	0	0	0	0	0	0	0	0	0	0	0	0	0	0	0
	1067	0	0	0	0	0	0	0	0	0	0	0	0	0	0	0	0	0	0	0	0									1067	0	0	0	0	0	0	0	0	0	0	0	0	0	0	0	0	0	0	0
	1068	0	0	0	0	0	0	0	0	0	0	0	0	0	0	0	0	0	0	0	0									1068	0	0	0	0	0	0	0	0	0	0	0	0	0	0	0	0	0	0	0
	1069	0	0	0	0	0	0	0	0	0	0	0	0	0	0	0	0	0	0	0	0									1069	0	0	0	0	0	0	0	0	0	0	0	0	0	0	0	0	0	0	0
	1070	0	0	0	0	0	0	0	0	0	0	0	0	0	0	0	0	0	0	0	0
	1071	0	0	0	0	0	0	0	0	0	0	0	0	0	0	0	0	0	0	0	0
	1072	0	0	0	0	0	0	0	0	0	0	0	0	0	0	0	0	0	0	0	0
	1073	0	0	0	0	0	0	0	0	0	0	0	0	0	0	0	0	0	0	0	0
	1074	0	0	0	0	0	0	0	0	0	0	0	0	0	0	0	0	0	0	0	0
	1075	0	0	0	0	0	0	0	0	0	0	0	0	0	0	0	0	0	0	0	0
	1076	0	0	0	0	0	0	0	0	0	0	0	0	0	0	0	0	0	0	0	0
	1077	0	0	0	0	0	0	0	0	0	0	0	0	0	0	0	0	0	0	0	0
	1078	0	0	0	0	0	0	0	0	0	0	0	0	0	0	0	0	0	0	0	0
	1079	0	0	0	0	0	0	0	0	0	0	0	0	0	0	0	0	0	0	0	0
	1080	0	0	0	0	0	0	0	0	0	0	0	0	0	0	0	0	0	0	0	0
	1081	0	0	0	0	0	0	0	0	0	0	0	0	0	0	0	0	0	0	0	0
	1082	0	0	0	0	0	0	0	0	0	0	0	0	0	0	0	0	0	0	0	0
	1083	0	0	0	0	0	0	0	0	0	0	0	0	0	0	0	0	0	0	0	0
	1084	0	0	0	0	0	0	0	0	0	0	0	0	0	0	0	0	0	0	0	0
	1085	0	0	0	0	0	0	0	0	0	0	0	0	0	0	0	0	0	0	0	0
	1086	0	0	0	0	0	0	0	0	0	0	0	0	0	0	0	0	0	0	0	0
	1087	0	0	0	0	0	0	0	0	0	0	0	0	0	0	0	0	0	0	0	0
	1088	0	0	0	0	0	0	0	0	0	0	0	0	0	0	0	0	0	0	0	0
	1089	0	0	0	0	0	0	0	0	0	0	0	0	0	0	0	0	0	0	0	0
	1090	0	0	0	0	0	0	0	0	0	0	0	0	0	0	0	0	0	0	0	0
	1091	0	0	0	0	0	0	0	0	0	0	0	0	0	0	0	0	0	0	0	0
	1092	0	0	0	0	0	0	0	0	0	0	0	0	0	0	0	0	0	0	0	0
	1093	0	0	0	0	0	0	0	0	0	0	0	0	0	0	0	0	0	0	0	0
	1094	0	0	0	0	0	0	0	0	0	0	0	0	0	0	0	0	0	0	0	0
	1095	0	0	0	0	0	0	0	0	0	0	0	0	0	0	0	0	0	0	0	0
	1096	0	0	0	0	0	0	0	0	0	0	0	0	0	0	0	0	0	0	0	0
	1097	0	0	0	0	0	0	0	0	0	0	0	0	0	0	0	0	0	0	0	0
	1098	0	0	0	0	0	0	0	0	0	0	0	0	0	0	0	0	0	0	0	0
	1099	0	0	0	0	0	0	0	0	0	0	0	0	0	0	0	0	0	0	0	0
	1100	0	0	0	0	0	0	0	0	0	0	0	0	0	0	0	0	0	0	0	0
	1101	0	0	0	0	0	0	0	0	0	0	0	0	0	0	0	0	0	0	0	0
	1102	0	0	0	0	0	0	0	0	0	0	0	0	0	0	0	0	0	0	0	0
	1103	0	0	0	0	0	0	0	0	0	0	0	0	0	0	0	0	0	0	0	0
	1104	0	0	0	0	0	0	0	0	0	0	0	0	0	0	0	0	0	0	0	0
	1105	0	0	0	0	0	0	0	0	0	0	0	0	0	0	0	0	0	0	0	0
	1106	0	0	0	0	0	0	0	0	0	0	0	0	0	0	0	0	0	0	0	0
	1107	0	0	0	0	0	0	0	0	0	0	0	0	0	0	0	0	0	0	0	0
	1108	0	0	0	0	0	0	0	0	0	0	0	0	0	0	0	0	0	0	0	0
	1109	0	0	0	0	0	0	0	0	0	0	0	0	0	0	0	0	0	0	0	0
	1110	0	0	0	0	0	0	0	0	0	0	0	0	0	0	0	0	0	0	0	0
	1111	0	0	0	0	0	0	0	0	0	0	0	0	0	0	0	0	0	0	0	0
	1112	0	0	0	0	0	0	0	0	0	0	0	0	0	0	0	0	0	0	0	0
	1113	0	0	0	0	0	0	0	0	0	0	0	0	0	0	0	0	0	0	0	0
	1114	0	0	0	0	0	0	0	0	0	0	0	0	0	0	0	0	0	0	0	0
	1115	0	0	0	0	0	0	0	0	0	0	0	0	0	0	0	0	0	0	0	0
	1116	0	0	0	0	0	0	0	0	0	0	0	0	0	0	0	0	0	0	0	0
	1117	0	0	0	0	0	0	0	0	0	0	0	0	0	0	0	0	0	0	0	0
	1118	0	0	0	0	0	0	0	0	0	0	0	0	0	0	0	0	0	0	0	0
	1119	0	0	0	0	0	0	0	0	0	0	0	0	0	0	0	0	0	0	0	0
	1120	0	0	0	0	0	0	0	0	0	0	0	0	0	0	0	0	0	0	0	0
	1121	0	0	0	0	0	0	0	0	0	0	0	0	0	0	0	0	0	0	0	0
	1122	0	0	0	0	0	0	0	0	0	0	0	0	0	0	0	0	0	0	0	0
	1123	0	0	0	0	0	0	0	0	0	0	0	0	0	0	0	0	0	0	0	0
	1124	0	0	0	0	0	0	0	0	0	0	0	0	0	0	0	0	0	0	0	0
	1125	0	0	0	0	0	0	0	0	0	0	0	0	0	0	0	0	0	0	0	0
	1126	0	0	0	0	0	0	0	0	0	0	0	0	0	0	0	0	0	0	0	0
	1127	0	0	0	0	0	0	0	0	0	0	0	0	0	0	0	0	0	0	0	0
	1128	0	0	0	0	0	0	0	0	0	0	0	0	0	0	0	0	0	0	0	0
	1129	0	0	0	0	0	0	0	0	0	0	0	0	0	0	0	0	0	0	0	0
	1130	0	0	0	0	0	0	0	0	0	0	0	0	0	0	0	0	0	0	0	0
	1131	0	0	0	0	0	0	0	0	0	0	0	0	0	0	0	0	0	0	0	0
	1132	0	0	0	0	0	0	0	0	0	0	0	0	0	0	0	0	0	0	0	0
	1133	0	0	0	0	0	0	0	0	0	0	0	0	0	0	0	0	0	0	0	0
	1134	0	0	0	0	0	0	0	0	0	0	0	0	0	0	0	0	0	0	0	0
	1135	0	0	0	0	0	0	0	0	0	0	0	0	0	0	0	0	0	0	0	0
	1136	0	0	0	0	0	0	0	0	0	0	0	0	0	0	0	0	0	0	0	0
	1137	0	0	0	0	0	0	0	0	0	0	0	0	0	0	0	0	0	0	0	0
	1138	0	0	0	0	0	0	0	0	0	0	0	0	0	0	0	0	0	0	0	0
	1139	0	0	0	0	0	0	0	0	0	0	0	0	0	0	0	0	0	0	0	0
	1140	0	0	0	0	0	0	0	0	0	0	0	0	0	0	0	0	0	0	0	0
	1141	0	0	0	0	0	0	0	0	0	0	0	0	0	0	0	0	0	0	0	0
	1142	0	0	0	0	0	0	0	0	0	0	0	0	0	0	0	0	0	0	0	0
	1143	0	0	0	0	0	0	0	0	0	0	0	0	0	0	0	0	0	0	0	0
	1144	0	0	0	0	0	0	0	0	0	0	0	0	0	0	0	0	0	0	0	0
	1145	0	0	0	0	0	0	0	0	0	0	0	0	0	0	0	0	0	0	0	0
	1146	0	0	0	0	0	0	0	0	0	0	0	0	0	0	0	0	0	0	0	0
	1147	0	0	0	0	0	0	0	0	0	0	0	0	0	0	0	0	0	0	0	0
	1148	0	0	0	0	0	0	0	0	0	0	0	0	0	0	0	0	0	0	0	0
	1149	0	0	0	0	0	0	0	0	0	0	0	0	0	0	0	0	0	0	0	0
	1150	0	0	0	0	0	0	0	0	0	0	0	0	0	0	0	0	0	0	0	0
	1151	0	0	0	0	0	0	0	0	0	0	0	0	0	0	0	0	0	0	0	0
	1152	0	0	0	0	0	0	0	0	0	0	0	0	0	0	0	0	0	0	0	0
	1153	0	0	0	0	0	0	0	0	0	0	0	0	0	0	0	0	0	0	0	0
	1154	0	0	0	0	0	0	0	0	0	0	0	0	0	0	0	0	0	0	0	0
	1155	0	0	0	0	0	0	0	0	0	0	0	0	0	0	0	0	0	0	0	0
	1156	0	0	0	0	0	0	0	0	0	0	0	0	0	0	0	0	0	0	0	0
	1157	0	0	0	0	0	0	0	0	0	0	0	0	0	0	0	0	0	0	0	0
	1158	0	0	0	0	0	0	0	0	0	0	0	0	0	0	0	0	0	0	0	0
	1159	0	0	0	0	0	0	0	0	0	0	0	0	0	0	0	0	0	0	0	0
	1160	0	0	0	0	0	0	0	0	0	0	0	0	0	0	0	0	0	0	0	0
	1161	0	0	0	0	0	0	0	0	0	0	0	0	0	0	0	0	0	0	0	0
	1162	0	0	0	0	0	0	0	0	0	0	0	0	0	0	0	0	0	0	0	0
	1163	0	0	0	0	0	0	0	0	0	0	0	0	0	0	0	0	0	0	0	0
	1164	0	0	0	0	0	0	0	0	0	0	0	0	0	0	0	0	0	0	0	0
	1165	0	0	0	0	0	0	0	0	0	0	0	0	0	0	0	0	0	0	0	0
	1166	0	0	0	0	0	0	0	0	0	0	0	0	0	0	0	0	0	0	0	0
	1167	0	0	0	0	0	0	0	0	0	0	0	0	0	0	0	0	0	0	0	0
	1168	0	0	0	0	0	0	0	0	0	0	0	0	0	0	0	0	0	0	0	0
	1169	0	0	0	0	0	0	0	0	0	0	0	0	0	0	0	0	0	0	0	0
	1170	0	0	0	0	0	0	0	0	0	0	0	0	0	0	0	0	0	0	0	0
	1171	0	0	0	0	0	0	0	0	0	0	0	0	0	0	0	0	0	0	0	0
	1172	0	0	0	0	0	0	0	0	0	0	0	0	0	0	0	0	0	0	0	0
	1173	0	0	0	0	0	0	0	0	0	0	0	0	0	0	0	0	0	0	0	0
	1174	0	0	0	0	0	0	0	0	0	0	0	0	0	0	0	0	0	0	0	0
	1175	0	0	0	0	0	0	0	0	0	0	0	0	0	0	0	0	0	0	0	0
	1176	0	0	0	0	0	0	0	0	0	0	0	0	0	0	0	0	0	0	0	0
	1177	0	0	0	0	0	0	0	0	0	0	0	0	0	0	0	0	0	0	0	0
	1178	0	0	0	0	0	0	0	0	0	0	0	0	0	0	0	0	0	0	0	0
	1179	0	0	0	0	0	0	0	0	0	0	0	0	0	0	0	0	0	0	0	0
	1180	0	0	0	0	0	0	0	0	0	0	0	0	0	0	0	0	0	0	0	0
	1181	0	0	0	0	0	0	0	0	0	0	0	0	0	0	0	0	0	0	0	0
	1182	0	0	0	0	0	0	0	0	0	0	0	0	0	0	0	0	0	0	0	0
	1183	0	0	0	0	0	0	0	0	0	0	0	0	0	0	0	0	0	0	0	0
	1184	0	0	0	0	0	0	0	0	0	0	0	0	0	0	0	0	0	0	0	0
	1185	0	0	0	0	0	0	0	0	0	0	0	0	0	0	0	0	0	0	0	0
	1186	0	0	0	0	0	0	0	0	0	0	0	0	0	0	0	0	0	0	0	0
	1187	0	0	0	0	0	0	0	0	0	0	0	0	0	0	0	0	0	0	0	0
	1188	0	0	0	0	0	0	0	0	0	0	0	0	0	0	0	0	0	0	0	0
	1189	0	0	0	0	0	0	0	0	0	0	0	0	0	0	0	0	0	0	0	0
	1190	0	0	0	0	0	0	0	0	0	0	0	0	0	0	0	0	0	0	0	0
	1191	0	0	0	0	0	0	0	0	0	0	0	0	0	0	0	0	0	0	0	0
	1192	0	0	0	0	0	0	0	0	0	0	0	0	0	0	0	0	0	0	0	0
	1193	0	0	0	0	0	0	0	0	0	0	0	0	0	0	0	0	0	0	0	0
	1194	0	0	0	0	0	0	0	0	0	0	0	0	0	0	0	0	0	0	0	0
	1195	0	0	0	0	0	0	0	0	0	0	0	0	0	0	0	0	0	0	0	0
	1196	0	0	0	0	0	0	0	0	0	0	0	0	0	0	0	0	0	0	0	0
	1197	0	0	0	0	0	0	0	0	0	0	0	0	0	0	0	0	0	0	0	0
	1198	0	0	0	0	0	0	0	0	0	0	0	0	0	0	0	0	0	0	0	0
	1199	0	0	0	0	0	0	0	0	0	0	0	0	0	0	0	0	0	0	0	0
	1200	0	0	0	0	0	0	0	0	0	0	0	0	0	0	0	0	0	0	0	0
	1201	0	0	0	0	0	0	0	0	0	0	0	0	0	0	0	0	0	0	0	0
	1202	0	0	0	0	0	0	0	0	0	0	0	0	0	0	0	0	0	0	0	0
	1203	0	0	0	0	0	0	0	0	0	0	0	0	0	0	0	0	0	0	0	0
	1204	0	0	0	0	0	0	0	0	0	0	0	0	0	0	0	0	0	0	0	0
	1205	0	0	0	0	0	0	0	0	0	0	0	0	0	0	0	0	0	0	0	0
	1206	0	0	0	0	0	0	0	0	0	0	0	0	0	0	0	0	0	0	0	0
	1207	0	0	0	0	0	0	0	0	0	0	0	0	0	0	0	0	0	0	0	0
	1208	0	0	0	0	0	0	0	0	0	0	0	0	0	0	0	0	0	0	0	0
	1209	0	0	0	0	0	0	0	0	0	0	0	0	0	0	0	0	0	0	0	0
	1210	0	0	0	0	0	0	0	0	0	0	0	0	0	0	0	0	0	0	0	0
	1211	0	0	0	0	0	0	0	0	0	0	0	0	0	0	0	0	0	0	0	0
	1212	0	0	0	0	0	0	0	0	0	0	0	0	0	0	0	0	0	0	0	0
	1213	0	0	0	0	0	0	0	0	0	0	0	0	0	0	0	0	0	0	0	0										0	0	0	0	0	0	0	0	0	0	0	0	0	0	0	0	0	0	0
	1214	0	0	0	0	0	0	0	0	0	0	0	0	0	0	0	0	0	0	0	0										0	0	0	0	0	0	0	0	0	0	0	0	0	0	0	0	0	0	0
	1215	0	0	0	0	0	0	0	0	0	0	0	0	0	0	0	0	0	0	0	0										0	0	0	0	0	0	0	0	0	0	0	0	0	0	0	0	0	0	0
	1216	0	0	0	0	0	0	0	0	0	0	0	0	0	0	0	0	0	0	0	0										0	0	0	0	0	0	0	0	0	0	0	0	0	0	0	0	0	0	0
	1217	0	0	0	0	0	0	0	0	0	0	0	0	0	0	0	0	0	0	0	0										0	0	0	0	0	0	0	0	0	0	0	0	0	0	0	0	0	0	0
																															0	0	0	0	0	0	0	0	0	0	0	0	0	0	0	0	0	0	0
SUM	609	3246	3271	3246	3262	3286	3271	3246	3262	3246	3286	3286	3271	0	0	0	0	0	0	0	0									571915	45229	45128	44927	44840	44825	44624	44323	44300	44021	44270	44159	43868	0	0	0	0	0	0	0
CN X SUM OF ELEM.		42198	42523	42198	42406	42718	42523	42198	42406	42198	42718	42718	42523	0	0	0	0	0	0	0	0
		7	8	9	10	11	12	13	14	15	16	17	18	19	20	21	22	23	24	25	26
	SC	0.932985	0.942275	0.939257	0.945718	0.952995	0.952918	0.952056	0.957246	0.958588	0.964942	0.967368	0.96934	#DIV/0!	#DIV/0!	#DIV/0!	#DIV/0!	#DIV/0!	#DIV/0!	#DIV/0!	#DIV/0!
[truncated: 3 more columns]

## Sheet: D02 (Unaligned)
	OPTINALYSIS: SEQUENCE ANALYSIS THROUGH A LOOKING-GLASS
	CN = Central node; Kc = Kabirian coefficient of similarity; %Sim. = Percentage similarity; %Dsim. = Percentage dissimilarity																NUM. = Numeration; DEN. = Denumeration
				For Kc >1		For Kc <1
	RESULTS	CN	Kc	%Sim.	%Dsim.	%Sim.	%Dsim.										NUM	DEN		NUM	DEN
	D1	13	1.00248	0.990148	0.00985167	1.00995	-0.00994969										0.997519	1.00744		-1.00744	-0.997519
	D2	13	1.0144	0.944791	0.0552086	1.05843	-0.0584347										0.985602	1.0432		-1.0432	-0.985602
	D3	13	1.01099	0.957431	0.0425694	1.04446	-0.0444621										0.989007	1.03298		-1.03298	-0.989007
	D4	13	1.01933	0.926901	0.0730993	1.07886	-0.0788642										0.980665	1.058		-1.058	-0.980665
	D5	13	1.02856	0.894764	0.105236	1.11761	-0.117613										0.971437	1.08569		-1.08569	-0.971437
	D6	13	1.0289	0.893635	0.106365	1.11902	-0.119025										0.971104	1.08669		-1.08669	-0.971104
	D7	13	1.02846	0.89512	0.10488	1.11717	-0.117169										0.971541	1.08538		-1.08538	-0.971541
	D8	13	1.03509	0.873013	0.126987	1.14546	-0.145459										0.964911	1.10527		-1.10527	-0.964911
	D9	13	1.03742	0.865429	0.134571	1.1555	-0.155497										0.96258	1.11226		-1.11226	-0.96258
	D10	13	1.04492	0.841672	0.158328	1.18811	-0.188111										0.955085	1.13475		-1.13475	-0.955085
	D11	13	1.04825	0.831409	0.168591	1.20278	-0.202778										0.951751	1.14475		-1.14475	-0.951751
	D12	13	1.05144	0.821756	0.178244	1.21691	-0.216906										0.948563	1.15431		-1.15431	-0.948563
	X	13	#DIV/0!	#DIV/0!	#DIV/0!	#DIV/0!	#DIV/0!										#DIV/0!	#DIV/0!		#DIV/0!	#DIV/0!
	X	13	#DIV/0!	#DIV/0!	#DIV/0!	#DIV/0!	#DIV/0!										#DIV/0!	#DIV/0!		#DIV/0!	#DIV/0!
	X	13	#DIV/0!	#DIV/0!	#DIV/0!	#DIV/0!	#DIV/0!										#DIV/0!	#DIV/0!		#DIV/0!	#DIV/0!
	X	13	#DIV/0!	#DIV/0!	#DIV/0!	#DIV/0!	#DIV/0!										#DIV/0!	#DIV/0!		#DIV/0!	#DIV/0!
	X	13	#DIV/0!	#DIV/0!	#DIV/0!	#DIV/0!	#DIV/0!										#DIV/0!	#DIV/0!		#DIV/0!	#DIV/0!
	X	13	#DIV/0!	#DIV/0!	#DIV/0!	#DIV/0!	#DIV/0!										#DIV/0!	#DIV/0!		#DIV/0!	#DIV/0!
	X	13	#DIV/0!	#DIV/0!	#DIV/0!	#DIV/0!	#DIV/0!										#DIV/0!	#DIV/0!		#DIV/0!	#DIV/0!
	X	13	#DIV/0!	#DIV/0!	#DIV/0!	#DIV/0!	#DIV/0!										#DIV/0!	#DIV/0!		#DIV/0!	#DIV/0!
	SEQUENCES	INPUT SEQUENCE																												SEQUENCES	COMPUTATION AND CALCULATIONS
	QUANTITATIVE SCALE	D1	D2	D3	D4	D5	D6	D7	D8	D9	D10	D11	D12	X	X	X	X	X	X	X	X									QUANTITATIVE SCALE	D1	D2	D3	D4	D5	D6	D7	D8	D9	D10	D11	D12	X	X	X	X	X	X	X
	1	0	151	151	151	151	151	151	151	151	151	151	151	0	0	0	0	0	0	0	0									1	0	151	151	151	151	151	151	151	151	151	151	151	0	0	0	0	0	0	0
	2	126	0	126	126	126	126	126	126	126	126	126	126	0	0	0	0	0	0	0	0									2	252	0	252	252	252	252	252	252	252	252	252	252	0	0	0	0	0	0	0
	3	151	151	0	151	151	151	151	151	151	151	151	151	0	0	0	0	0	0	0	0									3	453	453	0	453	453	453	453	453	453	453	453	453	0	0	0	0	0	0	0
	4	135	135	135	0	135	135	135	135	135	135	135	135	0	0	0	0	0	0	0	0									4	540	540	540	0	540	540	540	540	540	540	540	540	0	0	0	0	0	0	0
	5	111	111	111	111	0	111	111	111	111	111	111	111	0	0	0	0	0	0	0	0									5	555	555	555	555	0	555	555	555	555	555	555	555	0	0	0	0	0	0	0
	6	126	126	126	126	126	0	126	126	126	126	126	126	0	0	0	0	0	0	0	0									6	756	756	756	756	756	0	756	756	756	756	756	756	0	0	0	0	0	0	0
	7	151	151	151	151	151	151	0	151	151	151	151	151	0	0	0	0	0	0	0	0									7	1057	1057	1057	1057	1057	1057	0	1057	1057	1057	1057	1057	0	0	0	0	0	0	0
	8	135	135	135	135	135	135	135	0	135	135	135	135	0	0	0	0	0	0	0	0									8	1080	1080	1080	1080	1080	1080	1080	0	1080	1080	1080	1080	0	0	0	0	0	0	0
	9	151	151	151	151	151	151	151	151	0	151	151	151	0	0	0	0	0	0	0	0									9	1359	1359	1359	1359	1359	1359	1359	1359	0	1359	1359	1359	0	0	0	0	0	0	0
	10	111	111	111	111	111	111	111	111	111	0	111	111	0	0	0	0	0	0	0	0									10	1110	1110	1110	1110	1110	1110	1110	1110	1110	0	1110	1110	0	0	0	0	0	0	0
	11	111	111	111	111	111	111	111	111	111	111	0	111	0	0	0	0	0	0	0	0									11	1221	1221	1221	1221	1221	1221	1221	1221	1221	1221	0	1221	0	0	0	0	0	0	0
	12	126	126	126	126	126	126	126	126	126	126	126	0	0	0	0	0	0	0	0	0									12	1512	1512	1512	1512	1512	1512	1512	1512	1512	1512	1512	0	0	0	0	0	0	0	0
	13	0	0	0	0	0	0	0	0	0	0	0	0	0	0	0	0	0	0	0	0									13	0	0	0	0	0	0	0	0	0	0	0	0	0	0	0	0	0	0	0
	14	111	111	111	111	111	111	111	111	111	111	111	111	0	0	0	0	0	0	0	0									14	1554	1554	1554	1554	1554	1554	1554	1554	1554	1554	1554	1554	0	0	0	0	0	0	0
	15	111	111	111	111	111	111	111	111	111	111	111	111	0	0	0	0	0	0	0	0									15	1665	1665	1665	1665	1665	1665	1665	1665	1665	1665	1665	1665	0	0	0	0	0	0	0
	16	111	111	111	111	111	111	111	111	111	111	111	111	0	0	0	0	0	0	0	0									16	1776	1776	1776	1776	1776	1776	1776	1776	1776	1776	1776	1776	0	0	0	0	0	0	0
	17	111	111	111	111	111	111	111	111	111	111	111	111	0	0	0	0	0	0	0	0									17	1887	1887	1887	1887	1887	1887	1887	1887	1887	1887	1887	1887	0	0	0	0	0	0	0
	18	111	111	111	111	111	111	111	111	111	111	111	111	0	0	0	0	0	0	0	0									18	1998	1998	1998	1998	1998	1998	1998	1998	1998	1998	1998	1998	0	0	0	0	0	0	0
	19	111	111	111	111	111	111	111	111	111	111	111	111	0	0	0	0	0	0	0	0									19	2109	2109	2109	2109	2109	2109	2109	2109	2109	2109	2109	2109	0	0	0	0	0	0	0
	20	111	111	111	111	111	111	111	111	111	111	111	111	0	0	0	0	0	0	0	0									20	2220	2220	2220	2220	2220	2220	2220	2220	2220	2220	2220	2220	0	0	0	0	0	0	0
	21	111	111	111	111	111	111	111	111	111	111	111	111	0	0	0	0	0	0	0	0									21	2331	2331	2331	2331	2331	2331	2331	2331	2331	2331	2331	2331	0	0	0	0	0	0	0
	22	111	111	111	111	111	111	111	111	111	111	111	111	0	0	0	0	0	0	0	0									22	2442	2442	2442	2442	2442	2442	2442	2442	2442	2442	2442	2442	0	0	0	0	0	0	0
	23	111	111	111	111	111	111	111	111	111	111	111	111	0	0	0	0	0	0	0	0									23	2553	2553	2553	2553	2553	2553	2553	2553	2553	2553	2553	2553	0	0	0	0	0	0	0
	24	111	111	111	111	111	111	111	111	111	111	111	111	0	0	0	0	0	0	0	0									24	2664	2664	2664	2664	2664	2664	2664	2664	2664	2664	2664	2664	0	0	0	0	0	0	0
	25	111	111	111	111	111	111	111	111	111	111	111	111	0	0	0	0	0	0	0	0									25	2775	2775	2775	2775	2775	2775	2775	2775	2775	2775	2775	2775	0	0	0	0	0	0	0
	26	0	0	0	0	0	0	0	0	0	0	0	0	0	0	0	0	0	0	0	0									26	0	0	0	0	0	0	0	0	0	0	0	0	0	0	0	0	0	0	0
	27	0	0	0	0	0	0	0	0	0	0	0	0	0	0	0	0	0	0	0	0									27	0	0	0	0	0	0	0	0	0	0	0	0	0	0	0	0	0	0	0
	28	0	0	0	0	0	0	0	0	0	0	0	0	0	0	0	0	0	0	0	0									28	0	0	0	0	0	0	0	0	0	0	0	0	0	0	0	0	0	0	0
	29	0	0	0	0	0	0	0	0	0	0	0	0	0	0	0	0	0	0	0	0									29	0	0	0	0	0	0	0	0	0	0	0	0	0	0	0	0	0	0	0
	30	0	0	0	0	0	0	0	0	0	0	0	0	0	0	0	0	0	0	0	0									30	0	0	0	0	0	0	0	0	0	0	0	0	0	0	0	0	0	0	0
	31	0	0	0	0	0	0	0	0	0	0	0	0	0	0	0	0	0	0	0	0									31	0	0	0	0	0	0	0	0	0	0	0	0	0	0	0	0	0	0	0
	32	0	0	0	0	0	0	0	0	0	0	0	0	0	0	0	0	0	0	0	0									32	0	0	0	0	0	0	0	0	0	0	0	0	0	0	0	0	0	0	0
	33	0	0	0	0	0	0	0	0	0	0	0	0	0	0	0	0	0	0	0	0									33	0	0	0	0	0	0	0	0	0	0	0	0	0	0	0	0	0	0	0
	34	0	0	0	0	0	0	0	0	0	0	0	0	0	0	0	0	0	0	0	0									34	0	0	0	0	0	0	0	0	0	0	0	0	0	0	0	0	0	0	0
	35	0	0	0	0	0	0	0	0	0	0	0	0	0	0	0	0	0	0	0	0									35	0	0	0	0	0	0	0	0	0	0	0	0	0	0	0	0	0	0	0
	36	0	0	0	0	0	0	0	0	0	0	0	0	0	0	0	0	0	0	0	0									36	0	0	0	0	0	0	0	0	0	0	0	0	0	0	0	0	0	0	0
	37	0	0	0	0	0	0	0	0	0	0	0	0	0	0	0	0	0	0	0	0									37	0	0	0	0	0	0	0	0	0	0	0	0	0	0	0	0	0	0	0
	38	0	0	0	0	0	0	0	0	0	0	0	0	0	0	0	0	0	0	0	0									38	0	0	0	0	0	0	0	0	0	0	0	0	0	0	0	0	0	0	0
	39	0	0	0	0	0	0	0	0	0	0	0	0	0	0	0	0	0	0	0	0									39	0	0	0	0	0	0	0	0	0	0	0	0	0	0	0	0	0	0	0
	40	0	0	0	0	0	0	0	0	0	0	0	0	0	0	0	0	0	0	0	0									40	0	0	0	0	0	0	0	0	0	0	0	0	0	0	0	0	0	0	0
	41	0	0	0	0	0	0	0	0	0	0	0	0	0	0	0	0	0	0	0	0									41	0	0	0	0	0	0	0	0	0	0	0	0	0	0	0	0	0	0	0
	42	0	0	0	0	0	0	0	0	0	0	0	0	0	0	0	0	0	0	0	0									42	0	0	0	0	0	0	0	0	0	0	0	0	0	0	0	0	0	0	0
	43	0	0	0	0	0	0	0	0	0	0	0	0	0	0	0	0	0	0	0	0									43	0	0	0	0	0	0	0	0	0	0	0	0	0	0	0	0	0	0	0
	44	0	0	0	0	0	0	0	0	0	0	0	0	0	0	0	0	0	0	0	0									44	0	0	0	0	0	0	0	0	0	0	0	0	0	0	0	0	0	0	0
	45	0	0	0	0	0	0	0	0	0	0	0	0	0	0	0	0	0	0	0	0									45	0	0	0	0	0	0	0	0	0	0	0	0	0	0	0	0	0	0	0
	46	0	0	0	0	0	0	0	0	0	0	0	0	0	0	0	0	0	0	0	0									46	0	0	0	0	0	0	0	0	0	0	0	0	0	0	0	0	0	0	0
	47	0	0	0	0	0	0	0	0	0	0	0	0	0	0	0	0	0	0	0	0									47	0	0	0	0	0	0	0	0	0	0	0	0	0	0	0	0	0	0	0
	48	0	0	0	0	0	0	0	0	0	0	0	0	0	0	0	0	0	0	0	0									48	0	0	0	0	0	0	0	0	0	0	0	0	0	0	0	0	0	0	0
	49	0	0	0	0	0	0	0	0	0	0	0	0	0	0	0	0	0	0	0	0									49	0	0	0	0	0	0	0	0	0	0	0	0	0	0	0	0	0	0	0
	50	0	0	0	0	0	0	0	0	0	0	0	0	0	0	0	0	0	0	0	0									50	0	0	0	0	0	0	0	0	0	0	0	0	0	0	0	0	0	0	0
	51	0	0	0	0	0	0	0	0	0	0	0	0	0	0	0	0	0	0	0	0									51	0	0	0	0	0	0	0	0	0	0	0	0	0	0	0	0	0	0	0
	52	0	0	0	0	0	0	0	0	0	0	0	0	0	0	0	0	0	0	0	0									52	0	0	0	0	0	0	0	0	0	0	0	0	0	0	0	0	0	0	0
	53	0	0	0	0	0	0	0	0	0	0	0	0	0	0	0	0	0	0	0	0									53	0	0	0	0	0	0	0	0	0	0	0	0	0	0	0	0	0	0	0
	54	0	0	0	0	0	0	0	0	0	0	0	0	0	0	0	0	0	0	0	0									54	0	0	0	0	0	0	0	0	0	0	0	0	0	0	0	0	0	0	0
	55	0	0	0	0	0	0	0	0	0	0	0	0	0	0	0	0	0	0	0	0									55	0	0	0	0	0	0	0	0	0	0	0	0	0	0	0	0	0	0	0
	56	0	0	0	0	0	0	0	0	0	0	0	0	0	0	0	0	0	0	0	0									56	0	0	0	0	0	0	0	0	0	0	0	0	0	0	0	0	0	0	0
	57	0	0	0	0	0	0	0	0	0	0	0	0	0	0	0	0	0	0	0	0									57	0	0	0	0	0	0	0	0	0	0	0	0	0	0	0	0	0	0	0
	58	0	0	0	0	0	0	0	0	0	0	0	0	0	0	0	0	0	0	0	0									58	0	0	0	0	0	0	0	0	0	0	0	0	0	0	0	0	0	0	0
	59	0	0	0	0	0	0	0	0	0	0	0	0	0	0	0	0	0	0	0	0									59	0	0	0	0	0	0	0	0	0	0	0	0	0	0	0	0	0	0	0
	60	0	0	0	0	0	0	0	0	0	0	0	0	0	0	0	0	0	0	0	0									60	0	0	0	0	0	0	0	0	0	0	0	0	0	0	0	0	0	0	0
	61	0	0	0	0	0	0	0	0	0	0	0	0	0	0	0	0	0	0	0	0									61	0	0	0	0	0	0	0	0	0	0	0	0	0	0	0	0	0	0	0
	62	0	0	0	0	0	0	0	0	0	0	0	0	0	0	0	0	0	0	0	0									62	0	0	0	0	0	0	0	0	0	0	0	0	0	0	0	0	0	0	0
	63	0	0	0	0	0	0	0	0	0	0	0	0	0	0	0	0	0	0	0	0									63	0	0	0	0	0	0	0	0	0	0	0	0	0	0	0	0	0	0	0
	64	0	0	0	0	0	0	0	0	0	0	0	0	0	0	0	0	0	0	0	0									64	0	0	0	0	0	0	0	0	0	0	0	0	0	0	0	0	0	0	0
	65	0	0	0	0	0	0	0	0	0	0	0	0	0	0	0	0	0	0	0	0									65	0	0	0	0	0	0	0	0	0	0	0	0	0	0	0	0	0	0	0
	66	0	0	0	0	0	0	0	0	0	0	0	0	0	0	0	0	0	0	0	0									66	0	0	0	0	0	0	0	0	0	0	0	0	0	0	0	0	0	0	0
	67	0	0	0	0	0	0	0	0	0	0	0	0	0	0	0	0	0	0	0	0									67	0	0	0	0	0	0	0	0	0	0	0	0	0	0	0	0	0	0	0
	68	0	0	0	0	0	0	0	0	0	0	0	0	0	0	0	0	0	0	0	0									68	0	0	0	0	0	0	0	0	0	0	0	0	0	0	0	0	0	0	0
	69	0	0	0	0	0	0	0	0	0	0	0	0	0	0	0	0	0	0	0	0									69	0	0	0	0	0	0	0	0	0	0	0	0	0	0	0	0	0	0	0
	70	0	0	0	0	0	0	0	0	0	0	0	0	0	0	0	0	0	0	0	0									70	0	0	0	0	0	0	0	0	0	0	0	0	0	0	0	0	0	0	0
	71	0	0	0	0	0	0	0	0	0	0	0	0	0	0	0	0	0	0	0	0									71	0	0	0	0	0	0	0	0	0	0	0	0	0	0	0	0	0	0	0
	72	0	0	0	0	0	0	0	0	0	0	0	0	0	0	0	0	0	0	0	0									72	0	0	0	0	0	0	0	0	0	0	0	0	0	0	0	0	0	0	0
	73	0	0	0	0	0	0	0	0	0	0	0	0	0	0	0	0	0	0	0	0									73	0	0	0	0	0	0	0	0	0	0	0	0	0	0	0	0	0	0	0
	74	0	0	0	0	0	0	0	0	0	0	0	0	0	0	0	0	0	0	0	0									74	0	0	0	0	0	0	0	0	0	0	0	0	0	0	0	0	0	0	0
	75	0	0	0	0	0	0	0	0	0	0	0	0	0	0	0	0	0	0	0	0									75	0	0	0	0	0	0	0	0	0	0	0	0	0	0	0	0	0	0	0
	76	0	0	0	0	0	0	0	0	0	0	0	0	0	0	0	0	0	0	0	0									76	0	0	0	0	0	0	0	0	0	0	0	0	0	0	0	0	0	0	0
	77	0	0	0	0	0	0	0	0	0	0	0	0	0	0	0	0	0	0	0	0									77	0	0	0	0	0	0	0	0	0	0	0	0	0	0	0	0	0	0	0
	78	0	0	0	0	0	0	0	0	0	0	0	0	0	0	0	0	0	0	0	0									78	0	0	0	0	0	0	0	0	0	0	0	0	0	0	0	0	0	0	0
	79	0	0	0	0	0	0	0	0	0	0	0	0	0	0	0	0	0	0	0	0									79	0	0	0	0	0	0	0	0	0	0	0	0	0	0	0	0	0	0	0
	80	0	0	0	0	0	0	0	0	0	0	0	0	0	0	0	0	0	0	0	0									80	0	0	0	0	0	0	0	0	0	0	0	0	0	0	0	0	0	0	0
	81	0	0	0	0	0	0	0	0	0	0	0	0	0	0	0	0	0	0	0	0									81	0	0	0	0	0	0	0	0	0	0	0	0	0	0	0	0	0	0	0
	82	0	0	0	0	0	0	0	0	0	0	0	0	0	0	0	0	0	0	0	0									82	0	0	0	0	0	0	0	0	0	0	0	0	0	0	0	0	0	0	0
	83	0	0	0	0	0	0	0	0	0	0	0	0	0	0	0	0	0	0	0	0									83	0	0	0	0	0	0	0	0	0	0	0	0	0	0	0	0	0	0	0
	84	0	0	0	0	0	0	0	0	0	0	0	0	0	0	0	0	0	0	0	0									84	0	0	0	0	0	0	0	0	0	0	0	0	0	0	0	0	0	0	0
	85	0	0	0	0	0	0	0	0	0	0	0	0	0	0	0	0	0	0	0	0									85	0	0	0	0	0	0	0	0	0	0	0	0	0	0	0	0	0	0	0
	86	0	0	0	0	0	0	0	0	0	0	0	0	0	0	0	0	0	0	0	0									86	0	0	0	0	0	0	0	0	0	0	0	0	0	0	0	0	0	0	0
	87	0	0	0	0	0	0	0	0	0	0	0	0	0	0	0	0	0	0	0	0									87	0	0	0	0	0	0	0	0	0	0	0	0	0	0	0	0	0	0	0
	88	0	0	0	0	0	0	0	0	0	0	0	0	0	0	0	0	0	0	0	0									88	0	0	0	0	0	0	0	0	0	0	0	0	0	0	0	0	0	0	0
	89	0	0	0	0	0	0	0	0	0	0	0	0	0	0	0	0	0	0	0	0									89	0	0	0	0	0	0	0	0	0	0	0	0	0	0	0	0	0	0	0
	90	0	0	0	0	0	0	0	0	0	0	0	0	0	0	0	0	0	0	0	0									90	0	0	0	0	0	0	0	0	0	0	0	0	0	0	0	0	0	0	0
	91	0	0	0	0	0	0	0	0	0	0	0	0	0	0	0	0	0	0	0	0									91	0	0	0	0	0	0	0	0	0	0	0	0	0	0	0	0	0	0	0
	92	0	0	0	0	0	0	0	0	0	0	0	0	0	0	0	0	0	0	0	0									92	0	0	0	0	0	0	0	0	0	0	0	0	0	0	0	0	0	0	0
	93	0	0	0	0	0	0	0	0	0	0	0	0	0	0	0	0	0	0	0	0									93	0	0	0	0	0	0	0	0	0	0	0	0	0	0	0	0	0	0	0
	94	0	0	0	0	0	0	0	0	0	0	0	0	0	0	0	0	0	0	0	0									94	0	0	0	0	0	0	0	0	0	0	0	0	0	0	0	0	0	0	0
	95	0	0	0	0	0	0	0	0	0	0	0	0	0	0	0	0	0	0	0	0									95	0	0	0	0	0	0	0	0	0	0	0	0	0	0	0	0	0	0	0
	96	0	0	0	0	0	0	0	0	0	0	0	0	0	0	0	0	0	0	0	0									96	0	0	0	0	0	0	0	0	0	0	0	0	0	0	0	0	0	0	0
	97	0	0	0	0	0	0	0	0	0	0	0	0	0	0	0	0	0	0	0	0									97	0	0	0	0	0	0	0	0	0	0	0	0	0	0	0	0	0	0	0
	98	0	0	0	0	0	0	0	0	0	0	0	0	0	0	0	0	0	0	0	0									98	0	0	0	0	0	0	0	0	0	0	0	0	0	0	0	0	0	0	0
	99	0	0	0	0	0	0	0	0	0	0	0	0	0	0	0	0	0	0	0	0									99	0	0	0	0	0	0	0	0	0	0	0	0	0	0	0	0	0	0	0
	100	0	0	0	0	0	0	0	0	0	0	0	0	0	0	0	0	0	0	0	0									100	0	0	0	0	0	0	0	0	0	0	0	0	0	0	0	0	0	0	0
	101	0	0	0	0	0	0	0	0	0	0	0	0	0	0	0	0	0	0	0	0									101	0	0	0	0	0	0	0	0	0	0	0	0	0	0	0	0	0	0	0
	102	0	0	0	0	0	0	0	0	0	0	0	0	0	0	0	0	0	0	0	0									102	0	0	0	0	0	0	0	0	0	0	0	0	0	0	0	0	0	0	0
	103	0	0	0	0	0	0	0	0	0	0	0	0	0	0	0	0	0	0	0	0									103	0	0	0	0	0	0	0	0	0	0	0	0	0	0	0	0	0	0	0
	104	0	0	0	0	0	0	0	0	0	0	0	0	0	0	0	0	0	0	0	0									104	0	0	0	0	0	0	0	0	0	0	0	0	0	0	0	0	0	0	0
	105	0	0	0	0	0	0	0	0	0	0	0	0	0	0	0	0	0	0	0	0									105	0	0	0	0	0	0	0	0	0	0	0	0	0	0	0	0	0	0	0
	106	0	0	0	0	0	0	0	0	0	0	0	0	0	0	0	0	0	0	0	0									106	0	0	0	0	0	0	0	0	0	0	0	0	0	0	0	0	0	0	0
	107	0	0	0	0	0	0	0	0	0	0	0	0	0	0	0	0	0	0	0	0									107	0	0	0	0	0	0	0	0	0	0	0	0	0	0	0	0	0	0	0
	108	0	0	0	0	0	0	0	0	0	0	0	0	0	0	0	0	0	0	0	0									108	0	0	0	0	0	0	0	0	0	0	0	0	0	0	0	0	0	0	0
	109	0	0	0	0	0	0	0	0	0	0	0	0	0	0	0	0	0	0	0	0									109	0	0	0	0	0	0	0	0	0	0	0	0	0	0	0	0	0	0	0
	110	0	0	0	0	0	0	0	0	0	0	0	0	0	0	0	0	0	0	0	0									110	0	0	0	0	0	0	0	0	0	0	0	0	0	0	0	0	0	0	0
	111	0	0	0	0	0	0	0	0	0	0	0	0	0	0	0	0	0	0	0	0									111	0	0	0	0	0	0	0	0	0	0	0	0	0	0	0	0	0	0	0
	112	0	0	0	0	0	0	0	0	0	0	0	0	0	0	0	0	0	0	0	0									112	0	0	0	0	0	0	0	0	0	0	0	0	0	0	0	0	0	0	0
	113	0	0	0	0	0	0	0	0	0	0	0	0	0	0	0	0	0	0	0	0									113	0	0	0	0	0	0	0	0	0	0	0	0	0	0	0	0	0	0	0
	114	0	0	0	0	0	0	0	0	0	0	0	0	0	0	0	0	0	0	0	0									114	0	0	0	0	0	0	0	0	0	0	0	0	0	0	0	0	0	0	0
	115	0	0	0	0	0	0	0	0	0	0	0	0	0	0	0	0	0	0	0	0									115	0	0	0	0	0	0	0	0	0	0	0	0	0	0	0	0	0	0	0
	116	0	0	0	0	0	0	0	0	0	0	0	0	0	0	0	0	0	0	0	0									116	0	0	0	0	0	0	0	0	0	0	0	0	0	0	0	0	0	0	0
	117	0	0	0	0	0	0	0	0	0	0	0	0	0	0	0	0	0	0	0	0									117	0	0	0	0	0	0	0	0	0	0	0	0	0	0	0	0	0	0	0
	118	0	0	0	0	0	0	0	0	0	0	0	0	0	0	0	0	0	0	0	0									118	0	0	0	0	0	0	0	0	0	0	0	0	0	0	0	0	0	0	0
	119	0	0	0	0	0	0	0	0	0	0	0	0	0	0	0	0	0	0	0	0									119	0	0	0	0	0	0	0	0	0	0	0	0	0	0	0	0	0	0	0
	120	0	0	0	0	0	0	0	0	0	0	0	0	0	0	0	0	0	0	0	0									120	0	0	0	0	0	0	0	0	0	0	0	0	0	0	0	0	0	0	0
	121	0	0	0	0	0	0	0	0	0	0	0	0	0	0	0	0	0	0	0	0									121	0	0	0	0	0	0	0	0	0	0	0	0	0	0	0	0	0	0	0
	122	0	0	0	0	0	0	0	0	0	0	0	0	0	0	0	0	0	0	0	0									122	0	0	0	0	0	0	0	0	0	0	0	0	0	0	0	0	0	0	0
	123	0	0	0	0	0	0	0	0	0	0	0	0	0	0	0	0	0	0	0	0									123	0	0	0	0	0	0	0	0	0	0	0	0	0	0	0	0	0	0	0
	124	0	0	0	0	0	0	0	0	0	0	0	0	0	0	0	0	0	0	0	0									124	0	0	0	0	0	0	0	0	0	0	0	0	0	0	0	0	0	0	0
	125	0	0	0	0	0	0	0	0	0	0	0	0	0	0	0	0	0	0	0	0									125	0	0	0	0	0	0	0	0	0	0	0	0	0	0	0	0	0	0	0
	126	0	0	0	0	0	0	0	0	0	0	0	0	0	0	0	0	0	0	0	0									126	0	0	0	0	0	0	0	0	0	0	0	0	0	0	0	0	0	0	0
	127	0	0	0	0	0	0	0	0	0	0	0	0	0	0	0	0	0	0	0	0									127	0	0	0	0	0	0	0	0	0	0	0	0	0	0	0	0	0	0	0
	128	0	0	0	0	0	0	0	0	0	0	0	0	0	0	0	0	0	0	0	0									128	0	0	0	0	0	0	0	0	0	0	0	0	0	0	0	0	0	0	0
	129	0	0	0	0	0	0	0	0	0	0	0	0	0	0	0	0	0	0	0	0									129	0	0	0	0	0	0	0	0	0	0	0	0	0	0	0	0	0	0	0
	130	0	0	0	0	0	0	0	0	0	0	0	0	0	0	0	0	0	0	0	0									130	0	0	0	0	0	0	0	0	0	0	0	0	0	0	0	0	0	0	0
	131	0	0	0	0	0	0	0	0	0	0	0	0	0	0	0	0	0	0	0	0									131	0	0	0	0	0	0	0	0	0	0	0	0	0	0	0	0	0	0	0
	132	0	0	0	0	0	0	0	0	0	0	0	0	0	0	0	0	0	0	0	0									132	0	0	0	0	0	0	0	0	0	0	0	0	0	0	0	0	0	0	0
	133	0	0	0	0	0	0	0	0	0	0	0	0	0	0	0	0	0	0	0	0									133	0	0	0	0	0	0	0	0	0	0	0	0	0	0	0	0	0	0	0
	134	0	0	0	0	0	0	0	0	0	0	0	0	0	0	0	0	0	0	0	0									134	0	0	0	0	0	0	0	0	0	0	0	0	0	0	0	0	0	0	0
	135	0	0	0	0	0	0	0	0	0	0	0	0	0	0	0	0	0	0	0	0									135	0	0	0	0	0	0	0	0	0	0	0	0	0	0	0	0	0	0	0
	136	0	0	0	0	0	0	0	0	0	0	0	0	0	0	0	0	0	0	0	0									136	0	0	0	0	0	0	0	0	0	0	0	0	0	0	0	0	0	0	0
	137	0	0	0	0	0	0	0	0	0	0	0	0	0	0	0	0	0	0	0	0									137	0	0	0	0	0	0	0	0	0	0	0	0	0	0	0	0	0	0	0
	138	0	0	0	0	0	0	0	0	0	0	0	0	0	0	0	0	0	0	0	0									138	0	0	0	0	0	0	0	0	0	0	0	0	0	0	0	0	0	0	0
	139	0	0	0	0	0	0	0	0	0	0	0	0	0	0	0	0	0	0	0	0									139	0	0	0	0	0	0	0	0	0	0	0	0	0	0	0	0	0	0	0
	140	0	0	0	0	0	0	0	0	0	0	0	0	0	0	0	0	0	0	0	0									140	0	0	0	0	0	0	0	0	0	0	0	0	0	0	0	0	0	0	0
	141	0	0	0	0	0	0	0	0	0	0	0	0	0	0	0	0	0	0	0	0									141	0	0	0	0	0	0	0	0	0	0	0	0	0	0	0	0	0	0	0
	142	0	0	0	0	0	0	0	0	0	0	0	0	0	0	0	0	0	0	0	0									142	0	0	0	0	0	0	0	0	0	0	0	0	0	0	0	0	0	0	0
	143	0	0	0	0	0	0	0	0	0	0	0	0	0	0	0	0	0	0	0	0									143	0	0	0	0	0	0	0	0	0	0	0	0	0	0	0	0	0	0	0
	144	0	0	0	0	0	0	0	0	0	0	0	0	0	0	0	0	0	0	0	0									144	0	0	0	0	0	0	0	0	0	0	0	0	0	0	0	0	0	0	0
	145	0	0	0	0	0	0	0	0	0	0	0	0	0	0	0	0	0	0	0	0									145	0	0	0	0	0	0	0	0	0	0	0	0	0	0	0	0	0	0	0
	146	0	0	0	0	0	0	0	0	0	0	0	0	0	0	0	0	0	0	0	0									146	0	0	0	0	0	0	0	0	0	0	0	0	0	0	0	0	0	0	0
	147	0	0	0	0	0	0	0	0	0	0	0	0	0	0	0	0	0	0	0	0									147	0	0	0	0	0	0	0	0	0	0	0	0	0	0	0	0	0	0	0
	148	0	0	0	0	0	0	0	0	0	0	0	0	0	0	0	0	0	0	0	0									148	0	0	0	0	0	0	0	0	0	0	0	0	0	0	0	0	0	0	0
	149	0	0	0	0	0	0	0	0	0	0	0	0	0	0	0	0	0	0	0	0									149	0	0	0	0	0	0	0	0	0	0	0	0	0	0	0	0	0	0	0
	150	0	0	0	0	0	0	0	0	0	0	0	0	0	0	0	0	0	0	0	0									150	0	0	0	0	0	0	0	0	0	0	0	0	0	0	0	0	0	0	0
	151	0	0	0	0	0	0	0	0	0	0	0	0	0	0	0	0	0	0	0	0									151	0	0	0	0	0	0	0	0	0	0	0	0	0	0	0	0	0	0	0
	152	0	0	0	0	0	0	0	0	0	0	0	0	0	0	0	0	0	0	0	0									152	0	0	0	0	0	0	0	0	0	0	0	0	0	0	0	0	0	0	0
	153	0	0	0	0	0	0	0	0	0	0	0	0	0	0	0	0	0	0	0	0									153	0	0	0	0	0	0	0	0	0	0	0	0	0	0	0	0	0	0	0
	154	0	0	0	0	0	0	0	0	0	0	0	0	0	0	0	0	0	0	0	0									154	0	0	0	0	0	0	0	0	0	0	0	0	0	0	0	0	0	0	0
	155	0	0	0	0	0	0	0	0	0	0	0	0	0	0	0	0	0	0	0	0									155	0	0	0	0	0	0	0	0	0	0	0	0	0	0	0	0	0	0	0
	156	0	0	0	0	0	0	0	0	0	0	0	0	0	0	0	0	0	0	0	0									156	0	0	0	0	0	0	0	0	0	0	0	0	0	0	0	0	0	0	0
	157	0	0	0	0	0	0	0	0	0	0	0	0	0	0	0	0	0	0	0	0									157	0	0	0	0	0	0	0	0	0	0	0	0	0	0	0	0	0	0	0
	158	0	0	0	0	0	0	0	0	0	0	0	0	0	0	0	0	0	0	0	0									158	0	0	0	0	0	0	0	0	0	0	0	0	0	0	0	0	0	0	0
	159	0	0	0	0	0	0	0	0	0	0	0	0	0	0	0	0	0	0	0	0									159	0	0	0	0	0	0	0	0	0	0	0	0	0	0	0	0	0	0	0
	160	0	0	0	0	0	0	0	0	0	0	0	0	0	0	0	0	0	0	0	0									160	0	0	0	0	0	0	0	0	0	0	0	0	0	0	0	0	0	0	0
	161	0	0	0	0	0	0	0	0	0	0	0	0	0	0	0	0	0	0	0	0									161	0	0	0	0	0	0	0	0	0	0	0	0	0	0	0	0	0	0	0
	162	0	0	0	0	0	0	0	0	0	0	0	0	0	0	0	0	0	0	0	0									162	0	0	0	0	0	0	0	0	0	0	0	0	0	0	0	0	0	0	0
	163	0	0	0	0	0	0	0	0	0	0	0	0	0	0	0	0	0	0	0	0									163	0	0	0	0	0	0	0	0	0	0	0	0	0	0	0	0	0	0	0
	164	0	0	0	0	0	0	0	0	0	0	0	0	0	0	0	0	0	0	0	0									164	0	0	0	0	0	0	0	0	0	0	0	0	0	0	0	0	0	0	0
	165	0	0	0	0	0	0	0	0	0	0	0	0	0	0	0	0	0	0	0	0									165	0	0	0	0	0	0	0	0	0	0	0	0	0	0	0	0	0	0	0
	166	0	0	0	0	0	0	0	0	0	0	0	0	0	0	0	0	0	0	0	0									166	0	0	0	0	0	0	0	0	0	0	0	0	0	0	0	0	0	0	0
	167	0	0	0	0	0	0	0	0	0	0	0	0	0	0	0	0	0	0	0	0									167	0	0	0	0	0	0	0	0	0	0	0	0	0	0	0	0	0	0	0
	168	0	0	0	0	0	0	0	0	0	0	0	0	0	0	0	0	0	0	0	0									168	0	0	0	0	0	0	0	0	0	0	0	0	0	0	0	0	0	0	0
	169	0	0	0	0	0	0	0	0	0	0	0	0	0	0	0	0	0	0	0	0									169	0	0	0	0	0	0	0	0	0	0	0	0	0	0	0	0	0	0	0
	170	0	0	0	0	0	0	0	0	0	0	0	0	0	0	0	0	0	0	0	0									170	0	0	0	0	0	0	0	0	0	0	0	0	0	0	0	0	0	0	0
	171	0	0	0	0	0	0	0	0	0	0	0	0	0	0	0	0	0	0	0	0									171	0	0	0	0	0	0	0	0	0	0	0	0	0	0	0	0	0	0	0
	172	0	0	0	0	0	0	0	0	0	0	0	0	0	0	0	0	0	0	0	0									172	0	0	0	0	0	0	0	0	0	0	0	0	0	0	0	0	0	0	0
	173	0	0	0	0	0	0	0	0	0	0	0	0	0	0	0	0	0	0	0	0									173	0	0	0	0	0	0	0	0	0	0	0	0	0	0	0	0	0	0	0
	174	0	0	0	0	0	0	0	0	0	0	0	0	0	0	0	0	0	0	0	0									174	0	0	0	0	0	0	0	0	0	0	0	0	0	0	0	0	0	0	0
	175	0	0	0	0	0	0	0	0	0	0	0	0	0	0	0	0	0	0	0	0									175	0	0	0	0	0	0	0	0	0	0	0	0	0	0	0	0	0	0	0
	176	0	0	0	0	0	0	0	0	0	0	0	0	0	0	0	0	0	0	0	0									176	0	0	0	0	0	0	0	0	0	0	0	0	0	0	0	0	0	0	0
	177	0	0	0	0	0	0	0	0	0	0	0	0	0	0	0	0	0	0	0	0									177	0	0	0	0	0	0	0	0	0	0	0	0	0	0	0	0	0	0	0
	178	0	0	0	0	0	0	0	0	0	0	0	0	0	0	0	0	0	0	0	0									178	0	0	0	0	0	0	0	0	0	0	0	0	0	0	0	0	0	0	0
	179	0	0	0	0	0	0	0	0	0	0	0	0	0	0	0	0	0	0	0	0									179	0	0	0	0	0	0	0	0	0	0	0	0	0	0	0	0	0	0	0
	180	0	0	0	0	0	0	0	0	0	0	0	0	0	0	0	0	0	0	0	0									180	0	0	0	0	0	0	0	0	0	0	0	0	0	0	0	0	0	0	0
	181	0	0	0	0	0	0	0	0	0	0	0	0	0	0	0	0	0	0	0	0									181	0	0	0	0	0	0	0	0	0	0	0	0	0	0	0	0	0	0	0
	182	0	0	0	0	0	0	0	0	0	0	0	0	0	0	0	0	0	0	0	0									182	0	0	0	0	0	0	0	0	0	0	0	0	0	0	0	0	0	0	0
	183	0	0	0	0	0	0	0	0	0	0	0	0	0	0	0	0	0	0	0	0									183	0	0	0	0	0	0	0	0	0	0	0	0	0	0	0	0	0	0	0
	184	0	0	0	0	0	0	0	0	0	0	0	0	0	0	0	0	0	0	0	0									184	0	0	0	0	0	0	0	0	0	0	0	0	0	0	0	0	0	0	0
	185	0	0	0	0	0	0	0	0	0	0	0	0	0	0	0	0	0	0	0	0									185	0	0	0	0	0	0	0	0	0	0	0	0	0	0	0	0	0	0	0
	186	0	0	0	0	0	0	0	0	0	0	0	0	0	0	0	0	0	0	0	0									186	0	0	0	0	0	0	0	0	0	0	0	0	0	0	0	0	0	0	0
	187	0	0	0	0	0	0	0	0	0	0	0	0	0	0	0	0	0	0	0	0									187	0	0	0	0	0	0	0	0	0	0	0	0	0	0	0	0	0	0	0
	188	0	0	0	0	0	0	0	0	0	0	0	0	0	0	0	0	0	0	0	0									188	0	0	0	0	0	0	0	0	0	0	0	0	0	0	0	0	0	0	0
	189	0	0	0	0	0	0	0	0	0	0	0	0	0	0	0	0	0	0	0	0									189	0	0	0	0	0	0	0	0	0	0	0	0	0	0	0	0	0	0	0
	190	0	0	0	0	0	0	0	0	0	0	0	0	0	0	0	0	0	0	0	0									190	0	0	0	0	0	0	0	0	0	0	0	0	0	0	0	0	0	0	0
	191	0	0	0	0	0	0	0	0	0	0	0	0	0	0	0	0	0	0	0	0									191	0	0	0	0	0	0	0	0	0	0	0	0	0	0	0	0	0	0	0
	192	0	0	0	0	0	0	0	0	0	0	0	0	0	0	0	0	0	0	0	0									192	0	0	0	0	0	0	0	0	0	0	0	0	0	0	0	0	0	0	0
	193	0	0	0	0	0	0	0	0	0	0	0	0	0	0	0	0	0	0	0	0									193	0	0	0	0	0	0	0	0	0	0	0	0	0	0	0	0	0	0	0
	194	0	0	0	0	0	0	0	0	0	0	0	0	0	0	0	0	0	0	0	0									194	0	0	0	0	0	0	0	0	0	0	0	0	0	0	0	0	0	0	0
	195	0	0	0	0	0	0	0	0	0	0	0	0	0	0	0	0	0	0	0	0									195	0	0	0	0	0	0	0	0	0	0	0	0	0	0	0	0	0	0	0
	196	0	0	0	0	0	0	0	0	0	0	0	0	0	0	0	0	0	0	0	0									196	0	0	0	0	0	0	0	0	0	0	0	0	0	0	0	0	0	0	0
	197	0	0	0	0	0	0	0	0	0	0	0	0	0	0	0	0	0	0	0	0									197	0	0	0	0	0	0	0	0	0	0	0	0	0	0	0	0	0	0	0
	198	0	0	0	0	0	0	0	0	0	0	0	0	0	0	0	0	0	0	0	0									198	0	0	0	0	0	0	0	0	0	0	0	0	0	0	0	0	0	0	0
	199	0	0	0	0	0	0	0	0	0	0	0	0	0	0	0	0	0	0	0	0									199	0	0	0	0	0	0	0	0	0	0	0	0	0	0	0	0	0	0	0
	200	0	0	0	0	0	0	0	0	0	0	0	0	0	0	0	0	0	0	0	0									200	0	0	0	0	0	0	0	0	0	0	0	0	0	0	0	0	0	0	0
	201	0	0	0	0	0	0	0	0	0	0	0	0	0	0	0	0	0	0	0	0									201	0	0	0	0	0	0	0	0	0	0	0	0	0	0	0	0	0	0	0
	202	0	0	0	0	0	0	0	0	0	0	0	0	0	0	0	0	0	0	0	0									202	0	0	0	0	0	0	0	0	0	0	0	0	0	0	0	0	0	0	0
	203	0	0	0	0	0	0	0	0	0	0	0	0	0	0	0	0	0	0	0	0									203	0	0	0	0	0	0	0	0	0	0	0	0	0	0	0	0	0	0	0
	204	0	0	0	0	0	0	0	0	0	0	0	0	0	0	0	0	0	0	0	0									204	0	0	0	0	0	0	0	0	0	0	0	0	0	0	0	0	0	0	0
	205	0	0	0	0	0	0	0	0	0	0	0	0	0	0	0	0	0	0	0	0									205	0	0	0	0	0	0	0	0	0	0	0	0	0	0	0	0	0	0	0
	206	0	0	0	0	0	0	0	0	0	0	0	0	0	0	0	0	0	0	0	0									206	0	0	0	0	0	0	0	0	0	0	0	0	0	0	0	0	0	0	0
	207	0	0	0	0	0	0	0	0	0	0	0	0	0	0	0	0	0	0	0	0									207	0	0	0	0	0	0	0	0	0	0	0	0	0	0	0	0	0	0	0
	208	0	0	0	0	0	0	0	0	0	0	0	0	0	0	0	0	0	0	0	0									208	0	0	0	0	0	0	0	0	0	0	0	0	0	0	0	0	0	0	0
	209	0	0	0	0	0	0	0	0	0	0	0	0	0	0	0	0	0	0	0	0									209	0	0	0	0	0	0	0	0	0	0	0	0	0	0	0	0	0	0	0
	210	0	0	0	0	0	0	0	0	0	0	0	0	0	0	0	0	0	0	0	0									210	0	0	0	0	0	0	0	0	0	0	0	0	0	0	0	0	0	0	0
	211	0	0	0	0	0	0	0	0	0	0	0	0	0	0	0	0	0	0	0	0									211	0	0	0	0	0	0	0	0	0	0	0	0	0	0	0	0	0	0	0
	212	0	0	0	0	0	0	0	0	0	0	0	0	0	0	0	0	0	0	0	0									212	0	0	0	0	0	0	0	0	0	0	0	0	0	0	0	0	0	0	0
	213	0	0	0	0	0	0	0	0	0	0	0	0	0	0	0	0	0	0	0	0									213	0	0	0	0	0	0	0	0	0	0	0	0	0	0	0	0	0	0	0
	214	0	0	0	0	0	0	0	0	0	0	0	0	0	0	0	0	0	0	0	0									214	0	0	0	0	0	0	0	0	0	0	0	0	0	0	0	0	0	0	0
	215	0	0	0	0	0	0	0	0	0	0	0	0	0	0	0	0	0	0	0	0									215	0	0	0	0	0	0	0	0	0	0	0	0	0	0	0	0	0	0	0
	216	0	0	0	0	0	0	0	0	0	0	0	0	0	0	0	0	0	0	0	0									216	0	0	0	0	0	0	0	0	0	0	0	0	0	0	0	0	0	0	0
	217	0	0	0	0	0	0	0	0	0	0	0	0	0	0	0	0	0	0	0	0									217	0	0	0	0	0	0	0	0	0	0	0	0	0	0	0	0	0	0	0
	218	0	0	0	0	0	0	0	0	0	0	0	0	0	0	0	0	0	0	0	0									218	0	0	0	0	0	0	0	0	0	0	0	0	0	0	0	0	0	0	0
	219	0	0	0	0	0	0	0	0	0	0	0	0	0	0	0	0	0	0	0	0									219	0	0	0	0	0	0	0	0	0	0	0	0	0	0	0	0	0	0	0
	220	0	0	0	0	0	0	0	0	0	0	0	0	0	0	0	0	0	0	0	0									220	0	0	0	0	0	0	0	0	0	0	0	0	0	0	0	0	0	0	0
	221	0	0	0	0	0	0	0	0	0	0	0	0	0	0	0	0	0	0	0	0									221	0	0	0	0	0	0	0	0	0	0	0	0	0	0	0	0	0	0	0
	222	0	0	0	0	0	0	0	0	0	0	0	0	0	0	0	0	0	0	0	0									222	0	0	0	0	0	0	0	0	0	0	0	0	0	0	0	0	0	0	0
	223	0	0	0	0	0	0	0	0	0	0	0	0	0	0	0	0	0	0	0	0									223	0	0	0	0	0	0	0	0	0	0	0	0	0	0	0	0	0	0	0
	224	0	0	0	0	0	0	0	0	0	0	0	0	0	0	0	0	0	0	0	0									224	0	0	0	0	0	0	0	0	0	0	0	0	0	0	0	0	0	0	0
	225	0	0	0	0	0	0	0	0	0	0	0	0	0	0	0	0	0	0	0	0									225	0	0	0	0	0	0	0	0	0	0	0	0	0	0	0	0	0	0	0
	226	0	0	0	0	0	0	0	0	0	0	0	0	0	0	0	0	0	0	0	0									226	0	0	0	0	0	0	0	0	0	0	0	0	0	0	0	0	0	0	0
	227	0	0	0	0	0	0	0	0	0	0	0	0	0	0	0	0	0	0	0	0									227	0	0	0	0	0	0	0	0	0	0	0	0	0	0	0	0	0	0	0
	228	0	0	0	0	0	0	0	0	0	0	0	0	0	0	0	0	0	0	0	0									228	0	0	0	0	0	0	0	0	0	0	0	0	0	0	0	0	0	0	0
	229	0	0	0	0	0	0	0	0	0	0	0	0	0	0	0	0	0	0	0	0									229	0	0	0	0	0	0	0	0	0	0	0	0	0	0	0	0	0	0	0
	230	0	0	0	0	0	0	0	0	0	0	0	0	0	0	0	0	0	0	0	0									230	0	0	0	0	0	0	0	0	0	0	0	0	0	0	0	0	0	0	0
	231	0	0	0	0	0	0	0	0	0	0	0	0	0	0	0	0	0	0	0	0									231	0	0	0	0	0	0	0	0	0	0	0	0	0	0	0	0	0	0	0
	232	0	0	0	0	0	0	0	0	0	0	0	0	0	0	0	0	0	0	0	0									232	0	0	0	0	0	0	0	0	0	0	0	0	0	0	0	0	0	0	0
	233	0	0	0	0	0	0	0	0	0	0	0	0	0	0	0	0	0	0	0	0									233	0	0	0	0	0	0	0	0	0	0	0	0	0	0	0	0	0	0	0
	234	0	0	0	0	0	0	0	0	0	0	0	0	0	0	0	0	0	0	0	0									234	0	0	0	0	0	0	0	0	0	0	0	0	0	0	0	0	0	0	0
	235	0	0	0	0	0	0	0	0	0	0	0	0	0	0	0	0	0	0	0	0									235	0	0	0	0	0	0	0	0	0	0	0	0	0	0	0	0	0	0	0
	236	0	0	0	0	0	0	0	0	0	0	0	0	0	0	0	0	0	0	0	0									236	0	0	0	0	0	0	0	0	0	0	0	0	0	0	0	0	0	0	0
	237	0	0	0	0	0	0	0	0	0	0	0	0	0	0	0	0	0	0	0	0									237	0	0	0	0	0	0	0	0	0	0	0	0	0	0	0	0	0	0	0
	238	0	0	0	0	0	0	0	0	0	0	0	0	0	0	0	0	0	0	0	0									238	0	0	0	0	0	0	0	0	0	0	0	0	0	0	0	0	0	0	0
	239	0	0	0	0	0	0	0	0	0	0	0	0	0	0	0	0	0	0	0	0									239	0	0	0	0	0	0	0	0	0	0	0	0	0	0	0	0	0	0	0
	240	0	0	0	0	0	0	0	0	0	0	0	0	0	0	0	0	0	0	0	0									240	0	0	0	0	0	0	0	0	0	0	0	0	0	0	0	0	0	0	0
	241	0	0	0	0	0	0	0	0	0	0	0	0	0	0	0	0	0	0	0	0									241	0	0	0	0	0	0	0	0	0	0	0	0	0	0	0	0	0	0	0
	242	0	0	0	0	0	0	0	0	0	0	0	0	0	0	0	0	0	0	0	0									242	0	0	0	0	0	0	0	0	0	0	0	0	0	0	0	0	0	0	0
	243	0	0	0	0	0	0	0	0	0	0	0	0	0	0	0	0	0	0	0	0									243	0	0	0	0	0	0	0	0	0	0	0	0	0	0	0	0	0	0	0
	244	0	0	0	0	0	0	0	0	0	0	0	0	0	0	0	0	0	0	0	0									244	0	0	0	0	0	0	0	0	0	0	0	0	0	0	0	0	0	0	0
	245	0	0	0	0	0	0	0	0	0	0	0	0	0	0	0	0	0	0	0	0									245	0	0	0	0	0	0	0	0	0	0	0	0	0	0	0	0	0	0	0
	246	0	0	0	0	0	0	0	0	0	0	0	0	0	0	0	0	0	0	0	0									246	0	0	0	0	0	0	0	0	0	0	0	0	0	0	0	0	0	0	0
	247	0	0	0	0	0	0	0	0	0	0	0	0	0	0	0	0	0	0	0	0									247	0	0	0	0	0	0	0	0	0	0	0	0	0	0	0	0	0	0	0
	248	0	0	0	0	0	0	0	0	0	0	0	0	0	0	0	0	0	0	0	0									248	0	0	0	0	0	0	0	0	0	0	0	0	0	0	0	0	0	0	0
	249	0	0	0	0	0	0	0	0	0	0	0	0	0	0	0	0	0	0	0	0									249	0	0	0	0	0	0	0	0	0	0	0	0	0	0	0	0	0	0	0
	250	0	0	0	0	0	0	0	0	0	0	0	0	0	0	0	0	0	0	0	0									250	0	0	0	0	0	0	0	0	0	0	0	0	0	0	0	0	0	0	0
	251	0	0	0	0	0	0	0	0	0	0	0	0	0	0	0	0	0	0	0	0									251	0	0	0	0	0	0	0	0	0	0	0	0	0	0	0	0	0	0	0
	252	0	0	0	0	0	0	0	0	0	0	0	0	0	0	0	0	0	0	0	0									252	0	0	0	0	0	0	0	0	0	0	0	0	0	0	0	0	0	0	0
	253	0	0	0	0	0	0	0	0	0	0	0	0	0	0	0	0	0	0	0	0									253	0	0	0	0	0	0	0	0	0	0	0	0	0	0	0	0	0	0	0
	254	0	0	0	0	0	0	0	0	0	0	0	0	0	0	0	0	0	0	0	0									254	0	0	0	0	0	0	0	0	0	0	0	0	0	0	0	0	0	0	0
	255	0	0	0	0	0	0	0	0	0	0	0	0	0	0	0	0	0	0	0	0									255	0	0	0	0	0	0	0	0	0	0	0	0	0	0	0	0	0	0	0
	256	0	0	0	0	0	0	0	0	0	0	0	0	0	0	0	0	0	0	0	0									256	0	0	0	0	0	0	0	0	0	0	0	0	0	0	0	0	0	0	0
	257	0	0	0	0	0	0	0	0	0	0	0	0	0	0	0	0	0	0	0	0									257	0	0	0	0	0	0	0	0	0	0	0	0	0	0	0	0	0	0	0
	258	0	0	0	0	0	0	0	0	0	0	0	0	0	0	0	0	0	0	0	0									258	0	0	0	0	0	0	0	0	0	0	0	0	0	0	0	0	0	0	0
	259	0	0	0	0	0	0	0	0	0	0	0	0	0	0	0	0	0	0	0	0									259	0	0	0	0	0	0	0	0	0	0	0	0	0	0	0	0	0	0	0
	260	0	0	0	0	0	0	0	0	0	0	0	0	0	0	0	0	0	0	0	0									260	0	0	0	0	0	0	0	0	0	0	0	0	0	0	0	0	0	0	0
	261	0	0	0	0	0	0	0	0	0	0	0	0	0	0	0	0	0	0	0	0									261	0	0	0	0	0	0	0	0	0	0	0	0	0	0	0	0	0	0	0
	262	0	0	0	0	0	0	0	0	0	0	0	0	0	0	0	0	0	0	0	0									262	0	0	0	0	0	0	0	0	0	0	0	0	0	0	0	0	0	0	0
	263	0	0	0	0	0	0	0	0	0	0	0	0	0	0	0	0	0	0	0	0									263	0	0	0	0	0	0	0	0	0	0	0	0	0	0	0	0	0	0	0
	264	0	0	0	0	0	0	0	0	0	0	0	0	0	0	0	0	0	0	0	0									264	0	0	0	0	0	0	0	0	0	0	0	0	0	0	0	0	0	0	0
	265	0	0	0	0	0	0	0	0	0	0	0	0	0	0	0	0	0	0	0	0									265	0	0	0	0	0	0	0	0	0	0	0	0	0	0	0	0	0	0	0
	266	0	0	0	0	0	0	0	0	0	0	0	0	0	0	0	0	0	0	0	0									266	0	0	0	0	0	0	0	0	0	0	0	0	0	0	0	0	0	0	0
	267	0	0	0	0	0	0	0	0	0	0	0	0	0	0	0	0	0	0	0	0									267	0	0	0	0	0	0	0	0	0	0	0	0	0	0	0	0	0	0	0
	268	0	0	0	0	0	0	0	0	0	0	0	0	0	0	0	0	0	0	0	0									268	0	0	0	0	0	0	0	0	0	0	0	0	0	0	0	0	0	0	0
	269	0	0	0	0	0	0	0	0	0	0	0	0	0	0	0	0	0	0	0	0									269	0	0	0	0	0	0	0	0	0	0	0	0	0	0	0	0	0	0	0
	270	0	0	0	0	0	0	0	0	0	0	0	0	0	0	0	0	0	0	0	0									270	0	0	0	0	0	0	0	0	0	0	0	0	0	0	0	0	0	0	0
	271	0	0	0	0	0	0	0	0	0	0	0	0	0	0	0	0	0	0	0	0									271	0	0	0	0	0	0	0	0	0	0	0	0	0	0	0	0	0	0	0
	272	0	0	0	0	0	0	0	0	0	0	0	0	0	0	0	0	0	0	0	0									272	0	0	0	0	0	0	0	0	0	0	0	0	0	0	0	0	0	0	0
	273	0	0	0	0	0	0	0	0	0	0	0	0	0	0	0	0	0	0	0	0									273	0	0	0	0	0	0	0	0	0	0	0	0	0	0	0	0	0	0	0
	274	0	0	0	0	0	0	0	0	0	0	0	0	0	0	0	0	0	0	0	0									274	0	0	0	0	0	0	0	0	0	0	0	0	0	0	0	0	0	0	0
	275	0	0	0	0	0	0	0	0	0	0	0	0	0	0	0	0	0	0	0	0									275	0	0	0	0	0	0	0	0	0	0	0	0	0	0	0	0	0	0	0
	276	0	0	0	0	0	0	0	0	0	0	0	0	0	0	0	0	0	0	0	0									276	0	0	0	0	0	0	0	0	0	0	0	0	0	0	0	0	0	0	0
	277	0	0	0	0	0	0	0	0	0	0	0	0	0	0	0	0	0	0	0	0									277	0	0	0	0	0	0	0	0	0	0	0	0	0	0	0	0	0	0	0
	278	0	0	0	0	0	0	0	0	0	0	0	0	0	0	0	0	0	0	0	0									278	0	0	0	0	0	0	0	0	0	0	0	0	0	0	0	0	0	0	0
	279	0	0	0	0	0	0	0	0	0	0	0	0	0	0	0	0	0	0	0	0									279	0	0	0	0	0	0	0	0	0	0	0	0	0	0	0	0	0	0	0
	280	0	0	0	0	0	0	0	0	0	0	0	0	0	0	0	0	0	0	0	0									280	0	0	0	0	0	0	0	0	0	0	0	0	0	0	0	0	0	0	0
	281	0	0	0	0	0	0	0	0	0	0	0	0	0	0	0	0	0	0	0	0									281	0	0	0	0	0	0	0	0	0	0	0	0	0	0	0	0	0	0	0
	282	0	0	0	0	0	0	0	0	0	0	0	0	0	0	0	0	0	0	0	0									282	0	0	0	0	0	0	0	0	0	0	0	0	0	0	0	0	0	0	0
	283	0	0	0	0	0	0	0	0	0	0	0	0	0	0	0	0	0	0	0	0									283	0	0	0	0	0	0	0	0	0	0	0	0	0	0	0	0	0	0	0
	284	0	0	0	0	0	0	0	0	0	0	0	0	0	0	0	0	0	0	0	0									284	0	0	0	0	0	0	0	0	0	0	0	0	0	0	0	0	0	0	0
	285	0	0	0	0	0	0	0	0	0	0	0	0	0	0	0	0	0	0	0	0									285	0	0	0	0	0	0	0	0	0	0	0	0	0	0	0	0	0	0	0
	286	0	0	0	0	0	0	0	0	0	0	0	0	0	0	0	0	0	0	0	0									286	0	0	0	0	0	0	0	0	0	0	0	0	0	0	0	0	0	0	0
	287	0	0	0	0	0	0	0	0	0	0	0	0	0	0	0	0	0	0	0	0									287	0	0	0	0	0	0	0	0	0	0	0	0	0	0	0	0	0	0	0
	288	0	0	0	0	0	0	0	0	0	0	0	0	0	0	0	0	0	0	0	0									288	0	0	0	0	0	0	0	0	0	0	0	0	0	0	0	0	0	0	0
	289	0	0	0	0	0	0	0	0	0	0	0	0	0	0	0	0	0	0	0	0									289	0	0	0	0	0	0	0	0	0	0	0	0	0	0	0	0	0	0	0
	290	0	0	0	0	0	0	0	0	0	0	0	0	0	0	0	0	0	0	0	0									290	0	0	0	0	0	0	0	0	0	0	0	0	0	0	0	0	0	0	0
	291	0	0	0	0	0	0	0	0	0	0	0	0	0	0	0	0	0	0	0	0									291	0	0	0	0	0	0	0	0	0	0	0	0	0	0	0	0	0	0	0
	292	0	0	0	0	0	0	0	0	0	0	0	0	0	0	0	0	0	0	0	0									292	0	0	0	0	0	0	0	0	0	0	0	0	0	0	0	0	0	0	0
	293	0	0	0	0	0	0	0	0	0	0	0	0	0	0	0	0	0	0	0	0									293	0	0	0	0	0	0	0	0	0	0	0	0	0	0	0	0	0	0	0
	294	0	0	0	0	0	0	0	0	0	0	0	0	0	0	0	0	0	0	0	0									294	0	0	0	0	0	0	0	0	0	0	0	0	0	0	0	0	0	0	0
	295	0	0	0	0	0	0	0	0	0	0	0	0	0	0	0	0	0	0	0	0									295	0	0	0	0	0	0	0	0	0	0	0	0	0	0	0	0	0	0	0
	296	0	0	0	0	0	0	0	0	0	0	0	0	0	0	0	0	0	0	0	0									296	0	0	0	0	0	0	0	0	0	0	0	0	0	0	0	0	0	0	0
	297	0	0	0	0	0	0	0	0	0	0	0	0	0	0	0	0	0	0	0	0									297	0	0	0	0	0	0	0	0	0	0	0	0	0	0	0	0	0	0	0
	298	0	0	0	0	0	0	0	0	0	0	0	0	0	0	0	0	0	0	0	0									298	0	0	0	0	0	0	0	0	0	0	0	0	0	0	0	0	0	0	0
	299	0	0	0	0	0	0	0	0	0	0	0	0	0	0	0	0	0	0	0	0									299	0	0	0	0	0	0	0	0	0	0	0	0	0	0	0	0	0	0	0
	300	0	0	0	0	0	0	0	0	0	0	0	0	0	0	0	0	0	0	0	0									300	0	0	0	0	0	0	0	0	0	0	0	0	0	0	0	0	0	0	0
	301	0	0	0	0	0	0	0	0	0	0	0	0	0	0	0	0	0	0	0	0									301	0	0	0	0	0	0	0	0	0	0	0	0	0	0	0	0	0	0	0
	302	0	0	0	0	0	0	0	0	0	0	0	0	0	0	0	0	0	0	0	0									302	0	0	0	0	0	0	0	0	0	0	0	0	0	0	0	0	0	0	0
	303	0	0	0	0	0	0	0	0	0	0	0	0	0	0	0	0	0	0	0	0									303	0	0	0	0	0	0	0	0	0	0	0	0	0	0	0	0	0	0	0
	304	0	0	0	0	0	0	0	0	0	0	0	0	0	0	0	0	0	0	0	0									304	0	0	0	0	0	0	0	0	0	0	0	0	0	0	0	0	0	0	0
	305	0	0	0	0	0	0	0	0	0	0	0	0	0	0	0	0	0	0	0	0									305	0	0	0	0	0	0	0	0	0	0	0	0	0	0	0	0	0	0	0
	306	0	0	0	0	0	0	0	0	0	0	0	0	0	0	0	0	0	0	0	0									306	0	0	0	0	0	0	0	0	0	0	0	0	0	0	0	0	0	0	0
	307	0	0	0	0	0	0	0	0	0	0	0	0	0	0	0	0	0	0	0	0									307	0	0	0	0	0	0	0	0	0	0	0	0	0	0	0	0	0	0	0
	308	0	0	0	0	0	0	0	0	0	0	0	0	0	0	0	0	0	0	0	0									308	0	0	0	0	0	0	0	0	0	0	0	0	0	0	0	0	0	0	0
	309	0	0	0	0	0	0	0	0	0	0	0	0	0	0	0	0	0	0	0	0									309	0	0	0	0	0	0	0	0	0	0	0	0	0	0	0	0	0	0	0
	310	0	0	0	0	0	0	0	0	0	0	0	0	0	0	0	0	0	0	0	0									310	0	0	0	0	0	0	0	0	0	0	0	0	0	0	0	0	0	0	0
	311	0	0	0	0	0	0	0	0	0	0	0	0	0	0	0	0	0	0	0	0									311	0	0	0	0	0	0	0	0	0	0	0	0	0	0	0	0	0	0	0
	312	0	0	0	0	0	0	0	0	0	0	0	0	0	0	0	0	0	0	0	0									312	0	0	0	0	0	0	0	0	0	0	0	0	0	0	0	0	0	0	0
	313	0	0	0	0	0	0	0	0	0	0	0	0	0	0	0	0	0	0	0	0									313	0	0	0	0	0	0	0	0	0	0	0	0	0	0	0	0	0	0	0
	314	0	0	0	0	0	0	0	0	0	0	0	0	0	0	0	0	0	0	0	0									314	0	0	0	0	0	0	0	0	0	0	0	0	0	0	0	0	0	0	0
	315	0	0	0	0	0	0	0	0	0	0	0	0	0	0	0	0	0	0	0	0									315	0	0	0	0	0	0	0	0	0	0	0	0	0	0	0	0	0	0	0
	316	0	0	0	0	0	0	0	0	0	0	0	0	0	0	0	0	0	0	0	0									316	0	0	0	0	0	0	0	0	0	0	0	0	0	0	0	0	0	0	0
	317	0	0	0	0	0	0	0	0	0	0	0	0	0	0	0	0	0	0	0	0									317	0	0	0	0	0	0	0	0	0	0	0	0	0	0	0	0	0	0	0
	318	0	0	0	0	0	0	0	0	0	0	0	0	0	0	0	0	0	0	0	0									318	0	0	0	0	0	0	0	0	0	0	0	0	0	0	0	0	0	0	0
	319	0	0	0	0	0	0	0	0	0	0	0	0	0	0	0	0	0	0	0	0									319	0	0	0	0	0	0	0	0	0	0	0	0	0	0	0	0	0	0	0
	320	0	0	0	0	0	0	0	0	0	0	0	0	0	0	0	0	0	0	0	0									320	0	0	0	0	0	0	0	0	0	0	0	0	0	0	0	0	0	0	0
	321	0	0	0	0	0	0	0	0	0	0	0	0	0	0	0	0	0	0	0	0									321	0	0	0	0	0	0	0	0	0	0	0	0	0	0	0	0	0	0	0
	322	0	0	0	0	0	0	0	0	0	0	0	0	0	0	0	0	0	0	0	0									322	0	0	0	0	0	0	0	0	0	0	0	0	0	0	0	0	0	0	0
	323	0	0	0	0	0	0	0	0	0	0	0	0	0	0	0	0	0	0	0	0									323	0	0	0	0	0	0	0	0	0	0	0	0	0	0	0	0	0	0	0
	324	0	0	0	0	0	0	0	0	0	0	0	0	0	0	0	0	0	0	0	0									324	0	0	0	0	0	0	0	0	0	0	0	0	0	0	0	0	0	0	0
	325	0	0	0	0	0	0	0	0	0	0	0	0	0	0	0	0	0	0	0	0									325	0	0	0	0	0	0	0	0	0	0	0	0	0	0	0	0	0	0	0
	326	0	0	0	0	0	0	0	0	0	0	0	0	0	0	0	0	0	0	0	0									326	0	0	0	0	0	0	0	0	0	0	0	0	0	0	0	0	0	0	0
	327	0	0	0	0	0	0	0	0	0	0	0	0	0	0	0	0	0	0	0	0									327	0	0	0	0	0	0	0	0	0	0	0	0	0	0	0	0	0	0	0
	328	0	0	0	0	0	0	0	0	0	0	0	0	0	0	0	0	0	0	0	0									328	0	0	0	0	0	0	0	0	0	0	0	0	0	0	0	0	0	0	0
	329	0	0	0	0	0	0	0	0	0	0	0	0	0	0	0	0	0	0	0	0									329	0	0	0	0	0	0	0	0	0	0	0	0	0	0	0	0	0	0	0
	330	0	0	0	0	0	0	0	0	0	0	0	0	0	0	0	0	0	0	0	0									330	0	0	0	0	0	0	0	0	0	0	0	0	0	0	0	0	0	0	0
	331	0	0	0	0	0	0	0	0	0	0	0	0	0	0	0	0	0	0	0	0									331	0	0	0	0	0	0	0	0	0	0	0	0	0	0	0	0	0	0	0
	332	0	0	0	0	0	0	0	0	0	0	0	0	0	0	0	0	0	0	0	0									332	0	0	0	0	0	0	0	0	0	0	0	0	0	0	0	0	0	0	0
	333	0	0	0	0	0	0	0	0	0	0	0	0	0	0	0	0	0	0	0	0									333	0	0	0	0	0	0	0	0	0	0	0	0	0	0	0	0	0	0	0
	334	0	0	0	0	0	0	0	0	0	0	0	0	0	0	0	0	0	0	0	0									334	0	0	0	0	0	0	0	0	0	0	0	0	0	0	0	0	0	0	0
	335	0	0	0	0	0	0	0	0	0	0	0	0	0	0	0	0	0	0	0	0									335	0	0	0	0	0	0	0	0	0	0	0	0	0	0	0	0	0	0	0
	336	0	0	0	0	0	0	0	0	0	0	0	0	0	0	0	0	0	0	0	0									336	0	0	0	0	0	0	0	0	0	0	0	0	0	0	0	0	0	0	0
	337	0	0	0	0	0	0	0	0	0	0	0	0	0	0	0	0	0	0	0	0									337	0	0	0	0	0	0	0	0	0	0	0	0	0	0	0	0	0	0	0
	338	0	0	0	0	0	0	0	0	0	0	0	0	0	0	0	0	0	0	0	0									338	0	0	0	0	0	0	0	0	0	0	0	0	0	0	0	0	0	0	0
	339	0	0	0	0	0	0	0	0	0	0	0	0	0	0	0	0	0	0	0	0									339	0	0	0	0	0	0	0	0	0	0	0	0	0	0	0	0	0	0	0
	340	0	0	0	0	0	0	0	0	0	0	0	0	0	0	0	0	0	0	0	0									340	0	0	0	0	0	0	0	0	0	0	0	0	0	0	0	0	0	0	0
	341	0	0	0	0	0	0	0	0	0	0	0	0	0	0	0	0	0	0	0	0									341	0	0	0	0	0	0	0	0	0	0	0	0	0	0	0	0	0	0	0
	342	0	0	0	0	0	0	0	0	0	0	0	0	0	0	0	0	0	0	0	0									342	0	0	0	0	0	0	0	0	0	0	0	0	0	0	0	0	0	0	0
	343	0	0	0	0	0	0	0	0	0	0	0	0	0	0	0	0	0	0	0	0									343	0	0	0	0	0	0	0	0	0	0	0	0	0	0	0	0	0	0	0
	344	0	0	0	0	0	0	0	0	0	0	0	0	0	0	0	0	0	0	0	0									344	0	0	0	0	0	0	0	0	0	0	0	0	0	0	0	0	0	0	0
	345	0	0	0	0	0	0	0	0	0	0	0	0	0	0	0	0	0	0	0	0									345	0	0	0	0	0	0	0	0	0	0	0	0	0	0	0	0	0	0	0
	346	0	0	0	0	0	0	0	0	0	0	0	0	0	0	0	0	0	0	0	0									346	0	0	0	0	0	0	0	0	0	0	0	0	0	0	0	0	0	0	0
	347	0	0	0	0	0	0	0	0	0	0	0	0	0	0	0	0	0	0	0	0									347	0	0	0	0	0	0	0	0	0	0	0	0	0	0	0	0	0	0	0
	348	0	0	0	0	0	0	0	0	0	0	0	0	0	0	0	0	0	0	0	0									348	0	0	0	0	0	0	0	0	0	0	0	0	0	0	0	0	0	0	0
	349	0	0	0	0	0	0	0	0	0	0	0	0	0	0	0	0	0	0	0	0									349	0	0	0	0	0	0	0	0	0	0	0	0	0	0	0	0	0	0	0
	350	0	0	0	0	0	0	0	0	0	0	0	0	0	0	0	0	0	0	0	0									350	0	0	0	0	0	0	0	0	0	0	0	0	0	0	0	0	0	0	0
	351	0	0	0	0	0	0	0	0	0	0	0	0	0	0	0	0	0	0	0	0									351	0	0	0	0	0	0	0	0	0	0	0	0	0	0	0	0	0	0	0
	352	0	0	0	0	0	0	0	0	0	0	0	0	0	0	0	0	0	0	0	0									352	0	0	0	0	0	0	0	0	0	0	0	0	0	0	0	0	0	0	0
	353	0	0	0	0	0	0	0	0	0	0	0	0	0	0	0	0	0	0	0	0									353	0	0	0	0	0	0	0	0	0	0	0	0	0	0	0	0	0	0	0
	354	0	0	0	0	0	0	0	0	0	0	0	0	0	0	0	0	0	0	0	0									354	0	0	0	0	0	0	0	0	0	0	0	0	0	0	0	0	0	0	0
	355	0	0	0	0	0	0	0	0	0	0	0	0	0	0	0	0	0	0	0	0									355	0	0	0	0	0	0	0	0	0	0	0	0	0	0	0	0	0	0	0
	356	0	0	0	0	0	0	0	0	0	0	0	0	0	0	0	0	0	0	0	0									356	0	0	0	0	0	0	0	0	0	0	0	0	0	0	0	0	0	0	0
	357	0	0	0	0	0	0	0	0	0	0	0	0	0	0	0	0	0	0	0	0									357	0	0	0	0	0	0	0	0	0	0	0	0	0	0	0	0	0	0	0
	358	0	0	0	0	0	0	0	0	0	0	0	0	0	0	0	0	0	0	0	0									358	0	0	0	0	0	0	0	0	0	0	0	0	0	0	0	0	0	0	0
	359	0	0	0	0	0	0	0	0	0	0	0	0	0	0	0	0	0	0	0	0									359	0	0	0	0	0	0	0	0	0	0	0	0	0	0	0	0	0	0	0
	360	0	0	0	0	0	0	0	0	0	0	0	0	0	0	0	0	0	0	0	0									360	0	0	0	0	0	0	0	0	0	0	0	0	0	0	0	0	0	0	0
	361	0	0	0	0	0	0	0	0	0	0	0	0	0	0	0	0	0	0	0	0									361	0	0	0	0	0	0	0	0	0	0	0	0	0	0	0	0	0	0	0
	362	0	0	0	0	0	0	0	0	0	0	0	0	0	0	0	0	0	0	0	0									362	0	0	0	0	0	0	0	0	0	0	0	0	0	0	0	0	0	0	0
	363	0	0	0	0	0	0	0	0	0	0	0	0	0	0	0	0	0	0	0	0									363	0	0	0	0	0	0	0	0	0	0	0	0	0	0	0	0	0	0	0
	364	0	0	0	0	0	0	0	0	0	0	0	0	0	0	0	0	0	0	0	0									364	0	0	0	0	0	0	0	0	0	0	0	0	0	0	0	0	0	0	0
	365	0	0	0	0	0	0	0	0	0	0	0	0	0	0	0	0	0	0	0	0									365	0	0	0	0	0	0	0	0	0	0	0	0	0	0	0	0	0	0	0
	366	0	0	0	0	0	0	0	0	0	0	0	0	0	0	0	0	0	0	0	0									366	0	0	0	0	0	0	0	0	0	0	0	0	0	0	0	0	0	0	0
	367	0	0	0	0	0	0	0	0	0	0	0	0	0	0	0	0	0	0	0	0									367	0	0	0	0	0	0	0	0	0	0	0	0	0	0	0	0	0	0	0
	368	0	0	0	0	0	0	0	0	0	0	0	0	0	0	0	0	0	0	0	0									368	0	0	0	0	0	0	0	0	0	0	0	0	0	0	0	0	0	0	0
	369	0	0	0	0	0	0	0	0	0	0	0	0	0	0	0	0	0	0	0	0									369	0	0	0	0	0	0	0	0	0	0	0	0	0	0	0	0	0	0	0
	370	0	0	0	0	0	0	0	0	0	0	0	0	0	0	0	0	0	0	0	0									370	0	0	0	0	0	0	0	0	0	0	0	0	0	0	0	0	0	0	0
	371	0	0	0	0	0	0	0	0	0	0	0	0	0	0	0	0	0	0	0	0									371	0	0	0	0	0	0	0	0	0	0	0	0	0	0	0	0	0	0	0
	372	0	0	0	0	0	0	0	0	0	0	0	0	0	0	0	0	0	0	0	0									372	0	0	0	0	0	0	0	0	0	0	0	0	0	0	0	0	0	0	0
	373	0	0	0	0	0	0	0	0	0	0	0	0	0	0	0	0	0	0	0	0									373	0	0	0	0	0	0	0	0	0	0	0	0	0	0	0	0	0	0	0
	374	0	0	0	0	0	0	0	0	0	0	0	0	0	0	0	0	0	0	0	0									374	0	0	0	0	0	0	0	0	0	0	0	0	0	0	0	0	0	0	0
	375	0	0	0	0	0	0	0	0	0	0	0	0	0	0	0	0	0	0	0	0									375	0	0	0	0	0	0	0	0	0	0	0	0	0	0	0	0	0	0	0
	376	0	0	0	0	0	0	0	0	0	0	0	0	0	0	0	0	0	0	0	0									376	0	0	0	0	0	0	0	0	0	0	0	0	0	0	0	0	0	0	0
	377	0	0	0	0	0	0	0	0	0	0	0	0	0	0	0	0	0	0	0	0									377	0	0	0	0	0	0	0	0	0	0	0	0	0	0	0	0	0	0	0
	378	0	0	0	0	0	0	0	0	0	0	0	0	0	0	0	0	0	0	0	0									378	0	0	0	0	0	0	0	0	0	0	0	0	0	0	0	0	0	0	0
	379	0	0	0	0	0	0	0	0	0	0	0	0	0	0	0	0	0	0	0	0									379	0	0	0	0	0	0	0	0	0	0	0	0	0	0	0	0	0	0	0
	380	0	0	0	0	0	0	0	0	0	0	0	0	0	0	0	0	0	0	0	0									380	0	0	0	0	0	0	0	0	0	0	0	0	0	0	0	0	0	0	0
	381	0	0	0	0	0	0	0	0	0	0	0	0	0	0	0	0	0	0	0	0									381	0	0	0	0	0	0	0	0	0	0	0	0	0	0	0	0	0	0	0
	382	0	0	0	0	0	0	0	0	0	0	0	0	0	0	0	0	0	0	0	0									382	0	0	0	0	0	0	0	0	0	0	0	0	0	0	0	0	0	0	0
	383	0	0	0	0	0	0	0	0	0	0	0	0	0	0	0	0	0	0	0	0									383	0	0	0	0	0	0	0	0	0	0	0	0	0	0	0	0	0	0	0
	384	0	0	0	0	0	0	0	0	0	0	0	0	0	0	0	0	0	0	0	0									384	0	0	0	0	0	0	0	0	0	0	0	0	0	0	0	0	0	0	0
	385	0	0	0	0	0	0	0	0	0	0	0	0	0	0	0	0	0	0	0	0									385	0	0	0	0	0	0	0	0	0	0	0	0	0	0	0	0	0	0	0
	386	0	0	0	0	0	0	0	0	0	0	0	0	0	0	0	0	0	0	0	0									386	0	0	0	0	0	0	0	0	0	0	0	0	0	0	0	0	0	0	0
	387	0	0	0	0	0	0	0	0	0	0	0	0	0	0	0	0	0	0	0	0									387	0	0	0	0	0	0	0	0	0	0	0	0	0	0	0	0	0	0	0
	388	0	0	0	0	0	0	0	0	0	0	0	0	0	0	0	0	0	0	0	0									388	0	0	0	0	0	0	0	0	0	0	0	0	0	0	0	0	0	0	0
	389	0	0	0	0	0	0	0	0	0	0	0	0	0	0	0	0	0	0	0	0									389	0	0	0	0	0	0	0	0	0	0	0	0	0	0	0	0	0	0	0
	390	0	0	0	0	0	0	0	0	0	0	0	0	0	0	0	0	0	0	0	0									390	0	0	0	0	0	0	0	0	0	0	0	0	0	0	0	0	0	0	0
	391	0	0	0	0	0	0	0	0	0	0	0	0	0	0	0	0	0	0	0	0									391	0	0	0	0	0	0	0	0	0	0	0	0	0	0	0	0	0	0	0
	392	0	0	0	0	0	0	0	0	0	0	0	0	0	0	0	0	0	0	0	0									392	0	0	0	0	0	0	0	0	0	0	0	0	0	0	0	0	0	0	0
	393	0	0	0	0	0	0	0	0	0	0	0	0	0	0	0	0	0	0	0	0									393	0	0	0	0	0	0	0	0	0	0	0	0	0	0	0	0	0	0	0
	394	0	0	0	0	0	0	0	0	0	0	0	0	0	0	0	0	0	0	0	0									394	0	0	0	0	0	0	0	0	0	0	0	0	0	0	0	0	0	0	0
	395	0	0	0	0	0	0	0	0	0	0	0	0	0	0	0	0	0	0	0	0									395	0	0	0	0	0	0	0	0	0	0	0	0	0	0	0	0	0	0	0
	396	0	0	0	0	0	0	0	0	0	0	0	0	0	0	0	0	0	0	0	0									396	0	0	0	0	0	0	0	0	0	0	0	0	0	0	0	0	0	0	0
	397	0	0	0	0	0	0	0	0	0	0	0	0	0	0	0	0	0	0	0	0									397	0	0	0	0	0	0	0	0	0	0	0	0	0	0	0	0	0	0	0
	398	0	0	0	0	0	0	0	0	0	0	0	0	0	0	0	0	0	0	0	0									398	0	0	0	0	0	0	0	0	0	0	0	0	0	0	0	0	0	0	0
	399	0	0	0	0	0	0	0	0	0	0	0	0	0	0	0	0	0	0	0	0									399	0	0	0	0	0	0	0	0	0	0	0	0	0	0	0	0	0	0	0
	400	0	0	0	0	0	0	0	0	0	0	0	0	0	0	0	0	0	0	0	0									400	0	0	0	0	0	0	0	0	0	0	0	0	0	0	0	0	0	0	0
	401	0	0	0	0	0	0	0	0	0	0	0	0	0	0	0	0	0	0	0	0									401	0	0	0	0	0	0	0	0	0	0	0	0	0	0	0	0	0	0	0
	402	0	0	0	0	0	0	0	0	0	0	0	0	0	0	0	0	0	0	0	0									402	0	0	0	0	0	0	0	0	0	0	0	0	0	0	0	0	0	0	0
	403	0	0	0	0	0	0	0	0	0	0	0	0	0	0	0	0	0	0	0	0									403	0	0	0	0	0	0	0	0	0	0	0	0	0	0	0	0	0	0	0
	404	0	0	0	0	0	0	0	0	0	0	0	0	0	0	0	0	0	0	0	0									404	0	0	0	0	0	0	0	0	0	0	0	0	0	0	0	0	0	0	0
	405	0	0	0	0	0	0	0	0	0	0	0	0	0	0	0	0	0	0	0	0									405	0	0	0	0	0	0	0	0	0	0	0	0	0	0	0	0	0	0	0
	406	0	0	0	0	0	0	0	0	0	0	0	0	0	0	0	0	0	0	0	0									406	0	0	0	0	0	0	0	0	0	0	0	0	0	0	0	0	0	0	0
	407	0	0	0	0	0	0	0	0	0	0	0	0	0	0	0	0	0	0	0	0									407	0	0	0	0	0	0	0	0	0	0	0	0	0	0	0	0	0	0	0
	408	0	0	0	0	0	0	0	0	0	0	0	0	0	0	0	0	0	0	0	0									408	0	0	0	0	0	0	0	0	0	0	0	0	0	0	0	0	0	0	0
	409	0	0	0	0	0	0	0	0	0	0	0	0	0	0	0	0	0	0	0	0									409	0	0	0	0	0	0	0	0	0	0	0	0	0	0	0	0	0	0	0
	410	0	0	0	0	0	0	0	0	0	0	0	0	0	0	0	0	0	0	0	0									410	0	0	0	0	0	0	0	0	0	0	0	0	0	0	0	0	0	0	0
	411	0	0	0	0	0	0	0	0	0	0	0	0	0	0	0	0	0	0	0	0									411	0	0	0	0	0	0	0	0	0	0	0	0	0	0	0	0	0	0	0
	412	0	0	0	0	0	0	0	0	0	0	0	0	0	0	0	0	0	0	0	0									412	0	0	0	0	0	0	0	0	0	0	0	0	0	0	0	0	0	0	0
	413	0	0	0	0	0	0	0	0	0	0	0	0	0	0	0	0	0	0	0	0									413	0	0	0	0	0	0	0	0	0	0	0	0	0	0	0	0	0	0	0
	414	0	0	0	0	0	0	0	0	0	0	0	0	0	0	0	0	0	0	0	0									414	0	0	0	0	0	0	0	0	0	0	0	0	0	0	0	0	0	0	0
	415	0	0	0	0	0	0	0	0	0	0	0	0	0	0	0	0	0	0	0	0									415	0	0	0	0	0	0	0	0	0	0	0	0	0	0	0	0	0	0	0
	416	0	0	0	0	0	0	0	0	0	0	0	0	0	0	0	0	0	0	0	0									416	0	0	0	0	0	0	0	0	0	0	0	0	0	0	0	0	0	0	0
	417	0	0	0	0	0	0	0	0	0	0	0	0	0	0	0	0	0	0	0	0									417	0	0	0	0	0	0	0	0	0	0	0	0	0	0	0	0	0	0	0
	418	0	0	0	0	0	0	0	0	0	0	0	0	0	0	0	0	0	0	0	0									418	0	0	0	0	0	0	0	0	0	0	0	0	0	0	0	0	0	0	0
	419	0	0	0	0	0	0	0	0	0	0	0	0	0	0	0	0	0	0	0	0									419	0	0	0	0	0	0	0	0	0	0	0	0	0	0	0	0	0	0	0
	420	0	0	0	0	0	0	0	0	0	0	0	0	0	0	0	0	0	0	0	0									420	0	0	0	0	0	0	0	0	0	0	0	0	0	0	0	0	0	0	0
	421	0	0	0	0	0	0	0	0	0	0	0	0	0	0	0	0	0	0	0	0									421	0	0	0	0	0	0	0	0	0	0	0	0	0	0	0	0	0	0	0
	422	0	0	0	0	0	0	0	0	0	0	0	0	0	0	0	0	0	0	0	0									422	0	0	0	0	0	0	0	0	0	0	0	0	0	0	0	0	0	0	0
	423	0	0	0	0	0	0	0	0	0	0	0	0	0	0	0	0	0	0	0	0									423	0	0	0	0	0	0	0	0	0	0	0	0	0	0	0	0	0	0	0
	424	0	0	0	0	0	0	0	0	0	0	0	0	0	0	0	0	0	0	0	0									424	0	0	0	0	0	0	0	0	0	0	0	0	0	0	0	0	0	0	0
	425	0	0	0	0	0	0	0	0	0	0	0	0	0	0	0	0	0	0	0	0									425	0	0	0	0	0	0	0	0	0	0	0	0	0	0	0	0	0	0	0
	426	0	0	0	0	0	0	0	0	0	0	0	0	0	0	0	0	0	0	0	0									426	0	0	0	0	0	0	0	0	0	0	0	0	0	0	0	0	0	0	0
	427	0	0	0	0	0	0	0	0	0	0	0	0	0	0	0	0	0	0	0	0									427	0	0	0	0	0	0	0	0	0	0	0	0	0	0	0	0	0	0	0
	428	0	0	0	0	0	0	0	0	0	0	0	0	0	0	0	0	0	0	0	0									428	0	0	0	0	0	0	0	0	0	0	0	0	0	0	0	0	0	0	0
	429	0	0	0	0	0	0	0	0	0	0	0	0	0	0	0	0	0	0	0	0									429	0	0	0	0	0	0	0	0	0	0	0	0	0	0	0	0	0	0	0
	430	0	0	0	0	0	0	0	0	0	0	0	0	0	0	0	0	0	0	0	0									430	0	0	0	0	0	0	0	0	0	0	0	0	0	0	0	0	0	0	0
	431	0	0	0	0	0	0	0	0	0	0	0	0	0	0	0	0	0	0	0	0									431	0	0	0	0	0	0	0	0	0	0	0	0	0	0	0	0	0	0	0
	432	0	0	0	0	0	0	0	0	0	0	0	0	0	0	0	0	0	0	0	0									432	0	0	0	0	0	0	0	0	0	0	0	0	0	0	0	0	0	0	0
	433	0	0	0	0	0	0	0	0	0	0	0	0	0	0	0	0	0	0	0	0									433	0	0	0	0	0	0	0	0	0	0	0	0	0	0	0	0	0	0	0
	434	0	0	0	0	0	0	0	0	0	0	0	0	0	0	0	0	0	0	0	0									434	0	0	0	0	0	0	0	0	0	0	0	0	0	0	0	0	0	0	0
	435	0	0	0	0	0	0	0	0	0	0	0	0	0	0	0	0	0	0	0	0									435	0	0	0	0	0	0	0	0	0	0	0	0	0	0	0	0	0	0	0
	436	0	0	0	0	0	0	0	0	0	0	0	0	0	0	0	0	0	0	0	0									436	0	0	0	0	0	0	0	0	0	0	0	0	0	0	0	0	0	0	0
	437	0	0	0	0	0	0	0	0	0	0	0	0	0	0	0	0	0	0	0	0									437	0	0	0	0	0	0	0	0	0	0	0	0	0	0	0	0	0	0	0
	438	0	0	0	0	0	0	0	0	0	0	0	0	0	0	0	0	0	0	0	0									438	0	0	0	0	0	0	0	0	0	0	0	0	0	0	0	0	0	0	0
	439	0	0	0	0	0	0	0	0	0	0	0	0	0	0	0	0	0	0	0	0									439	0	0	0	0	0	0	0	0	0	0	0	0	0	0	0	0	0	0	0
	440	0	0	0	0	0	0	0	0	0	0	0	0	0	0	0	0	0	0	0	0									440	0	0	0	0	0	0	0	0	0	0	0	0	0	0	0	0	0	0	0
	441	0	0	0	0	0	0	0	0	0	0	0	0	0	0	0	0	0	0	0	0									441	0	0	0	0	0	0	0	0	0	0	0	0	0	0	0	0	0	0	0
	442	0	0	0	0	0	0	0	0	0	0	0	0	0	0	0	0	0	0	0	0									442	0	0	0	0	0	0	0	0	0	0	0	0	0	0	0	0	0	0	0
	443	0	0	0	0	0	0	0	0	0	0	0	0	0	0	0	0	0	0	0	0									443	0	0	0	0	0	0	0	0	0	0	0	0	0	0	0	0	0	0	0
	444	0	0	0	0	0	0	0	0	0	0	0	0	0	0	0	0	0	0	0	0									444	0	0	0	0	0	0	0	0	0	0	0	0	0	0	0	0	0	0	0
	445	0	0	0	0	0	0	0	0	0	0	0	0	0	0	0	0	0	0	0	0									445	0	0	0	0	0	0	0	0	0	0	0	0	0	0	0	0	0	0	0
	446	0	0	0	0	0	0	0	0	0	0	0	0	0	0	0	0	0	0	0	0									446	0	0	0	0	0	0	0	0	0	0	0	0	0	0	0	0	0	0	0
	447	0	0	0	0	0	0	0	0	0	0	0	0	0	0	0	0	0	0	0	0									447	0	0	0	0	0	0	0	0	0	0	0	0	0	0	0	0	0	0	0
	448	0	0	0	0	0	0	0	0	0	0	0	0	0	0	0	0	0	0	0	0									448	0	0	0	0	0	0	0	0	0	0	0	0	0	0	0	0	0	0	0
	449	0	0	0	0	0	0	0	0	0	0	0	0	0	0	0	0	0	0	0	0									449	0	0	0	0	0	0	0	0	0	0	0	0	0	0	0	0	0	0	0
	450	0	0	0	0	0	0	0	0	0	0	0	0	0	0	0	0	0	0	0	0									450	0	0	0	0	0	0	0	0	0	0	0	0	0	0	0	0	0	0	0
	451	0	0	0	0	0	0	0	0	0	0	0	0	0	0	0	0	0	0	0	0									451	0	0	0	0	0	0	0	0	0	0	0	0	0	0	0	0	0	0	0
	452	0	0	0	0	0	0	0	0	0	0	0	0	0	0	0	0	0	0	0	0									452	0	0	0	0	0	0	0	0	0	0	0	0	0	0	0	0	0	0	0
	453	0	0	0	0	0	0	0	0	0	0	0	0	0	0	0	0	0	0	0	0									453	0	0	0	0	0	0	0	0	0	0	0	0	0	0	0	0	0	0	0
	454	0	0	0	0	0	0	0	0	0	0	0	0	0	0	0	0	0	0	0	0									454	0	0	0	0	0	0	0	0	0	0	0	0	0	0	0	0	0	0	0
	455	0	0	0	0	0	0	0	0	0	0	0	0	0	0	0	0	0	0	0	0									455	0	0	0	0	0	0	0	0	0	0	0	0	0	0	0	0	0	0	0
	456	0	0	0	0	0	0	0	0	0	0	0	0	0	0	0	0	0	0	0	0									456	0	0	0	0	0	0	0	0	0	0	0	0	0	0	0	0	0	0	0
	457	0	0	0	0	0	0	0	0	0	0	0	0	0	0	0	0	0	0	0	0									457	0	0	0	0	0	0	0	0	0	0	0	0	0	0	0	0	0	0	0
	458	0	0	0	0	0	0	0	0	0	0	0	0	0	0	0	0	0	0	0	0									458	0	0	0	0	0	0	0	0	0	0	0	0	0	0	0	0	0	0	0
	459	0	0	0	0	0	0	0	0	0	0	0	0	0	0	0	0	0	0	0	0									459	0	0	0	0	0	0	0	0	0	0	0	0	0	0	0	0	0	0	0
	460	0	0	0	0	0	0	0	0	0	0	0	0	0	0	0	0	0	0	0	0									460	0	0	0	0	0	0	0	0	0	0	0	0	0	0	0	0	0	0	0
	461	0	0	0	0	0	0	0	0	0	0	0	0	0	0	0	0	0	0	0	0									461	0	0	0	0	0	0	0	0	0	0	0	0	0	0	0	0	0	0	0
	462	0	0	0	0	0	0	0	0	0	0	0	0	0	0	0	0	0	0	0	0									462	0	0	0	0	0	0	0	0	0	0	0	0	0	0	0	0	0	0	0
	463	0	0	0	0	0	0	0	0	0	0	0	0	0	0	0	0	0	0	0	0									463	0	0	0	0	0	0	0	0	0	0	0	0	0	0	0	0	0	0	0
	464	0	0	0	0	0	0	0	0	0	0	0	0	0	0	0	0	0	0	0	0									464	0	0	0	0	0	0	0	0	0	0	0	0	0	0	0	0	0	0	0
	465	0	0	0	0	0	0	0	0	0	0	0	0	0	0	0	0	0	0	0	0									465	0	0	0	0	0	0	0	0	0	0	0	0	0	0	0	0	0	0	0
	466	0	0	0	0	0	0	0	0	0	0	0	0	0	0	0	0	0	0	0	0									466	0	0	0	0	0	0	0	0	0	0	0	0	0	0	0	0	0	0	0
	467	0	0	0	0	0	0	0	0	0	0	0	0	0	0	0	0	0	0	0	0									467	0	0	0	0	0	0	0	0	0	0	0	0	0	0	0	0	0	0	0
	468	0	0	0	0	0	0	0	0	0	0	0	0	0	0	0	0	0	0	0	0									468	0	0	0	0	0	0	0	0	0	0	0	0	0	0	0	0	0	0	0
	469	0	0	0	0	0	0	0	0	0	0	0	0	0	0	0	0	0	0	0	0									469	0	0	0	0	0	0	0	0	0	0	0	0	0	0	0	0	0	0	0
	470	0	0	0	0	0	0	0	0	0	0	0	0	0	0	0	0	0	0	0	0									470	0	0	0	0	0	0	0	0	0	0	0	0	0	0	0	0	0	0	0
	471	0	0	0	0	0	0	0	0	0	0	0	0	0	0	0	0	0	0	0	0									471	0	0	0	0	0	0	0	0	0	0	0	0	0	0	0	0	0	0	0
	472	0	0	0	0	0	0	0	0	0	0	0	0	0	0	0	0	0	0	0	0									472	0	0	0	0	0	0	0	0	0	0	0	0	0	0	0	0	0	0	0
	473	0	0	0	0	0	0	0	0	0	0	0	0	0	0	0	0	0	0	0	0									473	0	0	0	0	0	0	0	0	0	0	0	0	0	0	0	0	0	0	0
	474	0	0	0	0	0	0	0	0	0	0	0	0	0	0	0	0	0	0	0	0									474	0	0	0	0	0	0	0	0	0	0	0	0	0	0	0	0	0	0	0
	475	0	0	0	0	0	0	0	0	0	0	0	0	0	0	0	0	0	0	0	0									475	0	0	0	0	0	0	0	0	0	0	0	0	0	0	0	0	0	0	0
	476	0	0	0	0	0	0	0	0	0	0	0	0	0	0	0	0	0	0	0	0									476	0	0	0	0	0	0	0	0	0	0	0	0	0	0	0	0	0	0	0
	477	0	0	0	0	0	0	0	0	0	0	0	0	0	0	0	0	0	0	0	0									477	0	0	0	0	0	0	0	0	0	0	0	0	0	0	0	0	0	0	0
	478	0	0	0	0	0	0	0	0	0	0	0	0	0	0	0	0	0	0	0	0									478	0	0	0	0	0	0	0	0	0	0	0	0	0	0	0	0	0	0	0
	479	0	0	0	0	0	0	0	0	0	0	0	0	0	0	0	0	0	0	0	0									479	0	0	0	0	0	0	0	0	0	0	0	0	0	0	0	0	0	0	0
	480	0	0	0	0	0	0	0	0	0	0	0	0	0	0	0	0	0	0	0	0									480	0	0	0	0	0	0	0	0	0	0	0	0	0	0	0	0	0	0	0
	481	0	0	0	0	0	0	0	0	0	0	0	0	0	0	0	0	0	0	0	0									481	0	0	0	0	0	0	0	0	0	0	0	0	0	0	0	0	0	0	0
	482	0	0	0	0	0	0	0	0	0	0	0	0	0	0	0	0	0	0	0	0									482	0	0	0	0	0	0	0	0	0	0	0	0	0	0	0	0	0	0	0
	483	0	0	0	0	0	0	0	0	0	0	0	0	0	0	0	0	0	0	0	0									483	0	0	0	0	0	0	0	0	0	0	0	0	0	0	0	0	0	0	0
	484	0	0	0	0	0	0	0	0	0	0	0	0	0	0	0	0	0	0	0	0									484	0	0	0	0	0	0	0	0	0	0	0	0	0	0	0	0	0	0	0
	485	0	0	0	0	0	0	0	0	0	0	0	0	0	0	0	0	0	0	0	0									485	0	0	0	0	0	0	0	0	0	0	0	0	0	0	0	0	0	0	0
	486	0	0	0	0	0	0	0	0	0	0	0	0	0	0	0	0	0	0	0	0									486	0	0	0	0	0	0	0	0	0	0	0	0	0	0	0	0	0	0	0
	487	0	0	0	0	0	0	0	0	0	0	0	0	0	0	0	0	0	0	0	0									487	0	0	0	0	0	0	0	0	0	0	0	0	0	0	0	0	0	0	0
	488	0	0	0	0	0	0	0	0	0	0	0	0	0	0	0	0	0	0	0	0									488	0	0	0	0	0	0	0	0	0	0	0	0	0	0	0	0	0	0	0
	489	0	0	0	0	0	0	0	0	0	0	0	0	0	0	0	0	0	0	0	0									489	0	0	0	0	0	0	0	0	0	0	0	0	0	0	0	0	0	0	0
	490	0	0	0	0	0	0	0	0	0	0	0	0	0	0	0	0	0	0	0	0									490	0	0	0	0	0	0	0	0	0	0	0	0	0	0	0	0	0	0	0
	491	0	0	0	0	0	0	0	0	0	0	0	0	0	0	0	0	0	0	0	0									491	0	0	0	0	0	0	0	0	0	0	0	0	0	0	0	0	0	0	0
	492	0	0	0	0	0	0	0	0	0	0	0	0	0	0	0	0	0	0	0	0									492	0	0	0	0	0	0	0	0	0	0	0	0	0	0	0	0	0	0	0
	493	0	0	0	0	0	0	0	0	0	0	0	0	0	0	0	0	0	0	0	0									493	0	0	0	0	0	0	0	0	0	0	0	0	0	0	0	0	0	0	0
	494	0	0	0	0	0	0	0	0	0	0	0	0	0	0	0	0	0	0	0	0									494	0	0	0	0	0	0	0	0	0	0	0	0	0	0	0	0	0	0	0
	495	0	0	0	0	0	0	0	0	0	0	0	0	0	0	0	0	0	0	0	0									495	0	0	0	0	0	0	0	0	0	0	0	0	0	0	0	0	0	0	0
	496	0	0	0	0	0	0	0	0	0	0	0	0	0	0	0	0	0	0	0	0									496	0	0	0	0	0	0	0	0	0	0	0	0	0	0	0	0	0	0	0
	497	0	0	0	0	0	0	0	0	0	0	0	0	0	0	0	0	0	0	0	0									497	0	0	0	0	0	0	0	0	0	0	0	0	0	0	0	0	0	0	0
	498	0	0	0	0	0	0	0	0	0	0	0	0	0	0	0	0	0	0	0	0									498	0	0	0	0	0	0	0	0	0	0	0	0	0	0	0	0	0	0	0
	499	0	0	0	0	0	0	0	0	0	0	0	0	0	0	0	0	0	0	0	0									499	0	0	0	0	0	0	0	0	0	0	0	0	0	0	0	0	0	0	0
	500	0	0	0	0	0	0	0	0	0	0	0	0	0	0	0	0	0	0	0	0									500	0	0	0	0	0	0	0	0	0	0	0	0	0	0	0	0	0	0	0
	501	0	0	0	0	0	0	0	0	0	0	0	0	0	0	0	0	0	0	0	0									501	0	0	0	0	0	0	0	0	0	0	0	0	0	0	0	0	0	0	0
	502	0	0	0	0	0	0	0	0	0	0	0	0	0	0	0	0	0	0	0	0									502	0	0	0	0	0	0	0	0	0	0	0	0	0	0	0	0	0	0	0
	503	0	0	0	0	0	0	0	0	0	0	0	0	0	0	0	0	0	0	0	0									503	0	0	0	0	0	0	0	0	0	0	0	0	0	0	0	0	0	0	0
	504	0	0	0	0	0	0	0	0	0	0	0	0	0	0	0	0	0	0	0	0									504	0	0	0	0	0	0	0	0	0	0	0	0	0	0	0	0	0	0	0
	505	0	0	0	0	0	0	0	0	0	0	0	0	0	0	0	0	0	0	0	0									505	0	0	0	0	0	0	0	0	0	0	0	0	0	0	0	0	0	0	0
	506	0	0	0	0	0	0	0	0	0	0	0	0	0	0	0	0	0	0	0	0									506	0	0	0	0	0	0	0	0	0	0	0	0	0	0	0	0	0	0	0
	507	0	0	0	0	0	0	0	0	0	0	0	0	0	0	0	0	0	0	0	0									507	0	0	0	0	0	0	0	0	0	0	0	0	0	0	0	0	0	0	0
	508	0	0	0	0	0	0	0	0	0	0	0	0	0	0	0	0	0	0	0	0									508	0	0	0	0	0	0	0	0	0	0	0	0	0	0	0	0	0	0	0
	509	0	0	0	0	0	0	0	0	0	0	0	0	0	0	0	0	0	0	0	0									509	0	0	0	0	0	0	0	0	0	0	0	0	0	0	0	0	0	0	0
	510	0	0	0	0	0	0	0	0	0	0	0	0	0	0	0	0	0	0	0	0									510	0	0	0	0	0	0	0	0	0	0	0	0	0	0	0	0	0	0	0
	511	0	0	0	0	0	0	0	0	0	0	0	0	0	0	0	0	0	0	0	0									511	0	0	0	0	0	0	0	0	0	0	0	0	0	0	0	0	0	0	0
	512	0	0	0	0	0	0	0	0	0	0	0	0	0	0	0	0	0	0	0	0									512	0	0	0	0	0	0	0	0	0	0	0	0	0	0	0	0	0	0	0
	513	0	0	0	0	0	0	0	0	0	0	0	0	0	0	0	0	0	0	0	0									513	0	0	0	0	0	0	0	0	0	0	0	0	0	0	0	0	0	0	0
	514	0	0	0	0	0	0	0	0	0	0	0	0	0	0	0	0	0	0	0	0									514	0	0	0	0	0	0	0	0	0	0	0	0	0	0	0	0	0	0	0
	515	0	0	0	0	0	0	0	0	0	0	0	0	0	0	0	0	0	0	0	0									515	0	0	0	0	0	0	0	0	0	0	0	0	0	0	0	0	0	0	0
	516	0	0	0	0	0	0	0	0	0	0	0	0	0	0	0	0	0	0	0	0									516	0	0	0	0	0	0	0	0	0	0	0	0	0	0	0	0	0	0	0
	517	0	0	0	0	0	0	0	0	0	0	0	0	0	0	0	0	0	0	0	0									517	0	0	0	0	0	0	0	0	0	0	0	0	0	0	0	0	0	0	0
	518	0	0	0	0	0	0	0	0	0	0	0	0	0	0	0	0	0	0	0	0									518	0	0	0	0	0	0	0	0	0	0	0	0	0	0	0	0	0	0	0
	519	0	0	0	0	0	0	0	0	0	0	0	0	0	0	0	0	0	0	0	0									519	0	0	0	0	0	0	0	0	0	0	0	0	0	0	0	0	0	0	0
	520	0	0	0	0	0	0	0	0	0	0	0	0	0	0	0	0	0	0	0	0									520	0	0	0	0	0	0	0	0	0	0	0	0	0	0	0	0	0	0	0
	521	0	0	0	0	0	0	0	0	0	0	0	0	0	0	0	0	0	0	0	0									521	0	0	0	0	0	0	0	0	0	0	0	0	0	0	0	0	0	0	0
	522	0	0	0	0	0	0	0	0	0	0	0	0	0	0	0	0	0	0	0	0									522	0	0	0	0	0	0	0	0	0	0	0	0	0	0	0	0	0	0	0
	523	0	0	0	0	0	0	0	0	0	0	0	0	0	0	0	0	0	0	0	0									523	0	0	0	0	0	0	0	0	0	0	0	0	0	0	0	0	0	0	0
	524	0	0	0	0	0	0	0	0	0	0	0	0	0	0	0	0	0	0	0	0									524	0	0	0	0	0	0	0	0	0	0	0	0	0	0	0	0	0	0	0
	525	0	0	0	0	0	0	0	0	0	0	0	0	0	0	0	0	0	0	0	0									525	0	0	0	0	0	0	0	0	0	0	0	0	0	0	0	0	0	0	0
	526	0	0	0	0	0	0	0	0	0	0	0	0	0	0	0	0	0	0	0	0									526	0	0	0	0	0	0	0	0	0	0	0	0	0	0	0	0	0	0	0
	527	0	0	0	0	0	0	0	0	0	0	0	0	0	0	0	0	0	0	0	0									527	0	0	0	0	0	0	0	0	0	0	0	0	0	0	0	0	0	0	0
	528	0	0	0	0	0	0	0	0	0	0	0	0	0	0	0	0	0	0	0	0									528	0	0	0	0	0	0	0	0	0	0	0	0	0	0	0	0	0	0	0
	529	0	0	0	0	0	0	0	0	0	0	0	0	0	0	0	0	0	0	0	0									529	0	0	0	0	0	0	0	0	0	0	0	0	0	0	0	0	0	0	0
	530	0	0	0	0	0	0	0	0	0	0	0	0	0	0	0	0	0	0	0	0									530	0	0	0	0	0	0	0	0	0	0	0	0	0	0	0	0	0	0	0
	531	0	0	0	0	0	0	0	0	0	0	0	0	0	0	0	0	0	0	0	0									531	0	0	0	0	0	0	0	0	0	0	0	0	0	0	0	0	0	0	0
	532	0	0	0	0	0	0	0	0	0	0	0	0	0	0	0	0	0	0	0	0									532	0	0	0	0	0	0	0	0	0	0	0	0	0	0	0	0	0	0	0
	533	0	0	0	0	0	0	0	0	0	0	0	0	0	0	0	0	0	0	0	0									533	0	0	0	0	0	0	0	0	0	0	0	0	0	0	0	0	0	0	0
	534	0	0	0	0	0	0	0	0	0	0	0	0	0	0	0	0	0	0	0	0									534	0	0	0	0	0	0	0	0	0	0	0	0	0	0	0	0	0	0	0
	535	0	0	0	0	0	0	0	0	0	0	0	0	0	0	0	0	0	0	0	0									535	0	0	0	0	0	0	0	0	0	0	0	0	0	0	0	0	0	0	0
	536	0	0	0	0	0	0	0	0	0	0	0	0	0	0	0	0	0	0	0	0									536	0	0	0	0	0	0	0	0	0	0	0	0	0	0	0	0	0	0	0
	537	0	0	0	0	0	0	0	0	0	0	0	0	0	0	0	0	0	0	0	0									537	0	0	0	0	0	0	0	0	0	0	0	0	0	0	0	0	0	0	0
	538	0	0	0	0	0	0	0	0	0	0	0	0	0	0	0	0	0	0	0	0									538	0	0	0	0	0	0	0	0	0	0	0	0	0	0	0	0	0	0	0
	539	0	0	0	0	0	0	0	0	0	0	0	0	0	0	0	0	0	0	0	0									539	0	0	0	0	0	0	0	0	0	0	0	0	0	0	0	0	0	0	0
	540	0	0	0	0	0	0	0	0	0	0	0	0	0	0	0	0	0	0	0	0									540	0	0	0	0	0	0	0	0	0	0	0	0	0	0	0	0	0	0	0
	541	0	0	0	0	0	0	0	0	0	0	0	0	0	0	0	0	0	0	0	0									541	0	0	0	0	0	0	0	0	0	0	0	0	0	0	0	0	0	0	0
	542	0	0	0	0	0	0	0	0	0	0	0	0	0	0	0	0	0	0	0	0									542	0	0	0	0	0	0	0	0	0	0	0	0	0	0	0	0	0	0	0
	543	0	0	0	0	0	0	0	0	0	0	0	0	0	0	0	0	0	0	0	0									543	0	0	0	0	0	0	0	0	0	0	0	0	0	0	0	0	0	0	0
	544	0	0	0	0	0	0	0	0	0	0	0	0	0	0	0	0	0	0	0	0									544	0	0	0	0	0	0	0	0	0	0	0	0	0	0	0	0	0	0	0
	545	0	0	0	0	0	0	0	0	0	0	0	0	0	0	0	0	0	0	0	0									545	0	0	0	0	0	0	0	0	0	0	0	0	0	0	0	0	0	0	0
	546	0	0	0	0	0	0	0	0	0	0	0	0	0	0	0	0	0	0	0	0									546	0	0	0	0	0	0	0	0	0	0	0	0	0	0	0	0	0	0	0
	547	0	0	0	0	0	0	0	0	0	0	0	0	0	0	0	0	0	0	0	0									547	0	0	0	0	0	0	0	0	0	0	0	0	0	0	0	0	0	0	0
	548	0	0	0	0	0	0	0	0	0	0	0	0	0	0	0	0	0	0	0	0									548	0	0	0	0	0	0	0	0	0	0	0	0	0	0	0	0	0	0	0
	549	0	0	0	0	0	0	0	0	0	0	0	0	0	0	0	0	0	0	0	0									549	0	0	0	0	0	0	0	0	0	0	0	0	0	0	0	0	0	0	0
	550	0	0	0	0	0	0	0	0	0	0	0	0	0	0	0	0	0	0	0	0									550	0	0	0	0	0	0	0	0	0	0	0	0	0	0	0	0	0	0	0
	551	0	0	0	0	0	0	0	0	0	0	0	0	0	0	0	0	0	0	0	0									551	0	0	0	0	0	0	0	0	0	0	0	0	0	0	0	0	0	0	0
	552	0	0	0	0	0	0	0	0	0	0	0	0	0	0	0	0	0	0	0	0									552	0	0	0	0	0	0	0	0	0	0	0	0	0	0	0	0	0	0	0
	553	0	0	0	0	0	0	0	0	0	0	0	0	0	0	0	0	0	0	0	0									553	0	0	0	0	0	0	0	0	0	0	0	0	0	0	0	0	0	0	0
	554	0	0	0	0	0	0	0	0	0	0	0	0	0	0	0	0	0	0	0	0									554	0	0	0	0	0	0	0	0	0	0	0	0	0	0	0	0	0	0	0
	555	0	0	0	0	0	0	0	0	0	0	0	0	0	0	0	0	0	0	0	0									555	0	0	0	0	0	0	0	0	0	0	0	0	0	0	0	0	0	0	0
	556	0	0	0	0	0	0	0	0	0	0	0	0	0	0	0	0	0	0	0	0									556	0	0	0	0	0	0	0	0	0	0	0	0	0	0	0	0	0	0	0
	557	0	0	0	0	0	0	0	0	0	0	0	0	0	0	0	0	0	0	0	0									557	0	0	0	0	0	0	0	0	0	0	0	0	0	0	0	0	0	0	0
	558	0	0	0	0	0	0	0	0	0	0	0	0	0	0	0	0	0	0	0	0									558	0	0	0	0	0	0	0	0	0	0	0	0	0	0	0	0	0	0	0
	559	0	0	0	0	0	0	0	0	0	0	0	0	0	0	0	0	0	0	0	0									559	0	0	0	0	0	0	0	0	0	0	0	0	0	0	0	0	0	0	0
	560	0	0	0	0	0	0	0	0	0	0	0	0	0	0	0	0	0	0	0	0									560	0	0	0	0	0	0	0	0	0	0	0	0	0	0	0	0	0	0	0
	561	0	0	0	0	0	0	0	0	0	0	0	0	0	0	0	0	0	0	0	0									561	0	0	0	0	0	0	0	0	0	0	0	0	0	0	0	0	0	0	0
	562	0	0	0	0	0	0	0	0	0	0	0	0	0	0	0	0	0	0	0	0									562	0	0	0	0	0	0	0	0	0	0	0	0	0	0	0	0	0	0	0
	563	0	0	0	0	0	0	0	0	0	0	0	0	0	0	0	0	0	0	0	0									563	0	0	0	0	0	0	0	0	0	0	0	0	0	0	0	0	0	0	0
	564	0	0	0	0	0	0	0	0	0	0	0	0	0	0	0	0	0	0	0	0									564	0	0	0	0	0	0	0	0	0	0	0	0	0	0	0	0	0	0	0
[truncated: 658 more rows]
[truncated: 3 more columns]

## Sheet: D03 (Aligned seq.)
	OPTINALYSIS: SEQUENCE ANALYSIS THROUGH A LOOKING-GLASS
[truncated: 1,247 more rows]
[truncated: 3 more columns]

## Sheet: D04 (Aligned seq.)
	OPTINALYSIS: SEQUENCE ANALYSIS THROUGH A LOOKING-GLASS
[truncated: 1,247 more rows]
[truncated: 3 more columns]

[truncated: 5 more sheets: L01 (Unaligned seq.), L02 (Unaligned seq.), L03 (Aligned seq.), L04 (Aligned seq.), Sheet1]
